# Supplementary material for: Inside or outside the box? Effect of substrate location on coordination-cage based catalysis
Source: Royal Society of Chemistry journal article supplement (doi:10.1039/d2dt01713j), 2022-01-01

## Inside or outside the box? Effect of substrate location on coordination-cage based catalysis

Atena B. Solea, Burin Sudittapong, Christopher G. P. Taylor and Michael D. Ward\*

### Supporting information: data for catalysis studies using diacetyl-fluorescein as substrate

#### Contents

|                                                                                                                                                                                                                                     |    |
|-------------------------------------------------------------------------------------------------------------------------------------------------------------------------------------------------------------------------------------|----|
| Catalysis of <b>DAF</b> to <b>FLU</b> with 0.1 mM <b>CoH<sup>W</sup>Cl</b> added (50 mM PBS pH 7) at various DAF concentrations (0.005-0.300 mM).....                                                                               | 2  |
| Catalysis of <b>DAF</b> to <b>FLU</b> with concentrations of <b>CoH<sup>W</sup>Cl</b> between 0.05-0.150 mM ([ <b>DAF</b> ]=0.065 mM, 50 mM PBS buffer pH 7) .....                                                                  | 71 |
| Catalysis of <b>DAF</b> to <b>FLU</b> in the presence of <b>CoH<sup>W</sup>BF<sub>4</sub></b> and various anions (0.25 mM <b>DAF</b> , 5 mM anion, 50 mM pH 7 <b>PBS</b> buffer, 0.1 mM <b>CoH<sup>W</sup>BF<sub>4</sub></b> )..... | 91 |

Catalysis of **DAF** to **FLU** with 0.1 mM **CoH<sup>w</sup>Cl** added (50 mM PBS pH 7) at various DAF concentrations (0.005-0.300 mM)

**DAF varied for 0.1mM CoHwCl**

0.005 mM DAF

| Time (min) | A@490nm minus BK | set to 0  | [FLU] (M) | [DAF] (M) | ln[DAF]  |
|------------|------------------|-----------|-----------|-----------|----------|
| 0          | 0.024            | 0         | 0         | 0.000005  | -12.2061 |
| 2          | 0.022            | -0.00225  | -2.8E-08  | 5.03E-06  | -12.2005 |
| 4          | 0.02225          | -0.00175  | -2.2E-08  | 5.02E-06  | -12.2017 |
| 6          | 0.02275          | -0.00375  | -4.7E-08  | 5.05E-06  | -12.1967 |
| 8          | 0.0235           | -0.001    | -1.3E-08  | 5.01E-06  | -12.2036 |
| 10         | 0.023            | -0.0015   | -1.9E-08  | 5.02E-06  | -12.2023 |
| 12         | 0.02225          | -0.0015   | -1.9E-08  | 5.02E-06  | -12.2023 |
| 14         | 0.022            | -0.00325  | -4.1E-08  | 5.04E-06  | -12.198  |
| 16         | 0.02275          | -0.00125  | -1.6E-08  | 5.02E-06  | -12.203  |
| 18         | 0.0225           | -0.00175  | -2.2E-08  | 5.02E-06  | -12.2017 |
| 20         | 0.02375          | -7.50E-04 | -9.4E-09  | 5.01E-06  | -12.2042 |
| 22         | 0.0225           | -0.00325  | -4.1E-08  | 5.04E-06  | -12.198  |
| 24         | 0.02275          | -0.002    | -2.5E-08  | 5.03E-06  | -12.2011 |
| 26         | 0.02225          | -0.00225  | -2.8E-08  | 5.03E-06  | -12.2005 |
| 28         | 0.02275          | -0.0015   | -1.9E-08  | 5.02E-06  | -12.2023 |
| 30         | 0.02325          | -2.50E-04 | -3.1E-09  | 5E-06     | -12.2054 |
| 32         | 0.02325          | -7.50E-04 | -9.4E-09  | 5.01E-06  | -12.2042 |
| 34         | 0.02275          | -0.00125  | -1.6E-08  | 5.02E-06  | -12.203  |
| 36         | 0.02275          | -0.00175  | -2.2E-08  | 5.02E-06  | -12.2017 |
| 38         | 0.02325          | -7.50E-04 | -9.4E-09  | 5.01E-06  | -12.2042 |
| 40         | 0.023            | -0.00125  | -1.6E-08  | 5.02E-06  | -12.203  |
| 42         | 0.02375          | -2.50E-04 | -3.1E-09  | 5E-06     | -12.2054 |
| 44         | 0.0235           | -2.50E-04 | -3.1E-09  | 5E-06     | -12.2054 |
| 46         | 0.02325          | -0.00175  | -2.2E-08  | 5.02E-06  | -12.2017 |
| 48         | 0.02425          | 2.50E-04  | 3.13E-09  | 5E-06     | -12.2067 |
| 50         | 0.025            | 0.0015    | 1.88E-08  | 4.98E-06  | -12.2098 |
| 52         | 0.023            | 0         | 0         | 0.000005  | -12.2061 |
| 54         | 0.02425          | 5.00E-04  | 6.25E-09  | 4.99E-06  | -12.2073 |
| 56         | 0.0245           | 0.00125   | 1.56E-08  | 4.98E-06  | -12.2092 |
| 58         | 0.02425          | -2.50E-04 | -3.1E-09  | 5E-06     | -12.2054 |
| 60         | 0.024            | 5.00E-04  | 6.25E-09  | 4.99E-06  | -12.2073 |
| 62         | 0.0245           | 2.50E-04  | 3.13E-09  | 5E-06     | -12.2067 |
| 64         | 0.0245           | 5.00E-04  | 6.25E-09  | 4.99E-06  | -12.2073 |
| 66         | 0.02475          | 5.00E-04  | 6.25E-09  | 4.99E-06  | -12.2073 |
| 68         | 0.02475          | 0         | 0         | 0.000005  | -12.2061 |
| 70         | 0.02575          | 0.00175   | 2.19E-08  | 4.98E-06  | -12.2105 |
| 72         | 0.0245           | 0         | 0         | 0.000005  | -12.2061 |
| 74         | 0.0245           | 5.00E-04  | 6.25E-09  | 4.99E-06  | -12.2073 |

|     |         |           |          |          |          |
|-----|---------|-----------|----------|----------|----------|
| 76  | 0.025   | 5.00E-04  | 6.25E-09 | 4.99E-06 | -12.2073 |
| 78  | 0.02525 | 0.00225   | 2.81E-08 | 4.97E-06 | -12.2117 |
| 80  | 0.025   | 7.50E-04  | 9.38E-09 | 4.99E-06 | -12.2079 |
| 82  | 0.02525 | 0.002     | 2.5E-08  | 4.98E-06 | -12.2111 |
| 84  | 0.024   | -7.50E-04 | -9.4E-09 | 5.01E-06 | -12.2042 |
| 86  | 0.02575 | 0.001     | 1.25E-08 | 4.99E-06 | -12.2086 |
| 88  | 0.02575 | 0.00175   | 2.19E-08 | 4.98E-06 | -12.2105 |
| 90  | 0.02575 | 0.002     | 2.5E-08  | 4.98E-06 | -12.2111 |
| 92  | 0.0255  | 0.00125   | 1.56E-08 | 4.98E-06 | -12.2092 |
| 94  | 0.0255  | 0.00175   | 2.19E-08 | 4.98E-06 | -12.2105 |
| 96  | 0.0265  | 0.00275   | 3.44E-08 | 4.97E-06 | -12.213  |
| 98  | 0.027   | 0.00225   | 2.81E-08 | 4.97E-06 | -12.2117 |
| 100 | 0.026   | 0.00275   | 3.44E-08 | 4.97E-06 | -12.213  |
| 102 | 0.02625 | 0.0015    | 1.88E-08 | 4.98E-06 | -12.2098 |
| 104 | 0.02625 | 0.0025    | 3.13E-08 | 4.97E-06 | -12.2123 |
| 106 | 0.02625 | 0.003     | 3.75E-08 | 4.96E-06 | -12.2136 |
| 108 | 0.0265  | 0.003     | 3.75E-08 | 4.96E-06 | -12.2136 |
| 110 | 0.0265  | 0.00175   | 2.19E-08 | 4.98E-06 | -12.2105 |
| 112 | 0.02725 | 0.0035    | 4.38E-08 | 4.96E-06 | -12.2149 |
| 114 | 0.0265  | 0.0025    | 3.13E-08 | 4.97E-06 | -12.2123 |
| 116 | 0.027   | 0.00225   | 2.81E-08 | 4.97E-06 | -12.2117 |
| 118 | 0.02675 | 0.0025    | 3.13E-08 | 4.97E-06 | -12.2123 |
| 120 | 0.027   | 0.003     | 3.75E-08 | 4.96E-06 | -12.2136 |
| 122 | 0.02725 | 0.00275   | 3.44E-08 | 4.97E-06 | -12.213  |
| 124 | 0.02775 | 0.004     | 5E-08    | 4.95E-06 | -12.2161 |
| 126 | 0.02875 | 0.00425   | 5.31E-08 | 4.95E-06 | -12.2168 |
| 128 | 0.02775 | 0.0035    | 4.38E-08 | 4.96E-06 | -12.2149 |
| 130 | 0.02875 | 0.004     | 5E-08    | 4.95E-06 | -12.2161 |
| 132 | 0.028   | 0.0045    | 5.63E-08 | 4.94E-06 | -12.2174 |
| 134 | 0.02875 | 0.00425   | 5.31E-08 | 4.95E-06 | -12.2168 |
| 136 | 0.02775 | 0.003     | 3.75E-08 | 4.96E-06 | -12.2136 |
| 138 | 0.02925 | 0.0089    | 1.11E-07 | 4.89E-06 | -12.2286 |
| 140 | 0.02825 | 0.004     | 5E-08    | 4.95E-06 | -12.2161 |
| 142 | 0.029   | 0.004     | 5E-08    | 4.95E-06 | -12.2161 |
| 144 | 0.02925 | 0.0045    | 5.63E-08 | 4.94E-06 | -12.2174 |
| 146 | 0.0285  | 0.00325   | 4.06E-08 | 4.96E-06 | -12.2142 |
| 148 | 0.02875 | 0.00375   | 4.69E-08 | 4.95E-06 | -12.2155 |
| 150 | 0.0285  | 0.00325   | 4.06E-08 | 4.96E-06 | -12.2142 |
| 152 | 0.02975 | 0.005     | 6.25E-08 | 4.94E-06 | -12.2187 |
| 154 | 0.02975 | 0.005     | 6.25E-08 | 4.94E-06 | -12.2187 |
| 156 | 0.029   | 0.0045    | 5.63E-08 | 4.94E-06 | -12.2174 |
| 158 | 0.02975 | 0.00475   | 5.94E-08 | 4.94E-06 | -12.218  |
| 160 | 0.0295  | 0.00425   | 5.31E-08 | 4.95E-06 | -12.2168 |
| 162 | 0.029   | 0.00375   | 4.69E-08 | 4.95E-06 | -12.2155 |
| 164 | 0.03025 | 0.00525   | 6.56E-08 | 4.93E-06 | -12.2193 |
| 166 | 0.03    | 0.0055    | 6.88E-08 | 4.93E-06 | -12.2199 |

|     |         |         |          |          |          |
|-----|---------|---------|----------|----------|----------|
| 168 | 0.03075 | 0.00575 | 7.19E-08 | 4.93E-06 | -12.2206 |
| 170 | 0.03025 | 0.00525 | 6.56E-08 | 4.93E-06 | -12.2193 |
| 172 | 0.02975 | 0.005   | 6.25E-08 | 4.94E-06 | -12.2187 |
| 174 | 0.03075 | 0.006   | 7.5E-08  | 4.93E-06 | -12.2212 |
| 176 | 0.03075 | 0.00475 | 5.94E-08 | 4.94E-06 | -12.218  |
| 178 | 0.031   | 0.00625 | 7.81E-08 | 4.92E-06 | -12.2218 |
| 180 | 0.0285  | 0.00425 | 5.31E-08 | 4.95E-06 | -12.2168 |
| 182 | 0.03075 | 0.0055  | 6.88E-08 | 4.93E-06 | -12.2199 |
| 184 | 0.03075 | 0.00575 | 7.19E-08 | 4.93E-06 | -12.2206 |
| 186 | 0.03025 | 0.005   | 6.25E-08 | 4.94E-06 | -12.2187 |
| 188 | 0.031   | 0.006   | 7.5E-08  | 4.93E-06 | -12.2212 |
| 190 | 0.0305  | 0.00625 | 7.81E-08 | 4.92E-06 | -12.2218 |
| 192 | 0.0315  | 0.00625 | 7.81E-08 | 4.92E-06 | -12.2218 |
| 194 | 0.03125 | 0.006   | 7.5E-08  | 4.93E-06 | -12.2212 |
| 196 | 0.03125 | 0.00675 | 8.44E-08 | 4.92E-06 | -12.2231 |
| 198 | 0.03225 | 0.00825 | 1.03E-07 | 4.9E-06  | -12.2269 |
| 200 | 0.032   | 0.00675 | 8.44E-08 | 4.92E-06 | -12.2231 |
| 202 | 0.032   | 0.0075  | 9.38E-08 | 4.91E-06 | -12.225  |
| 204 | 0.03225 | 0.00775 | 9.69E-08 | 4.9E-06  | -12.2256 |
| 206 | 0.03225 | 0.00775 | 9.69E-08 | 4.9E-06  | -12.2256 |
| 208 | 0.0315  | 0.007   | 8.75E-08 | 4.91E-06 | -12.2237 |
| 210 | 0.03225 | 0.0075  | 9.38E-08 | 4.91E-06 | -12.225  |
| 212 | 0.032   | 0.00675 | 8.44E-08 | 4.92E-06 | -12.2231 |
| 214 | 0.03275 | 0.0075  | 9.38E-08 | 4.91E-06 | -12.225  |
| 216 | 0.0325  | 0.00625 | 7.81E-08 | 4.92E-06 | -12.2218 |
| 218 | 0.03175 | 0.006   | 7.5E-08  | 4.93E-06 | -12.2212 |
| 220 | 0.03325 | 0.00825 | 1.03E-07 | 4.9E-06  | -12.2269 |
| 222 | 0.033   | 0.00775 | 9.69E-08 | 4.9E-06  | -12.2256 |
| 224 | 0.03275 | 0.008   | 1E-07    | 4.9E-06  | -12.2263 |
| 226 | 0.0335  | 0.00775 | 9.69E-08 | 4.9E-06  | -12.2256 |
| 228 | 0.033   | 0.0075  | 9.38E-08 | 4.91E-06 | -12.225  |
| 230 | 0.03375 | 0.00875 | 1.09E-07 | 4.89E-06 | -12.2282 |
| 232 | 0.0335  | 0.008   | 1E-07    | 4.9E-06  | -12.2263 |
| 234 | 0.03275 | 0.0065  | 8.13E-08 | 4.92E-06 | -12.2225 |
| 236 | 0.033   | 0.0085  | 1.06E-07 | 4.89E-06 | -12.2276 |
| 238 | 0.03275 | 0.00725 | 9.06E-08 | 4.91E-06 | -12.2244 |
| 240 | 0.033   | 0.00725 | 9.06E-08 | 4.91E-06 | -12.2244 |
| 242 | 0.03375 | 0.00825 | 1.03E-07 | 4.9E-06  | -12.2269 |
| 244 | 0.03325 | 0.00775 | 9.69E-08 | 4.9E-06  | -12.2256 |
| 246 | 0.03375 | 0.00825 | 1.03E-07 | 4.9E-06  | -12.2269 |
| 248 | 0.03425 | 0.00875 | 1.09E-07 | 4.89E-06 | -12.2282 |
| 250 | 0.03475 | 0.00975 | 1.22E-07 | 4.88E-06 | -12.2307 |
| 252 | 0.035   | 0.00925 | 1.16E-07 | 4.88E-06 | -12.2295 |
| 254 | 0.03425 | 0.0085  | 1.06E-07 | 4.89E-06 | -12.2276 |
| 256 | 0.03475 | 0.0085  | 1.06E-07 | 4.89E-06 | -12.2276 |
| 258 | 0.03475 | 0.0085  | 1.06E-07 | 4.89E-06 | -12.2276 |

|     |         |         |          |          |          |
|-----|---------|---------|----------|----------|----------|
| 260 | 0.03375 | 0.00725 | 9.06E-08 | 4.91E-06 | -12.2244 |
| 262 | 0.0345  | 0.00775 | 9.69E-08 | 4.9E-06  | -12.2256 |
| 264 | 0.0355  | 0.00925 | 1.16E-07 | 4.88E-06 | -12.2295 |
| 266 | 0.03375 | 0.00875 | 1.09E-07 | 4.89E-06 | -12.2282 |
| 268 | 0.035   | 0.00875 | 1.09E-07 | 4.89E-06 | -12.2282 |
| 270 | 0.03525 | 0.0095  | 1.19E-07 | 4.88E-06 | -12.2301 |
| 272 | 0.035   | 0.00825 | 1.03E-07 | 4.9E-06  | -12.2269 |
| 274 | 0.0355  | 0.0085  | 1.06E-07 | 4.89E-06 | -12.2276 |
| 276 | 0.035   | 0.00825 | 1.03E-07 | 4.9E-06  | -12.2269 |
| 278 | 0.03575 | 0.0095  | 1.19E-07 | 4.88E-06 | -12.2301 |
| 280 | 0.03625 | 0.00975 | 1.22E-07 | 4.88E-06 | -12.2307 |
| 282 | 0.03725 | 0.0115  | 1.44E-07 | 4.86E-06 | -12.2352 |
| 284 | 0.0365  | 0.00975 | 1.22E-07 | 4.88E-06 | -12.2307 |
| 286 | 0.03575 | 0.00975 | 1.22E-07 | 4.88E-06 | -12.2307 |
| 288 | 0.03625 | 0.009   | 1.13E-07 | 4.89E-06 | -12.2288 |
| 290 | 0.03725 | 0.0115  | 1.44E-07 | 4.86E-06 | -12.2352 |
| 292 | 0.03625 | 0.0105  | 1.31E-07 | 4.87E-06 | -12.2327 |
| 294 | 0.037   | 0.011   | 1.38E-07 | 4.86E-06 | -12.234  |
| 296 | 0.03625 | 0.0105  | 1.31E-07 | 4.87E-06 | -12.2327 |
| 298 | 0.03775 | 0.011   | 1.38E-07 | 4.86E-06 | -12.234  |

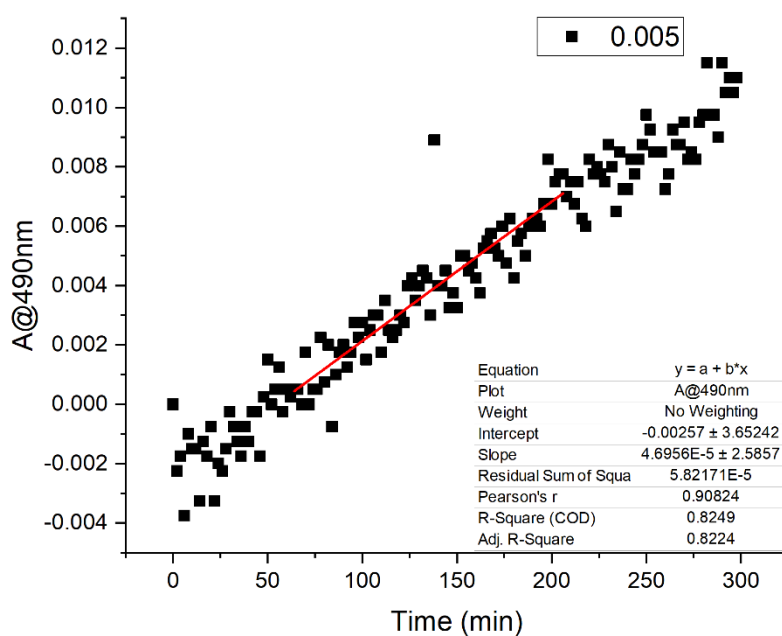

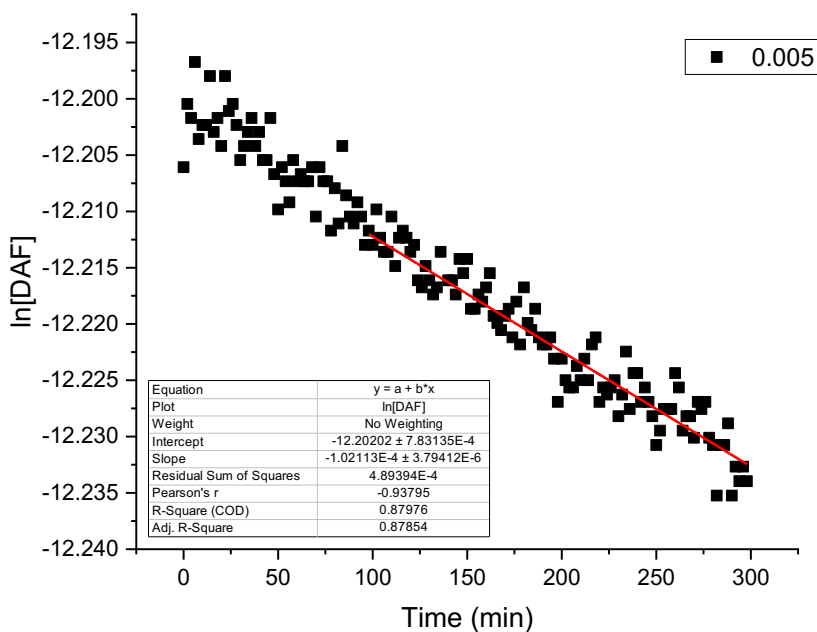

**0.010 mM DAF**

| Time (min) | A@490nm minus BK | set to 0  | [FLU] (M) | [DAF] (M) | ln[DAF]  |
|------------|------------------|-----------|-----------|-----------|----------|
| 0          | 0.0235           | 0         | 0         | 0.00001   | -11.5129 |
| 2          | 0.02425          | 5.00E-04  | 6.25E-09  | 9.99E-06  | -11.5136 |
| 4          | 0.02275          | -0.002    | -2.5E-08  | 1E-05     | -11.5104 |
| 6          | 0.023            | -0.00125  | -1.6E-08  | 1E-05     | -11.5114 |
| 8          | 0.0235           | -0.0015   | -1.9E-08  | 1E-05     | -11.5111 |
| 10         | 0.0225           | -0.002    | -2.5E-08  | 1E-05     | -11.5104 |
| 12         | 0.023            | -0.001    | -1.3E-08  | 1E-05     | -11.5117 |
| 14         | 0.02275          | -0.00125  | -1.6E-08  | 1E-05     | -11.5114 |
| 16         | 0.02375          | -0.0015   | -1.9E-08  | 1E-05     | -11.5111 |
| 18         | 0.02275          | -0.002    | -2.5E-08  | 1E-05     | -11.5104 |
| 20         | 0.0245           | -5.00E-04 | -6.3E-09  | 1E-05     | -11.5123 |
| 22         | 0.0245           | 0.00125   | 1.56E-08  | 9.98E-06  | -11.5145 |
| 24         | 0.02425          | 0.00125   | 1.56E-08  | 9.98E-06  | -11.5145 |
| 26         | 0.0255           | 0.001     | 1.25E-08  | 9.99E-06  | -11.5142 |
| 28         | 0.0245           | 5.00E-04  | 6.25E-09  | 9.99E-06  | -11.5136 |
| 30         | 0.02425          | 7.50E-04  | 9.38E-09  | 9.99E-06  | -11.5139 |
| 32         | 0.025            | 0.001     | 1.25E-08  | 9.99E-06  | -11.5142 |
| 34         | 0.02475          | 0.00125   | 1.56E-08  | 9.98E-06  | -11.5145 |
| 36         | 0.025            | 0.00175   | 2.19E-08  | 9.98E-06  | -11.5151 |
| 38         | 0.02575          | 0.00225   | 2.81E-08  | 9.97E-06  | -11.5157 |
| 40         | 0.02525          | 0.00175   | 2.19E-08  | 9.98E-06  | -11.5151 |
| 42         | 0.02575          | 0.0015    | 1.88E-08  | 9.98E-06  | -11.5148 |
| 44         | 0.026            | 0.0025    | 3.13E-08  | 9.97E-06  | -11.5161 |
| 46         | 0.0255           | 7.50E-04  | 9.38E-09  | 9.99E-06  | -11.5139 |
| 48         | 0.02675          | 0.00325   | 4.06E-08  | 9.96E-06  | -11.517  |

|     |         |         |          |          |          |
|-----|---------|---------|----------|----------|----------|
| 50  | 0.02675 | 0.00325 | 4.06E-08 | 9.96E-06 | -11.517  |
| 52  | 0.026   | 0.00375 | 4.69E-08 | 9.95E-06 | -11.5176 |
| 54  | 0.0265  | 0.0035  | 4.38E-08 | 9.96E-06 | -11.5173 |
| 56  | 0.0275  | 0.005   | 6.25E-08 | 9.94E-06 | -11.5192 |
| 58  | 0.0275  | 0.0035  | 4.38E-08 | 9.96E-06 | -11.5173 |
| 60  | 0.02675 | 0.00275 | 3.44E-08 | 9.97E-06 | -11.5164 |
| 62  | 0.02875 | 0.0055  | 6.88E-08 | 9.93E-06 | -11.5198 |
| 64  | 0.02875 | 0.005   | 6.25E-08 | 9.94E-06 | -11.5192 |
| 66  | 0.0285  | 0.00525 | 6.56E-08 | 9.93E-06 | -11.5195 |
| 68  | 0.02825 | 0.0035  | 4.38E-08 | 9.96E-06 | -11.5173 |
| 70  | 0.029   | 0.005   | 6.25E-08 | 9.94E-06 | -11.5192 |
| 72  | 0.0285  | 0.00425 | 5.31E-08 | 9.95E-06 | -11.5183 |
| 74  | 0.029   | 0.00575 | 7.19E-08 | 9.93E-06 | -11.5201 |
| 76  | 0.0295  | 0.00525 | 6.56E-08 | 9.93E-06 | -11.5195 |
| 78  | 0.03    | 0.006   | 7.5E-08  | 9.93E-06 | -11.5205 |
| 80  | 0.02925 | 0.00425 | 5.31E-08 | 9.95E-06 | -11.5183 |
| 82  | 0.03025 | 0.00725 | 9.06E-08 | 9.91E-06 | -11.522  |
| 84  | 0.02875 | 0.00425 | 5.31E-08 | 9.95E-06 | -11.5183 |
| 86  | 0.03125 | 0.00675 | 8.44E-08 | 9.92E-06 | -11.5214 |
| 88  | 0.03    | 0.00625 | 7.81E-08 | 9.92E-06 | -11.5208 |
| 90  | 0.03125 | 0.0075  | 9.38E-08 | 9.91E-06 | -11.5223 |
| 92  | 0.03175 | 0.0075  | 9.38E-08 | 9.91E-06 | -11.5223 |
| 94  | 0.03075 | 0.007   | 8.75E-08 | 9.91E-06 | -11.5217 |
| 96  | 0.032   | 0.0075  | 9.38E-08 | 9.91E-06 | -11.5223 |
| 98  | 0.03225 | 0.00725 | 9.06E-08 | 9.91E-06 | -11.522  |
| 100 | 0.0315  | 0.007   | 8.75E-08 | 9.91E-06 | -11.5217 |
| 102 | 0.03225 | 0.0075  | 9.38E-08 | 9.91E-06 | -11.5223 |
| 104 | 0.03175 | 0.0075  | 9.38E-08 | 9.91E-06 | -11.5223 |
| 106 | 0.0325  | 0.008   | 1E-07    | 9.9E-06  | -11.523  |
| 108 | 0.0325  | 0.00825 | 1.03E-07 | 9.9E-06  | -11.5233 |
| 110 | 0.03275 | 0.00725 | 9.06E-08 | 9.91E-06 | -11.522  |
| 112 | 0.0335  | 0.0095  | 1.19E-07 | 9.88E-06 | -11.5249 |
| 114 | 0.034   | 0.009   | 1.13E-07 | 9.89E-06 | -11.5242 |
| 116 | 0.0325  | 0.0075  | 9.38E-08 | 9.91E-06 | -11.5223 |
| 118 | 0.0335  | 0.0085  | 1.06E-07 | 9.89E-06 | -11.5236 |
| 120 | 0.03425 | 0.0075  | 9.38E-08 | 9.91E-06 | -11.5223 |
| 122 | 0.0345  | 0.00975 | 1.22E-07 | 9.88E-06 | -11.5252 |
| 124 | 0.035   | 0.01125 | 1.41E-07 | 9.86E-06 | -11.5271 |
| 126 | 0.0355  | 0.00825 | 1.03E-07 | 9.9E-06  | -11.5233 |
| 128 | 0.03525 | 0.01075 | 1.34E-07 | 9.87E-06 | -11.5265 |
| 130 | 0.0365  | 0.0115  | 1.44E-07 | 9.86E-06 | -11.5274 |
| 132 | 0.0365  | 0.01275 | 1.59E-07 | 9.84E-06 | -11.529  |
| 134 | 0.03575 | 0.011   | 1.38E-07 | 9.86E-06 | -11.5268 |
| 136 | 0.035   | 0.0095  | 1.19E-07 | 9.88E-06 | -11.5249 |
| 138 | 0.0365  | 0.01523 | 1.9E-07  | 9.81E-06 | -11.5321 |
| 140 | 0.0355  | 0.008   | 1E-07    | 9.9E-06  | -11.523  |

|     |         |         |          |          |          |
|-----|---------|---------|----------|----------|----------|
| 142 | 0.037   | 0.0125  | 1.56E-07 | 9.84E-06 | -11.5287 |
| 144 | 0.037   | 0.012   | 1.5E-07  | 9.85E-06 | -11.528  |
| 146 | 0.03675 | 0.0115  | 1.44E-07 | 9.86E-06 | -11.5274 |
| 148 | 0.03725 | 0.01225 | 1.53E-07 | 9.85E-06 | -11.5284 |
| 150 | 0.03725 | 0.0125  | 1.56E-07 | 9.84E-06 | -11.5287 |
| 152 | 0.038   | 0.01225 | 1.53E-07 | 9.85E-06 | -11.5284 |
| 154 | 0.038   | 0.0115  | 1.44E-07 | 9.86E-06 | -11.5274 |
| 156 | 0.0375  | 0.01225 | 1.53E-07 | 9.85E-06 | -11.5284 |
| 158 | 0.03825 | 0.013   | 1.63E-07 | 9.84E-06 | -11.5293 |
| 160 | 0.0385  | 0.013   | 1.63E-07 | 9.84E-06 | -11.5293 |
| 162 | 0.03775 | 0.01225 | 1.53E-07 | 9.85E-06 | -11.5284 |
| 164 | 0.039   | 0.01425 | 1.78E-07 | 9.82E-06 | -11.5309 |
| 166 | 0.03825 | 0.0135  | 1.69E-07 | 9.83E-06 | -11.5299 |
| 168 | 0.0395  | 0.0145  | 1.81E-07 | 9.82E-06 | -11.5312 |
| 170 | 0.039   | 0.014   | 1.75E-07 | 9.83E-06 | -11.5306 |
| 172 | 0.0395  | 0.015   | 1.88E-07 | 9.81E-06 | -11.5319 |
| 174 | 0.04    | 0.01475 | 1.84E-07 | 9.82E-06 | -11.5315 |
| 176 | 0.03975 | 0.01375 | 1.72E-07 | 9.83E-06 | -11.5303 |
| 178 | 0.04025 | 0.016   | 2E-07    | 9.8E-06  | -11.5331 |
| 180 | 0.03825 | 0.01325 | 1.66E-07 | 9.83E-06 | -11.5296 |
| 182 | 0.04025 | 0.01475 | 1.84E-07 | 9.82E-06 | -11.5315 |
| 184 | 0.0405  | 0.01525 | 1.91E-07 | 9.81E-06 | -11.5322 |
| 186 | 0.04025 | 0.01475 | 1.84E-07 | 9.82E-06 | -11.5315 |
| 188 | 0.04075 | 0.01525 | 1.91E-07 | 9.81E-06 | -11.5322 |
| 190 | 0.04025 | 0.01575 | 1.97E-07 | 9.8E-06  | -11.5328 |
| 192 | 0.04175 | 0.01625 | 2.03E-07 | 9.8E-06  | -11.5334 |
| 194 | 0.0415  | 0.01575 | 1.97E-07 | 9.8E-06  | -11.5328 |
| 196 | 0.0415  | 0.016   | 2E-07    | 9.8E-06  | -11.5331 |
| 198 | 0.043   | 0.01825 | 2.28E-07 | 9.77E-06 | -11.536  |
| 200 | 0.043   | 0.01875 | 2.34E-07 | 9.77E-06 | -11.5366 |
| 202 | 0.04325 | 0.01775 | 2.22E-07 | 9.78E-06 | -11.5354 |
| 204 | 0.0425  | 0.017   | 2.13E-07 | 9.79E-06 | -11.5344 |
| 206 | 0.04225 | 0.0165  | 2.06E-07 | 9.79E-06 | -11.5338 |
| 208 | 0.0425  | 0.0175  | 2.19E-07 | 9.78E-06 | -11.535  |
| 210 | 0.0425  | 0.01725 | 2.16E-07 | 9.78E-06 | -11.5347 |
| 212 | 0.043   | 0.01625 | 2.03E-07 | 9.8E-06  | -11.5334 |
| 214 | 0.0435  | 0.018   | 2.25E-07 | 9.78E-06 | -11.5357 |
| 216 | 0.04375 | 0.01775 | 2.22E-07 | 9.78E-06 | -11.5354 |
| 218 | 0.0435  | 0.01725 | 2.16E-07 | 9.78E-06 | -11.5347 |
| 220 | 0.0445  | 0.019   | 2.38E-07 | 9.76E-06 | -11.537  |
| 222 | 0.045   | 0.019   | 2.38E-07 | 9.76E-06 | -11.537  |
| 224 | 0.04425 | 0.019   | 2.38E-07 | 9.76E-06 | -11.537  |
| 226 | 0.04525 | 0.01975 | 2.47E-07 | 9.75E-06 | -11.5379 |
| 228 | 0.0445  | 0.0185  | 2.31E-07 | 9.77E-06 | -11.5363 |
| 230 | 0.04475 | 0.0195  | 2.44E-07 | 9.76E-06 | -11.5376 |
| 232 | 0.0455  | 0.019   | 2.38E-07 | 9.76E-06 | -11.537  |



|     |         |         |          |          |          |
|-----|---------|---------|----------|----------|----------|
| 234 | 0.04525 | 0.01925 | 2.41E-07 | 9.76E-06 | -11.5373 |
| 236 | 0.04575 | 0.02075 | 2.59E-07 | 9.74E-06 | -11.5392 |
| 238 | 0.04425 | 0.01825 | 2.28E-07 | 9.77E-06 | -11.536  |
| 240 | 0.04625 | 0.02    | 2.5E-07  | 9.75E-06 | -11.5382 |
| 242 | 0.046   | 0.0195  | 2.44E-07 | 9.76E-06 | -11.5376 |
| 244 | 0.0455  | 0.01975 | 2.47E-07 | 9.75E-06 | -11.5379 |
| 246 | 0.04625 | 0.02075 | 2.59E-07 | 9.74E-06 | -11.5392 |
| 248 | 0.04625 | 0.02    | 2.5E-07  | 9.75E-06 | -11.5382 |
| 250 | 0.04625 | 0.021   | 2.63E-07 | 9.74E-06 | -11.5395 |
| 252 | 0.04675 | 0.02075 | 2.59E-07 | 9.74E-06 | -11.5392 |
| 254 | 0.0465  | 0.0205  | 2.56E-07 | 9.74E-06 | -11.5389 |
| 256 | 0.0465  | 0.02    | 2.5E-07  | 9.75E-06 | -11.5382 |
| 258 | 0.0475  | 0.021   | 2.63E-07 | 9.74E-06 | -11.5395 |
| 260 | 0.047   | 0.02125 | 2.66E-07 | 9.73E-06 | -11.5398 |
| 262 | 0.0465  | 0.01925 | 2.41E-07 | 9.76E-06 | -11.5373 |
| 264 | 0.0485  | 0.0225  | 2.81E-07 | 9.72E-06 | -11.5415 |
| 266 | 0.047   | 0.021   | 2.63E-07 | 9.74E-06 | -11.5395 |
| 268 | 0.04775 | 0.02125 | 2.66E-07 | 9.73E-06 | -11.5398 |
| 270 | 0.04775 | 0.0215  | 2.69E-07 | 9.73E-06 | -11.5402 |
| 272 | 0.048   | 0.021   | 2.63E-07 | 9.74E-06 | -11.5395 |
| 274 | 0.0475  | 0.02    | 2.5E-07  | 9.75E-06 | -11.5382 |
| 276 | 0.04775 | 0.02125 | 2.66E-07 | 9.73E-06 | -11.5398 |
| 278 | 0.04825 | 0.0215  | 2.69E-07 | 9.73E-06 | -11.5402 |
| 280 | 0.04825 | 0.02175 | 2.72E-07 | 9.73E-06 | -11.5405 |
| 282 | 0.0495  | 0.023   | 2.88E-07 | 9.71E-06 | -11.5421 |
| 284 | 0.04875 | 0.02225 | 2.78E-07 | 9.72E-06 | -11.5411 |
| 286 | 0.04875 | 0.02225 | 2.78E-07 | 9.72E-06 | -11.5411 |
| 288 | 0.04875 | 0.02175 | 2.72E-07 | 9.73E-06 | -11.5405 |
| 290 | 0.04925 | 0.023   | 2.88E-07 | 9.71E-06 | -11.5421 |
| 292 | 0.04925 | 0.023   | 2.88E-07 | 9.71E-06 | -11.5421 |
| 294 | 0.04975 | 0.0225  | 2.81E-07 | 9.72E-06 | -11.5415 |
| 296 | 0.04925 | 0.0235  | 2.94E-07 | 9.71E-06 | -11.5427 |
| 298 | 0.05    | 0.023   | 2.88E-07 | 9.71E-06 | -11.5421 |

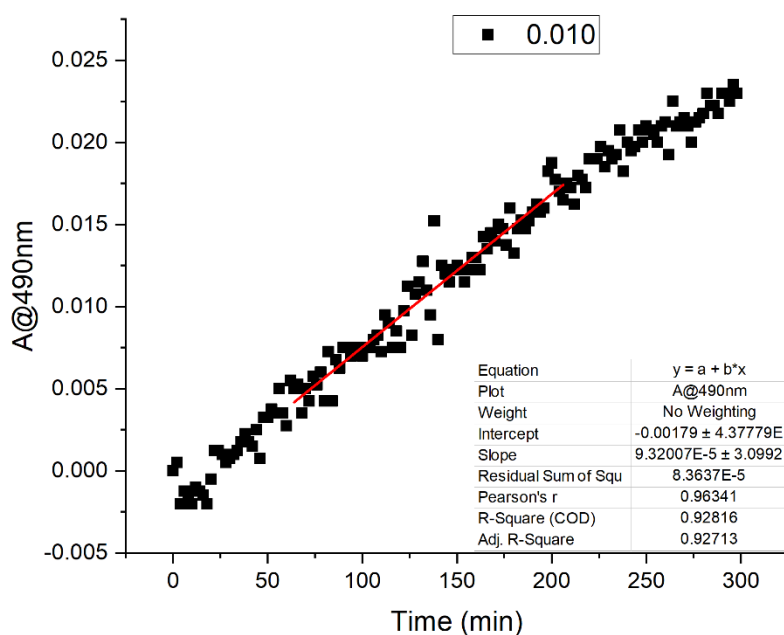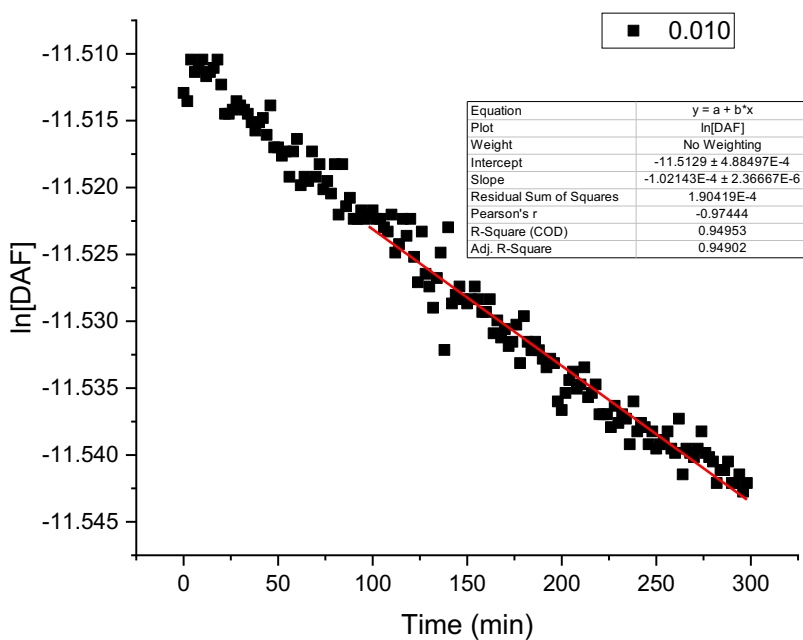

**0.015 mM DAF**

| Time (min) | A@490nm minus BK | set to 0  | [FLU] (M) | [DAF] (M) | ln[DAF]  |
|------------|------------------|-----------|-----------|-----------|----------|
| 0          | 0.02275          | 0         | 0         | 0.000015  | -11.1075 |
| 2          | 0.0225           | 5.00E-04  | 6.25E-09  | 1.5E-05   | -11.1079 |
| 4          | 0.0225           | -2.50E-04 | -3.1E-09  | 1.5E-05   | -11.1073 |
| 6          | 0.023            | 0.001     | 1.25E-08  | 1.5E-05   | -11.1083 |
| 8          | 0.023            | -0.00175  | -2.2E-08  | 1.5E-05   | -11.106  |
| 10         | 0.02225          | -5.00E-04 | -6.3E-09  | 1.5E-05   | -11.107  |

|     |         |           |          |          |          |
|-----|---------|-----------|----------|----------|----------|
| 12  | 0.02275 | 0         | 0        | 0.000015 | -11.1075 |
| 14  | 0.022   | -0.001    | -1.3E-08 | 1.5E-05  | -11.1066 |
| 16  | 0.02425 | 0.00225   | 2.81E-08 | 1.5E-05  | -11.1093 |
| 18  | 0.02275 | -7.50E-04 | -9.4E-09 | 1.5E-05  | -11.1068 |
| 20  | 0.024   | -5.00E-04 | -6.3E-09 | 1.5E-05  | -11.107  |
| 22  | 0.02375 | 0.0015    | 1.88E-08 | 1.5E-05  | -11.1087 |
| 24  | 0.0235  | 0.00225   | 2.81E-08 | 1.5E-05  | -11.1093 |
| 26  | 0.02475 | 0.00125   | 1.56E-08 | 1.5E-05  | -11.1085 |
| 28  | 0.02425 | 0.0015    | 1.88E-08 | 1.5E-05  | -11.1087 |
| 30  | 0.02425 | 0.0015    | 1.88E-08 | 1.5E-05  | -11.1087 |
| 32  | 0.025   | 0.00225   | 2.81E-08 | 1.5E-05  | -11.1093 |
| 34  | 0.02525 | 0.003     | 3.75E-08 | 1.5E-05  | -11.11   |
| 36  | 0.0245  | 0.00125   | 1.56E-08 | 1.5E-05  | -11.1085 |
| 38  | 0.0255  | 0.0025    | 3.13E-08 | 1.5E-05  | -11.1095 |
| 40  | 0.0255  | 0.003     | 3.75E-08 | 1.5E-05  | -11.11   |
| 42  | 0.026   | 0.003     | 3.75E-08 | 1.5E-05  | -11.11   |
| 44  | 0.0265  | 0.0035    | 4.38E-08 | 1.5E-05  | -11.1104 |
| 46  | 0.026   | 0.0025    | 3.13E-08 | 1.5E-05  | -11.1095 |
| 48  | 0.027   | 0.00375   | 4.69E-08 | 1.5E-05  | -11.1106 |
| 50  | 0.0285  | 0.00475   | 5.94E-08 | 1.49E-05 | -11.1114 |
| 52  | 0.02625 | 0.00575   | 7.19E-08 | 1.49E-05 | -11.1123 |
| 54  | 0.02775 | 0.00475   | 5.94E-08 | 1.49E-05 | -11.1114 |
| 56  | 0.0285  | 0.0065    | 8.13E-08 | 1.49E-05 | -11.1129 |
| 58  | 0.02875 | 0.0055    | 6.88E-08 | 1.49E-05 | -11.1121 |
| 60  | 0.0285  | 0.0055    | 6.88E-08 | 1.49E-05 | -11.1121 |
| 62  | 0.02875 | 0.006     | 7.5E-08  | 1.49E-05 | -11.1125 |
| 64  | 0.02925 | 0.006     | 7.5E-08  | 1.49E-05 | -11.1125 |
| 66  | 0.029   | 0.0055    | 6.88E-08 | 1.49E-05 | -11.1121 |
| 68  | 0.02975 | 0.0065    | 8.13E-08 | 1.49E-05 | -11.1129 |
| 70  | 0.0305  | 0.00775   | 9.69E-08 | 1.49E-05 | -11.1139 |
| 72  | 0.03    | 0.0065    | 8.13E-08 | 1.49E-05 | -11.1129 |
| 74  | 0.031   | 0.0085    | 1.06E-07 | 1.49E-05 | -11.1146 |
| 76  | 0.03    | 0.007     | 8.75E-08 | 1.49E-05 | -11.1133 |
| 78  | 0.031   | 0.0075    | 9.38E-08 | 1.49E-05 | -11.1137 |
| 80  | 0.031   | 0.00625   | 7.81E-08 | 1.49E-05 | -11.1127 |
| 82  | 0.03175 | 0.00975   | 1.22E-07 | 1.49E-05 | -11.1156 |
| 84  | 0.0305  | 0.00725   | 9.06E-08 | 1.49E-05 | -11.1135 |
| 86  | 0.033   | 0.009     | 1.13E-07 | 1.49E-05 | -11.1115 |
| 88  | 0.03325 | 0.01025   | 1.28E-07 | 1.49E-05 | -11.1116 |
| 90  | 0.0335  | 0.0115    | 1.44E-07 | 1.49E-05 | -11.1171 |
| 92  | 0.0335  | 0.01      | 1.25E-07 | 1.49E-05 | -11.1158 |
| 94  | 0.03325 | 0.0095    | 1.19E-07 | 1.49E-05 | -11.1154 |
| 96  | 0.034   | 0.01125   | 1.41E-07 | 1.49E-05 | -11.1169 |
| 98  | 0.03475 | 0.01025   | 1.28E-07 | 1.49E-05 | -11.1116 |
| 100 | 0.034   | 0.011     | 1.38E-07 | 1.49E-05 | -11.1167 |
| 102 | 0.035   | 0.01175   | 1.47E-07 | 1.49E-05 | -11.1173 |

|     |         |         |          |          |          |
|-----|---------|---------|----------|----------|----------|
| 104 | 0.035   | 0.011   | 1.38E-07 | 1.49E-05 | -11.1167 |
| 106 | 0.03575 | 0.01275 | 1.59E-07 | 1.48E-05 | -11.1181 |
| 108 | 0.03575 | 0.01175 | 1.47E-07 | 1.49E-05 | -11.1173 |
| 110 | 0.03525 | 0.011   | 1.38E-07 | 1.49E-05 | -11.1167 |
| 112 | 0.036   | 0.0125  | 1.56E-07 | 1.48E-05 | -11.1179 |
| 114 | 0.03675 | 0.0135  | 1.69E-07 | 1.48E-05 | -11.1188 |
| 116 | 0.03625 | 0.01275 | 1.59E-07 | 1.48E-05 | -11.1181 |
| 118 | 0.03725 | 0.013   | 1.63E-07 | 1.48E-05 | -11.1184 |
| 120 | 0.03775 | 0.01475 | 1.84E-07 | 1.48E-05 | -11.1198 |
| 122 | 0.03825 | 0.01475 | 1.84E-07 | 1.48E-05 | -11.1198 |
| 124 | 0.03875 | 0.016   | 2E-07    | 1.48E-05 | -11.1209 |
| 126 | 0.03925 | 0.0155  | 1.94E-07 | 1.48E-05 | -11.1205 |
| 128 | 0.0385  | 0.015   | 1.88E-07 | 1.48E-05 | -11.12   |
| 130 | 0.04025 | 0.016   | 2E-07    | 1.48E-05 | -11.1209 |
| 132 | 0.04025 | 0.0175  | 2.19E-07 | 1.48E-05 | -11.1222 |
| 134 | 0.0405  | 0.017   | 2.13E-07 | 1.48E-05 | -11.1217 |
| 136 | 0.0405  | 0.01575 | 1.97E-07 | 1.48E-05 | -11.1207 |
| 138 | 0.0405  | 0.02025 | 2.53E-07 | 1.47E-05 | -11.1245 |
| 140 | 0.04025 | 0.0165  | 2.06E-07 | 1.48E-05 | -11.1213 |
| 142 | 0.04175 | 0.01775 | 2.22E-07 | 1.48E-05 | -11.1224 |
| 144 | 0.04175 | 0.01775 | 2.22E-07 | 1.48E-05 | -11.1224 |
| 146 | 0.04175 | 0.017   | 2.13E-07 | 1.48E-05 | -11.1217 |
| 148 | 0.042   | 0.017   | 2.13E-07 | 1.48E-05 | -11.1217 |
| 150 | 0.04225 | 0.01775 | 2.22E-07 | 1.48E-05 | -11.1224 |
| 152 | 0.04275 | 0.019   | 2.38E-07 | 1.48E-05 | -11.1234 |
| 154 | 0.04275 | 0.0175  | 2.19E-07 | 1.48E-05 | -11.1222 |
| 156 | 0.04325 | 0.019   | 2.38E-07 | 1.48E-05 | -11.1234 |
| 158 | 0.04375 | 0.0195  | 2.44E-07 | 1.48E-05 | -11.1238 |
| 160 | 0.044   | 0.01925 | 2.41E-07 | 1.48E-05 | -11.1236 |
| 162 | 0.04325 | 0.019   | 2.38E-07 | 1.48E-05 | -11.1234 |
| 164 | 0.044   | 0.02025 | 2.53E-07 | 1.47E-05 | -11.1245 |
| 166 | 0.04475 | 0.0205  | 2.56E-07 | 1.47E-05 | -11.1247 |
| 168 | 0.04475 | 0.02125 | 2.66E-07 | 1.47E-05 | -11.1253 |
| 170 | 0.04525 | 0.02125 | 2.66E-07 | 1.47E-05 | -11.1253 |
| 172 | 0.04475 | 0.021   | 2.63E-07 | 1.47E-05 | -11.1251 |
| 174 | 0.04575 | 0.0215  | 2.69E-07 | 1.47E-05 | -11.1255 |
| 176 | 0.046   | 0.02075 | 2.59E-07 | 1.47E-05 | -11.1249 |
| 178 | 0.04625 | 0.02225 | 2.78E-07 | 1.47E-05 | -11.1262 |
| 180 | 0.0445  | 0.02075 | 2.59E-07 | 1.47E-05 | -11.1249 |
| 182 | 0.04675 | 0.02225 | 2.78E-07 | 1.47E-05 | -11.1262 |
| 184 | 0.04725 | 0.023   | 2.88E-07 | 1.47E-05 | -11.1268 |
| 186 | 0.0475  | 0.023   | 2.88E-07 | 1.47E-05 | -11.1268 |
| 188 | 0.047   | 0.022   | 2.75E-07 | 1.47E-05 | -11.126  |
| 190 | 0.04825 | 0.024   | 3E-07    | 1.47E-05 | -11.1277 |
| 192 | 0.0485  | 0.02375 | 2.97E-07 | 1.47E-05 | -11.1275 |
| 194 | 0.049   | 0.02425 | 3.03E-07 | 1.47E-05 | -11.1279 |

|     |         |         |          |          |          |
|-----|---------|---------|----------|----------|----------|
| 196 | 0.049   | 0.02475 | 3.09E-07 | 1.47E-05 | -11.1283 |
| 198 | 0.0495  | 0.026   | 3.25E-07 | 1.47E-05 | -11.1294 |
| 200 | 0.04925 | 0.02475 | 3.09E-07 | 1.47E-05 | -11.1283 |
| 202 | 0.05    | 0.02575 | 3.22E-07 | 1.47E-05 | -11.1292 |
| 204 | 0.05025 | 0.0265  | 3.31E-07 | 1.47E-05 | -11.1298 |
| 206 | 0.05025 | 0.0255  | 3.19E-07 | 1.47E-05 | -11.1289 |
| 208 | 0.05025 | 0.026   | 3.25E-07 | 1.47E-05 | -11.1294 |
| 210 | 0.04975 | 0.02525 | 3.16E-07 | 1.47E-05 | -11.1287 |
| 212 | 0.051   | 0.026   | 3.25E-07 | 1.47E-05 | -11.1294 |
| 214 | 0.051   | 0.0265  | 3.31E-07 | 1.47E-05 | -11.1298 |
| 216 | 0.052   | 0.027   | 3.38E-07 | 1.47E-05 | -11.1302 |
| 218 | 0.05125 | 0.02525 | 3.16E-07 | 1.47E-05 | -11.1287 |
| 220 | 0.0525  | 0.02825 | 3.53E-07 | 1.46E-05 | -11.1313 |
| 222 | 0.053   | 0.02825 | 3.53E-07 | 1.46E-05 | -11.1313 |
| 224 | 0.052   | 0.028   | 3.5E-07  | 1.47E-05 | -11.1311 |
| 226 | 0.0535  | 0.0295  | 3.69E-07 | 1.46E-05 | -11.1324 |
| 228 | 0.0525  | 0.028   | 3.5E-07  | 1.47E-05 | -11.1311 |
| 230 | 0.0535  | 0.029   | 3.63E-07 | 1.46E-05 | -11.1319 |
| 232 | 0.05375 | 0.029   | 3.63E-07 | 1.46E-05 | -11.1319 |
| 234 | 0.05275 | 0.028   | 3.5E-07  | 1.47E-05 | -11.1311 |
| 236 | 0.05375 | 0.0295  | 3.69E-07 | 1.46E-05 | -11.1324 |
| 238 | 0.05325 | 0.028   | 3.5E-07  | 1.47E-05 | -11.1311 |
| 240 | 0.05325 | 0.02775 | 3.47E-07 | 1.47E-05 | -11.1309 |
| 242 | 0.05425 | 0.02925 | 3.66E-07 | 1.46E-05 | -11.1321 |
| 244 | 0.0535  | 0.02825 | 3.53E-07 | 1.46E-05 | -11.1313 |
| 246 | 0.05575 | 0.03175 | 3.97E-07 | 1.46E-05 | -11.1343 |
| 248 | 0.05475 | 0.02975 | 3.72E-07 | 1.46E-05 | -11.1326 |
| 250 | 0.0555  | 0.03025 | 3.78E-07 | 1.46E-05 | -11.133  |
| 252 | 0.05575 | 0.03    | 3.75E-07 | 1.46E-05 | -11.1328 |
| 254 | 0.0555  | 0.03125 | 3.91E-07 | 1.46E-05 | -11.1338 |
| 256 | 0.05575 | 0.03025 | 3.78E-07 | 1.46E-05 | -11.133  |
| 258 | 0.05525 | 0.02975 | 3.72E-07 | 1.46E-05 | -11.1326 |
| 260 | 0.056   | 0.0305  | 3.81E-07 | 1.46E-05 | -11.1332 |
| 262 | 0.05575 | 0.02975 | 3.72E-07 | 1.46E-05 | -11.1326 |
| 264 | 0.05775 | 0.03225 | 4.03E-07 | 1.46E-05 | -11.1347 |
| 266 | 0.05575 | 0.0305  | 3.81E-07 | 1.46E-05 | -11.1332 |
| 268 | 0.058   | 0.0325  | 4.06E-07 | 1.46E-05 | -11.1349 |
| 270 | 0.05775 | 0.03275 | 4.09E-07 | 1.46E-05 | -11.1351 |
| 272 | 0.05775 | 0.032   | 4E-07    | 1.46E-05 | -11.1345 |
| 274 | 0.05875 | 0.032   | 4E-07    | 1.46E-05 | -11.1345 |
| 276 | 0.05825 | 0.0325  | 4.06E-07 | 1.46E-05 | -11.1349 |
| 278 | 0.0585  | 0.03325 | 4.16E-07 | 1.46E-05 | -11.1356 |
| 280 | 0.0595  | 0.0335  | 4.19E-07 | 1.46E-05 | -11.1358 |
| 282 | 0.0605  | 0.03525 | 4.41E-07 | 1.46E-05 | -11.1373 |
| 284 | 0.059   | 0.03275 | 4.09E-07 | 1.46E-05 | -11.1351 |
| 286 | 0.0595  | 0.03375 | 4.22E-07 | 1.46E-05 | -11.136  |

|     |         |         |          |          |          |
|-----|---------|---------|----------|----------|----------|
| 288 | 0.059   | 0.033   | 4.13E-07 | 1.46E-05 | -11.1353 |
| 290 | 0.05975 | 0.034   | 4.25E-07 | 1.46E-05 | -11.1362 |
| 292 | 0.0595  | 0.0335  | 4.19E-07 | 1.46E-05 | -11.1358 |
| 294 | 0.06    | 0.034   | 4.25E-07 | 1.46E-05 | -11.1362 |
| 296 | 0.06    | 0.0345  | 4.31E-07 | 1.46E-05 | -11.1366 |
| 298 | 0.061   | 0.03475 | 4.34E-07 | 1.46E-05 | -11.1368 |

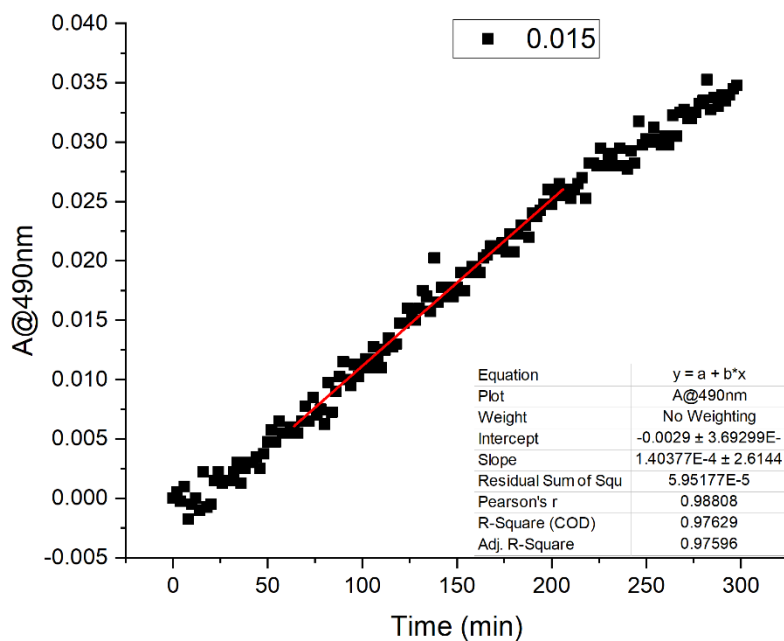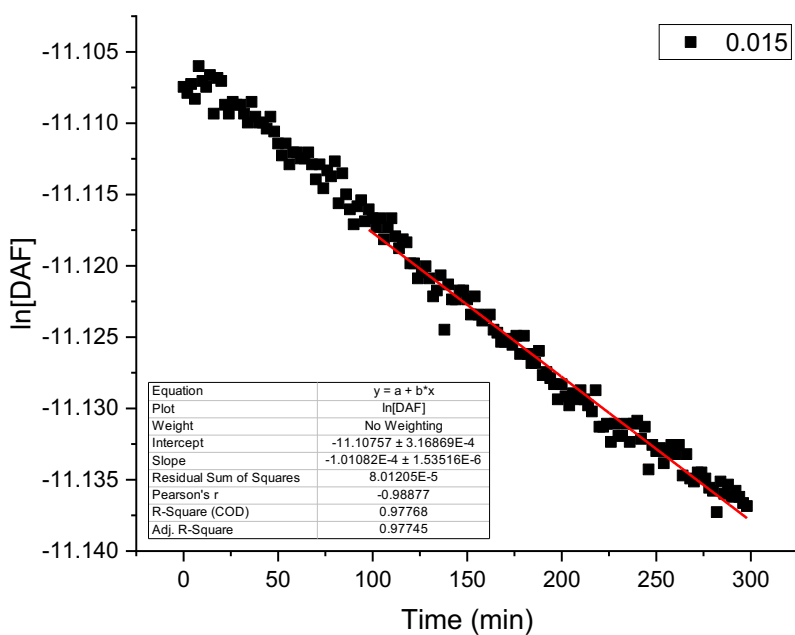

## 0.020 mM DAF

| Time (min) | A@490nm minus BK | set to 0  | [FLU] (M) | [DAF] (M) | ln[DAF]  |
|------------|------------------|-----------|-----------|-----------|----------|
| 0          | 0.022            | 0         | 0         | 0.00002   | -10.8198 |
| 2          | 0.02275          | 7.50E-04  | 9.38E-09  | 2E-05     | -10.8202 |
| 4          | 0.02225          | 0         | 0         | 0.00002   | -10.8198 |
| 6          | 0.02325          | 0.0015    | 1.88E-08  | 2E-05     | -10.8207 |
| 8          | 0.02225          | 0         | 0         | 0.00002   | -10.8198 |
| 10         | 0.0225           | 0         | 0         | 0.00002   | -10.8198 |
| 12         | 0.0225           | 2.50E-04  | 3.13E-09  | 2E-05     | -10.8199 |
| 14         | 0.0225           | -5.00E-04 | -6.3E-09  | 2E-05     | -10.8195 |
| 16         | 0.024            | 0.0015    | 1.88E-08  | 2E-05     | -10.8207 |
| 18         | 0.02275          | 5.00E-04  | 6.25E-09  | 2E-05     | -10.8201 |
| 20         | 0.024            | 7.50E-04  | 9.38E-09  | 2E-05     | -10.8202 |
| 22         | 0.024            | 0.002     | 2.5E-08   | 2E-05     | -10.821  |
| 24         | 0.024            | 0.00175   | 2.19E-08  | 2E-05     | -10.8209 |
| 26         | 0.02525          | 0.00175   | 2.19E-08  | 2E-05     | -10.8209 |
| 28         | 0.02525          | 0.00275   | 3.44E-08  | 2E-05     | -10.8215 |
| 30         | 0.0245           | 0.002     | 2.5E-08   | 2E-05     | -10.821  |
| 32         | 0.02475          | 0.00175   | 2.19E-08  | 2E-05     | -10.8209 |
| 34         | 0.02525          | 0.004     | 5E-08     | 2E-05     | -10.8223 |
| 36         | 0.02525          | 0.00225   | 2.81E-08  | 2E-05     | -10.8212 |
| 38         | 0.0255           | 0.0035    | 4.38E-08  | 2E-05     | -10.822  |
| 40         | 0.0255           | 0.00325   | 4.06E-08  | 2E-05     | -10.8218 |
| 42         | 0.02675          | 0.00475   | 5.94E-08  | 1.99E-05  | -10.8228 |
| 44         | 0.02625          | 0.0035    | 4.38E-08  | 2E-05     | -10.822  |
| 46         | 0.02625          | 0.00325   | 4.06E-08  | 2E-05     | -10.8218 |
| 48         | 0.02825          | 0.00625   | 7.81E-08  | 1.99E-05  | -10.8237 |
| 50         | 0.02875          | 0.00675   | 8.44E-08  | 1.99E-05  | -10.824  |
| 52         | 0.0275           | 0.00675   | 8.44E-08  | 1.99E-05  | -10.824  |
| 54         | 0.0285           | 0.005     | 6.25E-08  | 1.99E-05  | -10.8229 |
| 56         | 0.02925          | 0.007     | 8.75E-08  | 1.99E-05  | -10.8242 |
| 58         | 0.029            | 0.0055    | 6.88E-08  | 1.99E-05  | -10.8232 |
| 60         | 0.02925          | 0.0055    | 6.88E-08  | 1.99E-05  | -10.8232 |
| 62         | 0.0295           | 0.0065    | 8.13E-08  | 1.99E-05  | -10.8238 |
| 64         | 0.0305           | 0.0075    | 9.38E-08  | 1.99E-05  | -10.8245 |
| 66         | 0.031            | 0.008     | 1E-07     | 1.99E-05  | -10.8248 |
| 68         | 0.0315           | 0.00825   | 1.03E-07  | 1.99E-05  | -10.8249 |
| 70         | 0.0315           | 0.009     | 1.13E-07  | 1.99E-05  | -10.8254 |
| 72         | 0.03225          | 0.0095    | 1.19E-07  | 1.99E-05  | -10.8257 |
| 74         | 0.03175          | 0.0095    | 1.19E-07  | 1.99E-05  | -10.8257 |
| 76         | 0.03275          | 0.01      | 1.25E-07  | 1.99E-05  | -10.826  |
| 78         | 0.0335           | 0.0105    | 1.31E-07  | 1.99E-05  | -10.8264 |
| 80         | 0.0335           | 0.01125   | 1.41E-07  | 1.99E-05  | -10.8268 |
| 82         | 0.03375          | 0.01225   | 1.53E-07  | 1.98E-05  | -10.8275 |
| 84         | 0.032            | 0.00875   | 1.09E-07  | 1.99E-05  | -10.8253 |
| 86         | 0.03525          | 0.01275   | 1.59E-07  | 1.98E-05  | -10.8278 |

|     |         |         |          |          |          |
|-----|---------|---------|----------|----------|----------|
| 88  | 0.035   | 0.013   | 1.63E-07 | 1.98E-05 | -10.8279 |
| 90  | 0.03575 | 0.01475 | 1.84E-07 | 1.98E-05 | -10.829  |
| 92  | 0.0365  | 0.01325 | 1.66E-07 | 1.98E-05 | -10.8281 |
| 94  | 0.03625 | 0.01375 | 1.72E-07 | 1.98E-05 | -10.8284 |
| 96  | 0.03725 | 0.01475 | 1.84E-07 | 1.98E-05 | -10.829  |
| 98  | 0.03775 | 0.0155  | 1.94E-07 | 1.98E-05 | -10.8295 |
| 100 | 0.03675 | 0.014   | 1.75E-07 | 1.98E-05 | -10.8286 |
| 102 | 0.038   | 0.015   | 1.88E-07 | 1.98E-05 | -10.8292 |
| 104 | 0.03775 | 0.01425 | 1.78E-07 | 1.98E-05 | -10.8287 |
| 106 | 0.03925 | 0.0165  | 2.06E-07 | 1.98E-05 | -10.8301 |
| 108 | 0.0395  | 0.01675 | 2.09E-07 | 1.98E-05 | -10.8303 |
| 110 | 0.039   | 0.01525 | 1.91E-07 | 1.98E-05 | -10.8294 |
| 112 | 0.04025 | 0.01725 | 2.16E-07 | 1.98E-05 | -10.8306 |
| 114 | 0.04075 | 0.0175  | 2.19E-07 | 1.98E-05 | -10.8308 |
| 116 | 0.041   | 0.018   | 2.25E-07 | 1.98E-05 | -10.8311 |
| 118 | 0.04125 | 0.018   | 2.25E-07 | 1.98E-05 | -10.8311 |
| 120 | 0.04175 | 0.01825 | 2.28E-07 | 1.98E-05 | -10.8313 |
| 122 | 0.043   | 0.0205  | 2.56E-07 | 1.97E-05 | -10.8327 |
| 124 | 0.0435  | 0.021   | 2.63E-07 | 1.97E-05 | -10.833  |
| 126 | 0.04375 | 0.0205  | 2.56E-07 | 1.97E-05 | -10.8327 |
| 128 | 0.0435  | 0.0205  | 2.56E-07 | 1.97E-05 | -10.8327 |
| 130 | 0.0455  | 0.0225  | 2.81E-07 | 1.97E-05 | -10.8339 |
| 132 | 0.04475 | 0.022   | 2.75E-07 | 1.97E-05 | -10.8336 |
| 134 | 0.04525 | 0.02175 | 2.72E-07 | 1.97E-05 | -10.8335 |
| 136 | 0.04475 | 0.021   | 2.63E-07 | 1.97E-05 | -10.833  |
| 138 | 0.04625 | 0.02625 | 3.28E-07 | 1.97E-05 | -10.8363 |
| 140 | 0.04625 | 0.023   | 2.88E-07 | 1.97E-05 | -10.8343 |
| 142 | 0.04625 | 0.02275 | 2.84E-07 | 1.97E-05 | -10.8341 |
| 144 | 0.0475  | 0.02425 | 3.03E-07 | 1.97E-05 | -10.8351 |
| 146 | 0.048   | 0.0245  | 3.06E-07 | 1.97E-05 | -10.8352 |
| 148 | 0.04775 | 0.02375 | 2.97E-07 | 1.97E-05 | -10.8347 |
| 150 | 0.0475  | 0.02325 | 2.91E-07 | 1.97E-05 | -10.8344 |
| 152 | 0.0485  | 0.025   | 3.13E-07 | 1.97E-05 | -10.8355 |
| 154 | 0.04925 | 0.0255  | 3.19E-07 | 1.97E-05 | -10.8358 |
| 156 | 0.0495  | 0.0255  | 3.19E-07 | 1.97E-05 | -10.8358 |
| 158 | 0.05    | 0.026   | 3.25E-07 | 1.97E-05 | -10.8362 |
| 160 | 0.04975 | 0.026   | 3.25E-07 | 1.97E-05 | -10.8362 |
| 162 | 0.04975 | 0.02625 | 3.28E-07 | 1.97E-05 | -10.8363 |
| 164 | 0.05075 | 0.0265  | 3.31E-07 | 1.97E-05 | -10.8365 |
| 166 | 0.05125 | 0.027   | 3.38E-07 | 1.97E-05 | -10.8368 |
| 168 | 0.0515  | 0.028   | 3.5E-07  | 1.97E-05 | -10.8374 |
| 170 | 0.05125 | 0.0265  | 3.31E-07 | 1.97E-05 | -10.8365 |
| 172 | 0.05175 | 0.02825 | 3.53E-07 | 1.96E-05 | -10.8376 |
| 174 | 0.05275 | 0.0285  | 3.56E-07 | 1.96E-05 | -10.8378 |
| 176 | 0.053   | 0.0285  | 3.56E-07 | 1.96E-05 | -10.8378 |
| 178 | 0.053   | 0.0295  | 3.69E-07 | 1.96E-05 | -10.8384 |



|     |         |         |          |          |          |
|-----|---------|---------|----------|----------|----------|
| 180 | 0.052   | 0.02825 | 3.53E-07 | 1.96E-05 | -10.8376 |
| 182 | 0.0535  | 0.0285  | 3.56E-07 | 1.96E-05 | -10.8378 |
| 184 | 0.0545  | 0.03025 | 3.78E-07 | 1.96E-05 | -10.8389 |
| 186 | 0.0545  | 0.03025 | 3.78E-07 | 1.96E-05 | -10.8389 |
| 188 | 0.05475 | 0.0305  | 3.81E-07 | 1.96E-05 | -10.839  |
| 190 | 0.05575 | 0.0315  | 3.94E-07 | 1.96E-05 | -10.8397 |
| 192 | 0.056   | 0.03175 | 3.97E-07 | 1.96E-05 | -10.8398 |
| 194 | 0.05675 | 0.03225 | 4.03E-07 | 1.96E-05 | -10.8401 |
| 196 | 0.0565  | 0.03325 | 4.16E-07 | 1.96E-05 | -10.8408 |
| 198 | 0.0575  | 0.03375 | 4.22E-07 | 1.96E-05 | -10.8411 |
| 200 | 0.057   | 0.03275 | 4.09E-07 | 1.96E-05 | -10.8405 |
| 202 | 0.05825 | 0.034   | 4.25E-07 | 1.96E-05 | -10.8413 |
| 204 | 0.0575  | 0.03325 | 4.16E-07 | 1.96E-05 | -10.8408 |
| 206 | 0.05825 | 0.03375 | 4.22E-07 | 1.96E-05 | -10.8411 |
| 208 | 0.0575  | 0.03325 | 4.16E-07 | 1.96E-05 | -10.8408 |
| 210 | 0.05925 | 0.03475 | 4.34E-07 | 1.96E-05 | -10.8417 |
| 212 | 0.0595  | 0.0345  | 4.31E-07 | 1.96E-05 | -10.8416 |
| 214 | 0.05975 | 0.035   | 4.38E-07 | 1.96E-05 | -10.8419 |
| 216 | 0.05975 | 0.03475 | 4.34E-07 | 1.96E-05 | -10.8417 |
| 218 | 0.0605  | 0.03425 | 4.28E-07 | 1.96E-05 | -10.8414 |
| 220 | 0.06125 | 0.03675 | 4.59E-07 | 1.95E-05 | -10.843  |
| 222 | 0.06125 | 0.0365  | 4.56E-07 | 1.95E-05 | -10.8429 |
| 224 | 0.06175 | 0.037   | 4.63E-07 | 1.95E-05 | -10.8432 |
| 226 | 0.063   | 0.0385  | 4.81E-07 | 1.95E-05 | -10.8441 |
| 228 | 0.06275 | 0.03775 | 4.72E-07 | 1.95E-05 | -10.8437 |
| 230 | 0.06275 | 0.038   | 4.75E-07 | 1.95E-05 | -10.8438 |
| 232 | 0.0635  | 0.038   | 4.75E-07 | 1.95E-05 | -10.8438 |
| 234 | 0.06225 | 0.036   | 4.5E-07  | 1.96E-05 | -10.8425 |
| 236 | 0.06325 | 0.03875 | 4.84E-07 | 1.95E-05 | -10.8443 |
| 238 | 0.063   | 0.038   | 4.75E-07 | 1.95E-05 | -10.8438 |
| 240 | 0.06425 | 0.03875 | 4.84E-07 | 1.95E-05 | -10.8443 |
| 242 | 0.06425 | 0.0385  | 4.81E-07 | 1.95E-05 | -10.8441 |
| 244 | 0.06375 | 0.038   | 4.75E-07 | 1.95E-05 | -10.8438 |
| 246 | 0.065   | 0.04    | 5E-07    | 1.95E-05 | -10.8451 |
| 248 | 0.0655  | 0.03975 | 4.97E-07 | 1.95E-05 | -10.8449 |
| 250 | 0.0655  | 0.0405  | 5.06E-07 | 1.95E-05 | -10.8454 |
| 252 | 0.06675 | 0.04075 | 5.09E-07 | 1.95E-05 | -10.8456 |
| 254 | 0.0665  | 0.04075 | 5.09E-07 | 1.95E-05 | -10.8456 |
| 256 | 0.0675  | 0.0415  | 5.19E-07 | 1.95E-05 | -10.8461 |
| 258 | 0.06675 | 0.04    | 5E-07    | 1.95E-05 | -10.8451 |
| 260 | 0.067   | 0.0405  | 5.06E-07 | 1.95E-05 | -10.8454 |
| 262 | 0.067   | 0.04025 | 5.03E-07 | 1.95E-05 | -10.8453 |
| 264 | 0.0685  | 0.04225 | 5.28E-07 | 1.95E-05 | -10.8465 |
| 266 | 0.06775 | 0.04225 | 5.28E-07 | 1.95E-05 | -10.8465 |
| 268 | 0.068   | 0.042   | 5.25E-07 | 1.95E-05 | -10.8464 |
| 270 | 0.06925 | 0.04375 | 5.47E-07 | 1.95E-05 | -10.8475 |

|     |         |         |          |          |          |
|-----|---------|---------|----------|----------|----------|
| 272 | 0.06975 | 0.043   | 5.38E-07 | 1.95E-05 | -10.847  |
| 274 | 0.07025 | 0.043   | 5.38E-07 | 1.95E-05 | -10.847  |
| 276 | 0.06975 | 0.0435  | 5.44E-07 | 1.95E-05 | -10.8473 |
| 278 | 0.07025 | 0.04425 | 5.53E-07 | 1.94E-05 | -10.8478 |
| 280 | 0.071   | 0.04475 | 5.59E-07 | 1.94E-05 | -10.8481 |
| 282 | 0.07175 | 0.04575 | 5.72E-07 | 1.94E-05 | -10.8488 |
| 284 | 0.0715  | 0.04525 | 5.66E-07 | 1.94E-05 | -10.8485 |
| 286 | 0.07125 | 0.045   | 5.63E-07 | 1.94E-05 | -10.8483 |
| 288 | 0.0715  | 0.044   | 5.5E-07  | 1.95E-05 | -10.8477 |
| 290 | 0.0715  | 0.0455  | 5.69E-07 | 1.94E-05 | -10.8486 |
| 292 | 0.0725  | 0.0455  | 5.69E-07 | 1.94E-05 | -10.8486 |
| 294 | 0.07175 | 0.0455  | 5.69E-07 | 1.94E-05 | -10.8486 |
| 296 | 0.0725  | 0.04625 | 5.78E-07 | 1.94E-05 | -10.8491 |
| 298 | 0.07325 | 0.04525 | 5.66E-07 | 1.94E-05 | -10.8485 |

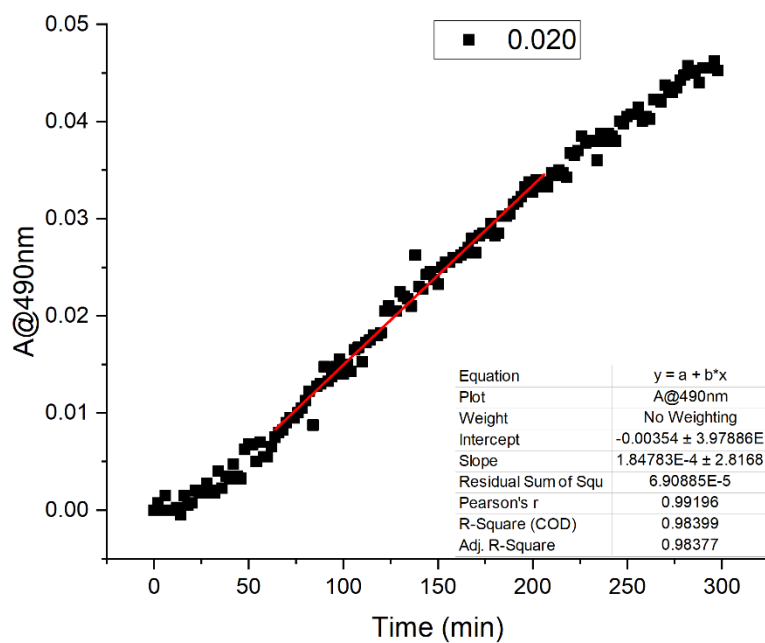

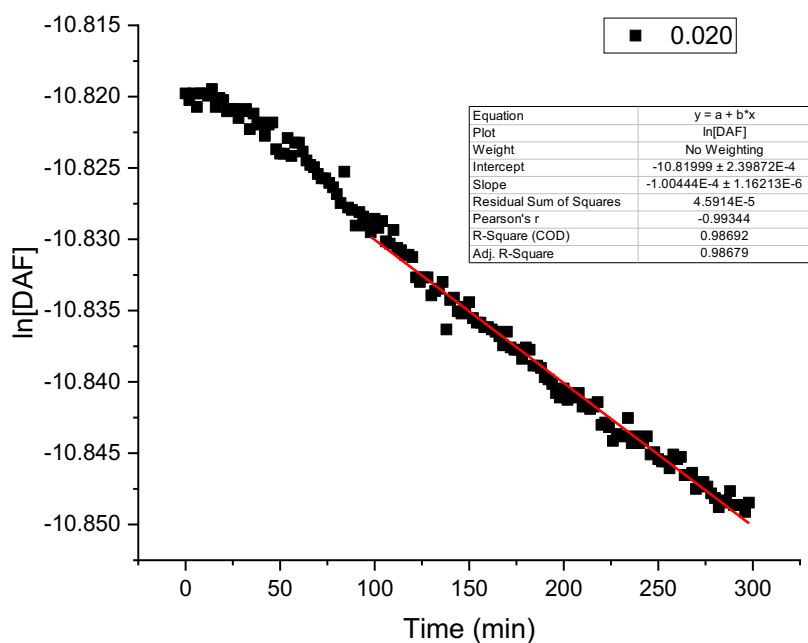

#### 0.025 mM DAF

| Time (min) | A@490nm minus BK | set to 0  | [FLU] (M) | [DAF] (M) | ln[DAF]  |
|------------|------------------|-----------|-----------|-----------|----------|
| 0          | 0.02325          | 0         | 0         | 0.000025  | -10.5966 |
| 2          | 0.02325          | 0         | 0         | 0.000025  | -10.5966 |
| 4          | 0.02325          | -5.00E-04 | -6.3E-09  | 2.5E-05   | -10.5964 |
| 6          | 0.02325          | 0         | 0         | 0.000025  | -10.5966 |
| 8          | 0.0235           | 5.00E-04  | 6.25E-09  | 2.5E-05   | -10.5969 |
| 10         | 0.02375          | 2.50E-04  | 3.13E-09  | 2.5E-05   | -10.5968 |
| 12         | 0.0245           | 0.001     | 1.25E-08  | 2.5E-05   | -10.5971 |
| 14         | 0.024            | -0.001    | -1.3E-08  | 2.5E-05   | -10.5961 |
| 16         | 0.025            | 0.00175   | 2.19E-08  | 2.5E-05   | -10.5975 |
| 18         | 0.025            | 0.00125   | 1.56E-08  | 2.5E-05   | -10.5973 |
| 20         | 0.02575          | 0.001     | 1.25E-08  | 2.5E-05   | -10.5971 |
| 22         | 0.0245           | 7.50E-04  | 9.38E-09  | 2.5E-05   | -10.597  |
| 24         | 0.026            | 0.00225   | 2.81E-08  | 2.5E-05   | -10.5978 |
| 26         | 0.02675          | 0.003     | 3.75E-08  | 2.5E-05   | -10.5981 |
| 28         | 0.0265           | 0.002     | 2.5E-08   | 2.5E-05   | -10.5976 |
| 30         | 0.0265           | 0.002     | 2.5E-08   | 2.5E-05   | -10.5976 |
| 32         | 0.02725          | 0.003     | 3.75E-08  | 2.5E-05   | -10.5981 |
| 34         | 0.02675          | 0.00325   | 4.06E-08  | 2.5E-05   | -10.5983 |
| 36         | 0.02775          | 0.00375   | 4.69E-08  | 2.5E-05   | -10.5985 |
| 38         | 0.02825          | 0.0045    | 5.63E-08  | 2.49E-05  | -10.5989 |
| 40         | 0.0285           | 0.005     | 6.25E-08  | 2.49E-05  | -10.5991 |
| 42         | 0.02875          | 0.00425   | 5.31E-08  | 2.49E-05  | -10.5988 |
| 44         | 0.02925          | 0.0045    | 5.63E-08  | 2.49E-05  | -10.5989 |
| 46         | 0.02875          | 0.00425   | 5.31E-08  | 2.49E-05  | -10.5988 |
| 48         | 0.031            | 0.00675   | 8.44E-08  | 2.49E-05  | -10.6    |

|     |         |         |          |          |          |
|-----|---------|---------|----------|----------|----------|
| 50  | 0.03075 | 0.00675 | 8.44E-08 | 2.49E-05 | -10.6    |
| 52  | 0.0305  | 0.008   | 1E-07    | 2.49E-05 | -10.6006 |
| 54  | 0.03125 | 0.00725 | 9.06E-08 | 2.49E-05 | -10.6003 |
| 56  | 0.0315  | 0.008   | 1E-07    | 2.49E-05 | -10.6006 |
| 58  | 0.03175 | 0.007   | 8.75E-08 | 2.49E-05 | -10.6001 |
| 60  | 0.032   | 0.00675 | 8.44E-08 | 2.49E-05 | -10.6    |
| 62  | 0.03375 | 0.00925 | 1.16E-07 | 2.49E-05 | -10.6013 |
| 64  | 0.034   | 0.01    | 1.25E-07 | 2.49E-05 | -10.6016 |
| 66  | 0.034   | 0.00875 | 1.09E-07 | 2.49E-05 | -10.601  |
| 68  | 0.0345  | 0.00925 | 1.16E-07 | 2.49E-05 | -10.6013 |
| 70  | 0.03425 | 0.00975 | 1.22E-07 | 2.49E-05 | -10.6015 |
| 72  | 0.0355  | 0.01025 | 1.28E-07 | 2.49E-05 | -10.6018 |
| 74  | 0.036   | 0.01175 | 1.47E-07 | 2.49E-05 | -10.6025 |
| 76  | 0.03525 | 0.00975 | 1.22E-07 | 2.49E-05 | -10.6015 |
| 78  | 0.0365  | 0.01225 | 1.53E-07 | 2.48E-05 | -10.6028 |
| 80  | 0.037   | 0.01175 | 1.47E-07 | 2.49E-05 | -10.6025 |
| 82  | 0.0365  | 0.0125  | 1.56E-07 | 2.48E-05 | -10.6029 |
| 84  | 0.03675 | 0.01175 | 1.47E-07 | 2.49E-05 | -10.6025 |
| 86  | 0.03825 | 0.01325 | 1.66E-07 | 2.48E-05 | -10.6033 |
| 88  | 0.039   | 0.015   | 1.88E-07 | 2.48E-05 | -10.6042 |
| 90  | 0.0395  | 0.0155  | 1.94E-07 | 2.48E-05 | -10.6044 |
| 92  | 0.03975 | 0.015   | 1.88E-07 | 2.48E-05 | -10.6042 |
| 94  | 0.04025 | 0.015   | 1.88E-07 | 2.48E-05 | -10.6042 |
| 96  | 0.041   | 0.01625 | 2.03E-07 | 2.48E-05 | -10.6048 |
| 98  | 0.04125 | 0.01675 | 2.09E-07 | 2.48E-05 | -10.605  |
| 100 | 0.04125 | 0.016   | 2E-07    | 2.48E-05 | -10.6047 |
| 102 | 0.04175 | 0.01725 | 2.16E-07 | 2.48E-05 | -10.6053 |
| 104 | 0.04175 | 0.017   | 2.13E-07 | 2.48E-05 | -10.6052 |
| 106 | 0.04275 | 0.018   | 2.25E-07 | 2.48E-05 | -10.6057 |
| 108 | 0.04325 | 0.018   | 2.25E-07 | 2.48E-05 | -10.6057 |
| 110 | 0.04325 | 0.01725 | 2.16E-07 | 2.48E-05 | -10.6053 |
| 112 | 0.0435  | 0.0185  | 2.31E-07 | 2.48E-05 | -10.6059 |
| 114 | 0.0455  | 0.02025 | 2.53E-07 | 2.47E-05 | -10.6068 |
| 116 | 0.04575 | 0.0205  | 2.56E-07 | 2.47E-05 | -10.6069 |
| 118 | 0.04575 | 0.0195  | 2.44E-07 | 2.48E-05 | -10.6064 |
| 120 | 0.04625 | 0.021   | 2.63E-07 | 2.47E-05 | -10.6072 |
| 122 | 0.04725 | 0.0205  | 2.56E-07 | 2.47E-05 | -10.6069 |
| 124 | 0.04675 | 0.022   | 2.75E-07 | 2.47E-05 | -10.6077 |
| 126 | 0.048   | 0.0225  | 2.81E-07 | 2.47E-05 | -10.6079 |
| 128 | 0.0475  | 0.0225  | 2.81E-07 | 2.47E-05 | -10.6079 |
| 130 | 0.04925 | 0.0235  | 2.94E-07 | 2.47E-05 | -10.6085 |
| 132 | 0.04875 | 0.02375 | 2.97E-07 | 2.47E-05 | -10.6086 |
| 134 | 0.05    | 0.024   | 3E-07    | 2.47E-05 | -10.6087 |
| 136 | 0.04975 | 0.02425 | 3.03E-07 | 2.47E-05 | -10.6088 |
| 138 | 0.051   | 0.03    | 3.75E-07 | 2.46E-05 | -10.6117 |
| 140 | 0.05125 | 0.026   | 3.25E-07 | 2.47E-05 | -10.6097 |

|     |         |         |          |          |          |
|-----|---------|---------|----------|----------|----------|
| 142 | 0.051   | 0.02525 | 3.16E-07 | 2.47E-05 | -10.6093 |
| 144 | 0.05225 | 0.027   | 3.38E-07 | 2.47E-05 | -10.6102 |
| 146 | 0.05225 | 0.026   | 3.25E-07 | 2.47E-05 | -10.6097 |
| 148 | 0.05375 | 0.02675 | 3.34E-07 | 2.47E-05 | -10.6101 |
| 150 | 0.05275 | 0.0265  | 3.31E-07 | 2.47E-05 | -10.61   |
| 152 | 0.0535  | 0.028   | 3.5E-07  | 2.47E-05 | -10.6107 |
| 154 | 0.0545  | 0.02775 | 3.47E-07 | 2.47E-05 | -10.6106 |
| 156 | 0.05475 | 0.029   | 3.63E-07 | 2.46E-05 | -10.6112 |
| 158 | 0.05525 | 0.028   | 3.5E-07  | 2.47E-05 | -10.6107 |
| 160 | 0.0555  | 0.0295  | 3.69E-07 | 2.46E-05 | -10.6115 |
| 162 | 0.05575 | 0.029   | 3.63E-07 | 2.46E-05 | -10.6112 |
| 164 | 0.0575  | 0.0305  | 3.81E-07 | 2.46E-05 | -10.612  |
| 166 | 0.0565  | 0.03025 | 3.78E-07 | 2.46E-05 | -10.6119 |
| 168 | 0.05775 | 0.03075 | 3.84E-07 | 2.46E-05 | -10.6121 |
| 170 | 0.058   | 0.03075 | 3.84E-07 | 2.46E-05 | -10.6121 |
| 172 | 0.05875 | 0.03225 | 4.03E-07 | 2.46E-05 | -10.6129 |
| 174 | 0.05925 | 0.0325  | 4.06E-07 | 2.46E-05 | -10.613  |
| 176 | 0.059   | 0.03125 | 3.91E-07 | 2.46E-05 | -10.6124 |
| 178 | 0.05925 | 0.03325 | 4.16E-07 | 2.46E-05 | -10.6134 |
| 180 | 0.059   | 0.032   | 4E-07    | 2.46E-05 | -10.6128 |
| 182 | 0.0595  | 0.0315  | 3.94E-07 | 2.46E-05 | -10.6125 |
| 184 | 0.06075 | 0.0335  | 4.19E-07 | 2.46E-05 | -10.6135 |
| 186 | 0.06125 | 0.0345  | 4.31E-07 | 2.46E-05 | -10.614  |
| 188 | 0.062   | 0.035   | 4.38E-07 | 2.46E-05 | -10.6143 |
| 190 | 0.0615  | 0.03475 | 4.34E-07 | 2.46E-05 | -10.6142 |
| 192 | 0.06225 | 0.03575 | 4.47E-07 | 2.46E-05 | -10.6147 |
| 194 | 0.06275 | 0.0355  | 4.44E-07 | 2.46E-05 | -10.6145 |
| 196 | 0.0635  | 0.036   | 4.5E-07  | 2.46E-05 | -10.6148 |
| 198 | 0.06425 | 0.0375  | 4.69E-07 | 2.45E-05 | -10.6156 |
| 200 | 0.065   | 0.03825 | 4.78E-07 | 2.45E-05 | -10.6159 |
| 202 | 0.065   | 0.03825 | 4.78E-07 | 2.45E-05 | -10.6159 |
| 204 | 0.06475 | 0.03725 | 4.66E-07 | 2.45E-05 | -10.6154 |
| 206 | 0.06575 | 0.0385  | 4.81E-07 | 2.45E-05 | -10.6161 |
| 208 | 0.06575 | 0.0385  | 4.81E-07 | 2.45E-05 | -10.6161 |
| 210 | 0.066   | 0.039   | 4.88E-07 | 2.45E-05 | -10.6163 |
| 212 | 0.06675 | 0.03875 | 4.84E-07 | 2.45E-05 | -10.6162 |
| 214 | 0.06825 | 0.04075 | 5.09E-07 | 2.45E-05 | -10.6172 |
| 216 | 0.06775 | 0.04    | 5E-07    | 2.45E-05 | -10.6168 |
| 218 | 0.06875 | 0.04025 | 5.03E-07 | 2.45E-05 | -10.617  |
| 220 | 0.069   | 0.041   | 5.13E-07 | 2.45E-05 | -10.6173 |
| 222 | 0.06925 | 0.041   | 5.13E-07 | 2.45E-05 | -10.6173 |
| 224 | 0.06925 | 0.04225 | 5.28E-07 | 2.45E-05 | -10.618  |
| 226 | 0.0705  | 0.043   | 5.38E-07 | 2.45E-05 | -10.6184 |
| 228 | 0.07    | 0.04275 | 5.34E-07 | 2.45E-05 | -10.6182 |
| 230 | 0.07025 | 0.04275 | 5.34E-07 | 2.45E-05 | -10.6182 |
| 232 | 0.071   | 0.04275 | 5.34E-07 | 2.45E-05 | -10.6182 |

|     |         |         |          |          |          |
|-----|---------|---------|----------|----------|----------|
| 234 | 0.0705  | 0.04275 | 5.34E-07 | 2.45E-05 | -10.6182 |
| 236 | 0.0715  | 0.0445  | 5.56E-07 | 2.44E-05 | -10.6191 |
| 238 | 0.071   | 0.04325 | 5.41E-07 | 2.45E-05 | -10.6185 |
| 240 | 0.07125 | 0.04275 | 5.34E-07 | 2.45E-05 | -10.6182 |
| 242 | 0.07325 | 0.045   | 5.63E-07 | 2.44E-05 | -10.6194 |
| 244 | 0.072   | 0.0435  | 5.44E-07 | 2.45E-05 | -10.6186 |
| 246 | 0.073   | 0.0445  | 5.56E-07 | 2.44E-05 | -10.6191 |
| 248 | 0.0735  | 0.0445  | 5.56E-07 | 2.44E-05 | -10.6191 |
| 250 | 0.07425 | 0.046   | 5.75E-07 | 2.44E-05 | -10.6199 |
| 252 | 0.07425 | 0.04575 | 5.72E-07 | 2.44E-05 | -10.6198 |
| 254 | 0.07475 | 0.046   | 5.75E-07 | 2.44E-05 | -10.6199 |
| 256 | 0.075   | 0.04575 | 5.72E-07 | 2.44E-05 | -10.6198 |
| 258 | 0.07525 | 0.0465  | 5.81E-07 | 2.44E-05 | -10.6202 |
| 260 | 0.0755  | 0.047   | 5.88E-07 | 2.44E-05 | -10.6204 |
| 262 | 0.076   | 0.0465  | 5.81E-07 | 2.44E-05 | -10.6202 |
| 264 | 0.0765  | 0.0475  | 5.94E-07 | 2.44E-05 | -10.6207 |
| 266 | 0.07625 | 0.0485  | 6.06E-07 | 2.44E-05 | -10.6212 |
| 268 | 0.07675 | 0.048   | 6E-07    | 2.44E-05 | -10.6209 |
| 270 | 0.0775  | 0.04925 | 6.16E-07 | 2.44E-05 | -10.6216 |
| 272 | 0.078   | 0.04775 | 5.97E-07 | 2.44E-05 | -10.6208 |
| 274 | 0.078   | 0.04725 | 5.91E-07 | 2.44E-05 | -10.6205 |
| 276 | 0.078   | 0.04825 | 6.03E-07 | 2.44E-05 | -10.6211 |
| 278 | 0.0795  | 0.05    | 6.25E-07 | 2.44E-05 | -10.622  |
| 280 | 0.079   | 0.04925 | 6.16E-07 | 2.44E-05 | -10.6216 |
| 282 | 0.0805  | 0.05125 | 6.41E-07 | 2.44E-05 | -10.6226 |
| 284 | 0.0805  | 0.051   | 6.38E-07 | 2.44E-05 | -10.6225 |
| 286 | 0.07925 | 0.04925 | 6.16E-07 | 2.44E-05 | -10.6216 |
| 288 | 0.0805  | 0.0505  | 6.31E-07 | 2.44E-05 | -10.6222 |
| 290 | 0.081   | 0.0515  | 6.44E-07 | 2.44E-05 | -10.6227 |
| 292 | 0.08175 | 0.05175 | 6.47E-07 | 2.44E-05 | -10.6229 |
| 294 | 0.0815  | 0.052   | 6.5E-07  | 2.44E-05 | -10.623  |
| 296 | 0.0815  | 0.052   | 6.5E-07  | 2.44E-05 | -10.623  |
| 298 | 0.08125 | 0.05075 | 6.34E-07 | 2.44E-05 | -10.6223 |

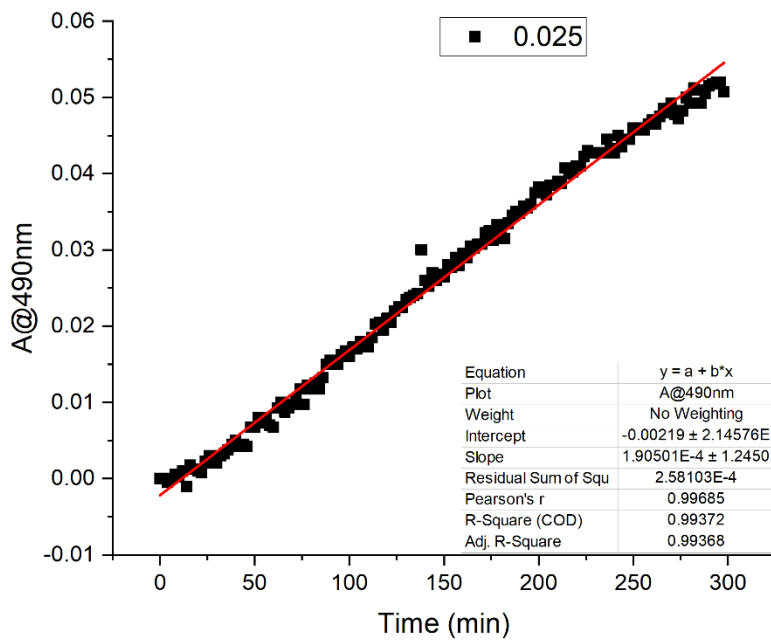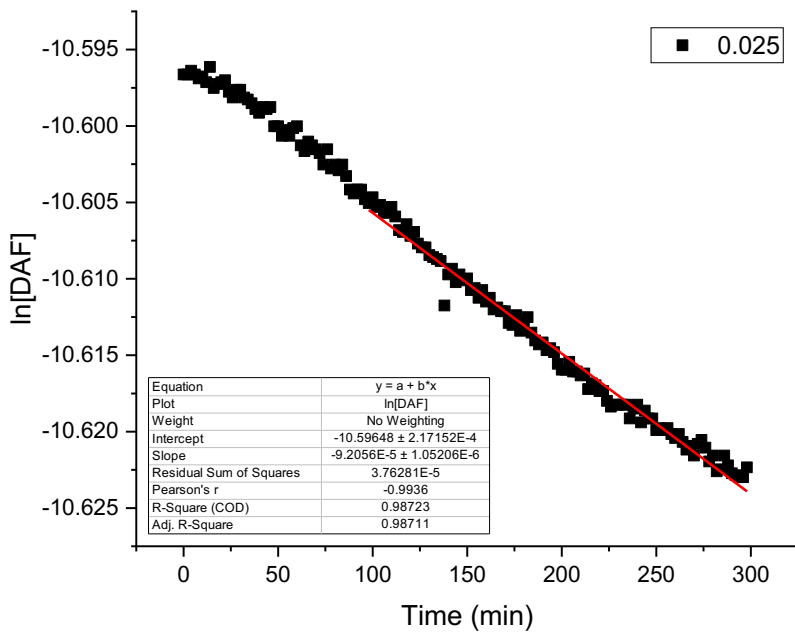

**0.050 mM DAF**

| Time (min) | A@490nm minus BK | set to 0 | [FLU] (M) | [DAF] (M) | ln[DAF]  |
|------------|------------------|----------|-----------|-----------|----------|
| 0          | 0.0255           | 0        | 0         | 0.00005   | -9.90349 |
| 2          | 0.02675          | 0        | 0         | 0.00005   | -9.90349 |
| 4          | 0.02425          | -0.003   | -3.8E-08  | 5E-05     | -9.90274 |
| 6          | 0.02475          | -0.0025  | -3.1E-08  | 5E-05     | -9.90286 |
| 8          | 0.02575          | -0.0025  | -3.1E-08  | 5E-05     | -9.90286 |
| 10         | 0.0255           | -0.001   | -1.3E-08  | 5E-05     | -9.90324 |

|     |         |           |          |          |          |
|-----|---------|-----------|----------|----------|----------|
| 12  | 0.026   | -7.50E-04 | -9.4E-09 | 5E-05    | -9.9033  |
| 14  | 0.02625 | -7.50E-04 | -9.4E-09 | 5E-05    | -9.9033  |
| 16  | 0.02775 | 5.00E-04  | 6.25E-09 | 5E-05    | -9.90361 |
| 18  | 0.02725 | 2.50E-04  | 3.13E-09 | 5E-05    | -9.90355 |
| 20  | 0.0285  | 5.00E-04  | 6.25E-09 | 5E-05    | -9.90361 |
| 22  | 0.02775 | 0.001     | 1.25E-08 | 5E-05    | -9.90374 |
| 24  | 0.028   | 7.50E-04  | 9.38E-09 | 5E-05    | -9.90368 |
| 26  | 0.03    | 0.0015    | 1.88E-08 | 5E-05    | -9.90386 |
| 28  | 0.03025 | 0.0025    | 3.13E-08 | 5E-05    | -9.90411 |
| 30  | 0.031   | 0.0035    | 4.38E-08 | 5E-05    | -9.90436 |
| 32  | 0.031   | 0.00375   | 4.69E-08 | 5E-05    | -9.90443 |
| 34  | 0.032   | 0.00425   | 5.31E-08 | 4.99E-05 | -9.90455 |
| 36  | 0.032   | 0.00425   | 5.31E-08 | 4.99E-05 | -9.90455 |
| 38  | 0.033   | 0.00525   | 6.56E-08 | 4.99E-05 | -9.9048  |
| 40  | 0.033   | 0.00475   | 5.94E-08 | 4.99E-05 | -9.90468 |
| 42  | 0.03375 | 0.00425   | 5.31E-08 | 4.99E-05 | -9.90455 |
| 44  | 0.0345  | 0.00525   | 6.56E-08 | 4.99E-05 | -9.9048  |
| 46  | 0.0345  | 0.005     | 6.25E-08 | 4.99E-05 | -9.90474 |
| 48  | 0.03725 | 0.0085    | 1.06E-07 | 4.99E-05 | -9.90561 |
| 50  | 0.03775 | 0.00975   | 1.22E-07 | 4.99E-05 | -9.90593 |
| 52  | 0.037   | 0.01      | 1.25E-07 | 4.99E-05 | -9.90599 |
| 54  | 0.0385  | 0.01      | 1.25E-07 | 4.99E-05 | -9.90599 |
| 56  | 0.03975 | 0.01175   | 1.47E-07 | 4.99E-05 | -9.90643 |
| 58  | 0.03975 | 0.01075   | 1.34E-07 | 4.99E-05 | -9.90618 |
| 60  | 0.03925 | 0.011     | 1.38E-07 | 4.99E-05 | -9.90624 |
| 62  | 0.0405  | 0.0115    | 1.44E-07 | 4.99E-05 | -9.90637 |
| 64  | 0.0415  | 0.013     | 1.63E-07 | 4.98E-05 | -9.90674 |
| 66  | 0.0425  | 0.013     | 1.63E-07 | 4.98E-05 | -9.90674 |
| 68  | 0.04325 | 0.0135    | 1.69E-07 | 4.98E-05 | -9.90687 |
| 70  | 0.04425 | 0.01325   | 1.66E-07 | 4.98E-05 | -9.90681 |
| 72  | 0.0455  | 0.016     | 2E-07    | 4.98E-05 | -9.9075  |
| 74  | 0.0465  | 0.01675   | 2.09E-07 | 4.98E-05 | -9.90768 |
| 76  | 0.0465  | 0.0155    | 1.94E-07 | 4.98E-05 | -9.90737 |
| 78  | 0.048   | 0.0175    | 2.19E-07 | 4.98E-05 | -9.90787 |
| 80  | 0.04775 | 0.015     | 1.88E-07 | 4.98E-05 | -9.90724 |
| 82  | 0.04875 | 0.01725   | 2.16E-07 | 4.98E-05 | -9.90781 |
| 84  | 0.04725 | 0.01425   | 1.78E-07 | 4.98E-05 | -9.90706 |
| 86  | 0.05    | 0.019     | 2.38E-07 | 4.98E-05 | -9.90825 |
| 88  | 0.05175 | 0.02025   | 2.53E-07 | 4.97E-05 | -9.90856 |
| 90  | 0.0525  | 0.0235    | 2.94E-07 | 4.97E-05 | -9.90938 |
| 92  | 0.05275 | 0.0225    | 2.81E-07 | 4.97E-05 | -9.90913 |
| 94  | 0.053   | 0.02275   | 2.84E-07 | 4.97E-05 | -9.90919 |
| 96  | 0.0545  | 0.02425   | 3.03E-07 | 4.97E-05 | -9.90957 |
| 98  | 0.055   | 0.02425   | 3.03E-07 | 4.97E-05 | -9.90957 |
| 100 | 0.056   | 0.025     | 3.13E-07 | 4.97E-05 | -9.90976 |
| 102 | 0.0575  | 0.0265    | 3.31E-07 | 4.97E-05 | -9.91013 |



|     |         |         |          |          |          |
|-----|---------|---------|----------|----------|----------|
| 104 | 0.05725 | 0.02625 | 3.28E-07 | 4.97E-05 | -9.91007 |
| 106 | 0.05825 | 0.02775 | 3.47E-07 | 4.97E-05 | -9.91045 |
| 108 | 0.06    | 0.02925 | 3.66E-07 | 4.96E-05 | -9.91083 |
| 110 | 0.0595  | 0.028   | 3.5E-07  | 4.97E-05 | -9.91051 |
| 112 | 0.0615  | 0.03125 | 3.91E-07 | 4.96E-05 | -9.91133 |
| 114 | 0.06175 | 0.02975 | 3.72E-07 | 4.96E-05 | -9.91095 |
| 116 | 0.06275 | 0.0315  | 3.94E-07 | 4.96E-05 | -9.91139 |
| 118 | 0.06375 | 0.0325  | 4.06E-07 | 4.96E-05 | -9.91165 |
| 120 | 0.0645  | 0.03275 | 4.09E-07 | 4.96E-05 | -9.91171 |
| 122 | 0.06625 | 0.0335  | 4.19E-07 | 4.96E-05 | -9.9119  |
| 124 | 0.0665  | 0.035   | 4.38E-07 | 4.96E-05 | -9.91228 |
| 126 | 0.06775 | 0.03525 | 4.41E-07 | 4.96E-05 | -9.91234 |
| 128 | 0.0685  | 0.03625 | 4.53E-07 | 4.95E-05 | -9.91259 |
| 130 | 0.0705  | 0.0375  | 4.69E-07 | 4.95E-05 | -9.91291 |
| 132 | 0.0705  | 0.03775 | 4.72E-07 | 4.95E-05 | -9.91297 |
| 134 | 0.072   | 0.0395  | 4.94E-07 | 4.95E-05 | -9.91341 |
| 136 | 0.07125 | 0.038   | 4.75E-07 | 4.95E-05 | -9.91303 |
| 138 | 0.07325 | 0.045   | 5.63E-07 | 4.94E-05 | -9.9148  |
| 140 | 0.07375 | 0.04    | 5E-07    | 4.95E-05 | -9.91354 |
| 142 | 0.075   | 0.0425  | 5.31E-07 | 4.95E-05 | -9.91417 |
| 144 | 0.0765  | 0.042   | 5.25E-07 | 4.95E-05 | -9.91404 |
| 146 | 0.077   | 0.0435  | 5.44E-07 | 4.95E-05 | -9.91442 |
| 148 | 0.0775  | 0.044   | 5.5E-07  | 4.95E-05 | -9.91455 |
| 150 | 0.0785  | 0.04575 | 5.72E-07 | 4.94E-05 | -9.91499 |
| 152 | 0.07925 | 0.0465  | 5.81E-07 | 4.94E-05 | -9.91518 |
| 154 | 0.08025 | 0.0465  | 5.81E-07 | 4.94E-05 | -9.91518 |
| 156 | 0.081   | 0.0465  | 5.81E-07 | 4.94E-05 | -9.91518 |
| 158 | 0.08225 | 0.04675 | 5.84E-07 | 4.94E-05 | -9.91524 |
| 160 | 0.08275 | 0.04675 | 5.84E-07 | 4.94E-05 | -9.91524 |
| 162 | 0.08325 | 0.048   | 6E-07    | 4.94E-05 | -9.91556 |
| 164 | 0.0855  | 0.0505  | 6.31E-07 | 4.94E-05 | -9.91619 |
| 166 | 0.0855  | 0.05075 | 6.34E-07 | 4.94E-05 | -9.91626 |
| 168 | 0.0875  | 0.05275 | 6.59E-07 | 4.93E-05 | -9.91676 |
| 170 | 0.0885  | 0.05375 | 6.72E-07 | 4.93E-05 | -9.91702 |
| 172 | 0.08725 | 0.05025 | 6.28E-07 | 4.94E-05 | -9.91613 |
| 174 | 0.09025 | 0.0545  | 6.81E-07 | 4.93E-05 | -9.91721 |
| 176 | 0.0905  | 0.05375 | 6.72E-07 | 4.93E-05 | -9.91702 |
| 178 | 0.0905  | 0.0535  | 6.69E-07 | 4.93E-05 | -9.91695 |
| 180 | 0.0895  | 0.05275 | 6.59E-07 | 4.93E-05 | -9.91676 |
| 182 | 0.09225 | 0.05425 | 6.78E-07 | 4.93E-05 | -9.91714 |
| 184 | 0.0945  | 0.05725 | 7.16E-07 | 4.93E-05 | -9.9179  |
| 186 | 0.09525 | 0.05775 | 7.22E-07 | 4.93E-05 | -9.91803 |
| 188 | 0.09575 | 0.0585  | 7.31E-07 | 4.93E-05 | -9.91822 |
| 190 | 0.09625 | 0.05975 | 7.47E-07 | 4.93E-05 | -9.91854 |
| 192 | 0.09725 | 0.06025 | 7.53E-07 | 4.92E-05 | -9.91866 |
| 194 | 0.09875 | 0.0605  | 7.56E-07 | 4.92E-05 | -9.91873 |

|     |         |         |          |          |          |
|-----|---------|---------|----------|----------|----------|
| 196 | 0.09925 | 0.061   | 7.63E-07 | 4.92E-05 | -9.91886 |
| 198 | 0.10125 | 0.06525 | 8.16E-07 | 4.92E-05 | -9.91993 |
| 200 | 0.10175 | 0.06425 | 8.03E-07 | 4.92E-05 | -9.91968 |
| 202 | 0.1025  | 0.065   | 8.13E-07 | 4.92E-05 | -9.91987 |
| 204 | 0.10275 | 0.0655  | 8.19E-07 | 4.92E-05 | -9.92    |
| 206 | 0.10475 | 0.06725 | 8.41E-07 | 4.92E-05 | -9.92044 |
| 208 | 0.10475 | 0.06725 | 8.41E-07 | 4.92E-05 | -9.92044 |
| 210 | 0.1065  | 0.06825 | 8.53E-07 | 4.91E-05 | -9.9207  |
| 212 | 0.10625 | 0.068   | 8.5E-07  | 4.92E-05 | -9.92063 |
| 214 | 0.10825 | 0.06975 | 8.72E-07 | 4.91E-05 | -9.92108 |
| 216 | 0.1085  | 0.06975 | 8.72E-07 | 4.91E-05 | -9.92108 |
| 218 | 0.109   | 0.06925 | 8.66E-07 | 4.91E-05 | -9.92095 |
| 220 | 0.1115  | 0.07225 | 9.03E-07 | 4.91E-05 | -9.92172 |
| 222 | 0.112   | 0.07075 | 8.84E-07 | 4.91E-05 | -9.92133 |
| 224 | 0.113   | 0.073   | 9.13E-07 | 4.91E-05 | -9.92191 |
| 226 | 0.1135  | 0.0725  | 9.06E-07 | 4.91E-05 | -9.92178 |
| 228 | 0.114   | 0.07275 | 9.09E-07 | 4.91E-05 | -9.92184 |
| 230 | 0.115   | 0.07425 | 9.28E-07 | 4.91E-05 | -9.92222 |
| 232 | 0.116   | 0.07375 | 9.22E-07 | 4.91E-05 | -9.9221  |
| 234 | 0.11575 | 0.073   | 9.13E-07 | 4.91E-05 | -9.92191 |
| 236 | 0.11775 | 0.0775  | 9.69E-07 | 4.9E-05  | -9.92305 |
| 238 | 0.1175  | 0.07725 | 9.66E-07 | 4.9E-05  | -9.92299 |
| 240 | 0.1185  | 0.076   | 9.5E-07  | 4.91E-05 | -9.92267 |
| 242 | 0.1195  | 0.07875 | 9.84E-07 | 4.9E-05  | -9.92337 |
| 244 | 0.1205  | 0.08025 | 1E-06    | 4.9E-05  | -9.92375 |
| 246 | 0.122   | 0.0815  | 1.02E-06 | 4.9E-05  | -9.92407 |
| 248 | 0.123   | 0.08175 | 1.02E-06 | 4.9E-05  | -9.92414 |
| 250 | 0.1235  | 0.08225 | 1.03E-06 | 4.9E-05  | -9.92426 |
| 252 | 0.12525 | 0.08425 | 1.05E-06 | 4.89E-05 | -9.92478 |
| 254 | 0.1255  | 0.08425 | 1.05E-06 | 4.89E-05 | -9.92478 |
| 256 | 0.12625 | 0.083   | 1.04E-06 | 4.9E-05  | -9.92446 |
| 258 | 0.127   | 0.08425 | 1.05E-06 | 4.89E-05 | -9.92478 |
| 260 | 0.127   | 0.084   | 1.05E-06 | 4.9E-05  | -9.92471 |
| 262 | 0.12825 | 0.083   | 1.04E-06 | 4.9E-05  | -9.92446 |
| 264 | 0.12975 | 0.08625 | 1.08E-06 | 4.89E-05 | -9.92529 |
| 266 | 0.12975 | 0.08775 | 1.1E-06  | 4.89E-05 | -9.92567 |
| 268 | 0.131   | 0.0865  | 1.08E-06 | 4.89E-05 | -9.92535 |
| 270 | 0.1325  | 0.08825 | 1.1E-06  | 4.89E-05 | -9.9258  |
| 272 | 0.133   | 0.089   | 1.11E-06 | 4.89E-05 | -9.92599 |
| 274 | 0.13375 | 0.0895  | 1.12E-06 | 4.89E-05 | -9.92612 |
| 276 | 0.13425 | 0.09025 | 1.13E-06 | 4.89E-05 | -9.92631 |
| 278 | 0.13575 | 0.09125 | 1.14E-06 | 4.89E-05 | -9.92656 |
| 280 | 0.138   | 0.0935  | 1.17E-06 | 4.88E-05 | -9.92714 |
| 282 | 0.138   | 0.09375 | 1.17E-06 | 4.88E-05 | -9.9272  |
| 284 | 0.1385  | 0.0925  | 1.16E-06 | 4.88E-05 | -9.92688 |
| 286 | 0.1385  | 0.09275 | 1.16E-06 | 4.88E-05 | -9.92695 |

|     |         |         |          |          |          |
|-----|---------|---------|----------|----------|----------|
| 288 | 0.13925 | 0.092   | 1.15E-06 | 4.89E-05 | -9.92676 |
| 290 | 0.14025 | 0.0955  | 1.19E-06 | 4.88E-05 | -9.92765 |
| 292 | 0.142   | 0.09475 | 1.18E-06 | 4.88E-05 | -9.92746 |
| 294 | 0.142   | 0.0955  | 1.19E-06 | 4.88E-05 | -9.92765 |
| 296 | 0.142   | 0.095   | 1.19E-06 | 4.88E-05 | -9.92752 |
| 298 | 0.144   | 0.09725 | 1.22E-06 | 4.88E-05 | -9.9281  |

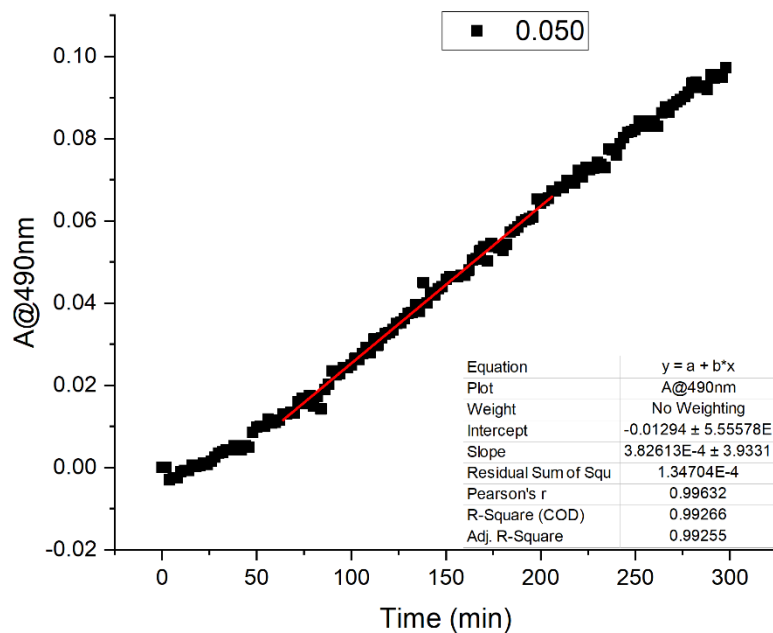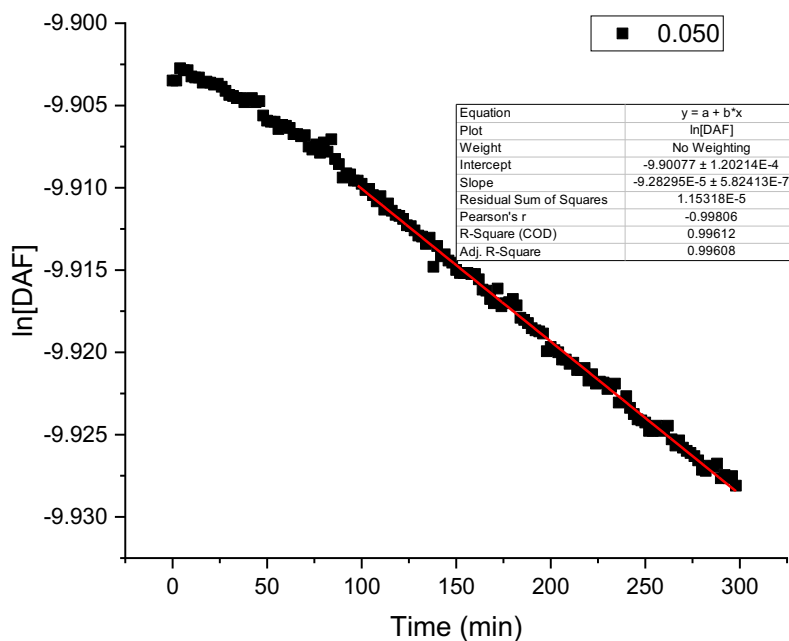

## 0.075 mM DAF

| Time (min) | A@490nm minus BK | set to 0 | [FLU] (M) | [DAF] (M) | ln[DAF]  |
|------------|------------------|----------|-----------|-----------|----------|
| 0          | 0.026            | 0        | 0         | 0.000075  | -9.49802 |
| 2          | 0.02525          | 0        | 0         | 0.000075  | -9.49802 |
| 4          | 0.02575          | 0.00125  | 1.56E-08  | 7.5E-05   | -9.49823 |
| 6          | 0.0255           | 0.001    | 1.25E-08  | 7.5E-05   | -9.49819 |
| 8          | 0.02525          | 0.001    | 1.25E-08  | 7.5E-05   | -9.49819 |
| 10         | 0.025            | -0.0015  | -1.9E-08  | 7.5E-05   | -9.49777 |
| 12         | 0.0255           | 7.50E-04 | 9.38E-09  | 7.5E-05   | -9.49815 |
| 14         | 0.02575          | 2.50E-04 | 3.13E-09  | 7.5E-05   | -9.49806 |
| 16         | 0.02675          | 0.00225  | 2.81E-08  | 7.5E-05   | -9.4984  |
| 18         | 0.0255           | 0        | 0         | 0.000075  | -9.49802 |
| 20         | 0.02725          | 0.0025   | 3.13E-08  | 7.5E-05   | -9.49844 |
| 22         | 0.02675          | 0.002    | 2.5E-08   | 7.5E-05   | -9.49836 |
| 24         | 0.02775          | 0.0035   | 4.38E-08  | 7.5E-05   | -9.49861 |
| 26         | 0.02925          | 0.0045   | 5.63E-08  | 7.49E-05  | -9.49877 |
| 28         | 0.02925          | 0.003    | 3.75E-08  | 7.5E-05   | -9.49852 |
| 30         | 0.03             | 0.004    | 5E-08     | 7.5E-05   | -9.49869 |
| 32         | 0.0295           | 0.00175  | 2.19E-08  | 7.5E-05   | -9.49831 |
| 34         | 0.0315           | 0.004    | 5E-08     | 7.5E-05   | -9.49869 |
| 36         | 0.03125          | 0.0035   | 4.38E-08  | 7.5E-05   | -9.49861 |
| 38         | 0.03225          | 0.00525  | 6.56E-08  | 7.49E-05  | -9.4989  |
| 40         | 0.032            | 0.006    | 7.5E-08   | 7.49E-05  | -9.49902 |
| 42         | 0.03375          | 0.00675  | 8.44E-08  | 7.49E-05  | -9.49915 |
| 44         | 0.0345           | 0.00775  | 9.69E-08  | 7.49E-05  | -9.49931 |
| 46         | 0.0345           | 0.0065   | 8.13E-08  | 7.49E-05  | -9.49911 |
| 48         | 0.0365           | 0.009    | 1.13E-07  | 7.49E-05  | -9.49952 |
| 50         | 0.0375           | 0.00975  | 1.22E-07  | 7.49E-05  | -9.49965 |
| 52         | 0.03675          | 0.0105   | 1.31E-07  | 7.49E-05  | -9.49977 |
| 54         | 0.0395           | 0.01075  | 1.34E-07  | 7.49E-05  | -9.49982 |
| 56         | 0.03875          | 0.011    | 1.38E-07  | 7.49E-05  | -9.49986 |
| 58         | 0.04             | 0.01125  | 1.41E-07  | 7.49E-05  | -9.4999  |
| 60         | 0.04025          | 0.01125  | 1.41E-07  | 7.49E-05  | -9.4999  |
| 62         | 0.042            | 0.01375  | 1.72E-07  | 7.48E-05  | -9.50032 |
| 64         | 0.04225          | 0.0145   | 1.81E-07  | 7.48E-05  | -9.50044 |
| 66         | 0.043            | 0.01525  | 1.91E-07  | 7.48E-05  | -9.50057 |
| 68         | 0.044            | 0.016    | 2E-07     | 7.48E-05  | -9.50069 |
| 70         | 0.04425          | 0.0155   | 1.94E-07  | 7.48E-05  | -9.50061 |
| 72         | 0.04575          | 0.01625  | 2.03E-07  | 7.48E-05  | -9.50073 |
| 74         | 0.04625          | 0.0175   | 2.19E-07  | 7.48E-05  | -9.50094 |
| 76         | 0.04775          | 0.01875  | 2.34E-07  | 7.48E-05  | -9.50115 |
| 78         | 0.04925          | 0.01975  | 2.47E-07  | 7.48E-05  | -9.50132 |
| 80         | 0.049            | 0.019    | 2.38E-07  | 7.48E-05  | -9.50119 |
| 82         | 0.04975          | 0.02025  | 2.53E-07  | 7.47E-05  | -9.5014  |
| 84         | 0.04975          | 0.0195   | 2.44E-07  | 7.48E-05  | -9.50128 |
| 86         | 0.05275          | 0.02225  | 2.78E-07  | 7.47E-05  | -9.50174 |

|     |         |         |          |          |          |
|-----|---------|---------|----------|----------|----------|
| 88  | 0.05325 | 0.023   | 2.88E-07 | 7.47E-05 | -9.50186 |
| 90  | 0.05475 | 0.02525 | 3.16E-07 | 7.47E-05 | -9.50224 |
| 92  | 0.05525 | 0.02475 | 3.09E-07 | 7.47E-05 | -9.50216 |
| 94  | 0.05625 | 0.0255  | 3.19E-07 | 7.47E-05 | -9.50228 |
| 96  | 0.0575  | 0.02725 | 3.41E-07 | 7.47E-05 | -9.50257 |
| 98  | 0.05825 | 0.028   | 3.5E-07  | 7.47E-05 | -9.5027  |
| 100 | 0.061   | 0.02975 | 3.72E-07 | 7.46E-05 | -9.50299 |
| 102 | 0.06025 | 0.029   | 3.63E-07 | 7.46E-05 | -9.50287 |
| 104 | 0.06125 | 0.0295  | 3.69E-07 | 7.46E-05 | -9.50295 |
| 106 | 0.062   | 0.0315  | 3.94E-07 | 7.46E-05 | -9.50329 |
| 108 | 0.063   | 0.03125 | 3.91E-07 | 7.46E-05 | -9.50324 |
| 110 | 0.06325 | 0.03    | 3.75E-07 | 7.46E-05 | -9.50303 |
| 112 | 0.06475 | 0.033   | 4.13E-07 | 7.46E-05 | -9.50354 |
| 114 | 0.06625 | 0.0345  | 4.31E-07 | 7.46E-05 | -9.50379 |
| 116 | 0.06725 | 0.03525 | 4.41E-07 | 7.46E-05 | -9.50391 |
| 118 | 0.068   | 0.0355  | 4.44E-07 | 7.46E-05 | -9.50396 |
| 120 | 0.07    | 0.038   | 4.75E-07 | 7.45E-05 | -9.50438 |
| 122 | 0.07125 | 0.0385  | 4.81E-07 | 7.45E-05 | -9.50446 |
| 124 | 0.07175 | 0.03975 | 4.97E-07 | 7.45E-05 | -9.50467 |
| 126 | 0.073   | 0.04025 | 5.03E-07 | 7.45E-05 | -9.50475 |
| 128 | 0.074   | 0.0415  | 5.19E-07 | 7.45E-05 | -9.50496 |
| 130 | 0.0755  | 0.04325 | 5.41E-07 | 7.45E-05 | -9.50526 |
| 132 | 0.07575 | 0.043   | 5.38E-07 | 7.45E-05 | -9.50521 |
| 134 | 0.07775 | 0.044   | 5.5E-07  | 7.45E-05 | -9.50538 |
| 136 | 0.07825 | 0.0455  | 5.69E-07 | 7.44E-05 | -9.50563 |
| 138 | 0.08    | 0.0515  | 6.44E-07 | 7.44E-05 | -9.50664 |
| 140 | 0.08025 | 0.049   | 6.13E-07 | 7.44E-05 | -9.50622 |
| 142 | 0.08175 | 0.05    | 6.25E-07 | 7.44E-05 | -9.50639 |
| 144 | 0.082   | 0.0505  | 6.31E-07 | 7.44E-05 | -9.50647 |
| 146 | 0.08325 | 0.0515  | 6.44E-07 | 7.44E-05 | -9.50664 |
| 148 | 0.08475 | 0.052   | 6.5E-07  | 7.44E-05 | -9.50673 |
| 150 | 0.08575 | 0.0535  | 6.69E-07 | 7.43E-05 | -9.50698 |
| 152 | 0.08625 | 0.0545  | 6.81E-07 | 7.43E-05 | -9.50715 |
| 154 | 0.08775 | 0.05475 | 6.84E-07 | 7.43E-05 | -9.50719 |
| 156 | 0.08875 | 0.05575 | 6.97E-07 | 7.43E-05 | -9.50736 |
| 158 | 0.0905  | 0.05625 | 7.03E-07 | 7.43E-05 | -9.50744 |
| 160 | 0.091   | 0.057   | 7.13E-07 | 7.43E-05 | -9.50757 |
| 162 | 0.0915  | 0.05725 | 7.16E-07 | 7.43E-05 | -9.50761 |
| 164 | 0.09325 | 0.05875 | 7.34E-07 | 7.43E-05 | -9.50786 |
| 166 | 0.09425 | 0.06075 | 7.59E-07 | 7.42E-05 | -9.5082  |
| 168 | 0.0955  | 0.06125 | 7.66E-07 | 7.42E-05 | -9.50828 |
| 170 | 0.097   | 0.0625  | 7.81E-07 | 7.42E-05 | -9.50849 |
| 172 | 0.097   | 0.06325 | 7.91E-07 | 7.42E-05 | -9.50862 |
| 174 | 0.09925 | 0.06375 | 7.97E-07 | 7.42E-05 | -9.5087  |
| 176 | 0.09975 | 0.06425 | 8.03E-07 | 7.42E-05 | -9.50879 |
| 178 | 0.1005  | 0.06675 | 8.34E-07 | 7.42E-05 | -9.50921 |

|     |         |         |          |          |          |
|-----|---------|---------|----------|----------|----------|
| 180 | 0.1     | 0.06475 | 8.09E-07 | 7.42E-05 | -9.50887 |
| 182 | 0.102   | 0.0665  | 8.31E-07 | 7.42E-05 | -9.50917 |
| 184 | 0.10375 | 0.06825 | 8.53E-07 | 7.41E-05 | -9.50946 |
| 186 | 0.105   | 0.07    | 8.75E-07 | 7.41E-05 | -9.50976 |
| 188 | 0.1065  | 0.071   | 8.88E-07 | 7.41E-05 | -9.50993 |
| 190 | 0.107   | 0.072   | 9E-07    | 7.41E-05 | -9.5101  |
| 192 | 0.10875 | 0.0725  | 9.06E-07 | 7.41E-05 | -9.51018 |
| 194 | 0.10975 | 0.07475 | 9.34E-07 | 7.41E-05 | -9.51056 |
| 196 | 0.11075 | 0.075   | 9.38E-07 | 7.41E-05 | -9.5106  |
| 198 | 0.1125  | 0.07525 | 9.41E-07 | 7.41E-05 | -9.51064 |
| 200 | 0.113   | 0.07725 | 9.66E-07 | 7.4E-05  | -9.51098 |
| 202 | 0.1145  | 0.079   | 9.88E-07 | 7.4E-05  | -9.51128 |
| 204 | 0.11525 | 0.07925 | 9.91E-07 | 7.4E-05  | -9.51132 |
| 206 | 0.1165  | 0.07975 | 9.97E-07 | 7.4E-05  | -9.5114  |
| 208 | 0.1165  | 0.07875 | 9.84E-07 | 7.4E-05  | -9.51123 |
| 210 | 0.118   | 0.0805  | 1.01E-06 | 7.4E-05  | -9.51153 |
| 212 | 0.11975 | 0.08225 | 1.03E-06 | 7.4E-05  | -9.51183 |
| 214 | 0.121   | 0.08425 | 1.05E-06 | 7.39E-05 | -9.51216 |
| 216 | 0.12125 | 0.08425 | 1.05E-06 | 7.39E-05 | -9.51216 |
| 218 | 0.12275 | 0.08525 | 1.07E-06 | 7.39E-05 | -9.51233 |
| 220 | 0.12425 | 0.087   | 1.09E-06 | 7.39E-05 | -9.51263 |
| 222 | 0.1255  | 0.0875  | 1.09E-06 | 7.39E-05 | -9.51271 |
| 224 | 0.126   | 0.08825 | 1.1E-06  | 7.39E-05 | -9.51284 |
| 226 | 0.128   | 0.09    | 1.13E-06 | 7.39E-05 | -9.51314 |
| 228 | 0.1285  | 0.09    | 1.13E-06 | 7.39E-05 | -9.51314 |
| 230 | 0.12875 | 0.0905  | 1.13E-06 | 7.39E-05 | -9.51322 |
| 232 | 0.13075 | 0.09175 | 1.15E-06 | 7.39E-05 | -9.51343 |
| 234 | 0.13075 | 0.091   | 1.14E-06 | 7.39E-05 | -9.51331 |
| 236 | 0.1325  | 0.094   | 1.18E-06 | 7.38E-05 | -9.51381 |
| 238 | 0.133   | 0.09275 | 1.16E-06 | 7.38E-05 | -9.5136  |
| 240 | 0.1345  | 0.09475 | 1.18E-06 | 7.38E-05 | -9.51394 |
| 242 | 0.13525 | 0.0945  | 1.18E-06 | 7.38E-05 | -9.5139  |
| 244 | 0.13575 | 0.096   | 1.2E-06  | 7.38E-05 | -9.51415 |
| 246 | 0.13825 | 0.09875 | 1.23E-06 | 7.38E-05 | -9.51462 |
| 248 | 0.139   | 0.09825 | 1.23E-06 | 7.38E-05 | -9.51453 |
| 250 | 0.14    | 0.1     | 1.25E-06 | 7.38E-05 | -9.51483 |
| 252 | 0.142   | 0.1015  | 1.27E-06 | 7.37E-05 | -9.51508 |
| 254 | 0.14225 | 0.10175 | 1.27E-06 | 7.37E-05 | -9.51513 |
| 256 | 0.144   | 0.10175 | 1.27E-06 | 7.37E-05 | -9.51513 |
| 258 | 0.14375 | 0.101   | 1.26E-06 | 7.37E-05 | -9.515   |
| 260 | 0.145   | 0.102   | 1.28E-06 | 7.37E-05 | -9.51517 |
| 262 | 0.14575 | 0.10175 | 1.27E-06 | 7.37E-05 | -9.51513 |
| 264 | 0.14825 | 0.104   | 1.3E-06  | 7.37E-05 | -9.51551 |
| 266 | 0.148   | 0.106   | 1.33E-06 | 7.37E-05 | -9.51585 |
| 268 | 0.14975 | 0.10575 | 1.32E-06 | 7.37E-05 | -9.5158  |
| 270 | 0.15075 | 0.107   | 1.34E-06 | 7.37E-05 | -9.51602 |

|     |         |         |          |          |          |
|-----|---------|---------|----------|----------|----------|
| 272 | 0.155   | 0.11    | 1.38E-06 | 7.36E-05 | -9.51653 |
| 274 | 0.15275 | 0.108   | 1.35E-06 | 7.37E-05 | -9.51619 |
| 276 | 0.154   | 0.11125 | 1.39E-06 | 7.36E-05 | -9.51674 |
| 278 | 0.1545  | 0.1095  | 1.37E-06 | 7.36E-05 | -9.51644 |
| 280 | 0.16    | 0.11475 | 1.43E-06 | 7.36E-05 | -9.51733 |
| 282 | 0.15925 | 0.1145  | 1.43E-06 | 7.36E-05 | -9.51729 |
| 284 | 0.1585  | 0.114   | 1.43E-06 | 7.36E-05 | -9.51721 |
| 286 | 0.15925 | 0.11425 | 1.43E-06 | 7.36E-05 | -9.51725 |
| 288 | 0.16075 | 0.114   | 1.43E-06 | 7.36E-05 | -9.51721 |
| 290 | 0.162   | 0.11675 | 1.46E-06 | 7.35E-05 | -9.51767 |
| 292 | 0.16225 | 0.1155  | 1.44E-06 | 7.36E-05 | -9.51746 |
| 294 | 0.1645  | 0.11775 | 1.47E-06 | 7.35E-05 | -9.51784 |
| 296 | 0.1645  | 0.11725 | 1.47E-06 | 7.35E-05 | -9.51776 |
| 298 | 0.16625 | 0.11825 | 1.48E-06 | 7.35E-05 | -9.51793 |

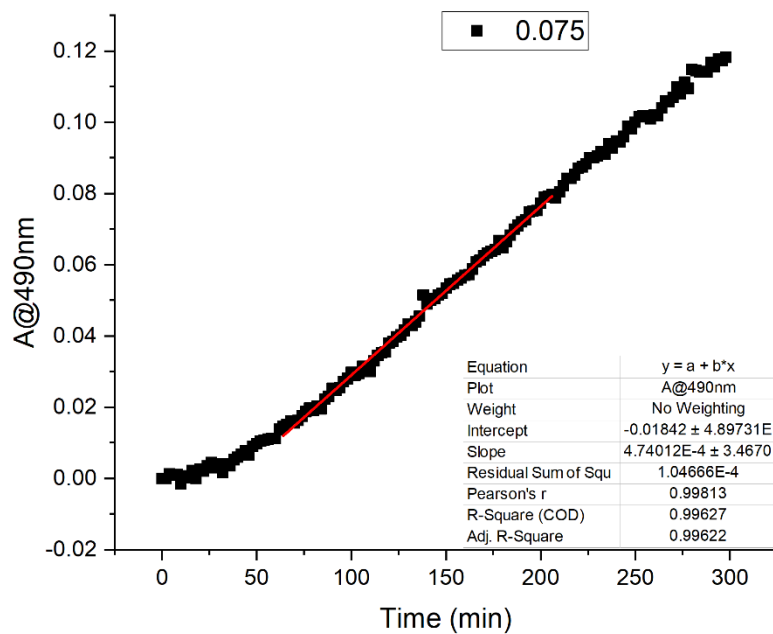

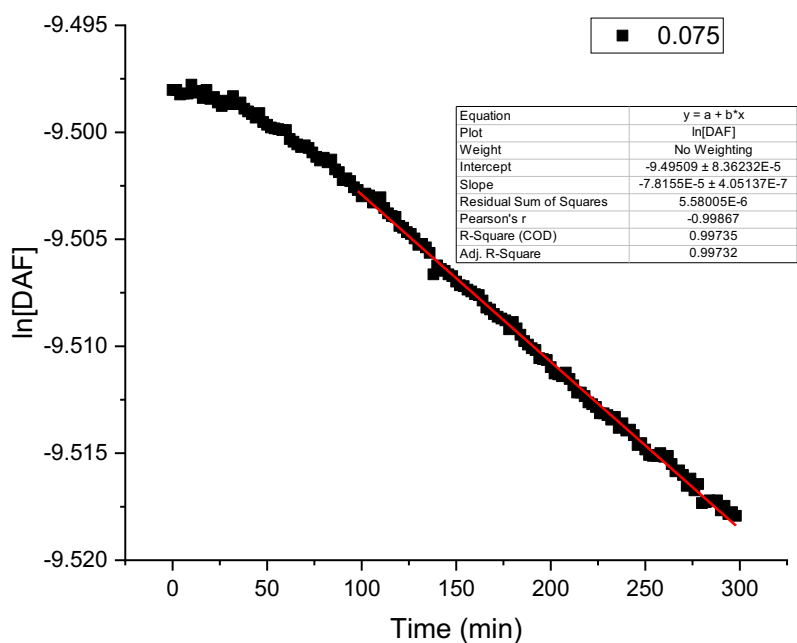

0.100 mM DAF

| Time (min) | A@490nm minus BK | set to 0 | [FLU] (M) | [DAF] (M) | ln[DAF]  |
|------------|------------------|----------|-----------|-----------|----------|
| 0          | 0.01             | 0        | 0         | 0.0001    | -9.21034 |
| 2          | 0.009            | -0.001   | -1.3E-08  | 0.0001    | -9.21022 |
| 4          | 0.00875          | -0.00125 | -1.6E-08  | 0.0001    | -9.21018 |
| 6          | 0.00875          | -0.00125 | -1.6E-08  | 0.0001    | -9.21018 |
| 8          | 0.01025          | 0.00025  | 3.12E-09  | 1E-04     | -9.21037 |
| 10         | 0.0095           | -0.0005  | -6.2E-09  | 0.0001    | -9.21028 |
| 12         | 0.0095           | -0.0005  | -6.3E-09  | 0.0001    | -9.21028 |
| 14         | 0.0085           | -0.0015  | -1.9E-08  | 0.0001    | -9.21015 |
| 16         | 0.0105           | 0.0005   | 6.25E-09  | 1E-04     | -9.2104  |
| 18         | 0.00975          | -0.00025 | -3.1E-09  | 0.0001    | -9.21031 |
| 20         | 0.0105           | 0.0005   | 6.25E-09  | 1E-04     | -9.2104  |
| 22         | 0.0105           | 0.0005   | 6.25E-09  | 1E-04     | -9.2104  |
| 24         | 0.011            | 0.001    | 1.25E-08  | 1E-04     | -9.21047 |
| 26         | 0.0115           | 0.0015   | 1.88E-08  | 1E-04     | -9.21053 |
| 28         | 0.01125          | 0.00125  | 1.56E-08  | 1E-04     | -9.2105  |
| 30         | 0.01175          | 0.00175  | 2.19E-08  | 1E-04     | -9.21056 |
| 32         | 0.011            | 0.001    | 1.25E-08  | 1E-04     | -9.21047 |
| 34         | 0.013            | 0.003    | 3.75E-08  | 1E-04     | -9.21072 |
| 36         | 0.0125           | 0.0025   | 3.13E-08  | 1E-04     | -9.21065 |
| 38         | 0.0135           | 0.0035   | 4.38E-08  | 1E-04     | -9.21078 |
| 40         | 0.01175          | 0.00175  | 2.19E-08  | 1E-04     | -9.21056 |
| 42         | 0.00125          | -0.00875 | -1.1E-07  | 0.0001    | -9.20925 |
| 44         | 0.01375          | 0.00375  | 4.69E-08  | 1E-04     | -9.21081 |
| 46         | 0.013            | 0.003    | 3.75E-08  | 1E-04     | -9.21072 |
| 48         | 0.017            | 0.007    | 8.75E-08  | 9.99E-05  | -9.21122 |



|     |         |         |          |          |          |
|-----|---------|---------|----------|----------|----------|
| 50  | 0.01675 | 0.00675 | 8.44E-08 | 9.99E-05 | -9.21118 |
| 52  | 0.018   | 0.008   | 1E-07    | 9.99E-05 | -9.21134 |
| 54  | 0.0185  | 0.0085  | 1.06E-07 | 9.99E-05 | -9.2114  |
| 56  | 0.019   | 0.009   | 1.13E-07 | 9.99E-05 | -9.21147 |
| 58  | 0.019   | 0.009   | 1.13E-07 | 9.99E-05 | -9.21147 |
| 60  | 0.018   | 0.008   | 1E-07    | 9.99E-05 | -9.21134 |
| 62  | 0.02075 | 0.01075 | 1.34E-07 | 9.99E-05 | -9.21169 |
| 64  | 0.02    | 0.01    | 1.25E-07 | 9.99E-05 | -9.21159 |
| 66  | 0.022   | 0.012   | 1.5E-07  | 9.99E-05 | -9.21184 |
| 68  | 0.0225  | 0.0125  | 1.56E-07 | 9.98E-05 | -9.2119  |
| 70  | 0.02325 | 0.01325 | 1.66E-07 | 9.98E-05 | -9.212   |
| 72  | 0.024   | 0.014   | 1.75E-07 | 9.98E-05 | -9.21209 |
| 74  | 0.0255  | 0.0155  | 1.94E-07 | 9.98E-05 | -9.21228 |
| 76  | 0.0265  | 0.0165  | 2.06E-07 | 9.98E-05 | -9.21241 |
| 78  | 0.02175 | 0.01175 | 1.47E-07 | 9.99E-05 | -9.21181 |
| 80  | 0.0255  | 0.0155  | 1.94E-07 | 9.98E-05 | -9.21228 |
| 82  | 0.027   | 0.017   | 2.13E-07 | 9.98E-05 | -9.21247 |
| 84  | 0.02625 | 0.01625 | 2.03E-07 | 9.98E-05 | -9.21237 |
| 86  | 0.0285  | 0.0185  | 2.31E-07 | 9.98E-05 | -9.21266 |
| 88  | 0.0305  | 0.0205  | 2.56E-07 | 9.97E-05 | -9.21291 |
| 90  | 0.03375 | 0.02375 | 2.97E-07 | 9.97E-05 | -9.21331 |
| 92  | 0.03375 | 0.02375 | 2.97E-07 | 9.97E-05 | -9.21331 |
| 94  | 0.0345  | 0.0245  | 3.06E-07 | 9.97E-05 | -9.21341 |
| 96  | 0.0365  | 0.0265  | 3.31E-07 | 9.97E-05 | -9.21366 |
| 98  | 0.0365  | 0.0265  | 3.31E-07 | 9.97E-05 | -9.21366 |
| 100 | 0.037   | 0.027   | 3.38E-07 | 9.97E-05 | -9.21372 |
| 102 | 0.0385  | 0.0285  | 3.56E-07 | 9.96E-05 | -9.21391 |
| 104 | 0.0385  | 0.0285  | 3.56E-07 | 9.96E-05 | -9.21391 |
| 106 | 0.04025 | 0.03025 | 3.78E-07 | 9.96E-05 | -9.21413 |
| 108 | 0.04075 | 0.03075 | 3.84E-07 | 9.96E-05 | -9.21419 |
| 110 | 0.04075 | 0.03075 | 3.84E-07 | 9.96E-05 | -9.21419 |
| 112 | 0.04175 | 0.03175 | 3.97E-07 | 9.96E-05 | -9.21432 |
| 114 | 0.044   | 0.034   | 4.25E-07 | 9.96E-05 | -9.2146  |
| 116 | 0.0435  | 0.0335  | 4.19E-07 | 9.96E-05 | -9.21454 |
| 118 | 0.04375 | 0.03375 | 4.22E-07 | 9.96E-05 | -9.21457 |
| 120 | 0.0465  | 0.0365  | 4.56E-07 | 9.95E-05 | -9.21491 |
| 122 | 0.047   | 0.037   | 4.63E-07 | 9.95E-05 | -9.21498 |
| 124 | 0.0485  | 0.0385  | 4.81E-07 | 9.95E-05 | -9.21516 |
| 126 | 0.0495  | 0.0395  | 4.94E-07 | 9.95E-05 | -9.21529 |
| 128 | 0.0505  | 0.0405  | 5.06E-07 | 9.95E-05 | -9.21542 |
| 130 | 0.051   | 0.041   | 5.13E-07 | 9.95E-05 | -9.21548 |
| 132 | 0.053   | 0.043   | 5.38E-07 | 9.95E-05 | -9.21573 |
| 134 | 0.053   | 0.043   | 5.38E-07 | 9.95E-05 | -9.21573 |
| 136 | 0.054   | 0.044   | 5.5E-07  | 9.95E-05 | -9.21586 |
| 138 | 0.06    | 0.05    | 6.25E-07 | 9.94E-05 | -9.21661 |
| 140 | 0.05675 | 0.04675 | 5.84E-07 | 9.94E-05 | -9.2162  |

|     |         |         |          |          |          |
|-----|---------|---------|----------|----------|----------|
| 142 | 0.057   | 0.047   | 5.88E-07 | 9.94E-05 | -9.21623 |
| 144 | 0.058   | 0.048   | 6E-07    | 9.94E-05 | -9.21636 |
| 146 | 0.0595  | 0.0495  | 6.19E-07 | 9.94E-05 | -9.21655 |
| 148 | 0.06025 | 0.05025 | 6.28E-07 | 9.94E-05 | -9.21664 |
| 150 | 0.04625 | 0.03625 | 4.53E-07 | 9.95E-05 | -9.21488 |
| 152 | 0.0625  | 0.0525  | 6.56E-07 | 9.93E-05 | -9.21692 |
| 154 | 0.063   | 0.053   | 6.63E-07 | 9.93E-05 | -9.21699 |
| 156 | 0.0645  | 0.0545  | 6.81E-07 | 9.93E-05 | -9.21718 |
| 158 | 0.06675 | 0.05675 | 7.09E-07 | 9.93E-05 | -9.21746 |
| 160 | 0.06525 | 0.05525 | 6.91E-07 | 9.93E-05 | -9.21727 |
| 162 | 0.0665  | 0.0565  | 7.06E-07 | 9.93E-05 | -9.21743 |
| 164 | 0.06825 | 0.05825 | 7.28E-07 | 9.93E-05 | -9.21765 |
| 166 | 0.06975 | 0.05975 | 7.47E-07 | 9.93E-05 | -9.21784 |
| 168 | 0.07025 | 0.06025 | 7.53E-07 | 9.92E-05 | -9.2179  |
| 170 | 0.072   | 0.062   | 7.75E-07 | 9.92E-05 | -9.21812 |
| 172 | 0.07175 | 0.06175 | 7.72E-07 | 9.92E-05 | -9.21809 |
| 174 | 0.07425 | 0.06425 | 8.03E-07 | 9.92E-05 | -9.2184  |
| 176 | 0.0745  | 0.0645  | 8.06E-07 | 9.92E-05 | -9.21844 |
| 178 | 0.0765  | 0.0665  | 8.31E-07 | 9.92E-05 | -9.21869 |
| 180 | 0.07525 | 0.06525 | 8.16E-07 | 9.92E-05 | -9.21853 |
| 182 | 0.077   | 0.067   | 8.38E-07 | 9.92E-05 | -9.21875 |
| 184 | 0.07975 | 0.06975 | 8.72E-07 | 9.91E-05 | -9.2191  |
| 186 | 0.08025 | 0.07025 | 8.78E-07 | 9.91E-05 | -9.21916 |
| 188 | 0.0815  | 0.0715  | 8.94E-07 | 9.91E-05 | -9.21932 |
| 190 | 0.082   | 0.072   | 9E-07    | 9.91E-05 | -9.21938 |
| 192 | 0.08325 | 0.07325 | 9.16E-07 | 9.91E-05 | -9.21954 |
| 194 | 0.08325 | 0.07325 | 9.16E-07 | 9.91E-05 | -9.21954 |
| 196 | 0.084   | 0.074   | 9.25E-07 | 9.91E-05 | -9.21963 |
| 198 | 0.08675 | 0.07675 | 9.59E-07 | 9.9E-05  | -9.21998 |
| 200 | 0.0865  | 0.0765  | 9.56E-07 | 9.9E-05  | -9.21995 |
| 202 | 0.089   | 0.079   | 9.88E-07 | 9.9E-05  | -9.22026 |
| 204 | 0.0895  | 0.0795  | 9.94E-07 | 9.9E-05  | -9.22033 |
| 206 | 0.09025 | 0.08025 | 1E-06    | 9.9E-05  | -9.22042 |
| 208 | 0.09125 | 0.08125 | 1.02E-06 | 9.9E-05  | -9.22055 |
| 210 | 0.0925  | 0.0825  | 1.03E-06 | 9.9E-05  | -9.22071 |
| 212 | 0.09225 | 0.08225 | 1.03E-06 | 9.9E-05  | -9.22067 |
| 214 | 0.0945  | 0.0845  | 1.06E-06 | 9.89E-05 | -9.22096 |
| 216 | 0.096   | 0.086   | 1.08E-06 | 9.89E-05 | -9.22115 |
| 218 | 0.09625 | 0.08625 | 1.08E-06 | 9.89E-05 | -9.22118 |
| 220 | 0.09875 | 0.08875 | 1.11E-06 | 9.89E-05 | -9.2215  |
| 222 | 0.09975 | 0.08975 | 1.12E-06 | 9.89E-05 | -9.22162 |
| 224 | 0.101   | 0.091   | 1.14E-06 | 9.89E-05 | -9.22178 |
| 226 | 0.10175 | 0.09175 | 1.15E-06 | 9.89E-05 | -9.22188 |
| 228 | 0.102   | 0.092   | 1.15E-06 | 9.89E-05 | -9.22191 |
| 230 | 0.104   | 0.094   | 1.18E-06 | 9.88E-05 | -9.22216 |
| 232 | 0.1035  | 0.0935  | 1.17E-06 | 9.88E-05 | -9.2221  |

|     |         |         |          |          |          |
|-----|---------|---------|----------|----------|----------|
| 234 | 0.1045  | 0.0945  | 1.18E-06 | 9.88E-05 | -9.22222 |
| 236 | 0.10775 | 0.09775 | 1.22E-06 | 9.88E-05 | -9.22263 |
| 238 | 0.10625 | 0.09625 | 1.2E-06  | 9.88E-05 | -9.22244 |
| 240 | 0.1075  | 0.0975  | 1.22E-06 | 9.88E-05 | -9.2226  |
| 242 | 0.10875 | 0.09875 | 1.23E-06 | 9.88E-05 | -9.22276 |
| 244 | 0.109   | 0.099   | 1.24E-06 | 9.88E-05 | -9.22279 |
| 246 | 0.11175 | 0.10175 | 1.27E-06 | 9.87E-05 | -9.22314 |
| 248 | 0.113   | 0.103   | 1.29E-06 | 9.87E-05 | -9.2233  |
| 250 | 0.11325 | 0.10325 | 1.29E-06 | 9.87E-05 | -9.22333 |
| 252 | 0.11475 | 0.10475 | 1.31E-06 | 9.87E-05 | -9.22352 |
| 254 | 0.11625 | 0.10625 | 1.33E-06 | 9.87E-05 | -9.22371 |
| 256 | 0.11625 | 0.10625 | 1.33E-06 | 9.87E-05 | -9.22371 |
| 258 | 0.11675 | 0.10675 | 1.33E-06 | 9.87E-05 | -9.22377 |
| 260 | 0.11775 | 0.10775 | 1.35E-06 | 9.87E-05 | -9.2239  |
| 262 | 0.11875 | 0.10875 | 1.36E-06 | 9.86E-05 | -9.22403 |
| 264 | 0.11925 | 0.10925 | 1.37E-06 | 9.86E-05 | -9.22409 |
| 266 | 0.1215  | 0.1115  | 1.39E-06 | 9.86E-05 | -9.22438 |
| 268 | 0.12175 | 0.11175 | 1.4E-06  | 9.86E-05 | -9.22441 |
| 270 | 0.12175 | 0.11175 | 1.4E-06  | 9.86E-05 | -9.22441 |
| 272 | 0.12225 | 0.11225 | 1.4E-06  | 9.86E-05 | -9.22447 |
| 274 | 0.122   | 0.112   | 1.4E-06  | 9.86E-05 | -9.22444 |
| 276 | 0.12375 | 0.11375 | 1.42E-06 | 9.86E-05 | -9.22466 |
| 278 | 0.125   | 0.115   | 1.44E-06 | 9.86E-05 | -9.22482 |
| 280 | 0.126   | 0.116   | 1.45E-06 | 9.86E-05 | -9.22495 |
| 282 | 0.12825 | 0.11825 | 1.48E-06 | 9.85E-05 | -9.22523 |
| 284 | 0.12775 | 0.11775 | 1.47E-06 | 9.85E-05 | -9.22517 |
| 286 | 0.12875 | 0.11875 | 1.48E-06 | 9.85E-05 | -9.2253  |
| 288 | 0.12925 | 0.11925 | 1.49E-06 | 9.85E-05 | -9.22536 |
| 290 | 0.13075 | 0.12075 | 1.51E-06 | 9.85E-05 | -9.22555 |
| 292 | 0.1315  | 0.1215  | 1.52E-06 | 9.85E-05 | -9.22564 |
| 294 | 0.13225 | 0.12225 | 1.53E-06 | 9.85E-05 | -9.22574 |
| 296 | 0.13275 | 0.12275 | 1.53E-06 | 9.85E-05 | -9.2258  |
| 298 | 0.13225 | 0.12225 | 1.53E-06 | 9.85E-05 | -9.22574 |

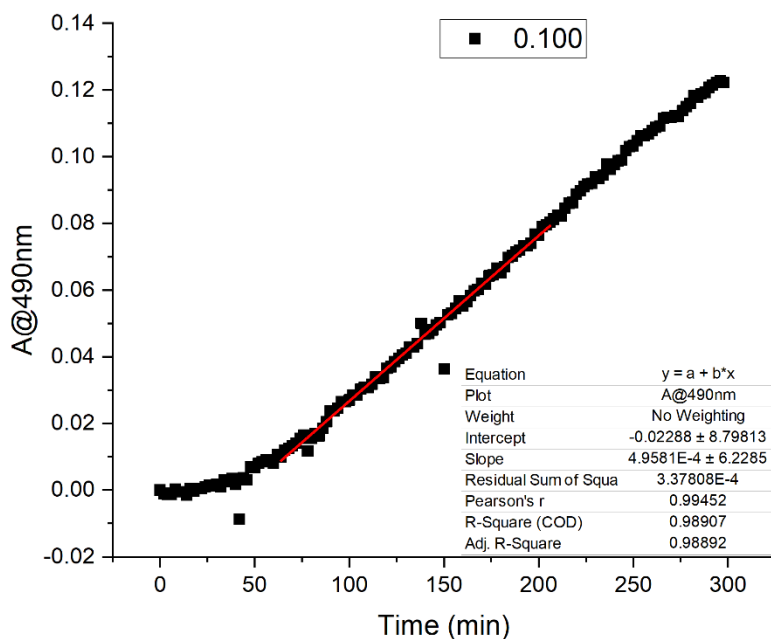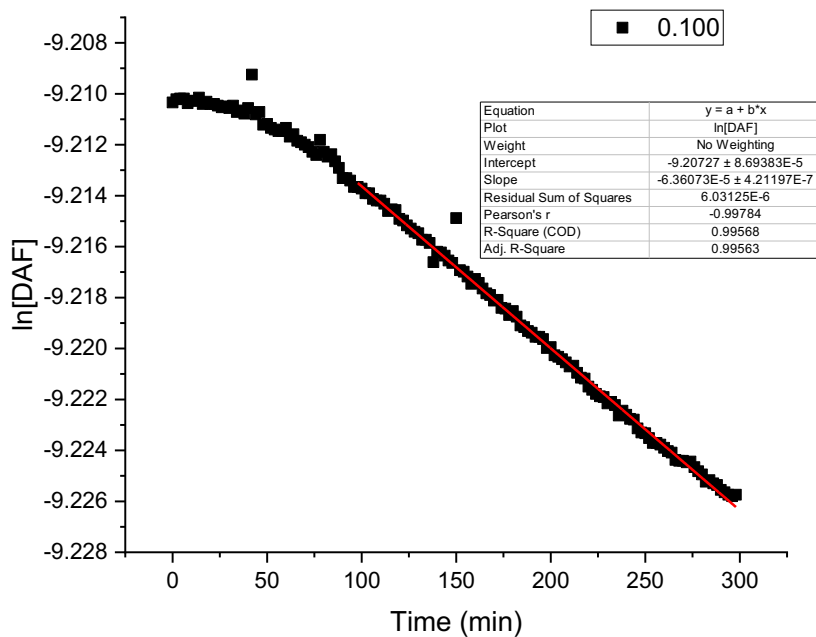

0.125 mM DAF

| Time (min) | A@490nm minus BK | set to 0 | [FLU] (M) | [DAF] (M) | ln[DAF]  |
|------------|------------------|----------|-----------|-----------|----------|
| 0          | 0.041            | 0        | 0         | 0.000125  | -8.9872  |
| 2          | 0.04125          | 0.0015   | 1.88E-08  | 0.000125  | -8.98735 |
| 4          | 0.0395           | 0.00275  | 3.44E-08  | 0.000125  | -8.98747 |
| 6          | 0.04025          | 0.004    | 5E-08     | 0.000125  | -8.9876  |
| 8          | 0.04075          | 0.00725  | 9.06E-08  | 0.000125  | -8.98792 |
| 10         | 0.04025          | 0.008    | 1E-07     | 0.000125  | -8.988   |

|     |         |         |          |          |          |
|-----|---------|---------|----------|----------|----------|
| 12  | 0.04175 | 0.009   | 1.13E-07 | 0.000125 | -8.9881  |
| 14  | 0.04025 | 0.00725 | 9.06E-08 | 0.000125 | -8.98792 |
| 16  | 0.041   | 0.0055  | 6.88E-08 | 0.000125 | -8.98775 |
| 18  | 0.0415  | 0.0075  | 9.38E-08 | 0.000125 | -8.98795 |
| 20  | 0.0415  | 0.01225 | 1.53E-07 | 0.000125 | -8.98842 |
| 22  | 0.0405  | 0.00975 | 1.22E-07 | 0.000125 | -8.98817 |
| 24  | 0.041   | 0.0085  | 1.06E-07 | 0.000125 | -8.98805 |
| 26  | 0.04225 | 0.00975 | 1.22E-07 | 0.000125 | -8.98817 |
| 28  | 0.042   | 0.01125 | 1.41E-07 | 0.000125 | -8.98832 |
| 30  | 0.04375 | 0.0115  | 1.44E-07 | 0.000125 | -8.98835 |
| 32  | 0.04375 | 0.01175 | 1.47E-07 | 0.000125 | -8.98837 |
| 34  | 0.04475 | 0.014   | 1.75E-07 | 0.000125 | -8.9886  |
| 36  | 0.04475 | 0.0125  | 1.56E-07 | 0.000125 | -8.98845 |
| 38  | 0.0455  | 0.01475 | 1.84E-07 | 0.000125 | -8.98867 |
| 40  | 0.04625 | 0.01575 | 1.97E-07 | 0.000125 | -8.98877 |
| 42  | 0.048   | 0.01725 | 2.16E-07 | 0.000125 | -8.98892 |
| 44  | 0.049   | 0.01775 | 2.22E-07 | 0.000125 | -8.98897 |
| 46  | 0.0485  | 0.0175  | 2.19E-07 | 0.000125 | -8.98895 |
| 48  | 0.05025 | 0.0195  | 2.44E-07 | 0.000125 | -8.98915 |
| 50  | 0.0505  | 0.0195  | 2.44E-07 | 0.000125 | -8.98915 |
| 52  | 0.051   | 0.0205  | 2.56E-07 | 0.000125 | -8.98925 |
| 54  | 0.05325 | 0.021   | 2.63E-07 | 0.000125 | -8.9893  |
| 56  | 0.05375 | 0.022   | 2.75E-07 | 0.000125 | -8.9894  |
| 58  | 0.05475 | 0.022   | 2.75E-07 | 0.000125 | -8.9894  |
| 60  | 0.0555  | 0.02475 | 3.09E-07 | 0.000125 | -8.98967 |
| 62  | 0.05625 | 0.0245  | 3.06E-07 | 0.000125 | -8.98965 |
| 64  | 0.0575  | 0.0255  | 3.19E-07 | 0.000125 | -8.98975 |
| 66  | 0.0575  | 0.025   | 3.13E-07 | 0.000125 | -8.9897  |
| 68  | 0.058   | 0.026   | 3.25E-07 | 0.000125 | -8.9898  |
| 70  | 0.059   | 0.02625 | 3.28E-07 | 0.000125 | -8.98983 |
| 72  | 0.05975 | 0.027   | 3.38E-07 | 0.000125 | -8.9899  |
| 74  | 0.06175 | 0.02875 | 3.59E-07 | 0.000125 | -8.99008 |
| 76  | 0.06325 | 0.02975 | 3.72E-07 | 0.000125 | -8.99018 |
| 78  | 0.064   | 0.0315  | 3.94E-07 | 0.000125 | -8.99035 |
| 80  | 0.0645  | 0.031   | 3.88E-07 | 0.000125 | -8.9903  |
| 82  | 0.066   | 0.03275 | 4.09E-07 | 0.000125 | -8.99048 |
| 84  | 0.06525 | 0.03075 | 3.84E-07 | 0.000125 | -8.99028 |
| 86  | 0.06875 | 0.03525 | 4.41E-07 | 0.000125 | -8.99073 |
| 88  | 0.06975 | 0.035   | 4.38E-07 | 0.000125 | -8.9907  |
| 90  | 0.07175 | 0.036   | 4.5E-07  | 0.000125 | -8.9908  |
| 92  | 0.07125 | 0.036   | 4.5E-07  | 0.000125 | -8.9908  |
| 94  | 0.0725  | 0.0385  | 4.81E-07 | 0.000125 | -8.99105 |
| 96  | 0.073   | 0.0375  | 4.69E-07 | 0.000125 | -8.99095 |
| 98  | 0.07525 | 0.0405  | 5.06E-07 | 0.000124 | -8.99126 |
| 100 | 0.07525 | 0.041   | 5.13E-07 | 0.000124 | -8.99131 |
| 102 | 0.07625 | 0.0415  | 5.19E-07 | 0.000124 | -8.99136 |

|     |         |         |          |          |          |
|-----|---------|---------|----------|----------|----------|
| 104 | 0.078   | 0.04325 | 5.41E-07 | 0.000124 | -8.99153 |
| 106 | 0.0785  | 0.0425  | 5.31E-07 | 0.000124 | -8.99146 |
| 108 | 0.08    | 0.04325 | 5.41E-07 | 0.000124 | -8.99153 |
| 110 | 0.0815  | 0.039   | 4.88E-07 | 0.000125 | -8.9911  |
| 112 | 0.0825  | 0.04475 | 5.59E-07 | 0.000124 | -8.99168 |
| 114 | 0.08475 | 0.0465  | 5.81E-07 | 0.000124 | -8.99186 |
| 116 | 0.08425 | 0.047   | 5.88E-07 | 0.000124 | -8.99191 |
| 118 | 0.08575 | 0.04825 | 6.03E-07 | 0.000124 | -8.99203 |
| 120 | 0.087   | 0.04875 | 6.09E-07 | 0.000124 | -8.99208 |
| 122 | 0.089   | 0.052   | 6.5E-07  | 0.000124 | -8.99241 |
| 124 | 0.09    | 0.052   | 6.5E-07  | 0.000124 | -8.99241 |
| 126 | 0.091   | 0.054   | 6.75E-07 | 0.000124 | -8.99261 |
| 128 | 0.09275 | 0.05425 | 6.78E-07 | 0.000124 | -8.99264 |
| 130 | 0.09525 | 0.05575 | 6.97E-07 | 0.000124 | -8.99279 |
| 132 | 0.09425 | 0.05525 | 6.91E-07 | 0.000124 | -8.99274 |
| 134 | 0.097   | 0.05825 | 7.28E-07 | 0.000124 | -8.99304 |
| 136 | 0.096   | 0.0555  | 6.94E-07 | 0.000124 | -8.99276 |
| 138 | 0.099   | 0.0605  | 7.56E-07 | 0.000124 | -8.99327 |
| 140 | 0.09975 | 0.061   | 7.63E-07 | 0.000124 | -8.99332 |
| 142 | 0.10125 | 0.0615  | 7.69E-07 | 0.000124 | -8.99337 |
| 144 | 0.1025  | 0.06175 | 7.72E-07 | 0.000124 | -8.99339 |
| 146 | 0.103   | 0.06225 | 7.78E-07 | 0.000124 | -8.99344 |
| 148 | 0.10525 | 0.065   | 8.13E-07 | 0.000124 | -8.99372 |
| 150 | 0.1055  | 0.06525 | 8.16E-07 | 0.000124 | -8.99374 |
| 152 | 0.10725 | 0.06575 | 8.22E-07 | 0.000124 | -8.99379 |
| 154 | 0.1085  | 0.0675  | 8.44E-07 | 0.000124 | -8.99397 |
| 156 | 0.1095  | 0.06875 | 8.59E-07 | 0.000124 | -8.9941  |
| 158 | 0.1115  | 0.07    | 8.75E-07 | 0.000124 | -8.99422 |
| 160 | 0.11175 | 0.071   | 8.88E-07 | 0.000124 | -8.99432 |
| 162 | 0.1135  | 0.071   | 8.88E-07 | 0.000124 | -8.99432 |
| 164 | 0.115   | 0.07275 | 9.09E-07 | 0.000124 | -8.9945  |
| 166 | 0.116   | 0.073   | 9.13E-07 | 0.000124 | -8.99452 |
| 168 | 0.1175  | 0.075   | 9.38E-07 | 0.000124 | -8.99473 |
| 170 | 0.1195  | 0.0765  | 9.56E-07 | 0.000124 | -8.99488 |
| 172 | 0.11925 | 0.07675 | 9.59E-07 | 0.000124 | -8.9949  |
| 174 | 0.121   | 0.0775  | 9.69E-07 | 0.000124 | -8.99498 |
| 176 | 0.1225  | 0.07975 | 9.97E-07 | 0.000124 | -8.9952  |
| 178 | 0.1235  | 0.08025 | 1E-06    | 0.000124 | -8.99525 |
| 180 | 0.1235  | 0.081   | 1.01E-06 | 0.000124 | -8.99533 |
| 182 | 0.12625 | 0.08275 | 1.03E-06 | 0.000124 | -8.99551 |
| 184 | 0.12825 | 0.0845  | 1.06E-06 | 0.000124 | -8.99568 |
| 186 | 0.129   | 0.08575 | 1.07E-06 | 0.000124 | -8.99581 |
| 188 | 0.1305  | 0.087   | 1.09E-06 | 0.000124 | -8.99593 |
| 190 | 0.13325 | 0.0885  | 1.11E-06 | 0.000124 | -8.99609 |
| 192 | 0.1335  | 0.09025 | 1.13E-06 | 0.000124 | -8.99626 |
| 194 | 0.135   | 0.09175 | 1.15E-06 | 0.000124 | -8.99641 |

|     |         |         |          |          |          |
|-----|---------|---------|----------|----------|----------|
| 196 | 0.13575 | 0.091   | 1.14E-06 | 0.000124 | -8.99634 |
| 198 | 0.13725 | 0.063   | 7.88E-07 | 0.000124 | -8.99352 |
| 200 | 0.13875 | 0.094   | 1.18E-06 | 0.000124 | -8.99664 |
| 202 | 0.1395  | 0.06925 | 8.66E-07 | 0.000124 | -8.99415 |
| 204 | 0.13975 | 0.09525 | 1.19E-06 | 0.000124 | -8.99677 |
| 206 | 0.14275 | 0.09825 | 1.23E-06 | 0.000124 | -8.99707 |
| 208 | 0.14375 | 0.0985  | 1.23E-06 | 0.000124 | -8.9971  |
| 210 | 0.14425 | 0.09925 | 1.24E-06 | 0.000124 | -8.99717 |
| 212 | 0.14575 | 0.1     | 1.25E-06 | 0.000124 | -8.99725 |
| 214 | 0.148   | 0.104   | 1.3E-06  | 0.000124 | -8.99765 |
| 216 | 0.1485  | 0.09675 | 1.21E-06 | 0.000124 | -8.99692 |
| 218 | 0.1495  | 0.10425 | 1.3E-06  | 0.000124 | -8.99768 |
| 220 | 0.15175 | 0.092   | 1.15E-06 | 0.000124 | -8.99644 |
| 222 | 0.15175 | 0.10625 | 1.33E-06 | 0.000124 | -8.99788 |
| 224 | 0.15475 | 0.10875 | 1.36E-06 | 0.000124 | -8.99813 |
| 226 | 0.15575 | 0.099   | 1.24E-06 | 0.000124 | -8.99715 |
| 228 | 0.15675 | 0.11125 | 1.39E-06 | 0.000124 | -8.99838 |
| 230 | 0.1575  | 0.1115  | 1.39E-06 | 0.000124 | -8.99841 |
| 232 | 0.15925 | 0.11375 | 1.42E-06 | 0.000124 | -8.99864 |
| 234 | 0.15925 | 0.11375 | 1.42E-06 | 0.000124 | -8.99864 |
| 236 | 0.16225 | 0.11525 | 1.44E-06 | 0.000124 | -8.99879 |
| 238 | 0.16275 | 0.1165  | 1.46E-06 | 0.000124 | -8.99892 |
| 240 | 0.1645  | 0.11825 | 1.48E-06 | 0.000124 | -8.99909 |
| 242 | 0.16625 | 0.1195  | 1.49E-06 | 0.000124 | -8.99922 |
| 244 | 0.16675 | 0.12075 | 1.51E-06 | 0.000123 | -8.99935 |
| 246 | 0.16925 | 0.12275 | 1.53E-06 | 0.000123 | -8.99955 |
| 248 | 0.16975 | 0.1235  | 1.54E-06 | 0.000123 | -8.99962 |
| 250 | 0.1715  | 0.12475 | 1.56E-06 | 0.000123 | -8.99975 |
| 252 | 0.17325 | 0.12675 | 1.58E-06 | 0.000123 | -8.99995 |
| 254 | 0.17425 | 0.12775 | 1.6E-06  | 0.000123 | -9.00005 |
| 256 | 0.17575 | 0.12825 | 1.6E-06  | 0.000123 | -9.0001  |
| 258 | 0.1765  | 0.129   | 1.61E-06 | 0.000123 | -9.00018 |
| 260 | 0.17725 | 0.13075 | 1.63E-06 | 0.000123 | -9.00036 |
| 262 | 0.17925 | 0.131   | 1.64E-06 | 0.000123 | -9.00038 |
| 264 | 0.182   | 0.134   | 1.68E-06 | 0.000123 | -9.00069 |
| 266 | 0.18175 | 0.1345  | 1.68E-06 | 0.000123 | -9.00074 |
| 268 | 0.184   | 0.13575 | 1.7E-06  | 0.000123 | -9.00086 |
| 270 | 0.1855  | 0.1375  | 1.72E-06 | 0.000123 | -9.00104 |
| 272 | 0.18625 | 0.13775 | 1.72E-06 | 0.000123 | -9.00107 |
| 274 | 0.18825 | 0.1395  | 1.74E-06 | 0.000123 | -9.00125 |
| 276 | 0.18825 | 0.1395  | 1.74E-06 | 0.000123 | -9.00125 |
| 278 | 0.1905  | 0.14125 | 1.77E-06 | 0.000123 | -9.00142 |
| 280 | 0.1925  | 0.144   | 1.8E-06  | 0.000123 | -9.0017  |
| 282 | 0.19425 | 0.14475 | 1.81E-06 | 0.000123 | -9.00178 |
| 284 | 0.19425 | 0.145   | 1.81E-06 | 0.000123 | -9.0018  |
| 286 | 0.195   | 0.14625 | 1.83E-06 | 0.000123 | -9.00193 |

|     |         |         |          |          |          |
|-----|---------|---------|----------|----------|----------|
| 288 | 0.197   | 0.1475  | 1.84E-06 | 0.000123 | -9.00206 |
| 290 | 0.19925 | 0.149   | 1.86E-06 | 0.000123 | -9.00221 |
| 292 | 0.201   | 0.15275 | 1.91E-06 | 0.000123 | -9.00259 |
| 294 | 0.20175 | 0.152   | 1.9E-06  | 0.000123 | -9.00251 |
| 296 | 0.20325 | 0.1535  | 1.92E-06 | 0.000123 | -9.00267 |
| 298 | 0.2045  | 0.154   | 1.93E-06 | 0.000123 | -9.00272 |

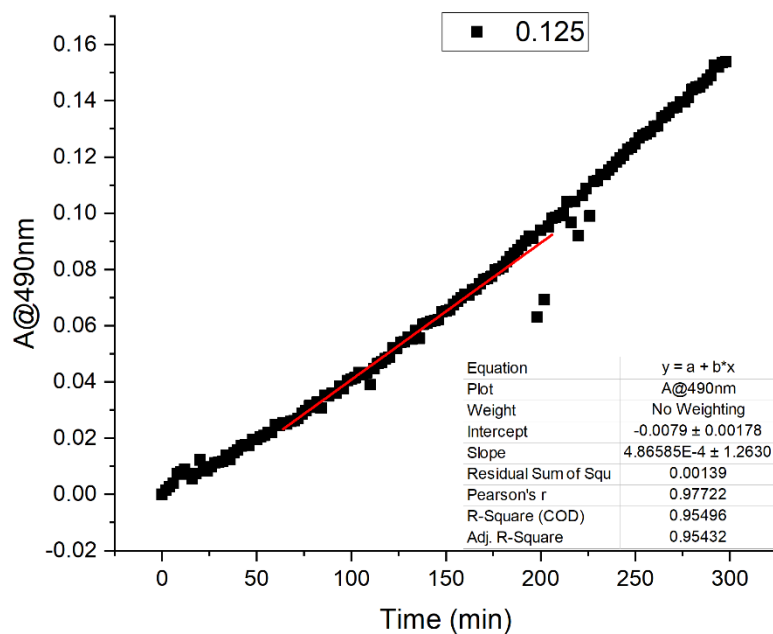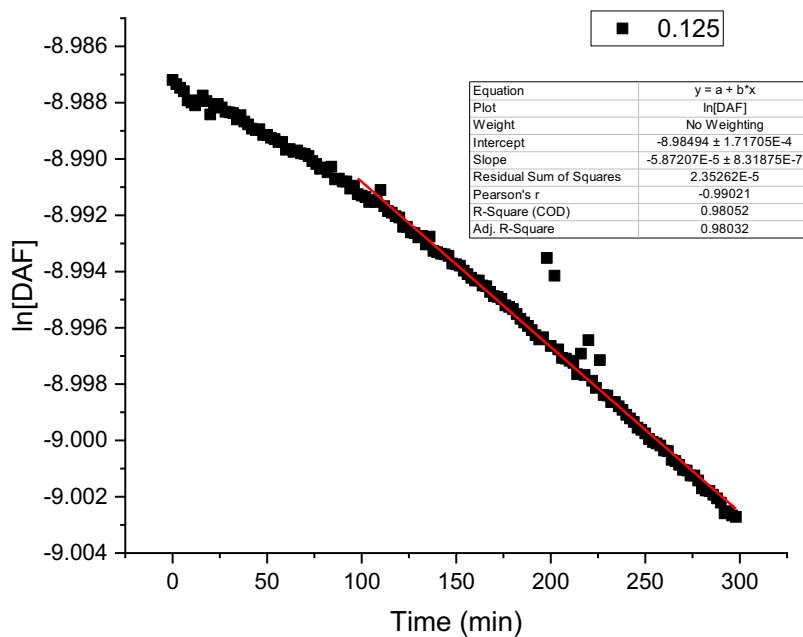



## 0.150 mM DAF

| Time (min) | A@490nm minus BK | set to 0 | [FLU] (M) | [DAF] (M) | ln[DAF]  |
|------------|------------------|----------|-----------|-----------|----------|
| 0          | 0.04075          | 0        | 0         | 0.00015   | -8.80488 |
| 2          | 0.0405           | 0.002    | 2.5E-08   | 0.00015   | -8.80504 |
| 4          | 0.0405           | 0        | 0         | 0.00015   | -8.80488 |
| 6          | 0.04025          | 0.0015   | 1.88E-08  | 0.00015   | -8.805   |
| 8          | 0.041            | 0.00125  | 1.56E-08  | 0.00015   | -8.80498 |
| 10         | 0.044            | 0.0045   | 5.63E-08  | 0.00015   | -8.80525 |
| 12         | 0.041            | 0.00225  | 2.81E-08  | 0.00015   | -8.80506 |
| 14         | 0.04             | 0.00175  | 2.19E-08  | 0.00015   | -8.80502 |
| 16         | 0.041            | 0.0035   | 4.38E-08  | 0.00015   | -8.80517 |
| 18         | 0.04075          | 7.50E-04 | 9.38E-09  | 0.00015   | -8.80494 |
| 20         | 0.04225          | 0.001    | 1.25E-08  | 0.00015   | -8.80496 |
| 22         | 0.0405           | 0.0015   | 1.88E-08  | 0.00015   | -8.805   |
| 24         | 0.04075          | 0        | 0         | 0.00015   | -8.80488 |
| 26         | 0.04275          | 0.0045   | 5.63E-08  | 0.00015   | -8.80525 |
| 28         | 0.043            | 0.005    | 6.25E-08  | 0.00015   | -8.80529 |
| 30         | 0.043            | 0.006    | 7.5E-08   | 0.00015   | -8.80538 |
| 32         | 0.0435           | 0.006    | 7.5E-08   | 0.00015   | -8.80538 |
| 34         | 0.04425          | 0.00675  | 8.44E-08  | 0.00015   | -8.80544 |
| 36         | 0.04525          | 0.0075   | 9.38E-08  | 0.00015   | -8.8055  |
| 38         | 0.04525          | 0.0075   | 9.38E-08  | 0.00015   | -8.8055  |
| 40         | 0.0455           | 0.008    | 1E-07     | 0.00015   | -8.80554 |
| 42         | 0.04775          | 0.01075  | 1.34E-07  | 0.00015   | -8.80577 |
| 44         | 0.048            | 0.01025  | 1.28E-07  | 0.00015   | -8.80573 |
| 46         | 0.0485           | 0.01     | 1.25E-07  | 0.00015   | -8.80571 |
| 48         | 0.0505           | 0.01225  | 1.53E-07  | 0.00015   | -8.8059  |
| 50         | 0.05125          | 0.0135   | 1.69E-07  | 0.00015   | -8.806   |
| 52         | 0.0505           | 0.01425  | 1.78E-07  | 0.00015   | -8.80606 |
| 54         | 0.0515           | 0.01175  | 1.47E-07  | 0.00015   | -8.80585 |
| 56         | 0.0535           | 0.014    | 1.75E-07  | 0.00015   | -8.80604 |
| 58         | 0.05375          | 0.01475  | 1.84E-07  | 0.00015   | -8.80611 |
| 60         | 0.05525          | 0.015    | 1.88E-07  | 0.00015   | -8.80613 |
| 62         | 0.05525          | 0.01625  | 2.03E-07  | 0.00015   | -8.80623 |
| 64         | 0.057            | 0.01725  | 2.16E-07  | 0.00015   | -8.80631 |
| 66         | 0.0565           | 0.01625  | 2.03E-07  | 0.00015   | -8.80623 |
| 68         | 0.0585           | 0.01775  | 2.22E-07  | 0.00015   | -8.80636 |
| 70         | 0.06025          | 0.02075  | 2.59E-07  | 0.00015   | -8.80661 |
| 72         | 0.0615           | 0.02125  | 2.66E-07  | 0.00015   | -8.80665 |
| 74         | 0.06175          | 0.0225   | 2.81E-07  | 0.00015   | -8.80675 |
| 76         | 0.0625           | 0.022    | 2.75E-07  | 0.00015   | -8.80671 |
| 78         | 0.06375          | 0.02525  | 3.16E-07  | 0.00015   | -8.80698 |
| 80         | 0.0645           | 0.0245   | 3.06E-07  | 0.00015   | -8.80692 |
| 82         | 0.067            | 0.027    | 3.38E-07  | 0.00015   | -8.80713 |
| 84         | 0.064            | 0.0235   | 2.94E-07  | 0.00015   | -8.80684 |
| 86         | 0.06925          | 0.0285   | 3.56E-07  | 0.00015   | -8.80725 |

|     |         |         |          |          |          |
|-----|---------|---------|----------|----------|----------|
| 88  | 0.0685  | 0.02875 | 3.59E-07 | 0.00015  | -8.80727 |
| 90  | 0.07025 | 0.02975 | 3.72E-07 | 0.00015  | -8.80736 |
| 92  | 0.0715  | 0.0315  | 3.94E-07 | 0.00015  | -8.8075  |
| 94  | 0.07175 | 0.03075 | 3.84E-07 | 0.00015  | -8.80744 |
| 96  | 0.074   | 0.03525 | 4.41E-07 | 0.00015  | -8.80782 |
| 98  | 0.07575 | 0.03525 | 4.41E-07 | 0.00015  | -8.80782 |
| 100 | 0.075   | 0.0345  | 4.31E-07 | 0.00015  | -8.80775 |
| 102 | 0.0765  | 0.03525 | 4.41E-07 | 0.00015  | -8.80782 |
| 104 | 0.07775 | 0.03625 | 4.53E-07 | 0.00015  | -8.8079  |
| 106 | 0.07875 | 0.0385  | 4.81E-07 | 0.00015  | -8.80809 |
| 108 | 0.08    | 0.039   | 4.88E-07 | 0.00015  | -8.80813 |
| 110 | 0.081   | 0.03925 | 4.91E-07 | 0.00015  | -8.80815 |
| 112 | 0.082   | 0.0415  | 5.19E-07 | 0.000149 | -8.80834 |
| 114 | 0.08425 | 0.043   | 5.38E-07 | 0.000149 | -8.80847 |
| 116 | 0.08525 | 0.04325 | 5.41E-07 | 0.000149 | -8.80849 |
| 118 | 0.087   | 0.0455  | 5.69E-07 | 0.000149 | -8.80867 |
| 120 | 0.08925 | 0.048   | 6E-07    | 0.000149 | -8.80888 |
| 122 | 0.08925 | 0.04725 | 5.91E-07 | 0.000149 | -8.80882 |
| 124 | 0.09075 | 0.049   | 6.13E-07 | 0.000149 | -8.80897 |
| 126 | 0.0915  | 0.05025 | 6.28E-07 | 0.000149 | -8.80907 |
| 128 | 0.09225 | 0.0505  | 6.31E-07 | 0.000149 | -8.80909 |
| 130 | 0.09425 | 0.0515  | 6.44E-07 | 0.000149 | -8.80918 |
| 132 | 0.09625 | 0.054   | 6.75E-07 | 0.000149 | -8.80939 |
| 134 | 0.097   | 0.054   | 6.75E-07 | 0.000149 | -8.80939 |
| 136 | 0.0985  | 0.055   | 6.88E-07 | 0.000149 | -8.80947 |
| 138 | 0.09925 | 0.06075 | 7.59E-07 | 0.000149 | -8.80995 |
| 140 | 0.09975 | 0.057   | 7.13E-07 | 0.000149 | -8.80964 |
| 142 | 0.1025  | 0.0585  | 7.31E-07 | 0.000149 | -8.80976 |
| 144 | 0.103   | 0.05975 | 7.47E-07 | 0.000149 | -8.80987 |
| 146 | 0.1035  | 0.0595  | 7.44E-07 | 0.000149 | -8.80985 |
| 148 | 0.1055  | 0.06    | 7.5E-07  | 0.000149 | -8.80989 |
| 150 | 0.10625 | 0.06125 | 7.66E-07 | 0.000149 | -8.80999 |
| 152 | 0.1075  | 0.06325 | 7.91E-07 | 0.000149 | -8.81016 |
| 154 | 0.10925 | 0.06375 | 7.97E-07 | 0.000149 | -8.8102  |
| 156 | 0.1105  | 0.0655  | 8.19E-07 | 0.000149 | -8.81035 |
| 158 | 0.1115  | 0.066   | 8.25E-07 | 0.000149 | -8.81039 |
| 160 | 0.112   | 0.06575 | 8.22E-07 | 0.000149 | -8.81037 |
| 162 | 0.11575 | 0.06975 | 8.72E-07 | 0.000149 | -8.8107  |
| 164 | 0.1155  | 0.065   | 8.13E-07 | 0.000149 | -8.81031 |
| 166 | 0.11625 | 0.0705  | 8.81E-07 | 0.000149 | -8.81077 |
| 168 | 0.119   | 0.073   | 9.13E-07 | 0.000149 | -8.81098 |
| 170 | 0.1195  | 0.0735  | 9.19E-07 | 0.000149 | -8.81102 |
| 172 | 0.12    | 0.07325 | 9.16E-07 | 0.000149 | -8.811   |
| 174 | 0.1225  | 0.076   | 9.5E-07  | 0.000149 | -8.81123 |
| 176 | 0.124   | 0.07725 | 9.66E-07 | 0.000149 | -8.81133 |
| 178 | 0.12475 | 0.0775  | 9.69E-07 | 0.000149 | -8.81135 |

|     |         |         |          |          |          |
|-----|---------|---------|----------|----------|----------|
| 180 | 0.1245  | 0.0775  | 9.69E-07 | 0.000149 | -8.81135 |
| 182 | 0.1275  | 0.07975 | 9.97E-07 | 0.000149 | -8.81154 |
| 184 | 0.1295  | 0.082   | 1.03E-06 | 0.000149 | -8.81173 |
| 186 | 0.1295  | 0.082   | 1.03E-06 | 0.000149 | -8.81173 |
| 188 | 0.13125 | 0.082   | 1.03E-06 | 0.000149 | -8.81173 |
| 190 | 0.1325  | 0.08425 | 1.05E-06 | 0.000149 | -8.81192 |
| 192 | 0.13425 | 0.086   | 1.08E-06 | 0.000149 | -8.81207 |
| 194 | 0.13675 | 0.0885  | 1.11E-06 | 0.000149 | -8.81228 |
| 196 | 0.1375  | 0.08925 | 1.12E-06 | 0.000149 | -8.81234 |
| 198 | 0.139   | 0.09075 | 1.13E-06 | 0.000149 | -8.81247 |
| 200 | 0.14025 | 0.09125 | 1.14E-06 | 0.000149 | -8.81251 |
| 202 | 0.142   | 0.09325 | 1.17E-06 | 0.000149 | -8.81268 |
| 204 | 0.143   | 0.09375 | 1.17E-06 | 0.000149 | -8.81272 |
| 206 | 0.1455  | 0.09575 | 1.2E-06  | 0.000149 | -8.81289 |
| 208 | 0.14525 | 0.096   | 1.2E-06  | 0.000149 | -8.81291 |
| 210 | 0.14675 | 0.098   | 1.23E-06 | 0.000149 | -8.81308 |
| 212 | 0.149   | 0.099   | 1.24E-06 | 0.000149 | -8.81316 |
| 214 | 0.15    | 0.0995  | 1.24E-06 | 0.000149 | -8.8132  |
| 216 | 0.15175 | 0.10075 | 1.26E-06 | 0.000149 | -8.81331 |
| 218 | 0.15325 | 0.1015  | 1.27E-06 | 0.000149 | -8.81337 |
| 220 | 0.1555  | 0.1045  | 1.31E-06 | 0.000149 | -8.81362 |
| 222 | 0.15575 | 0.105   | 1.31E-06 | 0.000149 | -8.81366 |
| 224 | 0.15775 | 0.10725 | 1.34E-06 | 0.000149 | -8.81385 |
| 226 | 0.15975 | 0.108   | 1.35E-06 | 0.000149 | -8.81392 |
| 228 | 0.16    | 0.10875 | 1.36E-06 | 0.000149 | -8.81398 |
| 230 | 0.16175 | 0.1105  | 1.38E-06 | 0.000149 | -8.81413 |
| 232 | 0.1635  | 0.1115  | 1.39E-06 | 0.000149 | -8.81421 |
| 234 | 0.16425 | 0.11175 | 1.4E-06  | 0.000149 | -8.81423 |
| 236 | 0.16775 | 0.116   | 1.45E-06 | 0.000149 | -8.81459 |
| 238 | 0.16625 | 0.114   | 1.43E-06 | 0.000149 | -8.81442 |
| 240 | 0.17    | 0.117   | 1.46E-06 | 0.000149 | -8.81467 |
| 242 | 0.17025 | 0.11725 | 1.47E-06 | 0.000149 | -8.81469 |
| 244 | 0.17125 | 0.1175  | 1.47E-06 | 0.000149 | -8.81472 |
| 246 | 0.174   | 0.121   | 1.51E-06 | 0.000148 | -8.81501 |
| 248 | 0.1755  | 0.1225  | 1.53E-06 | 0.000148 | -8.81514 |
| 250 | 0.176   | 0.12225 | 1.53E-06 | 0.000148 | -8.81512 |
| 252 | 0.17975 | 0.12525 | 1.57E-06 | 0.000148 | -8.81537 |
| 254 | 0.18    | 0.12625 | 1.58E-06 | 0.000148 | -8.81545 |
| 256 | 0.18    | 0.12475 | 1.56E-06 | 0.000148 | -8.81533 |
| 258 | 0.18125 | 0.12575 | 1.57E-06 | 0.000148 | -8.81541 |
| 260 | 0.1825  | 0.127   | 1.59E-06 | 0.000148 | -8.81551 |
| 262 | 0.1835  | 0.1265  | 1.58E-06 | 0.000148 | -8.81547 |
| 264 | 0.18675 | 0.1305  | 1.63E-06 | 0.000148 | -8.81581 |
| 266 | 0.18625 | 0.12975 | 1.62E-06 | 0.000148 | -8.81575 |
| 268 | 0.1895  | 0.13325 | 1.67E-06 | 0.000148 | -8.81604 |
| 270 | 0.19225 | 0.13575 | 1.7E-06  | 0.000148 | -8.81625 |

|     |         |         |          |          |          |
|-----|---------|---------|----------|----------|----------|
| 272 | 0.1915  | 0.134   | 1.68E-06 | 0.000148 | -8.8161  |
| 274 | 0.19375 | 0.13575 | 1.7E-06  | 0.000148 | -8.81625 |
| 276 | 0.194   | 0.13275 | 1.66E-06 | 0.000148 | -8.816   |
| 278 | 0.19575 | 0.13775 | 1.72E-06 | 0.000148 | -8.81642 |
| 280 | 0.1985  | 0.13975 | 1.75E-06 | 0.000148 | -8.81659 |
| 282 | 0.19925 | 0.1415  | 1.77E-06 | 0.000148 | -8.81674 |
| 284 | 0.20125 | 0.1415  | 1.77E-06 | 0.000148 | -8.81674 |
| 286 | 0.20225 | 0.14325 | 1.79E-06 | 0.000148 | -8.81688 |
| 288 | 0.20325 | 0.143   | 1.79E-06 | 0.000148 | -8.81686 |
| 290 | 0.205   | 0.1465  | 1.83E-06 | 0.000148 | -8.81716 |
| 292 | 0.2065  | 0.1465  | 1.83E-06 | 0.000148 | -8.81716 |
| 294 | 0.208   | 0.14475 | 1.81E-06 | 0.000148 | -8.81701 |
| 296 | 0.209   | 0.148   | 1.85E-06 | 0.000148 | -8.81729 |
| 298 | 0.212   | 0.15075 | 1.88E-06 | 0.000148 | -8.81752 |

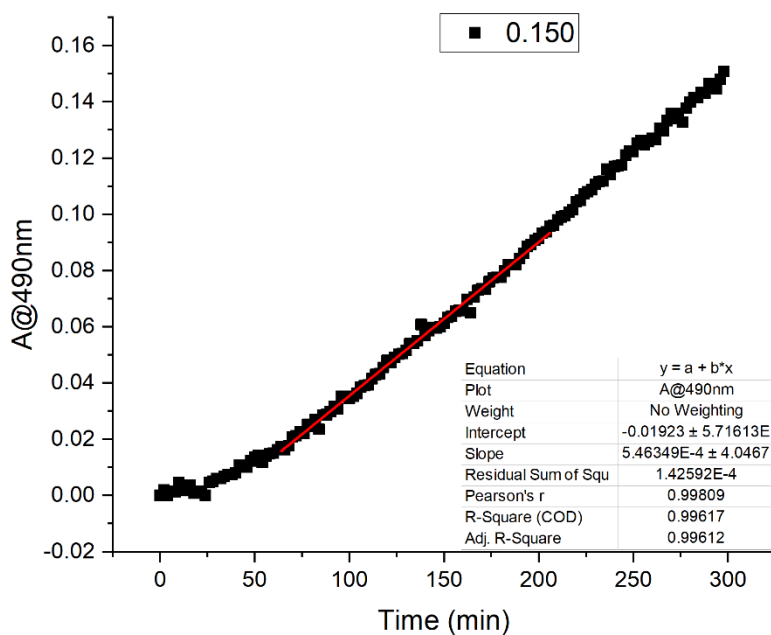

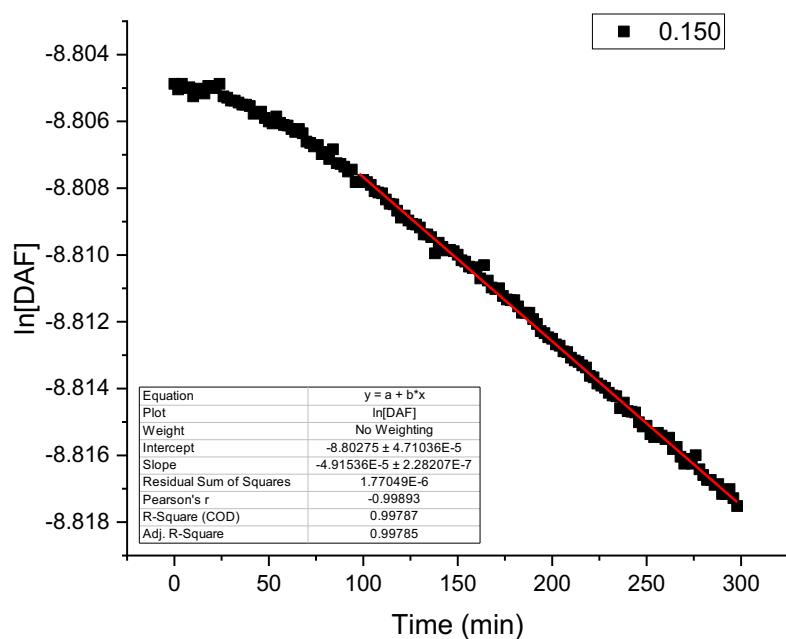

#### 0.175 mM DAF

| Time (min) | A@490nm minus BK | set to 0  | [FLU] (M) | [DAF] (M) | ln[DAF]  |
|------------|------------------|-----------|-----------|-----------|----------|
| 0          | 0.05325          | 0         | 0         | 0.000175  | -8.65072 |
| 2          | 0.04725          | -0.002    | -2.5E-08  | 0.000175  | -8.65058 |
| 4          | 0.047            | -0.00275  | -3.4E-08  | 0.000175  | -8.65053 |
| 6          | 0.0485           | -0.00175  | -2.2E-08  | 0.000175  | -8.6506  |
| 8          | 0.0475           | -0.00125  | -1.6E-08  | 0.000175  | -8.65064 |
| 10         | 0.049            | -0.001    | -1.3E-08  | 0.000175  | -8.65065 |
| 12         | 0.0475           | -0.0015   | -1.9E-08  | 0.000175  | -8.65062 |
| 14         | 0.0475           | -0.0035   | -4.4E-08  | 0.000175  | -8.65047 |
| 16         | 0.04725          | -0.00275  | -3.4E-08  | 0.000175  | -8.65053 |
| 18         | 0.047            | -0.00275  | -3.4E-08  | 0.000175  | -8.65053 |
| 20         | 0.0475           | -0.00375  | -4.7E-08  | 0.000175  | -8.65046 |
| 22         | 0.04625          | -0.00325  | -4.1E-08  | 0.000175  | -8.65049 |
| 24         | 0.0475           | -0.0025   | -3.1E-08  | 0.000175  | -8.65055 |
| 26         | 0.048            | -0.00475  | -5.9E-08  | 0.000175  | -8.65039 |
| 28         | 0.049            | -0.00325  | -4.1E-08  | 0.000175  | -8.65049 |
| 30         | 0.05             | -5.00E-04 | -6.3E-09  | 0.000175  | -8.65069 |
| 32         | 0.04875          | -0.003    | -3.8E-08  | 0.000175  | -8.65051 |
| 34         | 0.05             | -0.00125  | -1.6E-08  | 0.000175  | -8.65064 |
| 36         | 0.05075          | -5.00E-04 | -6.3E-09  | 0.000175  | -8.65069 |
| 38         | 0.0515           | 2.50E-04  | 3.13E-09  | 0.000175  | -8.65074 |
| 40         | 0.0515           | 2.50E-04  | 3.13E-09  | 0.000175  | -8.65074 |
| 42         | 0.05275          | 0.00125   | 1.56E-08  | 0.000175  | -8.65081 |
| 44         | 0.05275          | 0.001     | 1.25E-08  | 0.000175  | -8.6508  |
| 46         | 0.053            | 0.00125   | 1.56E-08  | 0.000175  | -8.65081 |
| 48         | 0.05525          | 0.0045    | 5.63E-08  | 0.000175  | -8.65105 |

|     |         |         |          |          |          |
|-----|---------|---------|----------|----------|----------|
| 50  | 0.05625 | 0.00475 | 5.94E-08 | 0.000175 | -8.65106 |
| 52  | 0.05675 | 0.00625 | 7.81E-08 | 0.000175 | -8.65117 |
| 54  | 0.05725 | 0.005   | 6.25E-08 | 0.000175 | -8.65108 |
| 56  | 0.05975 | 0.00775 | 9.69E-08 | 0.000175 | -8.65128 |
| 58  | 0.059   | 0.007   | 8.75E-08 | 0.000175 | -8.65122 |
| 60  | 0.06    | 0.008   | 1E-07    | 0.000175 | -8.6513  |
| 62  | 0.06225 | 0.00975 | 1.22E-07 | 0.000175 | -8.65142 |
| 64  | 0.06325 | 0.01025 | 1.28E-07 | 0.000175 | -8.65146 |
| 66  | 0.064   | 0.012   | 1.5E-07  | 0.000175 | -8.65158 |
| 68  | 0.06425 | 0.01225 | 1.53E-07 | 0.000175 | -8.6516  |
| 70  | 0.065   | 0.013   | 1.63E-07 | 0.000175 | -8.65165 |
| 72  | 0.06675 | 0.01475 | 1.84E-07 | 0.000175 | -8.65178 |
| 74  | 0.06825 | 0.0165  | 2.06E-07 | 0.000175 | -8.6519  |
| 76  | 0.07025 | 0.019   | 2.38E-07 | 0.000175 | -8.65208 |
| 78  | 0.07025 | 0.0165  | 2.06E-07 | 0.000175 | -8.6519  |
| 80  | 0.072   | 0.01825 | 2.28E-07 | 0.000175 | -8.65203 |
| 82  | 0.07225 | 0.01975 | 2.47E-07 | 0.000175 | -8.65214 |
| 84  | 0.07075 | 0.01675 | 2.09E-07 | 0.000175 | -8.65192 |
| 86  | 0.07575 | 0.022   | 2.75E-07 | 0.000175 | -8.6523  |
| 88  | 0.07625 | 0.023   | 2.88E-07 | 0.000175 | -8.65237 |
| 90  | 0.0765  | 0.02425 | 3.03E-07 | 0.000175 | -8.65246 |
| 92  | 0.0775  | 0.02375 | 2.97E-07 | 0.000175 | -8.65242 |
| 94  | 0.0785  | 0.025   | 3.13E-07 | 0.000175 | -8.65251 |
| 96  | 0.08025 | 0.02725 | 3.41E-07 | 0.000175 | -8.65267 |
| 98  | 0.08175 | 0.028   | 3.5E-07  | 0.000175 | -8.65273 |
| 100 | 0.08225 | 0.02775 | 3.47E-07 | 0.000175 | -8.65271 |
| 102 | 0.082   | 0.027   | 3.38E-07 | 0.000175 | -8.65266 |
| 104 | 0.0845  | 0.02975 | 3.72E-07 | 0.000175 | -8.65285 |
| 106 | 0.08475 | 0.0305  | 3.81E-07 | 0.000175 | -8.65291 |
| 108 | 0.08775 | 0.03325 | 4.16E-07 | 0.000175 | -8.6531  |
| 110 | 0.0875  | 0.03225 | 4.03E-07 | 0.000175 | -8.65303 |
| 112 | 0.0885  | 0.0345  | 4.31E-07 | 0.000175 | -8.65319 |
| 114 | 0.09025 | 0.036   | 4.5E-07  | 0.000175 | -8.6533  |
| 116 | 0.09225 | 0.0365  | 4.56E-07 | 0.000175 | -8.65334 |
| 118 | 0.09275 | 0.03725 | 4.66E-07 | 0.000175 | -8.65339 |
| 120 | 0.0945  | 0.039   | 4.88E-07 | 0.000175 | -8.65351 |
| 122 | 0.09675 | 0.04075 | 5.09E-07 | 0.000174 | -8.65364 |
| 124 | 0.0975  | 0.0425  | 5.31E-07 | 0.000174 | -8.65376 |
| 126 | 0.09975 | 0.04375 | 5.47E-07 | 0.000174 | -8.65385 |
| 128 | 0.1     | 0.04475 | 5.59E-07 | 0.000174 | -8.65393 |
| 130 | 0.10225 | 0.04525 | 5.66E-07 | 0.000174 | -8.65396 |
| 132 | 0.104   | 0.04775 | 5.97E-07 | 0.000174 | -8.65414 |
| 134 | 0.10375 | 0.0475  | 5.94E-07 | 0.000174 | -8.65412 |
| 136 | 0.10525 | 0.04925 | 6.16E-07 | 0.000174 | -8.65425 |
| 138 | 0.107   | 0.056   | 7E-07    | 0.000174 | -8.65473 |
| 140 | 0.10725 | 0.05025 | 6.28E-07 | 0.000174 | -8.65432 |

|     |         |         |          |          |          |
|-----|---------|---------|----------|----------|----------|
| 142 | 0.1105  | 0.05425 | 6.78E-07 | 0.000174 | -8.65461 |
| 144 | 0.11    | 0.05375 | 6.72E-07 | 0.000174 | -8.65457 |
| 146 | 0.11075 | 0.05325 | 6.66E-07 | 0.000174 | -8.65454 |
| 148 | 0.11375 | 0.0555  | 6.94E-07 | 0.000174 | -8.6547  |
| 150 | 0.114   | 0.0555  | 6.94E-07 | 0.000174 | -8.6547  |
| 152 | 0.11475 | 0.05725 | 7.16E-07 | 0.000174 | -8.65482 |
| 154 | 0.118   | 0.05975 | 7.47E-07 | 0.000174 | -8.655   |
| 156 | 0.11825 | 0.05975 | 7.47E-07 | 0.000174 | -8.655   |
| 158 | 0.1195  | 0.06025 | 7.53E-07 | 0.000174 | -8.65504 |
| 160 | 0.12125 | 0.063   | 7.88E-07 | 0.000174 | -8.65523 |
| 162 | 0.12225 | 0.0635  | 7.94E-07 | 0.000174 | -8.65527 |
| 164 | 0.12375 | 0.065   | 8.13E-07 | 0.000174 | -8.65538 |
| 166 | 0.12375 | 0.06525 | 8.16E-07 | 0.000174 | -8.6554  |
| 168 | 0.1265  | 0.06775 | 8.47E-07 | 0.000174 | -8.65558 |
| 170 | 0.12725 | 0.0675  | 8.44E-07 | 0.000174 | -8.65556 |
| 172 | 0.128   | 0.069   | 8.63E-07 | 0.000174 | -8.65567 |
| 174 | 0.1305  | 0.07325 | 9.16E-07 | 0.000174 | -8.65597 |
| 176 | 0.1325  | 0.074   | 9.25E-07 | 0.000174 | -8.65602 |
| 178 | 0.13275 | 0.074   | 9.25E-07 | 0.000174 | -8.65602 |
| 180 | 0.13375 | 0.0745  | 9.31E-07 | 0.000174 | -8.65606 |
| 182 | 0.1355  | 0.07625 | 9.53E-07 | 0.000174 | -8.65619 |
| 184 | 0.1365  | 0.07675 | 9.59E-07 | 0.000174 | -8.65622 |
| 186 | 0.13825 | 0.078   | 9.75E-07 | 0.000174 | -8.65631 |
| 188 | 0.13925 | 0.079   | 9.88E-07 | 0.000174 | -8.65638 |
| 190 | 0.14    | 0.07925 | 9.91E-07 | 0.000174 | -8.6564  |
| 192 | 0.1425  | 0.08225 | 1.03E-06 | 0.000174 | -8.65662 |
| 194 | 0.14375 | 0.08325 | 1.04E-06 | 0.000174 | -8.65669 |
| 196 | 0.14475 | 0.08475 | 1.06E-06 | 0.000174 | -8.6568  |
| 198 | 0.14675 | 0.08725 | 1.09E-06 | 0.000174 | -8.65698 |
| 200 | 0.1475  | 0.08725 | 1.09E-06 | 0.000174 | -8.65698 |
| 202 | 0.149   | 0.08875 | 1.11E-06 | 0.000174 | -8.65708 |
| 204 | 0.15075 | 0.09025 | 1.13E-06 | 0.000174 | -8.65719 |
| 206 | 0.15275 | 0.0915  | 1.14E-06 | 0.000174 | -8.65728 |
| 208 | 0.15275 | 0.0915  | 1.14E-06 | 0.000174 | -8.65728 |
| 210 | 0.15375 | 0.09275 | 1.16E-06 | 0.000174 | -8.65737 |
| 212 | 0.1555  | 0.09375 | 1.17E-06 | 0.000174 | -8.65744 |
| 214 | 0.158   | 0.0965  | 1.21E-06 | 0.000174 | -8.65764 |
| 216 | 0.158   | 0.09625 | 1.2E-06  | 0.000174 | -8.65762 |
| 218 | 0.15975 | 0.0965  | 1.21E-06 | 0.000174 | -8.65764 |
| 220 | 0.162   | 0.09925 | 1.24E-06 | 0.000174 | -8.65784 |
| 222 | 0.16325 | 0.101   | 1.26E-06 | 0.000174 | -8.65797 |
| 224 | 0.16525 | 0.1025  | 1.28E-06 | 0.000174 | -8.65807 |
| 226 | 0.167   | 0.10475 | 1.31E-06 | 0.000174 | -8.65823 |
| 228 | 0.167   | 0.10425 | 1.3E-06  | 0.000174 | -8.6582  |
| 230 | 0.16925 | 0.10675 | 1.33E-06 | 0.000174 | -8.65838 |
| 232 | 0.17    | 0.1065  | 1.33E-06 | 0.000174 | -8.65836 |

|     |         |         |          |          |          |
|-----|---------|---------|----------|----------|----------|
| 234 | 0.173   | 0.1095  | 1.37E-06 | 0.000174 | -8.65858 |
| 236 | 0.17275 | 0.111   | 1.39E-06 | 0.000174 | -8.65868 |
| 238 | 0.17375 | 0.1105  | 1.38E-06 | 0.000174 | -8.65865 |
| 240 | 0.1755  | 0.11175 | 1.4E-06  | 0.000174 | -8.65874 |
| 242 | 0.178   | 0.114   | 1.43E-06 | 0.000174 | -8.6589  |
| 244 | 0.17875 | 0.11375 | 1.42E-06 | 0.000174 | -8.65888 |
| 246 | 0.18025 | 0.117   | 1.46E-06 | 0.000174 | -8.65912 |
| 248 | 0.18375 | 0.1205  | 1.51E-06 | 0.000173 | -8.65937 |
| 250 | 0.18375 | 0.12025 | 1.5E-06  | 0.000173 | -8.65935 |
| 252 | 0.18625 | 0.1225  | 1.53E-06 | 0.000173 | -8.65951 |
| 254 | 0.18725 | 0.1235  | 1.54E-06 | 0.000173 | -8.65959 |
| 256 | 0.1885  | 0.12325 | 1.54E-06 | 0.000173 | -8.65957 |
| 258 | 0.1895  | 0.12475 | 1.56E-06 | 0.000173 | -8.65968 |
| 260 | 0.19125 | 0.12575 | 1.57E-06 | 0.000173 | -8.65975 |
| 262 | 0.1925  | 0.12725 | 1.59E-06 | 0.000173 | -8.65986 |
| 264 | 0.1955  | 0.1295  | 1.62E-06 | 0.000173 | -8.66002 |
| 266 | 0.1945  | 0.13    | 1.63E-06 | 0.000173 | -8.66005 |
| 268 | 0.19675 | 0.131   | 1.64E-06 | 0.000173 | -8.66013 |
| 270 | 0.2005  | 0.1355  | 1.69E-06 | 0.000173 | -8.66045 |
| 272 | 0.20125 | 0.13425 | 1.68E-06 | 0.000173 | -8.66036 |
| 274 | 0.2025  | 0.1365  | 1.71E-06 | 0.000173 | -8.66052 |
| 276 | 0.20225 | 0.13575 | 1.7E-06  | 0.000173 | -8.66047 |
| 278 | 0.205   | 0.13775 | 1.72E-06 | 0.000173 | -8.66061 |
| 280 | 0.20675 | 0.14025 | 1.75E-06 | 0.000173 | -8.66079 |
| 282 | 0.21025 | 0.14325 | 1.79E-06 | 0.000173 | -8.66101 |
| 284 | 0.21    | 0.14275 | 1.78E-06 | 0.000173 | -8.66097 |
| 286 | 0.21125 | 0.14375 | 1.8E-06  | 0.000173 | -8.66105 |
| 288 | 0.21325 | 0.14525 | 1.82E-06 | 0.000173 | -8.66115 |
| 290 | 0.2145  | 0.1475  | 1.84E-06 | 0.000173 | -8.66132 |
| 292 | 0.21625 | 0.149   | 1.86E-06 | 0.000173 | -8.66142 |
| 294 | 0.218   | 0.15025 | 1.88E-06 | 0.000173 | -8.66151 |
| 296 | 0.21775 | 0.1505  | 1.88E-06 | 0.000173 | -8.66153 |
| 298 | 0.22075 | 0.15175 | 1.9E-06  | 0.000173 | -8.66162 |



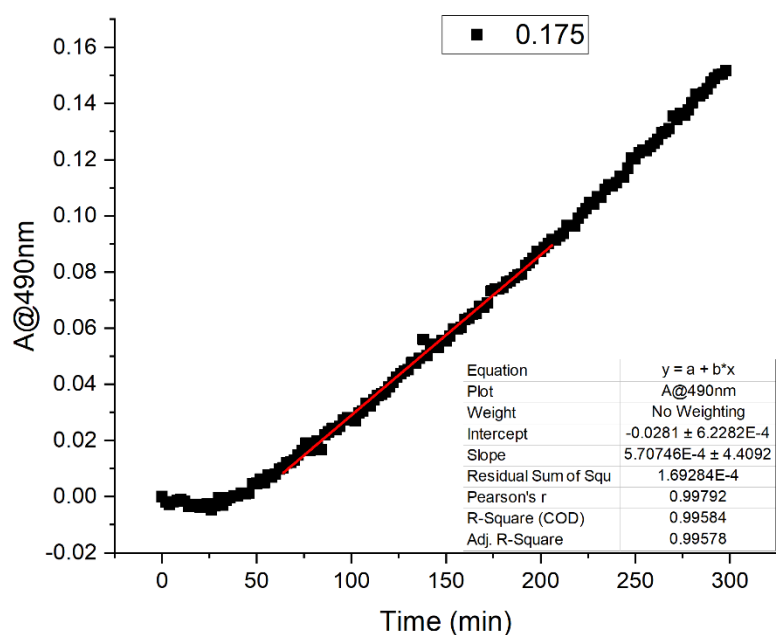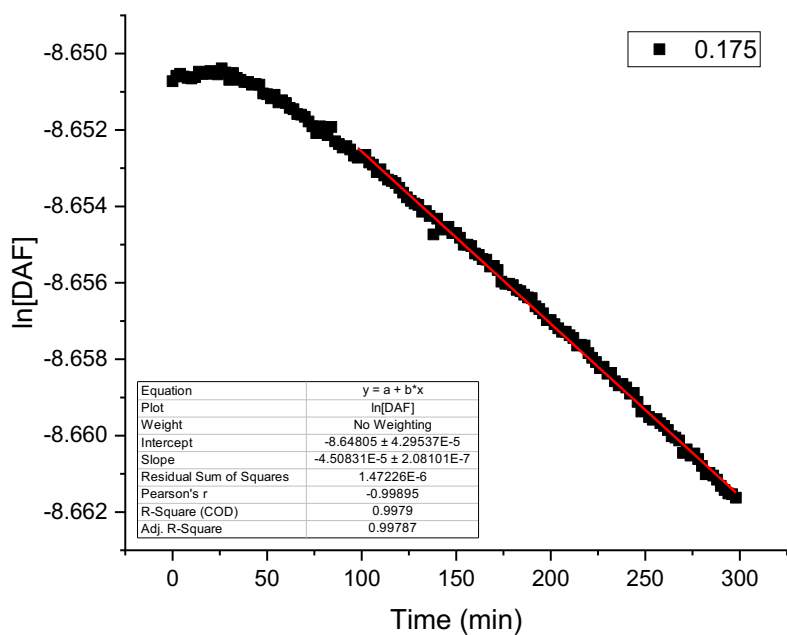

**0.200 mM DAF**

| Time (min) | A@490nm minus BK | set to 0 | [FLU] (M) | [DAF] (M) | ln[DAF]  |
|------------|------------------|----------|-----------|-----------|----------|
| 0          | 0.04825          | 0        | 0         | 0.0002    | -8.51719 |
| 2          | 0.0475           | 5.00E-04 | 6.25E-09  | 0.0002    | -8.51722 |
| 4          | 0.04775          | -0.00125 | -1.6E-08  | 0.0002    | -8.51712 |
| 6          | 0.04875          | 0.0025   | 3.13E-08  | 0.0002    | -8.51735 |
| 8          | 0.05025          | 0.005    | 6.25E-08  | 0.0002    | -8.51751 |
| 10         | 0.05075          | 0.005    | 6.25E-08  | 0.0002    | -8.51751 |

|     |         |         |          |        |          |
|-----|---------|---------|----------|--------|----------|
| 12  | 0.05125 | 0.00475 | 5.94E-08 | 0.0002 | -8.51749 |
| 14  | 0.04925 | 0.00375 | 4.69E-08 | 0.0002 | -8.51743 |
| 16  | 0.05075 | 0.00475 | 5.94E-08 | 0.0002 | -8.51749 |
| 18  | 0.049   | 0.00325 | 4.06E-08 | 0.0002 | -8.5174  |
| 20  | 0.05    | 0.00375 | 4.69E-08 | 0.0002 | -8.51743 |
| 22  | 0.05    | 0.00425 | 5.31E-08 | 0.0002 | -8.51746 |
| 24  | 0.05025 | 0.0045  | 5.63E-08 | 0.0002 | -8.51747 |
| 26  | 0.0515  | 0.006   | 7.5E-08  | 0.0002 | -8.51757 |
| 28  | 0.053   | 0.00525 | 6.56E-08 | 0.0002 | -8.51752 |
| 30  | 0.05375 | 0.00875 | 1.09E-07 | 0.0002 | -8.51774 |
| 32  | 0.05275 | 0.007   | 8.75E-08 | 0.0002 | -8.51763 |
| 34  | 0.05425 | 0.0085  | 1.06E-07 | 0.0002 | -8.51772 |
| 36  | 0.0545  | 0.0075  | 9.38E-08 | 0.0002 | -8.51766 |
| 38  | 0.0545  | 0.0075  | 9.38E-08 | 0.0002 | -8.51766 |
| 40  | 0.05525 | 0.0085  | 1.06E-07 | 0.0002 | -8.51772 |
| 42  | 0.056   | 0.00875 | 1.09E-07 | 0.0002 | -8.51774 |
| 44  | 0.057   | 0.00725 | 9.06E-08 | 0.0002 | -8.51765 |
| 46  | 0.0575  | 0.01025 | 1.28E-07 | 0.0002 | -8.51783 |
| 48  | 0.058   | 0.0105  | 1.31E-07 | 0.0002 | -8.51785 |
| 50  | 0.06125 | 0.01175 | 1.47E-07 | 0.0002 | -8.51793 |
| 52  | 0.0605  | 0.0145  | 1.81E-07 | 0.0002 | -8.5181  |
| 54  | 0.062   | 0.0145  | 1.81E-07 | 0.0002 | -8.5181  |
| 56  | 0.063   | 0.015   | 1.88E-07 | 0.0002 | -8.51813 |
| 58  | 0.063   | 0.01425 | 1.78E-07 | 0.0002 | -8.51808 |
| 60  | 0.0645  | 0.01575 | 1.97E-07 | 0.0002 | -8.51818 |
| 62  | 0.06625 | 0.017   | 2.13E-07 | 0.0002 | -8.51826 |
| 64  | 0.06725 | 0.01825 | 2.28E-07 | 0.0002 | -8.51833 |
| 66  | 0.06775 | 0.01975 | 2.47E-07 | 0.0002 | -8.51843 |
| 68  | 0.0685  | 0.019   | 2.38E-07 | 0.0002 | -8.51838 |
| 70  | 0.06925 | 0.02    | 2.5E-07  | 0.0002 | -8.51844 |
| 72  | 0.07125 | 0.02225 | 2.78E-07 | 0.0002 | -8.51858 |
| 74  | 0.072   | 0.02325 | 2.91E-07 | 0.0002 | -8.51865 |
| 76  | 0.073   | 0.024   | 3E-07    | 0.0002 | -8.51869 |
| 78  | 0.07425 | 0.0245  | 3.06E-07 | 0.0002 | -8.51873 |
| 80  | 0.075   | 0.02575 | 3.22E-07 | 0.0002 | -8.5188  |
| 82  | 0.07625 | 0.028   | 3.5E-07  | 0.0002 | -8.51894 |
| 84  | 0.0755  | 0.025   | 3.13E-07 | 0.0002 | -8.51876 |
| 86  | 0.07825 | 0.0255  | 3.19E-07 | 0.0002 | -8.51879 |
| 88  | 0.07975 | 0.03    | 3.75E-07 | 0.0002 | -8.51907 |
| 90  | 0.0815  | 0.032   | 4E-07    | 0.0002 | -8.5192  |
| 92  | 0.0815  | 0.0315  | 3.94E-07 | 0.0002 | -8.51916 |
| 94  | 0.083   | 0.033   | 4.13E-07 | 0.0002 | -8.51926 |
| 96  | 0.084   | 0.0335  | 4.19E-07 | 0.0002 | -8.51929 |
| 98  | 0.086   | 0.03475 | 4.34E-07 | 0.0002 | -8.51937 |
| 100 | 0.0855  | 0.035   | 4.38E-07 | 0.0002 | -8.51938 |
| 102 | 0.0865  | 0.03575 | 4.47E-07 | 0.0002 | -8.51943 |

|     |         |         |          |          |          |
|-----|---------|---------|----------|----------|----------|
| 104 | 0.09    | 0.03775 | 4.72E-07 | 0.0002   | -8.51956 |
| 106 | 0.089   | 0.039   | 4.88E-07 | 0.0002   | -8.51963 |
| 108 | 0.0915  | 0.0405  | 5.06E-07 | 0.000199 | -8.51973 |
| 110 | 0.09175 | 0.04025 | 5.03E-07 | 0.000199 | -8.51971 |
| 112 | 0.0925  | 0.042   | 5.25E-07 | 0.000199 | -8.51982 |
| 114 | 0.09525 | 0.04375 | 5.47E-07 | 0.000199 | -8.51993 |
| 116 | 0.09525 | 0.0445  | 5.56E-07 | 0.000199 | -8.51998 |
| 118 | 0.09675 | 0.046   | 5.75E-07 | 0.000199 | -8.52007 |
| 120 | 0.0985  | 0.04725 | 5.91E-07 | 0.000199 | -8.52015 |
| 122 | 0.10025 | 0.047   | 5.88E-07 | 0.000199 | -8.52014 |
| 124 | 0.10075 | 0.049   | 6.13E-07 | 0.000199 | -8.52026 |
| 126 | 0.103   | 0.05025 | 6.28E-07 | 0.000199 | -8.52034 |
| 128 | 0.1035  | 0.05125 | 6.41E-07 | 0.000199 | -8.5204  |
| 130 | 0.10525 | 0.052   | 6.5E-07  | 0.000199 | -8.52045 |
| 132 | 0.10575 | 0.05325 | 6.66E-07 | 0.000199 | -8.52053 |
| 134 | 0.10775 | 0.055   | 6.88E-07 | 0.000199 | -8.52064 |
| 136 | 0.10875 | 0.05625 | 7.03E-07 | 0.000199 | -8.52072 |
| 138 | 0.11025 | 0.061   | 7.63E-07 | 0.000199 | -8.52101 |
| 140 | 0.1105  | 0.0575  | 7.19E-07 | 0.000199 | -8.52079 |
| 142 | 0.11225 | 0.0585  | 7.31E-07 | 0.000199 | -8.52086 |
| 144 | 0.11425 | 0.06075 | 7.59E-07 | 0.000199 | -8.521   |
| 146 | 0.11525 | 0.06075 | 7.59E-07 | 0.000199 | -8.521   |
| 148 | 0.11675 | 0.062   | 7.75E-07 | 0.000199 | -8.52108 |
| 150 | 0.11875 | 0.064   | 8E-07    | 0.000199 | -8.5212  |
| 152 | 0.11875 | 0.06425 | 8.03E-07 | 0.000199 | -8.52122 |
| 154 | 0.12025 | 0.06525 | 8.16E-07 | 0.000199 | -8.52128 |
| 156 | 0.12175 | 0.06625 | 8.28E-07 | 0.000199 | -8.52134 |
| 158 | 0.1235  | 0.0675  | 8.44E-07 | 0.000199 | -8.52142 |
| 160 | 0.124   | 0.0685  | 8.56E-07 | 0.000199 | -8.52148 |
| 162 | 0.1255  | 0.07    | 8.75E-07 | 0.000199 | -8.52158 |
| 164 | 0.12675 | 0.07075 | 8.84E-07 | 0.000199 | -8.52162 |
| 166 | 0.1285  | 0.07325 | 9.16E-07 | 0.000199 | -8.52178 |
| 168 | 0.13    | 0.074   | 9.25E-07 | 0.000199 | -8.52183 |
| 170 | 0.13225 | 0.076   | 9.5E-07  | 0.000199 | -8.52195 |
| 172 | 0.13225 | 0.0765  | 9.56E-07 | 0.000199 | -8.52199 |
| 174 | 0.13425 | 0.0775  | 9.69E-07 | 0.000199 | -8.52205 |
| 176 | 0.13525 | 0.078   | 9.75E-07 | 0.000199 | -8.52208 |
| 178 | 0.13775 | 0.0815  | 1.02E-06 | 0.000199 | -8.5223  |
| 180 | 0.13675 | 0.0795  | 9.94E-07 | 0.000199 | -8.52217 |
| 182 | 0.1395  | 0.0815  | 1.02E-06 | 0.000199 | -8.5223  |
| 184 | 0.14125 | 0.083   | 1.04E-06 | 0.000199 | -8.52239 |
| 186 | 0.143   | 0.08475 | 1.06E-06 | 0.000199 | -8.5225  |
| 188 | 0.14325 | 0.084   | 1.05E-06 | 0.000199 | -8.52246 |
| 190 | 0.14525 | 0.087   | 1.09E-06 | 0.000199 | -8.52265 |
| 192 | 0.14725 | 0.089   | 1.11E-06 | 0.000199 | -8.52277 |
| 194 | 0.148   | 0.08875 | 1.11E-06 | 0.000199 | -8.52276 |

|     |         |         |          |          |          |
|-----|---------|---------|----------|----------|----------|
| 196 | 0.1495  | 0.0905  | 1.13E-06 | 0.000199 | -8.52287 |
| 198 | 0.151   | 0.092   | 1.15E-06 | 0.000199 | -8.52296 |
| 200 | 0.15275 | 0.0935  | 1.17E-06 | 0.000199 | -8.52305 |
| 202 | 0.15375 | 0.09425 | 1.18E-06 | 0.000199 | -8.5231  |
| 204 | 0.156   | 0.0965  | 1.21E-06 | 0.000199 | -8.52324 |
| 206 | 0.15775 | 0.0975  | 1.22E-06 | 0.000199 | -8.52331 |
| 208 | 0.15825 | 0.098   | 1.23E-06 | 0.000199 | -8.52334 |
| 210 | 0.15975 | 0.09975 | 1.25E-06 | 0.000199 | -8.52345 |
| 212 | 0.16125 | 0.1005  | 1.26E-06 | 0.000199 | -8.52349 |
| 214 | 0.16325 | 0.103   | 1.29E-06 | 0.000199 | -8.52365 |
| 216 | 0.16425 | 0.10225 | 1.28E-06 | 0.000199 | -8.5236  |
| 218 | 0.16625 | 0.105   | 1.31E-06 | 0.000199 | -8.52378 |
| 220 | 0.1675  | 0.1055  | 1.32E-06 | 0.000199 | -8.52381 |
| 222 | 0.16825 | 0.10625 | 1.33E-06 | 0.000199 | -8.52386 |
| 224 | 0.1695  | 0.1085  | 1.36E-06 | 0.000199 | -8.524   |
| 226 | 0.17275 | 0.11125 | 1.39E-06 | 0.000199 | -8.52417 |
| 228 | 0.1735  | 0.111   | 1.39E-06 | 0.000199 | -8.52415 |
| 230 | 0.174   | 0.11225 | 1.4E-06  | 0.000199 | -8.52423 |
| 232 | 0.17625 | 0.113   | 1.41E-06 | 0.000199 | -8.52428 |
| 234 | 0.176   | 0.112   | 1.4E-06  | 0.000199 | -8.52422 |
| 236 | 0.179   | 0.1165  | 1.46E-06 | 0.000199 | -8.5245  |
| 238 | 0.18    | 0.11625 | 1.45E-06 | 0.000199 | -8.52449 |
| 240 | 0.18075 | 0.11625 | 1.45E-06 | 0.000199 | -8.52449 |
| 242 | 0.1825  | 0.118   | 1.48E-06 | 0.000199 | -8.5246  |
| 244 | 0.1845  | 0.12025 | 1.5E-06  | 0.000198 | -8.52474 |
| 246 | 0.18675 | 0.12225 | 1.53E-06 | 0.000198 | -8.52486 |
| 248 | 0.188   | 0.123   | 1.54E-06 | 0.000198 | -8.52491 |
| 250 | 0.1885  | 0.12225 | 1.53E-06 | 0.000198 | -8.52486 |
| 252 | 0.1905  | 0.125   | 1.56E-06 | 0.000198 | -8.52504 |
| 254 | 0.19225 | 0.1265  | 1.58E-06 | 0.000198 | -8.52513 |
| 256 | 0.1945  | 0.12725 | 1.59E-06 | 0.000198 | -8.52518 |
| 258 | 0.195   | 0.12775 | 1.6E-06  | 0.000198 | -8.52521 |
| 260 | 0.19575 | 0.1285  | 1.61E-06 | 0.000198 | -8.52526 |
| 262 | 0.19775 | 0.1305  | 1.63E-06 | 0.000198 | -8.52538 |
| 264 | 0.2005  | 0.133   | 1.66E-06 | 0.000198 | -8.52554 |
| 266 | 0.2005  | 0.13275 | 1.66E-06 | 0.000198 | -8.52552 |
| 268 | 0.203   | 0.13425 | 1.68E-06 | 0.000198 | -8.52562 |
| 270 | 0.2045  | 0.1365  | 1.71E-06 | 0.000198 | -8.52576 |
| 272 | 0.206   | 0.13625 | 1.7E-06  | 0.000198 | -8.52575 |
| 274 | 0.2075  | 0.13825 | 1.73E-06 | 0.000198 | -8.52587 |
| 276 | 0.20825 | 0.139   | 1.74E-06 | 0.000198 | -8.52592 |
| 278 | 0.2105  | 0.14    | 1.75E-06 | 0.000198 | -8.52598 |
| 280 | 0.21325 | 0.14125 | 1.77E-06 | 0.000198 | -8.52606 |
| 282 | 0.21475 | 0.14525 | 1.82E-06 | 0.000198 | -8.52631 |
| 284 | 0.215   | 0.14425 | 1.8E-06  | 0.000198 | -8.52625 |
| 286 | 0.217   | 0.146   | 1.83E-06 | 0.000198 | -8.52636 |

|     |        |         |          |          |          |
|-----|--------|---------|----------|----------|----------|
| 288 | 0.2185 | 0.14725 | 1.84E-06 | 0.000198 | -8.52644 |
| 290 | 0.22   | 0.14925 | 1.87E-06 | 0.000198 | -8.52657 |
| 292 | 0.2205 | 0.1495  | 1.87E-06 | 0.000198 | -8.52658 |
| 294 | 0.222  | 0.1505  | 1.88E-06 | 0.000198 | -8.52664 |
| 296 | 0.224  | 0.15225 | 1.9E-06  | 0.000198 | -8.52675 |
| 298 | 0.2265 | 0.15375 | 1.92E-06 | 0.000198 | -8.52685 |

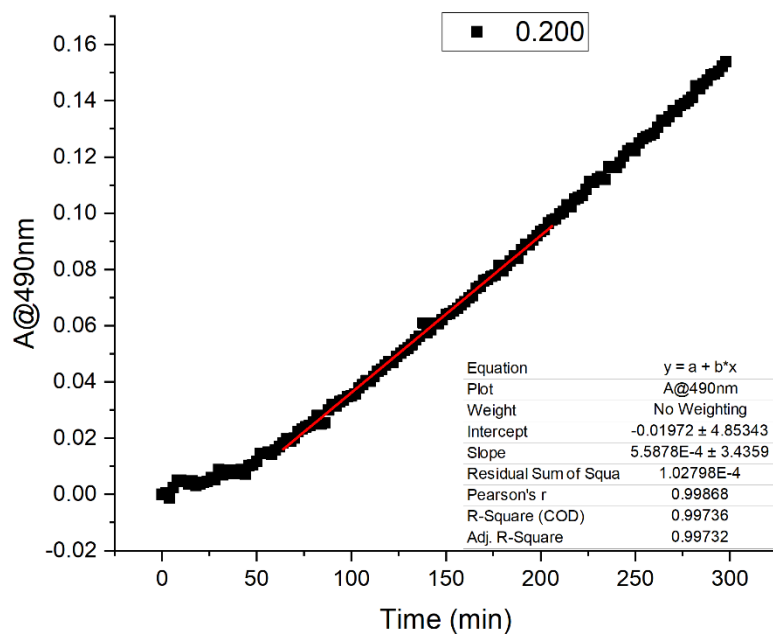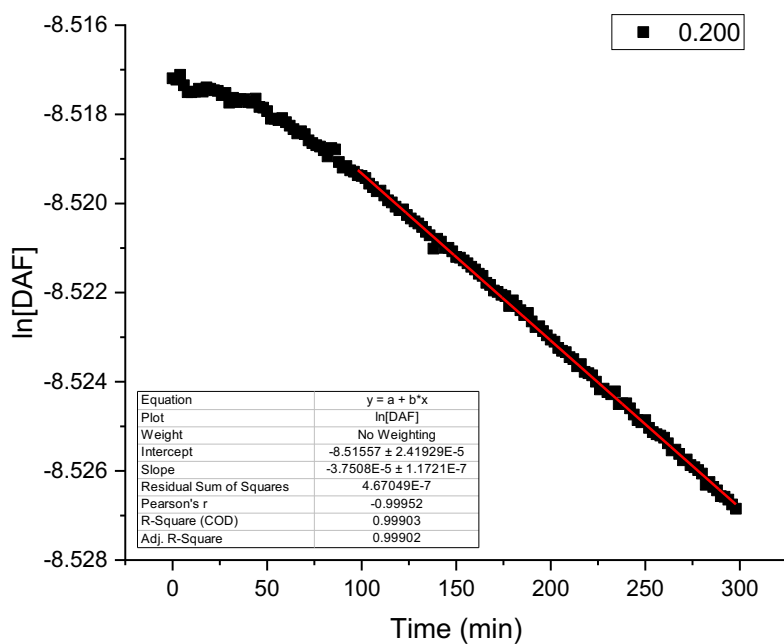

## 0.225 mM DAF

| Time (min) | A@490nm minus BK | set to 0 | [FLU] (M) | [DAF] (M) | ln[DAF]  |
|------------|------------------|----------|-----------|-----------|----------|
| 0          | 0.05075          | 0        | 0         | 0.000225  | -8.39941 |
| 2          | 0.05075          | 0.008    | 1E-07     | 0.000225  | -8.39985 |
| 4          | 0.05175          | 0.01525  | 1.91E-07  | 0.000225  | -8.40026 |
| 6          | 0.052            | 0.015    | 1.88E-07  | 0.000225  | -8.40024 |
| 8          | 0.0535           | 0.017    | 2.13E-07  | 0.000225  | -8.40036 |
| 10         | 0.052            | 0.0135   | 1.69E-07  | 0.000225  | -8.40016 |
| 12         | 0.054            | 0.01825  | 2.28E-07  | 0.000225  | -8.40042 |
| 14         | 0.0545           | 0.01925  | 2.41E-07  | 0.000225  | -8.40048 |
| 16         | 0.055            | 0.0205   | 2.56E-07  | 0.000225  | -8.40055 |
| 18         | 0.05525          | 0.0195   | 2.44E-07  | 0.000225  | -8.40049 |
| 20         | 0.05625          | 0.02025  | 2.53E-07  | 0.000225  | -8.40054 |
| 22         | 0.05625          | 0.0195   | 2.44E-07  | 0.000225  | -8.40049 |
| 24         | 0.0565           | 0.0215   | 2.69E-07  | 0.000225  | -8.40061 |
| 26         | 0.057            | 0.0215   | 2.69E-07  | 0.000225  | -8.40061 |
| 28         | 0.05725          | 0.02075  | 2.59E-07  | 0.000225  | -8.40056 |
| 30         | 0.058            | 0.02075  | 2.59E-07  | 0.000225  | -8.40056 |
| 32         | 0.05825          | 0.02275  | 2.84E-07  | 0.000225  | -8.40067 |
| 34         | 0.059            | 0.0235   | 2.94E-07  | 0.000225  | -8.40072 |
| 36         | 0.06025          | 0.02375  | 2.97E-07  | 0.000225  | -8.40073 |
| 38         | 0.06125          | 0.02275  | 2.84E-07  | 0.000225  | -8.40067 |
| 40         | 0.06225          | 0.026    | 3.25E-07  | 0.000225  | -8.40086 |
| 42         | 0.06275          | 0.026    | 3.25E-07  | 0.000225  | -8.40086 |
| 44         | 0.0635           | 0.02875  | 3.59E-07  | 0.000225  | -8.40101 |
| 46         | 0.064            | 0.02675  | 3.34E-07  | 0.000225  | -8.4009  |
| 48         | 0.06575          | 0.03225  | 4.03E-07  | 0.000225  | -8.4012  |
| 50         | 0.06675          | 0.03225  | 4.03E-07  | 0.000225  | -8.4012  |
| 52         | 0.067            | 0.033    | 4.13E-07  | 0.000225  | -8.40125 |
| 54         | 0.0675           | 0.0335   | 4.19E-07  | 0.000225  | -8.40127 |
| 56         | 0.0695           | 0.03625  | 4.53E-07  | 0.000225  | -8.40143 |
| 58         | 0.06975          | 0.0335   | 4.19E-07  | 0.000225  | -8.40127 |
| 60         | 0.071            | 0.0365   | 4.56E-07  | 0.000225  | -8.40144 |
| 62         | 0.0725           | 0.038    | 4.75E-07  | 0.000225  | -8.40152 |
| 64         | 0.07325          | 0.0385   | 4.81E-07  | 0.000225  | -8.40155 |
| 66         | 0.07425          | 0.03825  | 4.78E-07  | 0.000225  | -8.40154 |
| 68         | 0.07475          | 0.03925  | 4.91E-07  | 0.000225  | -8.40159 |
| 70         | 0.07675          | 0.043    | 5.38E-07  | 0.000224  | -8.4018  |
| 72         | 0.07775          | 0.04275  | 5.34E-07  | 0.000224  | -8.40179 |
| 74         | 0.07875          | 0.045    | 5.63E-07  | 0.000224  | -8.40191 |
| 76         | 0.079            | 0.044    | 5.5E-07   | 0.000224  | -8.40186 |
| 78         | 0.08025          | 0.0455   | 5.69E-07  | 0.000224  | -8.40194 |
| 80         | 0.082            | 0.04725  | 5.91E-07  | 0.000224  | -8.40204 |
| 82         | 0.08325          | 0.04925  | 6.16E-07  | 0.000224  | -8.40215 |
| 84         | 0.08325          | 0.0485   | 6.06E-07  | 0.000224  | -8.40211 |
| 86         | 0.08475          | 0.0485   | 6.06E-07  | 0.000224  | -8.40211 |

|     |         |         |          |          |          |
|-----|---------|---------|----------|----------|----------|
| 88  | 0.08625 | 0.05175 | 6.47E-07 | 0.000224 | -8.40229 |
| 90  | 0.0875  | 0.0535  | 6.69E-07 | 0.000224 | -8.40239 |
| 92  | 0.089   | 0.05525 | 6.91E-07 | 0.000224 | -8.40248 |
| 94  | 0.09    | 0.0545  | 6.81E-07 | 0.000224 | -8.40244 |
| 96  | 0.0915  | 0.05675 | 7.09E-07 | 0.000224 | -8.40257 |
| 98  | 0.0935  | 0.05825 | 7.28E-07 | 0.000224 | -8.40265 |
| 100 | 0.093   | 0.0575  | 7.19E-07 | 0.000224 | -8.40261 |
| 102 | 0.09475 | 0.05825 | 7.28E-07 | 0.000224 | -8.40265 |
| 104 | 0.096   | 0.0595  | 7.44E-07 | 0.000224 | -8.40272 |
| 106 | 0.097   | 0.06225 | 7.78E-07 | 0.000224 | -8.40287 |
| 108 | 0.0995  | 0.0635  | 7.94E-07 | 0.000224 | -8.40294 |
| 110 | 0.1005  | 0.06425 | 8.03E-07 | 0.000224 | -8.40299 |
| 112 | 0.1015  | 0.0655  | 8.19E-07 | 0.000224 | -8.40306 |
| 114 | 0.10225 | 0.06725 | 8.41E-07 | 0.000224 | -8.40315 |
| 116 | 0.104   | 0.0675  | 8.44E-07 | 0.000224 | -8.40317 |
| 118 | 0.10525 | 0.06925 | 8.66E-07 | 0.000224 | -8.40326 |
| 120 | 0.106   | 0.07    | 8.75E-07 | 0.000224 | -8.40331 |
| 122 | 0.10825 | 0.0715  | 8.94E-07 | 0.000224 | -8.40339 |
| 124 | 0.11025 | 0.07425 | 9.28E-07 | 0.000224 | -8.40354 |
| 126 | 0.1125  | 0.0755  | 9.44E-07 | 0.000224 | -8.40361 |
| 128 | 0.1125  | 0.076   | 9.5E-07  | 0.000224 | -8.40364 |
| 130 | 0.11525 | 0.0775  | 9.69E-07 | 0.000224 | -8.40373 |
| 132 | 0.11475 | 0.077   | 9.63E-07 | 0.000224 | -8.4037  |
| 134 | 0.1155  | 0.078   | 9.75E-07 | 0.000224 | -8.40375 |
| 136 | 0.118   | 0.0785  | 9.81E-07 | 0.000224 | -8.40378 |
| 138 | 0.11975 | 0.0855  | 1.07E-06 | 0.000224 | -8.40417 |
| 140 | 0.12075 | 0.083   | 1.04E-06 | 0.000224 | -8.40403 |
| 142 | 0.1225  | 0.08425 | 1.05E-06 | 0.000224 | -8.4041  |
| 144 | 0.124   | 0.0855  | 1.07E-06 | 0.000224 | -8.40417 |
| 146 | 0.124   | 0.0855  | 1.07E-06 | 0.000224 | -8.40417 |
| 148 | 0.12625 | 0.08675 | 1.08E-06 | 0.000224 | -8.40424 |
| 150 | 0.12725 | 0.08825 | 1.1E-06  | 0.000224 | -8.40432 |
| 152 | 0.12925 | 0.09125 | 1.14E-06 | 0.000224 | -8.40449 |
| 154 | 0.13025 | 0.09175 | 1.15E-06 | 0.000224 | -8.40452 |
| 156 | 0.1315  | 0.0925  | 1.16E-06 | 0.000224 | -8.40456 |
| 158 | 0.13425 | 0.095   | 1.19E-06 | 0.000224 | -8.4047  |
| 160 | 0.13425 | 0.09475 | 1.18E-06 | 0.000224 | -8.40469 |
| 162 | 0.1355  | 0.09625 | 1.2E-06  | 0.000224 | -8.40477 |
| 164 | 0.1375  | 0.0985  | 1.23E-06 | 0.000224 | -8.4049  |
| 166 | 0.139   | 0.10025 | 1.25E-06 | 0.000224 | -8.405   |
| 168 | 0.14025 | 0.1015  | 1.27E-06 | 0.000224 | -8.40507 |
| 170 | 0.142   | 0.10225 | 1.28E-06 | 0.000224 | -8.40511 |
| 172 | 0.14275 | 0.10375 | 1.3E-06  | 0.000224 | -8.40519 |
| 174 | 0.1445  | 0.1045  | 1.31E-06 | 0.000224 | -8.40523 |
| 176 | 0.1455  | 0.105   | 1.31E-06 | 0.000224 | -8.40526 |
| 178 | 0.148   | 0.1095  | 1.37E-06 | 0.000224 | -8.40551 |

|     |         |         |          |          |          |
|-----|---------|---------|----------|----------|----------|
| 180 | 0.14725 | 0.10925 | 1.37E-06 | 0.000224 | -8.4055  |
| 182 | 0.14925 | 0.1105  | 1.38E-06 | 0.000224 | -8.40557 |
| 184 | 0.15225 | 0.11275 | 1.41E-06 | 0.000224 | -8.40569 |
| 186 | 0.15275 | 0.11225 | 1.4E-06  | 0.000224 | -8.40567 |
| 188 | 0.156   | 0.11625 | 1.45E-06 | 0.000224 | -8.40589 |
| 190 | 0.156   | 0.1155  | 1.44E-06 | 0.000224 | -8.40585 |
| 192 | 0.15775 | 0.11775 | 1.47E-06 | 0.000224 | -8.40597 |
| 194 | 0.15925 | 0.11875 | 1.48E-06 | 0.000224 | -8.40603 |
| 196 | 0.161   | 0.12075 | 1.51E-06 | 0.000223 | -8.40614 |
| 198 | 0.163   | 0.12375 | 1.55E-06 | 0.000223 | -8.40631 |
| 200 | 0.1645  | 0.12525 | 1.57E-06 | 0.000223 | -8.40639 |
| 202 | 0.1655  | 0.1255  | 1.57E-06 | 0.000223 | -8.40641 |
| 204 | 0.1665  | 0.127   | 1.59E-06 | 0.000223 | -8.40649 |
| 206 | 0.16925 | 0.12875 | 1.61E-06 | 0.000223 | -8.40659 |
| 208 | 0.16925 | 0.12825 | 1.6E-06  | 0.000223 | -8.40656 |
| 210 | 0.17125 | 0.12975 | 1.62E-06 | 0.000223 | -8.40664 |
| 212 | 0.1725  | 0.131   | 1.64E-06 | 0.000223 | -8.40671 |
| 214 | 0.17475 | 0.1335  | 1.67E-06 | 0.000223 | -8.40685 |
| 216 | 0.17625 | 0.13525 | 1.69E-06 | 0.000223 | -8.40695 |
| 218 | 0.17775 | 0.13525 | 1.69E-06 | 0.000223 | -8.40695 |
| 220 | 0.18    | 0.138   | 1.73E-06 | 0.000223 | -8.40711 |
| 222 | 0.18075 | 0.14    | 1.75E-06 | 0.000223 | -8.40722 |
| 224 | 0.18225 | 0.14175 | 1.77E-06 | 0.000223 | -8.40732 |
| 226 | 0.18425 | 0.14275 | 1.78E-06 | 0.000223 | -8.40737 |
| 228 | 0.18675 | 0.1455  | 1.82E-06 | 0.000223 | -8.40753 |
| 230 | 0.18725 | 0.145   | 1.81E-06 | 0.000223 | -8.4075  |
| 232 | 0.1885  | 0.1465  | 1.83E-06 | 0.000223 | -8.40758 |
| 234 | 0.18975 | 0.14725 | 1.84E-06 | 0.000223 | -8.40762 |
| 236 | 0.192   | 0.1505  | 1.88E-06 | 0.000223 | -8.40781 |
| 238 | 0.19175 | 0.14975 | 1.87E-06 | 0.000223 | -8.40776 |
| 240 | 0.195   | 0.15225 | 1.9E-06  | 0.000223 | -8.4079  |
| 242 | 0.1955  | 0.15275 | 1.91E-06 | 0.000223 | -8.40793 |
| 244 | 0.197   | 0.15425 | 1.93E-06 | 0.000223 | -8.40802 |
| 246 | 0.20025 | 0.15775 | 1.97E-06 | 0.000223 | -8.40821 |
| 248 | 0.2005  | 0.1585  | 1.98E-06 | 0.000223 | -8.40825 |
| 250 | 0.203   | 0.16075 | 2.01E-06 | 0.000223 | -8.40838 |
| 252 | 0.20425 | 0.16175 | 2.02E-06 | 0.000223 | -8.40844 |
| 254 | 0.206   | 0.1635  | 2.04E-06 | 0.000223 | -8.40853 |
| 256 | 0.2075  | 0.16375 | 2.05E-06 | 0.000223 | -8.40855 |
| 258 | 0.2085  | 0.16425 | 2.05E-06 | 0.000223 | -8.40858 |
| 260 | 0.21025 | 0.167   | 2.09E-06 | 0.000223 | -8.40873 |
| 262 | 0.2125  | 0.168   | 2.1E-06  | 0.000223 | -8.40879 |
| 264 | 0.21375 | 0.17075 | 2.13E-06 | 0.000223 | -8.40894 |
| 266 | 0.214   | 0.1705  | 2.13E-06 | 0.000223 | -8.40893 |
| 268 | 0.21625 | 0.17225 | 2.15E-06 | 0.000223 | -8.40903 |
| 270 | 0.219   | 0.17575 | 2.2E-06  | 0.000223 | -8.40922 |



|     |         |         |          |          |          |
|-----|---------|---------|----------|----------|----------|
| 272 | 0.2195  | 0.17575 | 2.2E-06  | 0.000223 | -8.40922 |
| 274 | 0.22175 | 0.176   | 2.2E-06  | 0.000223 | -8.40924 |
| 276 | 0.22325 | 0.179   | 2.24E-06 | 0.000223 | -8.4094  |
| 278 | 0.225   | 0.1805  | 2.26E-06 | 0.000223 | -8.40949 |
| 280 | 0.22725 | 0.18325 | 2.29E-06 | 0.000223 | -8.40964 |
| 282 | 0.229   | 0.18525 | 2.32E-06 | 0.000223 | -8.40976 |
| 284 | 0.23025 | 0.18625 | 2.33E-06 | 0.000223 | -8.40981 |
| 286 | 0.233   | 0.18775 | 2.35E-06 | 0.000223 | -8.4099  |
| 288 | 0.23175 | 0.18675 | 2.33E-06 | 0.000223 | -8.40984 |
| 290 | 0.23375 | 0.1895  | 2.37E-06 | 0.000223 | -8.40999 |
| 292 | 0.237   | 0.19275 | 2.41E-06 | 0.000223 | -8.41018 |
| 294 | 0.238   | 0.193   | 2.41E-06 | 0.000223 | -8.41019 |
| 296 | 0.2385  | 0.19425 | 2.43E-06 | 0.000223 | -8.41026 |
| 298 | 0.24125 | 0.196   | 2.45E-06 | 0.000223 | -8.41036 |

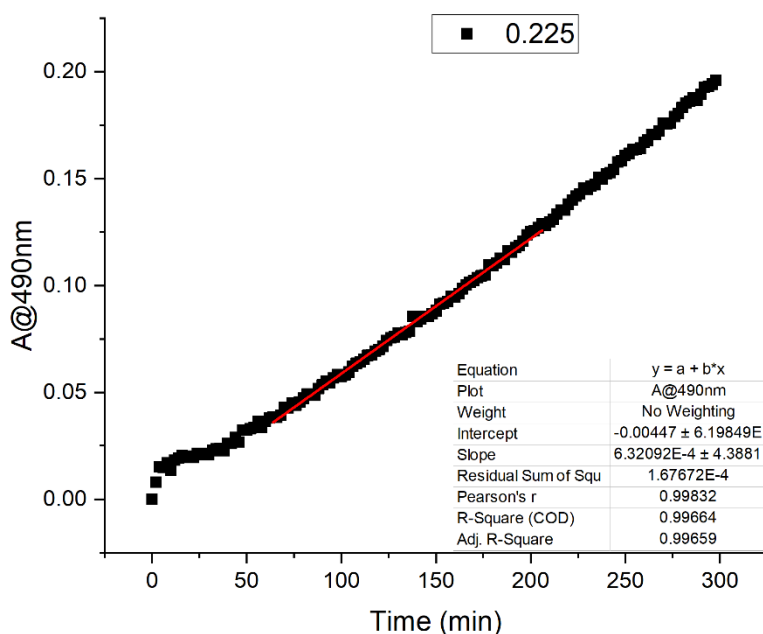

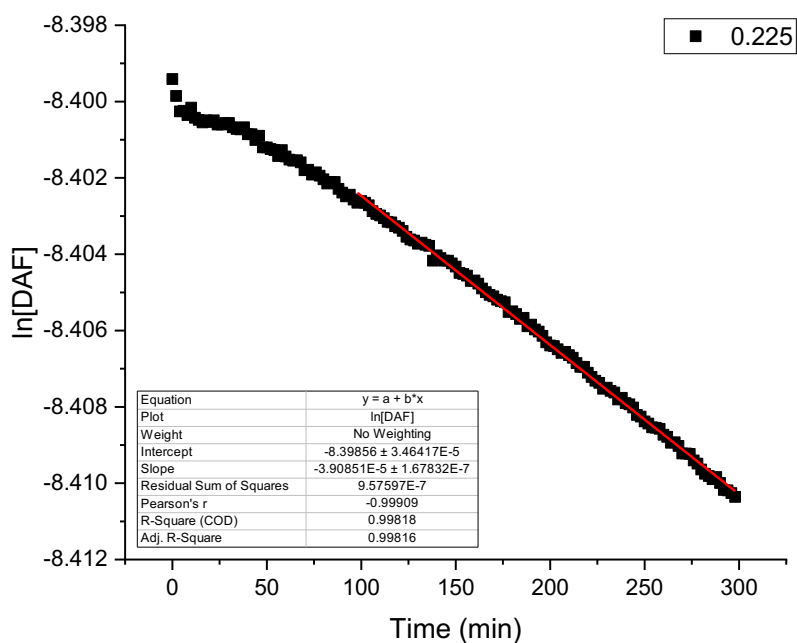

#### 0.250 mM DAF

| Time (min) | A@490nm minus BK | set to 0 | [FLU] (M) | [DAF] (M) | ln[DAF]  |
|------------|------------------|----------|-----------|-----------|----------|
| 0          | 0.05775          | 0        | 0         | 0.00025   | -8.29405 |
| 2          | 0.0595           | -0.00225 | -2.8E-08  | 0.00025   | -8.29394 |
| 4          | 0.06075          | 0.00225  | 2.81E-08  | 0.00025   | -8.29416 |
| 6          | 0.0605           | 0.00475  | 5.94E-08  | 0.00025   | -8.29429 |
| 8          | 0.0615           | 0.0055   | 6.88E-08  | 0.00025   | -8.29432 |
| 10         | 0.06225          | 0.00975  | 1.22E-07  | 0.00025   | -8.29454 |
| 12         | 0.06175          | 0.00875  | 1.09E-07  | 0.00025   | -8.29449 |
| 14         | 0.06125          | 0.00825  | 1.03E-07  | 0.00025   | -8.29446 |
| 16         | 0.065            | 0.01275  | 1.59E-07  | 0.00025   | -8.29469 |
| 18         | 0.0625           | 0.01225  | 1.53E-07  | 0.00025   | -8.29466 |
| 20         | 0.06425          | 0.01075  | 1.34E-07  | 0.00025   | -8.29459 |
| 22         | 0.06475          | 0.011    | 1.38E-07  | 0.00025   | -8.2946  |
| 24         | 0.06425          | 0.01275  | 1.59E-07  | 0.00025   | -8.29469 |
| 26         | 0.065            | 0.0125   | 1.56E-07  | 0.00025   | -8.29467 |
| 28         | 0.0655           | 0.00525  | 6.56E-08  | 0.00025   | -8.29431 |
| 30         | 0.067            | 0.01475  | 1.84E-07  | 0.00025   | -8.29479 |
| 32         | 0.0665           | -0.00225 | -2.8E-08  | 0.00025   | -8.29394 |
| 34         | 0.06875          | 0.0105   | 1.31E-07  | 0.00025   | -8.29457 |
| 36         | 0.0685           | 0.01575  | 1.97E-07  | 0.00025   | -8.29484 |
| 38         | 0.0695           | 2.50E-04 | 3.13E-09  | 0.00025   | -8.29406 |
| 40         | 0.06975          | 0.01075  | 1.34E-07  | 0.00025   | -8.29459 |
| 42         | 0.07075          | 0.021    | 2.63E-07  | 0.00025   | -8.2951  |
| 44         | 0.07225          | 0.00275  | 3.44E-08  | 0.00025   | -8.29419 |
| 46         | 0.0715           | -0.00325 | -4.1E-08  | 0.00025   | -8.29389 |
| 48         | 0.07275          | -0.01725 | -2.2E-07  | 0.00025   | -8.29319 |

|     |         |           |          |          |          |
|-----|---------|-----------|----------|----------|----------|
| 50  | 0.075   | 0.01525   | 1.91E-07 | 0.00025  | -8.29481 |
| 52  | 0.07475 | 0.02525   | 3.16E-07 | 0.00025  | -8.29531 |
| 54  | 0.07475 | 0.0245    | 3.06E-07 | 0.00025  | -8.29528 |
| 56  | 0.076   | 0.0125    | 1.56E-07 | 0.00025  | -8.29467 |
| 58  | 0.0765  | 0.0255    | 3.19E-07 | 0.00025  | -8.29533 |
| 60  | 0.078   | 0.02725   | 3.41E-07 | 0.00025  | -8.29541 |
| 62  | 0.08025 | 0.03075   | 3.84E-07 | 0.00025  | -8.29559 |
| 64  | 0.0795  | 0.00325   | 4.06E-08 | 0.00025  | -8.29421 |
| 66  | 0.0805  | -7.50E-04 | -9.4E-09 | 0.00025  | -8.29401 |
| 68  | 0.081   | 0.0295    | 3.69E-07 | 0.00025  | -8.29553 |
| 70  | 0.0815  | 0.02825   | 3.53E-07 | 0.00025  | -8.29546 |
| 72  | 0.0835  | 0.0325    | 4.06E-07 | 0.00025  | -8.29568 |
| 74  | 0.08525 | 0.035     | 4.38E-07 | 0.00025  | -8.2958  |
| 76  | 0.08575 | 0.0355    | 4.44E-07 | 0.00025  | -8.29583 |
| 78  | 0.08725 | 0.03475   | 4.34E-07 | 0.00025  | -8.29579 |
| 80  | 0.08875 | 0.0235    | 2.94E-07 | 0.00025  | -8.29523 |
| 82  | 0.08925 | 0.0235    | 2.94E-07 | 0.00025  | -8.29523 |
| 84  | 0.0895  | 0.019     | 2.38E-07 | 0.00025  | -8.295   |
| 86  | 0.09175 | 0.04075   | 5.09E-07 | 0.000249 | -8.29609 |
| 88  | 0.09225 | 0.042     | 5.25E-07 | 0.000249 | -8.29615 |
| 90  | 0.0945  | 0.04175   | 5.22E-07 | 0.000249 | -8.29614 |
| 92  | 0.095   | 0.0445    | 5.56E-07 | 0.000249 | -8.29628 |
| 94  | 0.09675 | 0.0455    | 5.69E-07 | 0.000249 | -8.29633 |
| 96  | 0.097   | 0.045     | 5.63E-07 | 0.000249 | -8.2963  |
| 98  | 0.099   | 0.02325   | 2.91E-07 | 0.00025  | -8.29521 |
| 100 | 0.099   | 0.02425   | 3.03E-07 | 0.00025  | -8.29526 |
| 102 | 0.09975 | 0.03075   | 3.84E-07 | 0.00025  | -8.29559 |
| 104 | 0.10125 | 0.0425    | 5.31E-07 | 0.000249 | -8.29618 |
| 106 | 0.10275 | 0.05275   | 6.59E-07 | 0.000249 | -8.29669 |
| 108 | 0.105   | 0.05325   | 6.66E-07 | 0.000249 | -8.29672 |
| 110 | 0.106   | 0.03325   | 4.16E-07 | 0.00025  | -8.29571 |
| 112 | 0.10725 | 0.0535    | 6.69E-07 | 0.000249 | -8.29673 |
| 114 | 0.10825 | 0.04075   | 5.09E-07 | 0.000249 | -8.29609 |
| 116 | 0.10975 | 0.043     | 5.38E-07 | 0.000249 | -8.2962  |
| 118 | 0.11175 | 0.04475   | 5.59E-07 | 0.000249 | -8.29629 |
| 120 | 0.11225 | 0.04025   | 5.03E-07 | 0.000249 | -8.29606 |
| 122 | 0.1135  | 0.04775   | 5.97E-07 | 0.000249 | -8.29644 |
| 124 | 0.115   | 0.06475   | 8.09E-07 | 0.000249 | -8.29729 |
| 126 | 0.1175  | 0.035     | 4.38E-07 | 0.00025  | -8.2958  |
| 128 | 0.11975 | 0.0565    | 7.06E-07 | 0.000249 | -8.29688 |
| 130 | 0.1205  | 0.059     | 7.38E-07 | 0.000249 | -8.297   |
| 132 | 0.12325 | 0.07175   | 8.97E-07 | 0.000249 | -8.29764 |
| 134 | 0.12275 | 0.0705    | 8.81E-07 | 0.000249 | -8.29758 |
| 136 | 0.12325 | 0.0415    | 5.19E-07 | 0.000249 | -8.29613 |
| 138 | 0.1265  | 0.03825   | 4.78E-07 | 0.00025  | -8.29596 |
| 140 | 0.12575 | 0.074     | 9.25E-07 | 0.000249 | -8.29776 |

|     |         |         |          |          |          |
|-----|---------|---------|----------|----------|----------|
| 142 | 0.12725 | 0.07525 | 9.41E-07 | 0.000249 | -8.29782 |
| 144 | 0.12975 | 0.074   | 9.25E-07 | 0.000249 | -8.29776 |
| 146 | 0.13    | 0.064   | 8E-07    | 0.000249 | -8.29725 |
| 148 | 0.13325 | 0.079   | 9.88E-07 | 0.000249 | -8.29801 |
| 150 | 0.134   | 0.0745  | 9.31E-07 | 0.000249 | -8.29778 |
| 152 | 0.136   | 0.08425 | 1.05E-06 | 0.000249 | -8.29827 |
| 154 | 0.138   | 0.0795  | 9.94E-07 | 0.000249 | -8.29803 |
| 156 | 0.1395  | 0.06    | 7.5E-07  | 0.000249 | -8.29705 |
| 158 | 0.14125 | 0.088   | 1.1E-06  | 0.000249 | -8.29846 |
| 160 | 0.141   | 0.05225 | 6.53E-07 | 0.000249 | -8.29667 |
| 162 | 0.142   | 0.0625  | 7.81E-07 | 0.000249 | -8.29718 |
| 164 | 0.14425 | 0.09075 | 1.13E-06 | 0.000249 | -8.2986  |
| 166 | 0.146   | 0.08875 | 1.11E-06 | 0.000249 | -8.2985  |
| 168 | 0.14675 | 0.069   | 8.63E-07 | 0.000249 | -8.29751 |
| 170 | 0.14875 | 0.07975 | 9.97E-07 | 0.000249 | -8.29805 |
| 172 | 0.148   | 0.0955  | 1.19E-06 | 0.000249 | -8.29884 |
| 174 | 0.151   | 0.09825 | 1.23E-06 | 0.000249 | -8.29897 |
| 176 | 0.15375 | 0.0985  | 1.23E-06 | 0.000249 | -8.29899 |
| 178 | 0.15425 | 0.10125 | 1.27E-06 | 0.000249 | -8.29912 |
| 180 | 0.15475 | 0.08675 | 1.08E-06 | 0.000249 | -8.2984  |
| 182 | 0.15775 | 0.0975  | 1.22E-06 | 0.000249 | -8.29894 |
| 184 | 0.158   | 0.1045  | 1.31E-06 | 0.000249 | -8.29929 |
| 186 | 0.1605  | 0.10575 | 1.32E-06 | 0.000249 | -8.29935 |
| 188 | 0.16175 | 0.10775 | 1.35E-06 | 0.000249 | -8.29945 |
| 190 | 0.16275 | 0.10975 | 1.37E-06 | 0.000249 | -8.29955 |
| 192 | 0.16525 | 0.11175 | 1.4E-06  | 0.000249 | -8.29965 |
| 194 | 0.16675 | 0.11325 | 1.42E-06 | 0.000249 | -8.29973 |
| 196 | 0.16775 | 0.1145  | 1.43E-06 | 0.000249 | -8.29979 |
| 198 | 0.171   | 0.11825 | 1.48E-06 | 0.000249 | -8.29998 |
| 200 | 0.1715  | 0.11075 | 1.38E-06 | 0.000249 | -8.2996  |
| 202 | 0.17625 | 0.10225 | 1.28E-06 | 0.000249 | -8.29918 |
| 204 | 0.17375 | 0.1195  | 1.49E-06 | 0.000249 | -8.30004 |
| 206 | 0.17475 | 0.1215  | 1.52E-06 | 0.000248 | -8.30014 |
| 208 | 0.17675 | 0.1195  | 1.49E-06 | 0.000249 | -8.30004 |
| 210 | 0.179   | 0.1055  | 1.32E-06 | 0.000249 | -8.29934 |
| 212 | 0.17975 | 0.111   | 1.39E-06 | 0.000249 | -8.29962 |
| 214 | 0.1825  | 0.0925  | 1.16E-06 | 0.000249 | -8.29869 |
| 216 | 0.18325 | 0.1035  | 1.29E-06 | 0.000249 | -8.29924 |
| 218 | 0.18625 | 0.13075 | 1.63E-06 | 0.000248 | -8.30061 |
| 220 | 0.18675 | 0.13075 | 1.63E-06 | 0.000248 | -8.30061 |
| 222 | 0.18875 | 0.1245  | 1.56E-06 | 0.000248 | -8.30029 |
| 224 | 0.18925 | 0.13025 | 1.63E-06 | 0.000248 | -8.30058 |
| 226 | 0.193   | 0.11225 | 1.4E-06  | 0.000249 | -8.29968 |
| 228 | 0.193   | 0.10225 | 1.28E-06 | 0.000249 | -8.29918 |
| 230 | 0.195   | 0.13925 | 1.74E-06 | 0.000248 | -8.30104 |
| 232 | 0.1955  | 0.1395  | 1.74E-06 | 0.000248 | -8.30105 |

|     |         |         |          |          |          |
|-----|---------|---------|----------|----------|----------|
| 234 | 0.1975  | 0.128   | 1.6E-06  | 0.000248 | -8.30047 |
| 236 | 0.199   | 0.1435  | 1.79E-06 | 0.000248 | -8.30125 |
| 238 | 0.19975 | 0.14475 | 1.81E-06 | 0.000248 | -8.30131 |
| 240 | 0.20375 | 0.117   | 1.46E-06 | 0.000249 | -8.29992 |
| 242 | 0.2055  | 0.1455  | 1.82E-06 | 0.000248 | -8.30135 |
| 244 | 0.20425 | 0.14875 | 1.86E-06 | 0.000248 | -8.30151 |
| 246 | 0.20825 | 0.15325 | 1.92E-06 | 0.000248 | -8.30174 |
| 248 | 0.20875 | 0.153   | 1.91E-06 | 0.000248 | -8.30173 |
| 250 | 0.20925 | 0.154   | 1.93E-06 | 0.000248 | -8.30178 |
| 252 | 0.21175 | 0.15525 | 1.94E-06 | 0.000248 | -8.30184 |
| 254 | 0.2145  | 0.1555  | 1.94E-06 | 0.000248 | -8.30186 |
| 256 | 0.21525 | 0.15    | 1.88E-06 | 0.000248 | -8.30158 |
| 258 | 0.21675 | 0.15925 | 1.99E-06 | 0.000248 | -8.30204 |
| 260 | 0.21875 | 0.162   | 2.03E-06 | 0.000248 | -8.30218 |
| 262 | 0.21975 | 0.163   | 2.04E-06 | 0.000248 | -8.30223 |
| 264 | 0.222   | 0.1655  | 2.07E-06 | 0.000248 | -8.30236 |
| 266 | 0.223   | 0.167   | 2.09E-06 | 0.000248 | -8.30243 |
| 268 | 0.22525 | 0.16825 | 2.1E-06  | 0.000248 | -8.3025  |
| 270 | 0.228   | 0.17    | 2.13E-06 | 0.000248 | -8.30259 |
| 272 | 0.2275  | 0.17    | 2.13E-06 | 0.000248 | -8.30259 |
| 274 | 0.23025 | 0.139   | 1.74E-06 | 0.000248 | -8.30102 |
| 276 | 0.2315  | 0.16825 | 2.1E-06  | 0.000248 | -8.3025  |
| 278 | 0.233   | 0.17525 | 2.19E-06 | 0.000248 | -8.30285 |
| 280 | 0.23575 | 0.1775  | 2.22E-06 | 0.000248 | -8.30296 |
| 282 | 0.23875 | 0.182   | 2.28E-06 | 0.000248 | -8.30319 |
| 284 | 0.23925 | 0.18175 | 2.27E-06 | 0.000248 | -8.30318 |
| 286 | 0.23975 | 0.1815  | 2.27E-06 | 0.000248 | -8.30317 |
| 288 | 0.24125 | 0.1775  | 2.22E-06 | 0.000248 | -8.30296 |
| 290 | 0.24425 | 0.18725 | 2.34E-06 | 0.000248 | -8.30346 |
| 292 | 0.2455  | 0.18775 | 2.35E-06 | 0.000248 | -8.30348 |
| 294 | 0.246   | 0.189   | 2.36E-06 | 0.000248 | -8.30354 |
| 296 | 0.24875 | 0.1675  | 2.09E-06 | 0.000248 | -8.30246 |
| 298 | 0.24975 | 0.19125 | 2.39E-06 | 0.000248 | -8.30366 |

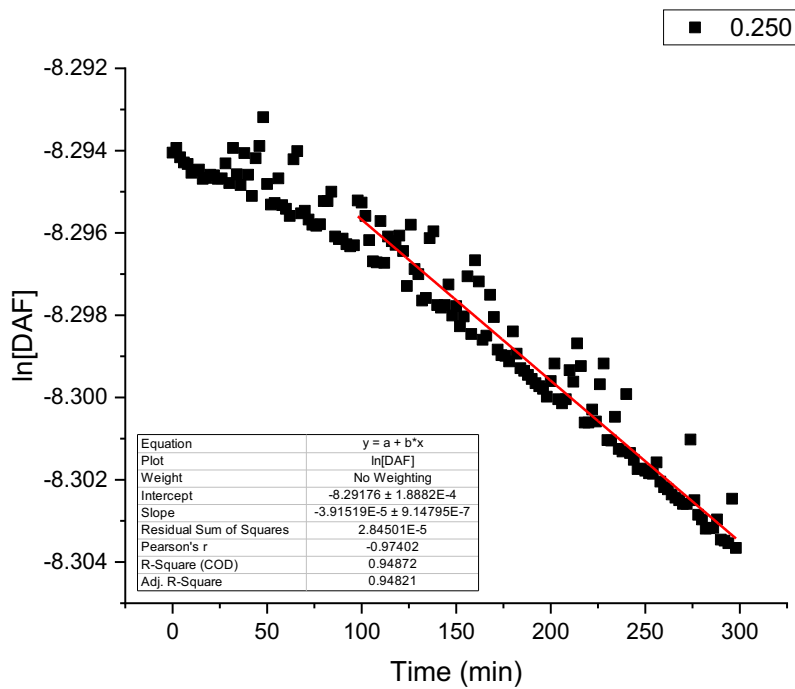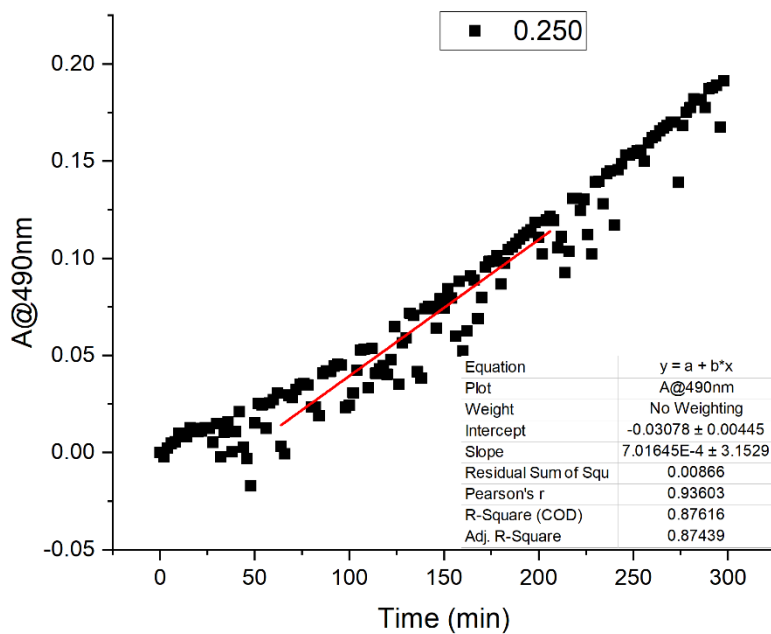

0.275 mM DAF

| Time (min) | A@490nm minus BK | set to 0 | [FLU] (M) | [DAF] (M) | ln[DAF]  |
|------------|------------------|----------|-----------|-----------|----------|
| 0          | 0.06125          | 0        | 0         | 0.000275  | -8.19874 |
| 2          | 0.06275          | 0.0045   | 5.63E-08  | 0.000275  | -8.19894 |
| 4          | 0.06275          | 0.00375  | 4.69E-08  | 0.000275  | -8.19891 |
| 6          | 0.06425          | -0.00875 | -1.1E-07  | 0.000275  | -8.19834 |
| 8          | 0.06425          | -0.0045  | -5.6E-08  | 0.000275  | -8.19853 |
| 10         | 0.06475          | 0.00625  | 7.81E-08  | 0.000275  | -8.19902 |

|     |         |           |          |          |          |
|-----|---------|-----------|----------|----------|----------|
| 12  | 0.06575 | -0.00875  | -1.1E-07 | 0.000275 | -8.19834 |
| 14  | 0.065   | 0         | 0        | 0.000275 | -8.19874 |
| 16  | 0.0665  | -0.009    | -1.1E-07 | 0.000275 | -8.19833 |
| 18  | 0.06525 | 0.0065    | 8.13E-08 | 0.000275 | -8.19903 |
| 20  | 0.06525 | 0.0035    | 4.38E-08 | 0.000275 | -8.1989  |
| 22  | 0.0665  | 0.0025    | 3.13E-08 | 0.000275 | -8.19885 |
| 24  | 0.0665  | 2.50E-04  | 3.13E-09 | 0.000275 | -8.19875 |
| 26  | 0.0675  | 0.00325   | 4.06E-08 | 0.000275 | -8.19889 |
| 28  | 0.06875 | 0.009     | 1.13E-07 | 0.000275 | -8.19915 |
| 30  | 0.07    | 0.00425   | 5.31E-08 | 0.000275 | -8.19893 |
| 32  | 0.0695  | 0.00675   | 8.44E-08 | 0.000275 | -8.19905 |
| 34  | 0.07    | 0.0035    | 4.38E-08 | 0.000275 | -8.1989  |
| 36  | 0.071   | 0.00725   | 9.06E-08 | 0.000275 | -8.19907 |
| 38  | 0.0735  | 0.00425   | 5.31E-08 | 0.000275 | -8.19893 |
| 40  | 0.0735  | 0.00275   | 3.44E-08 | 0.000275 | -8.19886 |
| 42  | 0.0765  | 0.00525   | 6.56E-08 | 0.000275 | -8.19898 |
| 44  | 0.0745  | 0.0125    | 1.56E-07 | 0.000275 | -8.19931 |
| 46  | 0.07425 | 0.007     | 8.75E-08 | 0.000275 | -8.19906 |
| 48  | 0.07625 | 0.00175   | 2.19E-08 | 0.000275 | -8.19882 |
| 50  | 0.07725 | -5.00E-04 | -6.3E-09 | 0.000275 | -8.19872 |
| 52  | 0.0765  | 0.00525   | 6.56E-08 | 0.000275 | -8.19898 |
| 54  | 0.078   | 0.00975   | 1.22E-07 | 0.000275 | -8.19918 |
| 56  | 0.08025 | 0.00625   | 7.81E-08 | 0.000275 | -8.19902 |
| 58  | 0.08025 | 0.017     | 2.13E-07 | 0.000275 | -8.19951 |
| 60  | 0.08125 | 0.01975   | 2.47E-07 | 0.000275 | -8.19964 |
| 62  | 0.0825  | 0.005     | 6.25E-08 | 0.000275 | -8.19897 |
| 64  | 0.0835  | 0.02125   | 2.66E-07 | 0.000275 | -8.19971 |
| 66  | 0.085   | 0.02175   | 2.72E-07 | 0.000275 | -8.19973 |
| 68  | 0.084   | 0.007     | 8.75E-08 | 0.000275 | -8.19906 |
| 70  | 0.0855  | 0.00725   | 9.06E-08 | 0.000275 | -8.19907 |
| 72  | 0.0865  | 0.0245    | 3.06E-07 | 0.000275 | -8.19985 |
| 74  | 0.08725 | 0.02175   | 2.72E-07 | 0.000275 | -8.19973 |
| 76  | 0.08875 | 0.016     | 2E-07    | 0.000275 | -8.19947 |
| 78  | 0.09025 | 0.02375   | 2.97E-07 | 0.000275 | -8.19982 |
| 80  | 0.091   | 0.01725   | 2.16E-07 | 0.000275 | -8.19952 |
| 82  | 0.0915  | 0.02575   | 3.22E-07 | 0.000275 | -8.19991 |
| 84  | 0.091   | 0.01625   | 2.03E-07 | 0.000275 | -8.19948 |
| 86  | 0.0955  | 0.0225    | 2.81E-07 | 0.000275 | -8.19976 |
| 88  | 0.095   | 0.0305    | 3.81E-07 | 0.000275 | -8.20013 |
| 90  | 0.09625 | 0.019     | 2.38E-07 | 0.000275 | -8.1996  |
| 92  | 0.09725 | 0.026     | 3.25E-07 | 0.000275 | -8.19992 |
| 94  | 0.09925 | 0.02      | 2.5E-07  | 0.000275 | -8.19965 |
| 96  | 0.1     | 0.033     | 4.13E-07 | 0.000275 | -8.20024 |
| 98  | 0.1025  | 0.0265    | 3.31E-07 | 0.000275 | -8.19994 |
| 100 | 0.10275 | 0.0285    | 3.56E-07 | 0.000275 | -8.20004 |
| 102 | 0.104   | 0.03475   | 4.34E-07 | 0.000275 | -8.20032 |

|     |         |         |          |          |          |
|-----|---------|---------|----------|----------|----------|
| 104 | 0.1045  | 0.037   | 4.63E-07 | 0.000275 | -8.20042 |
| 106 | 0.107   | 0.04025 | 5.03E-07 | 0.000274 | -8.20057 |
| 108 | 0.109   | 0.04075 | 5.09E-07 | 0.000274 | -8.20059 |
| 110 | 0.1085  | 0.0295  | 3.69E-07 | 0.000275 | -8.20008 |
| 112 | 0.10975 | 0.03175 | 3.97E-07 | 0.000275 | -8.20018 |
| 114 | 0.1105  | 0.04575 | 5.72E-07 | 0.000274 | -8.20082 |
| 116 | 0.1125  | 0.04675 | 5.84E-07 | 0.000274 | -8.20087 |
| 118 | 0.1145  | 0.03025 | 3.78E-07 | 0.000275 | -8.20012 |
| 120 | 0.11575 | 0.03575 | 4.47E-07 | 0.000275 | -8.20037 |
| 122 | 0.117   | 0.044   | 5.5E-07  | 0.000274 | -8.20074 |
| 124 | 0.1175  | 0.0395  | 4.94E-07 | 0.000275 | -8.20054 |
| 126 | 0.11975 | 0.0455  | 5.69E-07 | 0.000274 | -8.20081 |
| 128 | 0.1215  | 0.05225 | 6.53E-07 | 0.000274 | -8.20112 |
| 130 | 0.124   | 0.0485  | 6.06E-07 | 0.000274 | -8.20095 |
| 132 | 0.12375 | 0.05    | 6.25E-07 | 0.000274 | -8.20101 |
| 134 | 0.12575 | 0.04425 | 5.53E-07 | 0.000274 | -8.20075 |
| 136 | 0.12625 | 0.05425 | 6.78E-07 | 0.000274 | -8.20121 |
| 138 | 0.129   | 0.0495  | 6.19E-07 | 0.000274 | -8.20099 |
| 140 | 0.12875 | 0.0625  | 7.81E-07 | 0.000274 | -8.20158 |
| 142 | 0.131   | 0.06425 | 8.03E-07 | 0.000274 | -8.20166 |
| 144 | 0.13125 | 0.05025 | 6.28E-07 | 0.000274 | -8.20103 |
| 146 | 0.13275 | 0.06025 | 7.53E-07 | 0.000274 | -8.20148 |
| 148 | 0.1355  | 0.06275 | 7.84E-07 | 0.000274 | -8.2016  |
| 150 | 0.13625 | 0.0575  | 7.19E-07 | 0.000274 | -8.20136 |
| 152 | 0.137   | 0.05725 | 7.16E-07 | 0.000274 | -8.20135 |
| 154 | 0.13975 | 0.06975 | 8.72E-07 | 0.000274 | -8.20191 |
| 156 | 0.14075 | 0.067   | 8.38E-07 | 0.000274 | -8.20179 |
| 158 | 0.1425  | 0.07525 | 9.41E-07 | 0.000274 | -8.20217 |
| 160 | 0.144   | 0.07625 | 9.53E-07 | 0.000274 | -8.20221 |
| 162 | 0.14525 | 0.0685  | 8.56E-07 | 0.000274 | -8.20186 |
| 164 | 0.1465  | 0.06825 | 8.53E-07 | 0.000274 | -8.20185 |
| 166 | 0.1475  | 0.079   | 9.88E-07 | 0.000274 | -8.20234 |
| 168 | 0.1495  | 0.08225 | 1.03E-06 | 0.000274 | -8.20249 |
| 170 | 0.151   | 0.08225 | 1.03E-06 | 0.000274 | -8.20249 |
| 172 | 0.1515  | 0.082   | 1.03E-06 | 0.000274 | -8.20247 |
| 174 | 0.15475 | 0.0875  | 1.09E-06 | 0.000274 | -8.20272 |
| 176 | 0.156   | 0.075   | 9.38E-07 | 0.000274 | -8.20215 |
| 178 | 0.15725 | 0.082   | 1.03E-06 | 0.000274 | -8.20247 |
| 180 | 0.157   | 0.08825 | 1.1E-06  | 0.000274 | -8.20276 |
| 182 | 0.1595  | 0.0785  | 9.81E-07 | 0.000274 | -8.20231 |
| 184 | 0.16175 | 0.09075 | 1.13E-06 | 0.000274 | -8.20287 |
| 186 | 0.1625  | 0.08425 | 1.05E-06 | 0.000274 | -8.20258 |
| 188 | 0.1655  | 0.08725 | 1.09E-06 | 0.000274 | -8.20271 |
| 190 | 0.168   | 0.098   | 1.23E-06 | 0.000274 | -8.2032  |
| 192 | 0.16875 | 0.093   | 1.16E-06 | 0.000274 | -8.20298 |
| 194 | 0.17    | 0.088   | 1.1E-06  | 0.000274 | -8.20275 |



|     |         |         |          |          |          |
|-----|---------|---------|----------|----------|----------|
| 196 | 0.171   | 0.09275 | 1.16E-06 | 0.000274 | -8.20296 |
| 198 | 0.17425 | 0.10625 | 1.33E-06 | 0.000274 | -8.20358 |
| 200 | 0.1745  | 0.091   | 1.14E-06 | 0.000274 | -8.20288 |
| 202 | 0.176   | 0.098   | 1.23E-06 | 0.000274 | -8.2032  |
| 204 | 0.17725 | 0.10275 | 1.28E-06 | 0.000274 | -8.20342 |
| 206 | 0.17925 | 0.099   | 1.24E-06 | 0.000274 | -8.20325 |
| 208 | 0.18    | 0.09725 | 1.22E-06 | 0.000274 | -8.20317 |
| 210 | 0.1815  | 0.10325 | 1.29E-06 | 0.000274 | -8.20344 |
| 212 | 0.1835  | 0.10575 | 1.32E-06 | 0.000274 | -8.20356 |
| 214 | 0.18525 | 0.111   | 1.39E-06 | 0.000274 | -8.2038  |
| 216 | 0.187   | 0.11375 | 1.42E-06 | 0.000274 | -8.20392 |
| 218 | 0.18725 | 0.10825 | 1.35E-06 | 0.000274 | -8.20367 |
| 220 | 0.1905  | 0.118   | 1.48E-06 | 0.000274 | -8.20412 |
| 222 | 0.19125 | 0.109   | 1.36E-06 | 0.000274 | -8.20371 |
| 224 | 0.19275 | 0.10925 | 1.37E-06 | 0.000274 | -8.20372 |
| 226 | 0.19475 | 0.1135  | 1.42E-06 | 0.000274 | -8.20391 |
| 228 | 0.19575 | 0.11275 | 1.41E-06 | 0.000274 | -8.20388 |
| 230 | 0.19625 | 0.114   | 1.43E-06 | 0.000274 | -8.20393 |
| 232 | 0.19975 | 0.11875 | 1.48E-06 | 0.000274 | -8.20415 |
| 234 | 0.20075 | 0.119   | 1.49E-06 | 0.000274 | -8.20416 |
| 236 | 0.2025  | 0.11775 | 1.47E-06 | 0.000274 | -8.20411 |
| 238 | 0.203   | 0.1315  | 1.64E-06 | 0.000273 | -8.20473 |
| 240 | 0.205   | 0.12825 | 1.6E-06  | 0.000273 | -8.20459 |
| 242 | 0.20725 | 0.126   | 1.58E-06 | 0.000273 | -8.20448 |
| 244 | 0.209   | 0.1375  | 1.72E-06 | 0.000273 | -8.20501 |
| 246 | 0.2105  | 0.125   | 1.56E-06 | 0.000273 | -8.20444 |
| 248 | 0.21225 | 0.132   | 1.65E-06 | 0.000273 | -8.20476 |
| 250 | 0.214   | 0.13225 | 1.65E-06 | 0.000273 | -8.20477 |
| 252 | 0.21625 | 0.13475 | 1.68E-06 | 0.000273 | -8.20488 |
| 254 | 0.21675 | 0.13775 | 1.72E-06 | 0.000273 | -8.20502 |
| 256 | 0.21925 | 0.14825 | 1.85E-06 | 0.000273 | -8.2055  |
| 258 | 0.22    | 0.14875 | 1.86E-06 | 0.000273 | -8.20552 |
| 260 | 0.2225  | 0.143   | 1.79E-06 | 0.000273 | -8.20526 |
| 262 | 0.22425 | 0.14275 | 1.78E-06 | 0.000273 | -8.20525 |
| 264 | 0.2265  | 0.13925 | 1.74E-06 | 0.000273 | -8.20509 |
| 266 | 0.22575 | 0.141   | 1.76E-06 | 0.000273 | -8.20517 |
| 268 | 0.22825 | 0.14    | 1.75E-06 | 0.000273 | -8.20512 |
| 270 | 0.23025 | 0.149   | 1.86E-06 | 0.000273 | -8.20554 |
| 272 | 0.2325  | 0.1445  | 1.81E-06 | 0.000273 | -8.20533 |
| 274 | 0.2335  | 0.15625 | 1.95E-06 | 0.000273 | -8.20587 |
| 276 | 0.2355  | 0.14775 | 1.85E-06 | 0.000273 | -8.20548 |
| 278 | 0.237   | 0.15825 | 1.98E-06 | 0.000273 | -8.20596 |
| 280 | 0.23925 | 0.156   | 1.95E-06 | 0.000273 | -8.20586 |
| 282 | 0.242   | 0.161   | 2.01E-06 | 0.000273 | -8.20608 |
| 284 | 0.24175 | 0.16975 | 2.12E-06 | 0.000273 | -8.20649 |
| 286 | 0.24275 | 0.1615  | 2.02E-06 | 0.000273 | -8.20611 |

|     |         |         |          |          |          |
|-----|---------|---------|----------|----------|----------|
| 288 | 0.2455  | 0.16175 | 2.02E-06 | 0.000273 | -8.20612 |
| 290 | 0.24725 | 0.174   | 2.18E-06 | 0.000273 | -8.20668 |
| 292 | 0.24875 | 0.165   | 2.06E-06 | 0.000273 | -8.20627 |
| 294 | 0.249   | 0.17    | 2.13E-06 | 0.000273 | -8.2065  |
| 296 | 0.25275 | 0.164   | 2.05E-06 | 0.000273 | -8.20622 |
| 298 | 0.2545  | 0.17925 | 2.24E-06 | 0.000273 | -8.20692 |

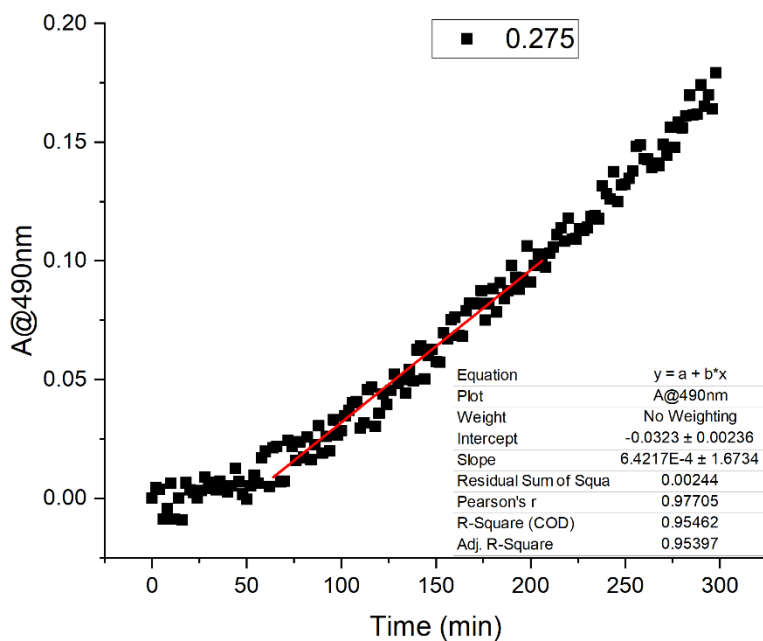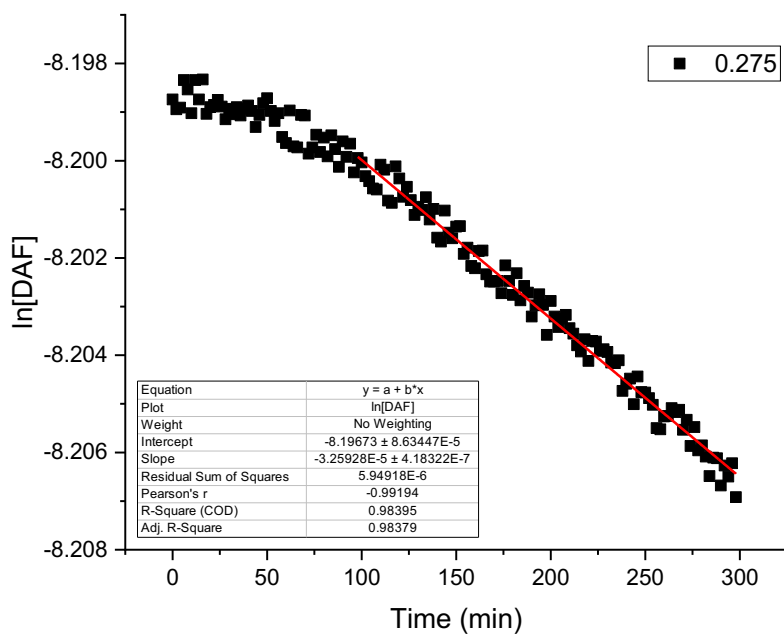

## 0.300 mM DAF

| Time (min) | A@490nm minus BK | set to 0 | [FLU] (M) | [DAF] (M) | ln[DAF]  |
|------------|------------------|----------|-----------|-----------|----------|
| 0          | 0.0585           | 0        | 0         | 0.0003    | -8.11173 |
| 2          | 0.06225          | 0.00925  | 1.16E-07  | 0.0003    | -8.11211 |
| 4          | 0.0635           | 0.00875  | 1.09E-07  | 0.0003    | -8.11209 |
| 6          | 0.062            | 0.0095   | 1.19E-07  | 0.0003    | -8.11212 |
| 8          | 0.062            | 0.00875  | 1.09E-07  | 0.0003    | -8.11209 |
| 10         | 0.06275          | 0.00625  | 7.81E-08  | 0.0003    | -8.11199 |
| 12         | 0.06575          | 0.01175  | 1.47E-07  | 0.0003    | -8.11222 |
| 14         | 0.065            | 0.0105   | 1.31E-07  | 0.0003    | -8.11217 |
| 16         | 0.06525          | 0.008    | 1E-07     | 0.0003    | -8.11206 |
| 18         | 0.0665           | 0.0055   | 6.88E-08  | 0.0003    | -8.11196 |
| 20         | 0.066            | 0.00325  | 4.06E-08  | 0.0003    | -8.11186 |
| 22         | 0.06725          | 0.0055   | 6.88E-08  | 0.0003    | -8.11196 |
| 24         | 0.0675           | 0.00475  | 5.94E-08  | 0.0003    | -8.11193 |
| 26         | 0.06975          | 0.005    | 6.25E-08  | 0.0003    | -8.11194 |
| 28         | 0.07125          | 0.00875  | 1.09E-07  | 0.0003    | -8.11209 |
| 30         | 0.0715           | 0.00875  | 1.09E-07  | 0.0003    | -8.11209 |
| 32         | 0.07075          | 0.00625  | 7.81E-08  | 0.0003    | -8.11199 |
| 34         | 0.072            | 0.00975  | 1.22E-07  | 0.0003    | -8.11213 |
| 36         | 0.07225          | 0.01025  | 1.28E-07  | 0.0003    | -8.11216 |
| 38         | 0.073            | 0.0105   | 1.31E-07  | 0.0003    | -8.11217 |
| 40         | 0.07375          | 0.0115   | 1.44E-07  | 0.0003    | -8.11221 |
| 42         | 0.07625          | 0.0115   | 1.44E-07  | 0.0003    | -8.11221 |
| 44         | 0.0765           | 0.0135   | 1.69E-07  | 0.0003    | -8.11229 |
| 46         | 0.077            | 0.012    | 1.5E-07   | 0.0003    | -8.11223 |
| 48         | 0.07825          | 0.016    | 2E-07     | 0.0003    | -8.11239 |
| 50         | 0.07825          | 0.01075  | 1.34E-07  | 0.0003    | -8.11218 |
| 52         | 0.078            | 0.01775  | 2.22E-07  | 0.0003    | -8.11247 |
| 54         | 0.08025          | 0.01475  | 1.84E-07  | 0.0003    | -8.11234 |
| 56         | 0.08075          | 0.019    | 2.38E-07  | 0.0003    | -8.11252 |
| 58         | 0.08325          | 0.0205   | 2.56E-07  | 0.0003    | -8.11258 |
| 60         | 0.082            | 0.01925  | 2.41E-07  | 0.0003    | -8.11253 |
| 62         | 0.085            | 0.02325  | 2.91E-07  | 0.0003    | -8.1127  |
| 64         | 0.0865           | 0.02125  | 2.66E-07  | 0.0003    | -8.11261 |
| 66         | 0.08725          | 0.02275  | 2.84E-07  | 0.0003    | -8.11268 |
| 68         | 0.08775          | 0.02275  | 2.84E-07  | 0.0003    | -8.11268 |
| 70         | 0.08875          | 0.0265   | 3.31E-07  | 0.0003    | -8.11283 |
| 72         | 0.09             | 0.0265   | 3.31E-07  | 0.0003    | -8.11283 |
| 74         | 0.09175          | 0.02925  | 3.66E-07  | 0.0003    | -8.11295 |
| 76         | 0.0915           | 0.0255   | 3.19E-07  | 0.0003    | -8.11279 |
| 78         | 0.093            | 0.03075  | 3.84E-07  | 0.0003    | -8.11301 |
| 80         | 0.094            | 0.0305   | 3.81E-07  | 0.0003    | -8.113   |
| 82         | 0.097            | 0.03425  | 4.28E-07  | 0.0003    | -8.11316 |
| 84         | 0.09475          | 0.02875  | 3.59E-07  | 0.0003    | -8.11293 |
| 86         | 0.09575          | 0.03175  | 3.97E-07  | 0.0003    | -8.11305 |

|     |         |         |          |          |          |
|-----|---------|---------|----------|----------|----------|
| 88  | 0.098   | 0.03475 | 4.34E-07 | 0.0003   | -8.11318 |
| 90  | 0.09875 | 0.0345  | 4.31E-07 | 0.0003   | -8.11317 |
| 92  | 0.101   | 0.03725 | 4.66E-07 | 0.0003   | -8.11328 |
| 94  | 0.10225 | 0.0375  | 4.69E-07 | 0.0003   | -8.11329 |
| 96  | 0.10425 | 0.041   | 5.13E-07 | 0.000299 | -8.11344 |
| 98  | 0.10375 | 0.03975 | 4.97E-07 | 0.0003   | -8.11339 |
| 100 | 0.1045  | 0.04125 | 5.16E-07 | 0.000299 | -8.11345 |
| 102 | 0.1075  | 0.04325 | 5.41E-07 | 0.000299 | -8.11353 |
| 104 | 0.10925 | 0.04575 | 5.72E-07 | 0.000299 | -8.11364 |
| 106 | 0.10925 | 0.046   | 5.75E-07 | 0.000299 | -8.11365 |
| 108 | 0.1115  | 0.0485  | 6.06E-07 | 0.000299 | -8.11375 |
| 110 | 0.11175 | 0.0465  | 5.81E-07 | 0.000299 | -8.11367 |
| 112 | 0.114   | 0.0505  | 6.31E-07 | 0.000299 | -8.11383 |
| 114 | 0.1155  | 0.051   | 6.38E-07 | 0.000299 | -8.11386 |
| 116 | 0.116   | 0.0525  | 6.56E-07 | 0.000299 | -8.11392 |
| 118 | 0.1175  | 0.05325 | 6.66E-07 | 0.000299 | -8.11395 |
| 120 | 0.1195  | 0.0555  | 6.94E-07 | 0.000299 | -8.11404 |
| 122 | 0.121   | 0.0565  | 7.06E-07 | 0.000299 | -8.11409 |
| 124 | 0.12075 | 0.05775 | 7.22E-07 | 0.000299 | -8.11414 |
| 126 | 0.12325 | 0.0585  | 7.31E-07 | 0.000299 | -8.11417 |
| 128 | 0.12475 | 0.06075 | 7.59E-07 | 0.000299 | -8.11426 |
| 130 | 0.12675 | 0.0615  | 7.69E-07 | 0.000299 | -8.11429 |
| 132 | 0.1275  | 0.063   | 7.88E-07 | 0.000299 | -8.11436 |
| 134 | 0.1295  | 0.06525 | 8.16E-07 | 0.000299 | -8.11445 |
| 136 | 0.13    | 0.0655  | 8.19E-07 | 0.000299 | -8.11446 |
| 138 | 0.132   | 0.072   | 9E-07    | 0.000299 | -8.11473 |
| 140 | 0.13225 | 0.0615  | 7.69E-07 | 0.000299 | -8.11429 |
| 142 | 0.13475 | 0.07075 | 8.84E-07 | 0.000299 | -8.11468 |
| 144 | 0.1365  | 0.07125 | 8.91E-07 | 0.000299 | -8.1147  |
| 146 | 0.13675 | 0.0715  | 8.94E-07 | 0.000299 | -8.11471 |
| 148 | 0.1395  | 0.0735  | 9.19E-07 | 0.000299 | -8.1148  |
| 150 | 0.1395  | 0.0755  | 9.44E-07 | 0.000299 | -8.11488 |
| 152 | 0.1425  | 0.07825 | 9.78E-07 | 0.000299 | -8.11499 |
| 154 | 0.1435  | 0.0785  | 9.81E-07 | 0.000299 | -8.115   |
| 156 | 0.14475 | 0.08075 | 1.01E-06 | 0.000299 | -8.1151  |
| 158 | 0.14625 | 0.0815  | 1.02E-06 | 0.000299 | -8.11513 |
| 160 | 0.14725 | 0.082   | 1.03E-06 | 0.000299 | -8.11515 |
| 162 | 0.15025 | 0.084   | 1.05E-06 | 0.000299 | -8.11523 |
| 164 | 0.15275 | 0.0855  | 1.07E-06 | 0.000299 | -8.1153  |
| 166 | 0.15225 | 0.087   | 1.09E-06 | 0.000299 | -8.11536 |
| 168 | 0.15425 | 0.089   | 1.11E-06 | 0.000299 | -8.11544 |
| 170 | 0.15575 | 0.0915  | 1.14E-06 | 0.000299 | -8.11555 |
| 172 | 0.15675 | 0.091   | 1.14E-06 | 0.000299 | -8.11553 |
| 174 | 0.15825 | 0.093   | 1.16E-06 | 0.000299 | -8.11561 |
| 176 | 0.15925 | 0.09275 | 1.16E-06 | 0.000299 | -8.1156  |
| 178 | 0.16075 | 0.09325 | 1.17E-06 | 0.000299 | -8.11562 |

|     |         |         |          |          |          |
|-----|---------|---------|----------|----------|----------|
| 180 | 0.161   | 0.096   | 1.2E-06  | 0.000299 | -8.11574 |
| 182 | 0.163   | 0.097   | 1.21E-06 | 0.000299 | -8.11578 |
| 184 | 0.1665  | 0.1005  | 1.26E-06 | 0.000299 | -8.11592 |
| 186 | 0.1685  | 0.10375 | 1.3E-06  | 0.000299 | -8.11606 |
| 188 | 0.1705  | 0.1055  | 1.32E-06 | 0.000299 | -8.11613 |
| 190 | 0.1705  | 0.10625 | 1.33E-06 | 0.000299 | -8.11616 |
| 192 | 0.17325 | 0.10825 | 1.35E-06 | 0.000299 | -8.11625 |
| 194 | 0.174   | 0.1085  | 1.36E-06 | 0.000299 | -8.11626 |
| 196 | 0.176   | 0.108   | 1.35E-06 | 0.000299 | -8.11624 |
| 198 | 0.1775  | 0.1025  | 1.28E-06 | 0.000299 | -8.11601 |
| 200 | 0.17975 | 0.11425 | 1.43E-06 | 0.000299 | -8.1165  |
| 202 | 0.1815  | 0.11675 | 1.46E-06 | 0.000299 | -8.1166  |
| 204 | 0.1835  | 0.1175  | 1.47E-06 | 0.000299 | -8.11664 |
| 206 | 0.18425 | 0.119   | 1.49E-06 | 0.000299 | -8.1167  |
| 208 | 0.1855  | 0.1205  | 1.51E-06 | 0.000298 | -8.11676 |
| 210 | 0.18725 | 0.12275 | 1.53E-06 | 0.000298 | -8.11686 |
| 212 | 0.188   | 0.122   | 1.53E-06 | 0.000298 | -8.11682 |
| 214 | 0.19    | 0.1245  | 1.56E-06 | 0.000298 | -8.11693 |
| 216 | 0.19125 | 0.1255  | 1.57E-06 | 0.000298 | -8.11697 |
| 218 | 0.19325 | 0.1245  | 1.56E-06 | 0.000298 | -8.11693 |
| 220 | 0.19725 | 0.13    | 1.63E-06 | 0.000298 | -8.11716 |
| 222 | 0.19625 | 0.12875 | 1.61E-06 | 0.000298 | -8.11711 |
| 224 | 0.19825 | 0.133   | 1.66E-06 | 0.000298 | -8.11729 |
| 226 | 0.201   | 0.13375 | 1.67E-06 | 0.000298 | -8.11732 |
| 228 | 0.2025  | 0.1375  | 1.72E-06 | 0.000298 | -8.11747 |
| 230 | 0.2025  | 0.13675 | 1.71E-06 | 0.000298 | -8.11744 |
| 232 | 0.20475 | 0.13825 | 1.73E-06 | 0.000298 | -8.11751 |
| 234 | 0.20475 | 0.1385  | 1.73E-06 | 0.000298 | -8.11752 |
| 236 | 0.20875 | 0.1435  | 1.79E-06 | 0.000298 | -8.11773 |
| 238 | 0.2095  | 0.14225 | 1.78E-06 | 0.000298 | -8.11767 |
| 240 | 0.21125 | 0.1435  | 1.79E-06 | 0.000298 | -8.11773 |
| 242 | 0.2125  | 0.14625 | 1.83E-06 | 0.000298 | -8.11784 |
| 244 | 0.216   | 0.14925 | 1.87E-06 | 0.000298 | -8.11797 |
| 246 | 0.217   | 0.15125 | 1.89E-06 | 0.000298 | -8.11805 |
| 248 | 0.21925 | 0.15275 | 1.91E-06 | 0.000298 | -8.11811 |
| 250 | 0.22125 | 0.1545  | 1.93E-06 | 0.000298 | -8.11819 |
| 252 | 0.22225 | 0.1555  | 1.94E-06 | 0.000298 | -8.11823 |
| 254 | 0.224   | 0.157   | 1.96E-06 | 0.000298 | -8.11829 |
| 256 | 0.226   | 0.15775 | 1.97E-06 | 0.000298 | -8.11832 |
| 258 | 0.22725 | 0.1595  | 1.99E-06 | 0.000298 | -8.1184  |
| 260 | 0.22825 | 0.16075 | 2.01E-06 | 0.000298 | -8.11845 |
| 262 | 0.2295  | 0.161   | 2.01E-06 | 0.000298 | -8.11846 |
| 264 | 0.233   | 0.16475 | 2.06E-06 | 0.000298 | -8.11862 |
| 266 | 0.23325 | 0.16625 | 2.08E-06 | 0.000298 | -8.11868 |
| 268 | 0.2345  | 0.16675 | 2.08E-06 | 0.000298 | -8.1187  |
| 270 | 0.23675 | 0.1685  | 2.11E-06 | 0.000298 | -8.11877 |

|     |         |         |          |          |          |
|-----|---------|---------|----------|----------|----------|
| 272 | 0.2395  | 0.17025 | 2.13E-06 | 0.000298 | -8.11885 |
| 274 | 0.24125 | 0.17275 | 2.16E-06 | 0.000298 | -8.11895 |
| 276 | 0.24375 | 0.17525 | 2.19E-06 | 0.000298 | -8.11906 |
| 278 | 0.2445  | 0.1765  | 2.21E-06 | 0.000298 | -8.11911 |
| 280 | 0.2465  | 0.17775 | 2.22E-06 | 0.000298 | -8.11916 |
| 282 | 0.2485  | 0.1795  | 2.24E-06 | 0.000298 | -8.11924 |
| 284 | 0.249   | 0.18125 | 2.27E-06 | 0.000298 | -8.11931 |
| 286 | 0.251   | 0.18025 | 2.25E-06 | 0.000298 | -8.11927 |
| 288 | 0.25375 | 0.18425 | 2.3E-06  | 0.000298 | -8.11943 |
| 290 | 0.25475 | 0.186   | 2.33E-06 | 0.000298 | -8.11951 |
| 292 | 0.257   | 0.1885  | 2.36E-06 | 0.000298 | -8.11961 |
| 294 | 0.258   | 0.189   | 2.36E-06 | 0.000298 | -8.11963 |
| 296 | 0.26025 | 0.19075 | 2.38E-06 | 0.000298 | -8.11971 |
| 298 | 0.26125 | 0.19125 | 2.39E-06 | 0.000298 | -8.11973 |

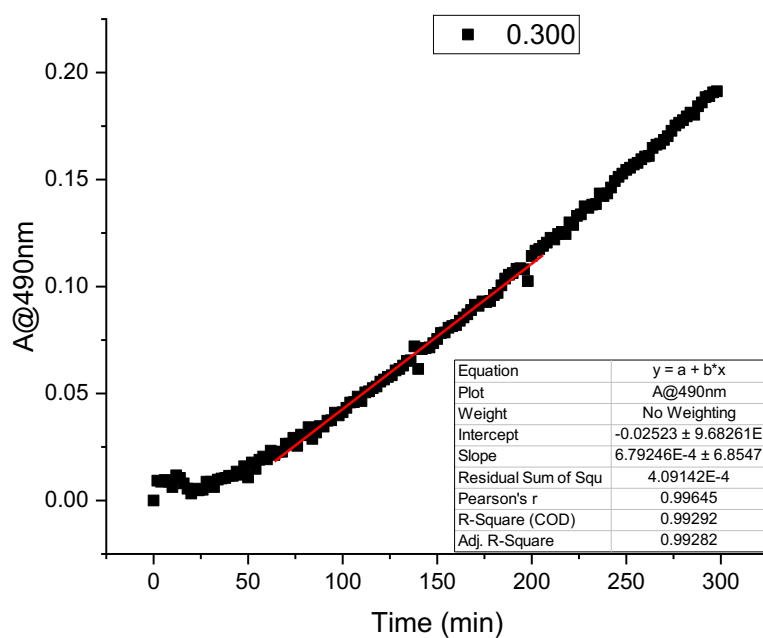

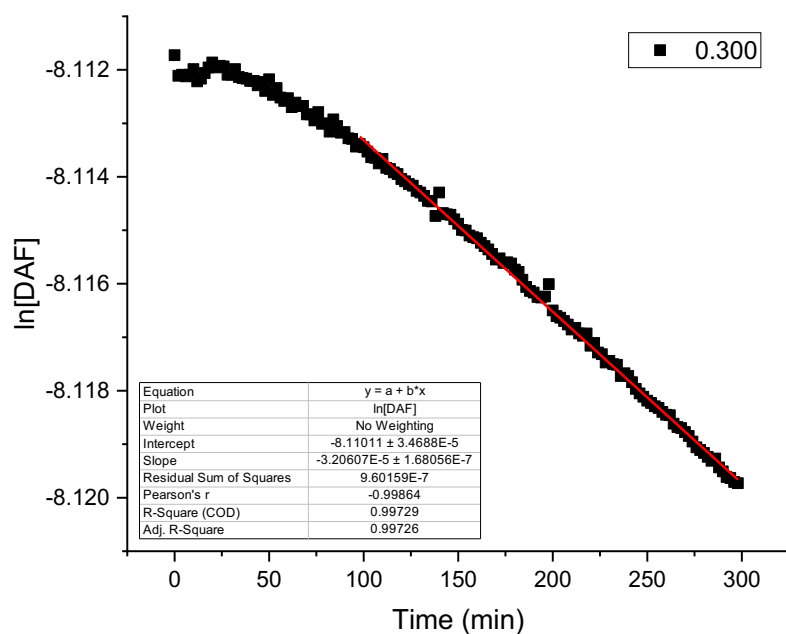

Catalysis of **DAF** to **FLU** with concentrations of **CoH<sup>w</sup>Cl** between 0.05-0.150 mM  
 ([**DAF**]=0.065 mM , 50 mM PBS buffer pH 7)

**0.05 mM CoHwCl, 50 mM PBS pH 7, [DAF]=0.065 mM**

| Time (min) | A@490nm | A@490nm minus BK | set to 0 | [FLU] (M) | [DAF] (M) | ln[DAF]  |
|------------|---------|------------------|----------|-----------|-----------|----------|
| 0          | 0.021   | 0.01025          | 0        | 0         | 0.000065  | -9.64112 |
| 2          | 0.01875 | 0.0095           | -0.00075 | -6.3E-09  | 6.5E-05   | -9.64103 |
| 4          | 0.019   | 0.011            | 0.00075  | 1.25E-08  | 6.5E-05   | -9.64132 |
| 6          | 0.02    | 0.01225          | 0.002    | 3.13E-08  | 6.5E-05   | -9.6416  |
| 8          | 0.0195  | 0.01175          | 0.0015   | 3.44E-08  | 6.5E-05   | -9.64165 |
| 10         | 0.02    | 0.00825          | -0.002   | -2.5E-08  | 6.5E-05   | -9.64074 |
| 12         | 0.0195  | 0.01475          | 0.0045   | 5.94E-08  | 6.49E-05  | -9.64204 |
| 14         | 0.02075 | 0.015763         | 0.005513 | 6.89E-08  | 6.49E-05  | -9.64218 |
| 16         | 0.01925 | 0.01375          | 0.0035   | 4.69E-08  | 6.5E-05   | -9.64184 |
| 18         | 0.02025 | 0.01575          | 0.0055   | 6.88E-08  | 6.49E-05  | -9.64218 |
| 20         | 0.0195  | 0.016            | 0.00575  | 8.44E-08  | 6.49E-05  | -9.64242 |
| 22         | 0.02025 | 0.01525          | 0.005    | 6.56E-08  | 6.49E-05  | -9.64213 |
| 24         | 0.02    | 0.015            | 0.00475  | 6.56E-08  | 6.49E-05  | -9.64213 |
| 26         | 0.02125 | 0.01625          | 0.006    | 7.19E-08  | 6.49E-05  | -9.64223 |
| 28         | 0.02225 | 0.01675          | 0.0065   | 8.13E-08  | 6.49E-05  | -9.64237 |
| 30         | 0.02125 | 0.01575          | 0.0055   | 8.13E-08  | 6.49E-05  | -9.64237 |
| 32         | 0.02175 | 0.0165           | 0.00625  | 8.75E-08  | 6.49E-05  | -9.64247 |
| 34         | 0.02225 | 0.01725          | 0.007    | 9.69E-08  | 6.49E-05  | -9.64261 |
| 36         | 0.023   | 0.01725          | 0.007    | 8.75E-08  | 6.49E-05  | -9.64247 |
| 38         | 0.0225  | 0.01725          | 0.007    | 9.69E-08  | 6.49E-05  | -9.64261 |

|     |         |         |         |          |          |          |
|-----|---------|---------|---------|----------|----------|----------|
| 40  | 0.024   | 0.018   | 0.00775 | 9.06E-08 | 6.49E-05 | -9.64252 |
| 42  | 0.024   | 0.018   | 0.00775 | 1E-07    | 6.49E-05 | -9.64266 |
| 44  | 0.024   | 0.0185  | 0.00825 | 1.13E-07 | 6.49E-05 | -9.64286 |
| 46  | 0.02475 | 0.0195  | 0.00925 | 1.16E-07 | 6.49E-05 | -9.6429  |
| 48  | 0.02575 | 0.01975 | 0.0095  | 1.25E-07 | 6.49E-05 | -9.64305 |
| 50  | 0.0255  | 0.0205  | 0.01025 | 1.31E-07 | 6.49E-05 | -9.64314 |
| 52  | 0.0265  | 0.0205  | 0.01025 | 1.34E-07 | 6.49E-05 | -9.64319 |
| 54  | 0.026   | 0.02025 | 0.01    | 1.34E-07 | 6.49E-05 | -9.64319 |
| 56  | 0.026   | 0.02    | 0.00975 | 1.38E-07 | 6.49E-05 | -9.64324 |
| 58  | 0.02675 | 0.01925 | 0.009   | 1.28E-07 | 6.49E-05 | -9.6431  |
| 60  | 0.027   | 0.021   | 0.01075 | 1.53E-07 | 6.48E-05 | -9.64348 |
| 62  | 0.02675 | 0.02075 | 0.0105  | 1.5E-07  | 6.49E-05 | -9.64343 |
| 64  | 0.02725 | 0.0215  | 0.01125 | 1.63E-07 | 6.48E-05 | -9.64363 |
| 66  | 0.0285  | 0.023   | 0.01275 | 1.66E-07 | 6.48E-05 | -9.64367 |
| 68  | 0.028   | 0.02225 | 0.012   | 1.75E-07 | 6.48E-05 | -9.64382 |
| 70  | 0.0295  | 0.02325 | 0.013   | 1.84E-07 | 6.48E-05 | -9.64396 |
| 72  | 0.029   | 0.0235  | 0.01325 | 1.94E-07 | 6.48E-05 | -9.64411 |
| 74  | 0.03    | 0.0235  | 0.01325 | 1.97E-07 | 6.48E-05 | -9.64416 |
| 76  | 0.0325  | 0.0265  | 0.01625 | 2E-07    | 6.48E-05 | -9.6442  |
| 78  | 0.03225 | 0.026   | 0.01575 | 2.09E-07 | 6.48E-05 | -9.64435 |
| 80  | 0.03175 | 0.026   | 0.01575 | 2.09E-07 | 6.48E-05 | -9.64435 |
| 82  | 0.03275 | 0.0265  | 0.01625 | 2.22E-07 | 6.48E-05 | -9.64454 |
| 84  | 0.03325 | 0.02725 | 0.017   | 2.31E-07 | 6.48E-05 | -9.64469 |
| 86  | 0.0335  | 0.02775 | 0.0175  | 2.34E-07 | 6.48E-05 | -9.64474 |
| 88  | 0.03325 | 0.0285  | 0.01825 | 2.5E-07  | 6.48E-05 | -9.64498 |
| 90  | 0.03475 | 0.02925 | 0.019   | 2.53E-07 | 6.47E-05 | -9.64503 |
| 92  | 0.0355  | 0.0295  | 0.01925 | 2.56E-07 | 6.47E-05 | -9.64507 |
| 94  | 0.0355  | 0.02975 | 0.0195  | 2.75E-07 | 6.47E-05 | -9.64536 |
| 96  | 0.036   | 0.0305  | 0.02025 | 2.78E-07 | 6.47E-05 | -9.64541 |
| 98  | 0.03725 | 0.03175 | 0.0215  | 2.91E-07 | 6.47E-05 | -9.6456  |
| 100 | 0.0375  | 0.03175 | 0.0215  | 2.91E-07 | 6.47E-05 | -9.6456  |
| 102 | 0.0375  | 0.03175 | 0.0215  | 3E-07    | 6.47E-05 | -9.64575 |
| 104 | 0.03825 | 0.03175 | 0.0215  | 3.06E-07 | 6.47E-05 | -9.64585 |
| 106 | 0.04175 | 0.037   | 0.02675 | 3.25E-07 | 6.47E-05 | -9.64614 |
| 108 | 0.03975 | 0.03425 | 0.024   | 3.31E-07 | 6.47E-05 | -9.64623 |
| 110 | 0.0425  | 0.03725 | 0.027   | 3.38E-07 | 6.47E-05 | -9.64633 |
| 112 | 0.0415  | 0.03525 | 0.025   | 3.41E-07 | 6.47E-05 | -9.64638 |
| 114 | 0.04075 | 0.035   | 0.02475 | 3.41E-07 | 6.47E-05 | -9.64638 |
| 116 | 0.0415  | 0.03725 | 0.027   | 3.78E-07 | 6.46E-05 | -9.64696 |
| 118 | 0.042   | 0.0365  | 0.02625 | 3.72E-07 | 6.46E-05 | -9.64686 |
| 120 | 0.04275 | 0.0375  | 0.02725 | 3.72E-07 | 6.46E-05 | -9.64686 |
| 122 | 0.044   | 0.0375  | 0.02725 | 3.72E-07 | 6.46E-05 | -9.64686 |
| 124 | 0.04475 | 0.03875 | 0.0285  | 3.94E-07 | 6.46E-05 | -9.6472  |
| 126 | 0.04475 | 0.03975 | 0.0295  | 4.03E-07 | 6.46E-05 | -9.64734 |
| 128 | 0.04425 | 0.039   | 0.02875 | 3.94E-07 | 6.46E-05 | -9.6472  |
| 130 | 0.0455  | 0.04    | 0.02975 | 4.09E-07 | 6.46E-05 | -9.64744 |



|     |         |         |         |          |          |          |
|-----|---------|---------|---------|----------|----------|----------|
| 132 | 0.04525 | 0.0405  | 0.03025 | 4.25E-07 | 6.46E-05 | -9.64768 |
| 134 | 0.0455  | 0.04025 | 0.03    | 4.19E-07 | 6.46E-05 | -9.64759 |
| 136 | 0.048   | 0.042   | 0.03175 | 4.44E-07 | 6.46E-05 | -9.64797 |
| 138 | 0.0475  | 0.04175 | 0.0315  | 4.53E-07 | 6.45E-05 | -9.64812 |
| 140 | 0.049   | 0.0435  | 0.03325 | 4.59E-07 | 6.45E-05 | -9.64822 |
| 142 | 0.0485  | 0.043   | 0.03275 | 4.66E-07 | 6.45E-05 | -9.64831 |
| 144 | 0.0505  | 0.04475 | 0.0345  | 4.81E-07 | 6.45E-05 | -9.64855 |
| 146 | 0.05025 | 0.0445  | 0.03425 | 4.78E-07 | 6.45E-05 | -9.64851 |
| 148 | 0.05075 | 0.0445  | 0.03425 | 5E-07    | 6.45E-05 | -9.64885 |
| 150 | 0.05075 | 0.04525 | 0.035   | 4.94E-07 | 6.45E-05 | -9.64875 |
| 152 | 0.05175 | 0.04575 | 0.0355  | 5.03E-07 | 6.45E-05 | -9.64889 |
| 154 | 0.05325 | 0.04725 | 0.037   | 5.13E-07 | 6.45E-05 | -9.64904 |
| 156 | 0.05375 | 0.04775 | 0.0375  | 5.22E-07 | 6.45E-05 | -9.64918 |
| 158 | 0.05475 | 0.0485  | 0.03825 | 5.22E-07 | 6.45E-05 | -9.64918 |
| 160 | 0.05475 | 0.048   | 0.03775 | 5.25E-07 | 6.45E-05 | -9.64923 |
| 162 | 0.056   | 0.04925 | 0.039   | 5.34E-07 | 6.45E-05 | -9.64938 |
| 164 | 0.05525 | 0.049   | 0.03875 | 5.44E-07 | 6.45E-05 | -9.64952 |
| 166 | 0.0575  | 0.051   | 0.04075 | 5.53E-07 | 6.44E-05 | -9.64967 |
| 168 | 0.0575  | 0.05025 | 0.04    | 5.63E-07 | 6.44E-05 | -9.64981 |
| 170 | 0.058   | 0.051   | 0.04075 | 5.72E-07 | 6.44E-05 | -9.64996 |
| 172 | 0.0585  | 0.052   | 0.04175 | 5.81E-07 | 6.44E-05 | -9.65011 |
| 174 | 0.05925 | 0.0525  | 0.04225 | 5.88E-07 | 6.44E-05 | -9.6502  |
| 176 | 0.0595  | 0.05275 | 0.0425  | 5.94E-07 | 6.44E-05 | -9.6503  |
| 178 | 0.0605  | 0.05375 | 0.0435  | 6.09E-07 | 6.44E-05 | -9.65054 |
| 180 | 0.0625  | 0.057   | 0.04675 | 6.38E-07 | 6.44E-05 | -9.65098 |
| 182 | 0.06225 | 0.05575 | 0.0455  | 6.38E-07 | 6.44E-05 | -9.65098 |
| 184 | 0.06175 | 0.0555  | 0.04525 | 6.28E-07 | 6.44E-05 | -9.65083 |
| 186 | 0.064   | 0.05775 | 0.0475  | 6.56E-07 | 6.43E-05 | -9.65127 |
| 188 | 0.063   | 0.0565  | 0.04625 | 6.47E-07 | 6.44E-05 | -9.65113 |
| 190 | 0.0645  | 0.05825 | 0.048   | 6.72E-07 | 6.43E-05 | -9.65151 |
| 192 | 0.06425 | 0.0585  | 0.04825 | 6.75E-07 | 6.43E-05 | -9.65156 |
| 194 | 0.0655  | 0.059   | 0.04875 | 6.84E-07 | 6.43E-05 | -9.65171 |
| 196 | 0.06625 | 0.0595  | 0.04925 | 6.88E-07 | 6.43E-05 | -9.65176 |
| 198 | 0.071   | 0.06375 | 0.0535  | 6.91E-07 | 6.43E-05 | -9.65181 |
| 200 | 0.0675  | 0.0605  | 0.05025 | 7.03E-07 | 6.43E-05 | -9.652   |
| 202 | 0.06775 | 0.06125 | 0.051   | 7.22E-07 | 6.43E-05 | -9.65229 |
| 204 | 0.06825 | 0.0615  | 0.05125 | 7.19E-07 | 6.43E-05 | -9.65224 |
| 206 | 0.069   | 0.0625  | 0.05225 | 7.31E-07 | 6.43E-05 | -9.65244 |
| 208 | 0.06975 | 0.063   | 0.05275 | 7.41E-07 | 6.43E-05 | -9.65258 |
| 210 | 0.07    | 0.064   | 0.05375 | 7.44E-07 | 6.43E-05 | -9.65263 |
| 212 | 0.07025 | 0.0635  | 0.05325 | 7.53E-07 | 6.42E-05 | -9.65278 |
| 214 | 0.07025 | 0.06475 | 0.0545  | 7.63E-07 | 6.42E-05 | -9.65292 |
| 216 | 0.07225 | 0.065   | 0.05475 | 7.75E-07 | 6.42E-05 | -9.65312 |
| 218 | 0.0725  | 0.06575 | 0.0555  | 7.78E-07 | 6.42E-05 | -9.65317 |
| 220 | 0.07225 | 0.06575 | 0.0555  | 7.94E-07 | 6.42E-05 | -9.65341 |
| 222 | 0.0745  | 0.06775 | 0.0575  | 8E-07    | 6.42E-05 | -9.65351 |

|     |         |         |         |          |          |          |
|-----|---------|---------|---------|----------|----------|----------|
| 224 | 0.0745  | 0.06775 | 0.0575  | 8.09E-07 | 6.42E-05 | -9.65365 |
| 226 | 0.07525 | 0.068   | 0.05775 | 8.13E-07 | 6.42E-05 | -9.6537  |
| 228 | 0.07625 | 0.06925 | 0.059   | 8.28E-07 | 6.42E-05 | -9.65395 |
| 230 | 0.07575 | 0.06875 | 0.0585  | 8.25E-07 | 6.42E-05 | -9.6539  |
| 232 | 0.07575 | 0.06925 | 0.059   | 8.34E-07 | 6.42E-05 | -9.65404 |
| 234 | 0.0775  | 0.0705  | 0.06025 | 8.44E-07 | 6.42E-05 | -9.65419 |
| 236 | 0.07825 | 0.0705  | 0.06025 | 8.5E-07  | 6.42E-05 | -9.65429 |
| 238 | 0.0785  | 0.0705  | 0.06025 | 8.5E-07  | 6.42E-05 | -9.65429 |
| 240 | 0.07925 | 0.072   | 0.06175 | 8.66E-07 | 6.41E-05 | -9.65453 |
| 242 | 0.0805  | 0.07275 | 0.0625  | 8.72E-07 | 6.41E-05 | -9.65463 |
| 244 | 0.08075 | 0.07275 | 0.0625  | 8.94E-07 | 6.41E-05 | -9.65497 |
| 246 | 0.0825  | 0.07425 | 0.064   | 8.91E-07 | 6.41E-05 | -9.65492 |
| 248 | 0.0805  | 0.07375 | 0.0635  | 8.94E-07 | 6.41E-05 | -9.65497 |
| 250 | 0.0835  | 0.07525 | 0.065   | 9.06E-07 | 6.41E-05 | -9.65516 |
| 252 | 0.0835  | 0.07525 | 0.065   | 9.13E-07 | 6.41E-05 | -9.65526 |
| 254 | 0.084   | 0.076   | 0.06575 | 9.19E-07 | 6.41E-05 | -9.65536 |
| 256 | 0.085   | 0.07725 | 0.067   | 9.5E-07  | 6.41E-05 | -9.65585 |
| 258 | 0.0855  | 0.07825 | 0.068   | 9.5E-07  | 6.41E-05 | -9.65585 |
| 260 | 0.086   | 0.078   | 0.06775 | 9.5E-07  | 6.41E-05 | -9.65585 |
| 262 | 0.08625 | 0.07825 | 0.068   | 9.53E-07 | 6.4E-05  | -9.6559  |
| 264 | 0.0875  | 0.0795  | 0.06925 | 9.56E-07 | 6.4E-05  | -9.65594 |
| 266 | 0.0875  | 0.07925 | 0.069   | 9.78E-07 | 6.4E-05  | -9.65629 |
| 268 | 0.0885  | 0.08    | 0.06975 | 9.75E-07 | 6.4E-05  | -9.65624 |
| 270 | 0.08975 | 0.08175 | 0.0715  | 9.91E-07 | 6.4E-05  | -9.65648 |
| 272 | 0.0905  | 0.0825  | 0.07225 | 1.01E-06 | 6.4E-05  | -9.65677 |
| 274 | 0.09125 | 0.0815  | 0.07125 | 9.97E-07 | 6.4E-05  | -9.65658 |
| 276 | 0.092   | 0.0835  | 0.07325 | 1.03E-06 | 6.4E-05  | -9.65702 |
| 278 | 0.09275 | 0.08425 | 0.074   | 1.02E-06 | 6.4E-05  | -9.65697 |
| 280 | 0.09375 | 0.085   | 0.07475 | 1.03E-06 | 6.4E-05  | -9.65712 |
| 282 | 0.09325 | 0.08475 | 0.0745  | 1.04E-06 | 6.4E-05  | -9.65731 |
| 284 | 0.095   | 0.0865  | 0.07625 | 1.05E-06 | 6.39E-05 | -9.65746 |
| 286 | 0.095   | 0.08675 | 0.0765  | 1.07E-06 | 6.39E-05 | -9.65765 |
| 288 | 0.09625 | 0.0875  | 0.07725 | 1.06E-06 | 6.39E-05 | -9.6576  |
| 290 | 0.0965  | 0.087   | 0.07675 | 1.06E-06 | 6.39E-05 | -9.65756 |
| 292 | 0.0975  | 0.08925 | 0.079   | 1.1E-06  | 6.39E-05 | -9.65814 |
| 294 | 0.09825 | 0.08975 | 0.0795  | 1.1E-06  | 6.39E-05 | -9.65819 |
| 296 | 0.0985  | 0.08825 | 0.078   | 1.09E-06 | 6.39E-05 | -9.658   |
| 298 | 0.0995  | 0.09075 | 0.0805  | 1.12E-06 | 6.39E-05 | -9.65848 |

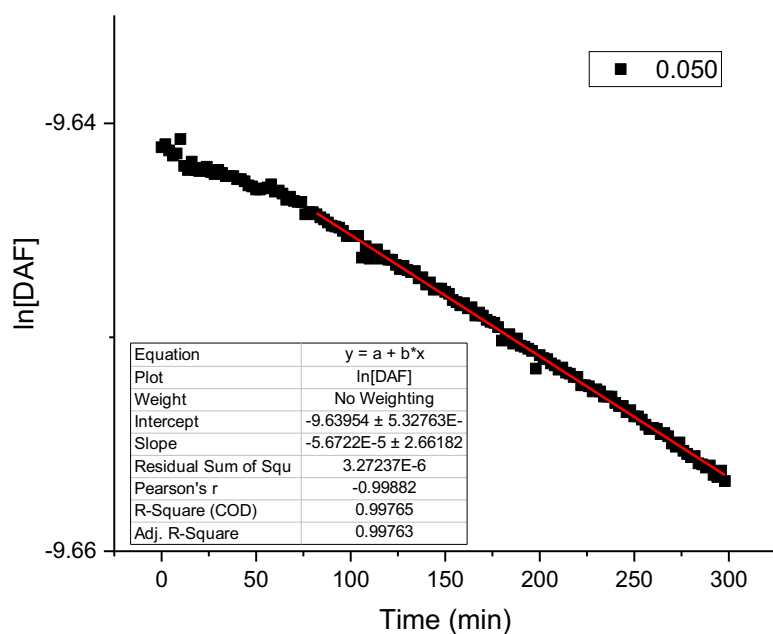

**0.065 mM CoHwCl, 50 mM PBS pH 7, [DAF]=0.065 mM**

| Time (min) | A@490nm | A@490nm minus BK | set to zero | [FLU] (M) | [DAF] (M) | ln[DAF]  |
|------------|---------|------------------|-------------|-----------|-----------|----------|
| 0          | 0.0225  | 0.01175          | 0           | 0         | 0.000065  | -9.64112 |
| 2          | 0.0205  | 0.01125          | -0.0005     | -6.3E-09  | 6.5E-05   | -9.64103 |
| 4          | 0.02075 | 0.01275          | 0.001       | 1.25E-08  | 6.5E-05   | -9.64132 |
| 6          | 0.022   | 0.01425          | 0.0025      | 3.13E-08  | 6.5E-05   | -9.6416  |
| 8          | 0.02225 | 0.0145           | 0.00275     | 3.44E-08  | 6.5E-05   | -9.64165 |
| 10         | 0.0215  | 0.00975          | -0.002      | -2.5E-08  | 6.5E-05   | -9.64074 |
| 12         | 0.02125 | 0.0165           | 0.00475     | 5.94E-08  | 6.49E-05  | -9.64204 |
| 14         | 0.02225 | 0.017263         | 0.005513    | 6.89E-08  | 6.49E-05  | -9.64218 |
| 16         | 0.021   | 0.0155           | 0.00375     | 4.69E-08  | 6.5E-05   | -9.64184 |
| 18         | 0.02175 | 0.01725          | 0.0055      | 6.88E-08  | 6.49E-05  | -9.64218 |
| 20         | 0.022   | 0.0185           | 0.00675     | 8.44E-08  | 6.49E-05  | -9.64242 |
| 22         | 0.022   | 0.017            | 0.00525     | 6.56E-08  | 6.49E-05  | -9.64213 |
| 24         | 0.022   | 0.017            | 0.00525     | 6.56E-08  | 6.49E-05  | -9.64213 |
| 26         | 0.0225  | 0.0175           | 0.00575     | 7.19E-08  | 6.49E-05  | -9.64223 |
| 28         | 0.02375 | 0.01825          | 0.0065      | 8.13E-08  | 6.49E-05  | -9.64237 |
| 30         | 0.02375 | 0.01825          | 0.0065      | 8.13E-08  | 6.49E-05  | -9.64237 |
| 32         | 0.024   | 0.01875          | 0.007       | 8.75E-08  | 6.49E-05  | -9.64247 |
| 34         | 0.0245  | 0.0195           | 0.00775     | 9.69E-08  | 6.49E-05  | -9.64261 |
| 36         | 0.0245  | 0.01875          | 0.007       | 8.75E-08  | 6.49E-05  | -9.64247 |
| 38         | 0.02475 | 0.0195           | 0.00775     | 9.69E-08  | 6.49E-05  | -9.64261 |
| 40         | 0.025   | 0.019            | 0.00725     | 9.06E-08  | 6.49E-05  | -9.64252 |
| 42         | 0.02575 | 0.01975          | 0.008       | 1E-07     | 6.49E-05  | -9.64266 |
| 44         | 0.02625 | 0.02075          | 0.009       | 1.13E-07  | 6.49E-05  | -9.64286 |
| 46         | 0.02625 | 0.021            | 0.00925     | 1.16E-07  | 6.49E-05  | -9.6429  |

|     |         |         |         |          |          |          |
|-----|---------|---------|---------|----------|----------|----------|
| 48  | 0.02775 | 0.02175 | 0.01    | 1.25E-07 | 6.49E-05 | -9.64305 |
| 50  | 0.02725 | 0.02225 | 0.0105  | 1.31E-07 | 6.49E-05 | -9.64314 |
| 52  | 0.0285  | 0.0225  | 0.01075 | 1.34E-07 | 6.49E-05 | -9.64319 |
| 54  | 0.02825 | 0.0225  | 0.01075 | 1.34E-07 | 6.49E-05 | -9.64319 |
| 56  | 0.02875 | 0.02275 | 0.011   | 1.38E-07 | 6.49E-05 | -9.64324 |
| 58  | 0.0295  | 0.022   | 0.01025 | 1.28E-07 | 6.49E-05 | -9.6431  |
| 60  | 0.03    | 0.024   | 0.01225 | 1.53E-07 | 6.48E-05 | -9.64348 |
| 62  | 0.02975 | 0.02375 | 0.012   | 1.5E-07  | 6.49E-05 | -9.64343 |
| 64  | 0.0305  | 0.02475 | 0.013   | 1.63E-07 | 6.48E-05 | -9.64363 |
| 66  | 0.0305  | 0.025   | 0.01325 | 1.66E-07 | 6.48E-05 | -9.64367 |
| 68  | 0.0315  | 0.02575 | 0.014   | 1.75E-07 | 6.48E-05 | -9.64382 |
| 70  | 0.03275 | 0.0265  | 0.01475 | 1.84E-07 | 6.48E-05 | -9.64396 |
| 72  | 0.03275 | 0.02725 | 0.0155  | 1.94E-07 | 6.48E-05 | -9.64411 |
| 74  | 0.034   | 0.0275  | 0.01575 | 1.97E-07 | 6.48E-05 | -9.64416 |
| 76  | 0.03375 | 0.02775 | 0.016   | 2E-07    | 6.48E-05 | -9.6442  |
| 78  | 0.03475 | 0.0285  | 0.01675 | 2.09E-07 | 6.48E-05 | -9.64435 |
| 80  | 0.03425 | 0.0285  | 0.01675 | 2.09E-07 | 6.48E-05 | -9.64435 |
| 82  | 0.03575 | 0.0295  | 0.01775 | 2.22E-07 | 6.48E-05 | -9.64454 |
| 84  | 0.03625 | 0.03025 | 0.0185  | 2.31E-07 | 6.48E-05 | -9.64469 |
| 86  | 0.03625 | 0.0305  | 0.01875 | 2.34E-07 | 6.48E-05 | -9.64474 |
| 88  | 0.0365  | 0.03175 | 0.02    | 2.5E-07  | 6.48E-05 | -9.64498 |
| 90  | 0.0375  | 0.032   | 0.02025 | 2.53E-07 | 6.47E-05 | -9.64503 |
| 92  | 0.03825 | 0.03225 | 0.0205  | 2.56E-07 | 6.47E-05 | -9.64507 |
| 94  | 0.0395  | 0.03375 | 0.022   | 2.75E-07 | 6.47E-05 | -9.64536 |
| 96  | 0.0395  | 0.034   | 0.02225 | 2.78E-07 | 6.47E-05 | -9.64541 |
| 98  | 0.0405  | 0.035   | 0.02325 | 2.91E-07 | 6.47E-05 | -9.6456  |
| 100 | 0.04075 | 0.035   | 0.02325 | 2.91E-07 | 6.47E-05 | -9.6456  |
| 102 | 0.0415  | 0.03575 | 0.024   | 3E-07    | 6.47E-05 | -9.64575 |
| 104 | 0.04275 | 0.03625 | 0.0245  | 3.06E-07 | 6.47E-05 | -9.64585 |
| 106 | 0.0425  | 0.03775 | 0.026   | 3.25E-07 | 6.47E-05 | -9.64614 |
| 108 | 0.04375 | 0.03825 | 0.0265  | 3.31E-07 | 6.47E-05 | -9.64623 |
| 110 | 0.044   | 0.03875 | 0.027   | 3.38E-07 | 6.47E-05 | -9.64633 |
| 112 | 0.04525 | 0.039   | 0.02725 | 3.41E-07 | 6.47E-05 | -9.64638 |
| 114 | 0.04475 | 0.039   | 0.02725 | 3.41E-07 | 6.47E-05 | -9.64638 |
| 116 | 0.04625 | 0.042   | 0.03025 | 3.78E-07 | 6.46E-05 | -9.64696 |
| 118 | 0.047   | 0.0415  | 0.02975 | 3.72E-07 | 6.46E-05 | -9.64686 |
| 120 | 0.04675 | 0.0415  | 0.02975 | 3.72E-07 | 6.46E-05 | -9.64686 |
| 122 | 0.048   | 0.0415  | 0.02975 | 3.72E-07 | 6.46E-05 | -9.64686 |
| 124 | 0.04925 | 0.04325 | 0.0315  | 3.94E-07 | 6.46E-05 | -9.6472  |
| 126 | 0.049   | 0.044   | 0.03225 | 4.03E-07 | 6.46E-05 | -9.64734 |
| 128 | 0.0485  | 0.04325 | 0.0315  | 3.94E-07 | 6.46E-05 | -9.6472  |
| 130 | 0.05    | 0.0445  | 0.03275 | 4.09E-07 | 6.46E-05 | -9.64744 |
| 132 | 0.0505  | 0.04575 | 0.034   | 4.25E-07 | 6.46E-05 | -9.64768 |
| 134 | 0.0505  | 0.04525 | 0.0335  | 4.19E-07 | 6.46E-05 | -9.64759 |
| 136 | 0.05325 | 0.04725 | 0.0355  | 4.44E-07 | 6.46E-05 | -9.64797 |
| 138 | 0.05375 | 0.048   | 0.03625 | 4.53E-07 | 6.45E-05 | -9.64812 |

|     |         |         |         |          |          |          |
|-----|---------|---------|---------|----------|----------|----------|
| 140 | 0.054   | 0.0485  | 0.03675 | 4.59E-07 | 6.45E-05 | -9.64822 |
| 142 | 0.0545  | 0.049   | 0.03725 | 4.66E-07 | 6.45E-05 | -9.64831 |
| 144 | 0.056   | 0.05025 | 0.0385  | 4.81E-07 | 6.45E-05 | -9.64855 |
| 146 | 0.05575 | 0.05    | 0.03825 | 4.78E-07 | 6.45E-05 | -9.64851 |
| 148 | 0.058   | 0.05175 | 0.04    | 5E-07    | 6.45E-05 | -9.64885 |
| 150 | 0.05675 | 0.05125 | 0.0395  | 4.94E-07 | 6.45E-05 | -9.64875 |
| 152 | 0.058   | 0.052   | 0.04025 | 5.03E-07 | 6.45E-05 | -9.64889 |
| 154 | 0.05875 | 0.05275 | 0.041   | 5.13E-07 | 6.45E-05 | -9.64904 |
| 156 | 0.0595  | 0.0535  | 0.04175 | 5.22E-07 | 6.45E-05 | -9.64918 |
| 158 | 0.05975 | 0.0535  | 0.04175 | 5.22E-07 | 6.45E-05 | -9.64918 |
| 160 | 0.0605  | 0.05375 | 0.042   | 5.25E-07 | 6.45E-05 | -9.64923 |
| 162 | 0.06125 | 0.0545  | 0.04275 | 5.34E-07 | 6.45E-05 | -9.64938 |
| 164 | 0.0615  | 0.05525 | 0.0435  | 5.44E-07 | 6.45E-05 | -9.64952 |
| 166 | 0.0625  | 0.056   | 0.04425 | 5.53E-07 | 6.44E-05 | -9.64967 |
| 168 | 0.064   | 0.05675 | 0.045   | 5.63E-07 | 6.44E-05 | -9.64981 |
| 170 | 0.0645  | 0.0575  | 0.04575 | 5.72E-07 | 6.44E-05 | -9.64996 |
| 172 | 0.06475 | 0.05825 | 0.0465  | 5.81E-07 | 6.44E-05 | -9.65011 |
| 174 | 0.0655  | 0.05875 | 0.047   | 5.88E-07 | 6.44E-05 | -9.6502  |
| 176 | 0.066   | 0.05925 | 0.0475  | 5.94E-07 | 6.44E-05 | -9.6503  |
| 178 | 0.06725 | 0.0605  | 0.04875 | 6.09E-07 | 6.44E-05 | -9.65054 |
| 180 | 0.06825 | 0.06275 | 0.051   | 6.38E-07 | 6.44E-05 | -9.65098 |
| 182 | 0.06925 | 0.06275 | 0.051   | 6.38E-07 | 6.44E-05 | -9.65098 |
| 184 | 0.06825 | 0.062   | 0.05025 | 6.28E-07 | 6.44E-05 | -9.65083 |
| 186 | 0.0705  | 0.06425 | 0.0525  | 6.56E-07 | 6.43E-05 | -9.65127 |
| 188 | 0.07    | 0.0635  | 0.05175 | 6.47E-07 | 6.44E-05 | -9.65113 |
| 190 | 0.07175 | 0.0655  | 0.05375 | 6.72E-07 | 6.43E-05 | -9.65151 |
| 192 | 0.0715  | 0.06575 | 0.054   | 6.75E-07 | 6.43E-05 | -9.65156 |
| 194 | 0.073   | 0.0665  | 0.05475 | 6.84E-07 | 6.43E-05 | -9.65171 |
| 196 | 0.0735  | 0.06675 | 0.055   | 6.88E-07 | 6.43E-05 | -9.65176 |
| 198 | 0.07425 | 0.067   | 0.05525 | 6.91E-07 | 6.43E-05 | -9.65181 |
| 200 | 0.075   | 0.068   | 0.05625 | 7.03E-07 | 6.43E-05 | -9.652   |
| 202 | 0.076   | 0.0695  | 0.05775 | 7.22E-07 | 6.43E-05 | -9.65229 |
| 204 | 0.076   | 0.06925 | 0.0575  | 7.19E-07 | 6.43E-05 | -9.65224 |
| 206 | 0.07675 | 0.07025 | 0.0585  | 7.31E-07 | 6.43E-05 | -9.65244 |
| 208 | 0.07775 | 0.071   | 0.05925 | 7.41E-07 | 6.43E-05 | -9.65258 |
| 210 | 0.07725 | 0.07125 | 0.0595  | 7.44E-07 | 6.43E-05 | -9.65263 |
| 212 | 0.07875 | 0.072   | 0.06025 | 7.53E-07 | 6.42E-05 | -9.65278 |
| 214 | 0.07825 | 0.07275 | 0.061   | 7.63E-07 | 6.42E-05 | -9.65292 |
| 216 | 0.081   | 0.07375 | 0.062   | 7.75E-07 | 6.42E-05 | -9.65312 |
| 218 | 0.08075 | 0.074   | 0.06225 | 7.78E-07 | 6.42E-05 | -9.65317 |
| 220 | 0.08175 | 0.07525 | 0.0635  | 7.94E-07 | 6.42E-05 | -9.65341 |
| 222 | 0.0825  | 0.07575 | 0.064   | 8E-07    | 6.42E-05 | -9.65351 |
| 224 | 0.08325 | 0.0765  | 0.06475 | 8.09E-07 | 6.42E-05 | -9.65365 |
| 226 | 0.084   | 0.07675 | 0.065   | 8.13E-07 | 6.42E-05 | -9.6537  |
| 228 | 0.085   | 0.078   | 0.06625 | 8.28E-07 | 6.42E-05 | -9.65395 |
| 230 | 0.08475 | 0.07775 | 0.066   | 8.25E-07 | 6.42E-05 | -9.6539  |

|     |         |         |         |          |          |          |
|-----|---------|---------|---------|----------|----------|----------|
| 232 | 0.085   | 0.0785  | 0.06675 | 8.34E-07 | 6.42E-05 | -9.65404 |
| 234 | 0.08625 | 0.07925 | 0.0675  | 8.44E-07 | 6.42E-05 | -9.65419 |
| 236 | 0.0875  | 0.07975 | 0.068   | 8.5E-07  | 6.42E-05 | -9.65429 |
| 238 | 0.08775 | 0.07975 | 0.068   | 8.5E-07  | 6.42E-05 | -9.65429 |
| 240 | 0.08825 | 0.081   | 0.06925 | 8.66E-07 | 6.41E-05 | -9.65453 |
| 242 | 0.08925 | 0.0815  | 0.06975 | 8.72E-07 | 6.41E-05 | -9.65463 |
| 244 | 0.09125 | 0.08325 | 0.0715  | 8.94E-07 | 6.41E-05 | -9.65497 |
| 246 | 0.09125 | 0.083   | 0.07125 | 8.91E-07 | 6.41E-05 | -9.65492 |
| 248 | 0.09    | 0.08325 | 0.0715  | 8.94E-07 | 6.41E-05 | -9.65497 |
| 250 | 0.0925  | 0.08425 | 0.0725  | 9.06E-07 | 6.41E-05 | -9.65516 |
| 252 | 0.093   | 0.08475 | 0.073   | 9.13E-07 | 6.41E-05 | -9.65526 |
| 254 | 0.09325 | 0.08525 | 0.0735  | 9.19E-07 | 6.41E-05 | -9.65536 |
| 256 | 0.0955  | 0.08775 | 0.076   | 9.5E-07  | 6.41E-05 | -9.65585 |
| 258 | 0.095   | 0.08775 | 0.076   | 9.5E-07  | 6.41E-05 | -9.65585 |
| 260 | 0.09575 | 0.08775 | 0.076   | 9.5E-07  | 6.41E-05 | -9.65585 |
| 262 | 0.096   | 0.088   | 0.07625 | 9.53E-07 | 6.4E-05  | -9.6559  |
| 264 | 0.09625 | 0.08825 | 0.0765  | 9.56E-07 | 6.4E-05  | -9.65594 |
| 266 | 0.09825 | 0.09    | 0.07825 | 9.78E-07 | 6.4E-05  | -9.65629 |
| 268 | 0.09825 | 0.08975 | 0.078   | 9.75E-07 | 6.4E-05  | -9.65624 |
| 270 | 0.099   | 0.091   | 0.07925 | 9.91E-07 | 6.4E-05  | -9.65648 |
| 272 | 0.1005  | 0.0925  | 0.08075 | 1.01E-06 | 6.4E-05  | -9.65677 |
| 274 | 0.10125 | 0.0915  | 0.07975 | 9.97E-07 | 6.4E-05  | -9.65658 |
| 276 | 0.10225 | 0.09375 | 0.082   | 1.03E-06 | 6.4E-05  | -9.65702 |
| 278 | 0.102   | 0.0935  | 0.08175 | 1.02E-06 | 6.4E-05  | -9.65697 |
| 280 | 0.103   | 0.09425 | 0.0825  | 1.03E-06 | 6.4E-05  | -9.65712 |
| 282 | 0.10375 | 0.09525 | 0.0835  | 1.04E-06 | 6.4E-05  | -9.65731 |
| 284 | 0.1045  | 0.096   | 0.08425 | 1.05E-06 | 6.39E-05 | -9.65746 |
| 286 | 0.10525 | 0.097   | 0.08525 | 1.07E-06 | 6.39E-05 | -9.65765 |
| 288 | 0.1055  | 0.09675 | 0.085   | 1.06E-06 | 6.39E-05 | -9.6576  |
| 290 | 0.106   | 0.0965  | 0.08475 | 1.06E-06 | 6.39E-05 | -9.65756 |
| 292 | 0.10775 | 0.0995  | 0.08775 | 1.1E-06  | 6.39E-05 | -9.65814 |
| 294 | 0.10825 | 0.09975 | 0.088   | 1.1E-06  | 6.39E-05 | -9.65819 |
| 296 | 0.109   | 0.09875 | 0.087   | 1.09E-06 | 6.39E-05 | -9.658   |
| 298 | 0.11    | 0.10125 | 0.0895  | 1.12E-06 | 6.39E-05 | -9.65848 |

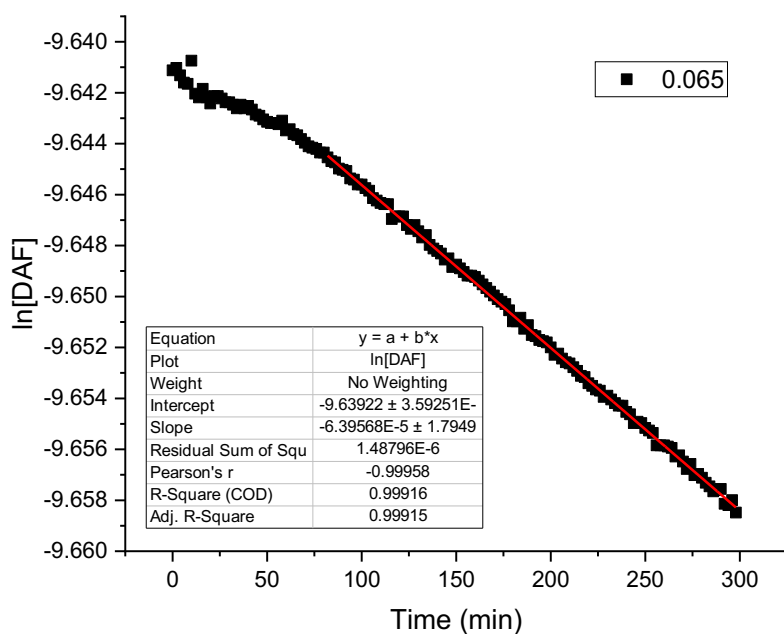

0.100 mM

CoHwCl, 50 mM PBS pH 7, [DAF]=0.065 mM

| Time (min) | A@490nm | A@490nm minus BK | set to zero | [FLU] (M) | [DAF] (M) | ln[DAF]  |
|------------|---------|------------------|-------------|-----------|-----------|----------|
| 0          | 0.02875 | 0.018            | 0           | 0         | 0.000065  | -9.64112 |
| 2          | 0.029   | 0.01975          | 0.00175     | 2.19E-08  | 6.5E-05   | -9.64146 |
| 4          | 0.029   | 0.021            | 0.003       | 3.75E-08  | 6.5E-05   | -9.6417  |
| 6          | 0.029   | 0.02125          | 0.00325     | 4.06E-08  | 6.5E-05   | -9.64175 |
| 8          | 0.02825 | 0.0205           | 0.0025      | 3.13E-08  | 6.5E-05   | -9.6416  |
| 10         | 0.0285  | 0.01675          | -0.00125    | -1.6E-08  | 6.5E-05   | -9.64088 |
| 12         | 0.02875 | 0.024            | 0.006       | 7.5E-08   | 6.49E-05  | -9.64228 |
| 14         | 0.02925 | 0.024263         | 0.006263    | 7.83E-08  | 6.49E-05  | -9.64233 |
| 16         | 0.0285  | 0.023            | 0.005       | 6.25E-08  | 6.49E-05  | -9.64209 |
| 18         | 0.02875 | 0.02425          | 0.00625     | 7.81E-08  | 6.49E-05  | -9.64233 |
| 20         | 0.03    | 0.0265           | 0.0085      | 1.06E-07  | 6.49E-05  | -9.64276 |
| 22         | 0.0295  | 0.0245           | 0.0065      | 8.13E-08  | 6.49E-05  | -9.64237 |
| 24         | 0.0305  | 0.0255           | 0.0075      | 9.38E-08  | 6.49E-05  | -9.64257 |
| 26         | 0.0305  | 0.0255           | 0.0075      | 9.38E-08  | 6.49E-05  | -9.64257 |
| 28         | 0.031   | 0.0255           | 0.0075      | 9.38E-08  | 6.49E-05  | -9.64257 |
| 30         | 0.03125 | 0.02575          | 0.00775     | 9.69E-08  | 6.49E-05  | -9.64261 |
| 32         | 0.032   | 0.02675          | 0.00875     | 1.09E-07  | 6.49E-05  | -9.64281 |
| 34         | 0.033   | 0.028            | 0.01        | 1.25E-07  | 6.49E-05  | -9.64305 |
| 36         | 0.034   | 0.02825          | 0.01025     | 1.28E-07  | 6.49E-05  | -9.6431  |
| 38         | 0.03325 | 0.028            | 0.01        | 1.25E-07  | 6.49E-05  | -9.64305 |
| 40         | 0.035   | 0.029            | 0.011       | 1.38E-07  | 6.49E-05  | -9.64324 |
| 42         | 0.03525 | 0.02925          | 0.01125     | 1.41E-07  | 6.49E-05  | -9.64329 |
| 44         | 0.03675 | 0.03125          | 0.01325     | 1.66E-07  | 6.48E-05  | -9.64367 |
| 46         | 0.03775 | 0.0325           | 0.0145      | 1.81E-07  | 6.48E-05  | -9.64392 |
| 48         | 0.03925 | 0.03325          | 0.01525     | 1.91E-07  | 6.48E-05  | -9.64406 |

|     |         |         |         |          |          |          |
|-----|---------|---------|---------|----------|----------|----------|
| 50  | 0.03875 | 0.03375 | 0.01575 | 1.97E-07 | 6.48E-05 | -9.64416 |
| 52  | 0.04025 | 0.03425 | 0.01625 | 2.03E-07 | 6.48E-05 | -9.64425 |
| 54  | 0.03975 | 0.034   | 0.016   | 2E-07    | 6.48E-05 | -9.6442  |
| 56  | 0.03975 | 0.03375 | 0.01575 | 1.97E-07 | 6.48E-05 | -9.64416 |
| 58  | 0.0415  | 0.034   | 0.016   | 2E-07    | 6.48E-05 | -9.6442  |
| 60  | 0.0415  | 0.0355  | 0.0175  | 2.19E-07 | 6.48E-05 | -9.64449 |
| 62  | 0.04175 | 0.03575 | 0.01775 | 2.22E-07 | 6.48E-05 | -9.64454 |
| 64  | 0.04225 | 0.0365  | 0.0185  | 2.31E-07 | 6.48E-05 | -9.64469 |
| 66  | 0.04325 | 0.03775 | 0.01975 | 2.47E-07 | 6.48E-05 | -9.64493 |
| 68  | 0.0435  | 0.03775 | 0.01975 | 2.47E-07 | 6.48E-05 | -9.64493 |
| 70  | 0.0455  | 0.03925 | 0.02125 | 2.66E-07 | 6.47E-05 | -9.64522 |
| 72  | 0.04525 | 0.03975 | 0.02175 | 2.72E-07 | 6.47E-05 | -9.64531 |
| 74  | 0.04675 | 0.04025 | 0.02225 | 2.78E-07 | 6.47E-05 | -9.64541 |
| 76  | 0.04725 | 0.04125 | 0.02325 | 2.91E-07 | 6.47E-05 | -9.6456  |
| 78  | 0.05    | 0.04375 | 0.02575 | 3.22E-07 | 6.47E-05 | -9.64609 |
| 80  | 0.04825 | 0.0425  | 0.0245  | 3.06E-07 | 6.47E-05 | -9.64585 |
| 82  | 0.04925 | 0.043   | 0.025   | 3.13E-07 | 6.47E-05 | -9.64594 |
| 84  | 0.0505  | 0.0445  | 0.0265  | 3.31E-07 | 6.47E-05 | -9.64623 |
| 86  | 0.0505  | 0.04475 | 0.02675 | 3.34E-07 | 6.47E-05 | -9.64628 |
| 88  | 0.051   | 0.04625 | 0.02825 | 3.53E-07 | 6.46E-05 | -9.64657 |
| 90  | 0.05275 | 0.04725 | 0.02925 | 3.66E-07 | 6.46E-05 | -9.64676 |
| 92  | 0.0535  | 0.0475  | 0.0295  | 3.69E-07 | 6.46E-05 | -9.64681 |
| 94  | 0.05425 | 0.0485  | 0.0305  | 3.81E-07 | 6.46E-05 | -9.64701 |
| 96  | 0.0545  | 0.049   | 0.031   | 3.88E-07 | 6.46E-05 | -9.6471  |
| 98  | 0.05475 | 0.04925 | 0.03125 | 3.91E-07 | 6.46E-05 | -9.64715 |
| 100 | 0.056   | 0.05025 | 0.03225 | 4.03E-07 | 6.46E-05 | -9.64734 |
| 102 | 0.057   | 0.05125 | 0.03325 | 4.16E-07 | 6.46E-05 | -9.64754 |
| 104 | 0.058   | 0.0515  | 0.0335  | 4.19E-07 | 6.46E-05 | -9.64759 |
| 106 | 0.05825 | 0.0535  | 0.0355  | 4.44E-07 | 6.46E-05 | -9.64797 |
| 108 | 0.05875 | 0.05325 | 0.03525 | 4.41E-07 | 6.46E-05 | -9.64793 |
| 110 | 0.0605  | 0.05525 | 0.03725 | 4.66E-07 | 6.45E-05 | -9.64831 |
| 112 | 0.061   | 0.05475 | 0.03675 | 4.59E-07 | 6.45E-05 | -9.64822 |
| 114 | 0.06125 | 0.0555  | 0.0375  | 4.69E-07 | 6.45E-05 | -9.64836 |
| 116 | 0.0625  | 0.05825 | 0.04025 | 5.03E-07 | 6.45E-05 | -9.64889 |
| 118 | 0.06325 | 0.05775 | 0.03975 | 4.97E-07 | 6.45E-05 | -9.6488  |
| 120 | 0.0635  | 0.05825 | 0.04025 | 5.03E-07 | 6.45E-05 | -9.64889 |
| 122 | 0.065   | 0.0585  | 0.0405  | 5.06E-07 | 6.45E-05 | -9.64894 |
| 124 | 0.067   | 0.061   | 0.043   | 5.38E-07 | 6.45E-05 | -9.64943 |
| 126 | 0.06675 | 0.06175 | 0.04375 | 5.47E-07 | 6.45E-05 | -9.64957 |
| 128 | 0.0665  | 0.06125 | 0.04325 | 5.41E-07 | 6.45E-05 | -9.64948 |
| 130 | 0.06725 | 0.06175 | 0.04375 | 5.47E-07 | 6.45E-05 | -9.64957 |
| 132 | 0.068   | 0.06325 | 0.04525 | 5.66E-07 | 6.44E-05 | -9.64986 |
| 134 | 0.069   | 0.06375 | 0.04575 | 5.72E-07 | 6.44E-05 | -9.64996 |
| 136 | 0.0715  | 0.0655  | 0.0475  | 5.94E-07 | 6.44E-05 | -9.6503  |
| 138 | 0.07175 | 0.066   | 0.048   | 6E-07    | 6.44E-05 | -9.6504  |
| 140 | 0.0725  | 0.067   | 0.049   | 6.13E-07 | 6.44E-05 | -9.65059 |



|     |         |         |         |          |          |          |
|-----|---------|---------|---------|----------|----------|----------|
| 142 | 0.0725  | 0.067   | 0.049   | 6.13E-07 | 6.44E-05 | -9.65059 |
| 144 | 0.075   | 0.06925 | 0.05125 | 6.41E-07 | 6.44E-05 | -9.65103 |
| 146 | 0.07525 | 0.0695  | 0.0515  | 6.44E-07 | 6.44E-05 | -9.65108 |
| 148 | 0.0765  | 0.07025 | 0.05225 | 6.53E-07 | 6.43E-05 | -9.65122 |
| 150 | 0.07675 | 0.07125 | 0.05325 | 6.66E-07 | 6.43E-05 | -9.65142 |
| 152 | 0.0775  | 0.0715  | 0.0535  | 6.69E-07 | 6.43E-05 | -9.65147 |
| 154 | 0.079   | 0.073   | 0.055   | 6.88E-07 | 6.43E-05 | -9.65176 |
| 156 | 0.07975 | 0.07375 | 0.05575 | 6.97E-07 | 6.43E-05 | -9.6519  |
| 158 | 0.0805  | 0.07425 | 0.05625 | 7.03E-07 | 6.43E-05 | -9.652   |
| 160 | 0.08125 | 0.0745  | 0.0565  | 7.06E-07 | 6.43E-05 | -9.65205 |
| 162 | 0.08225 | 0.0755  | 0.0575  | 7.19E-07 | 6.43E-05 | -9.65224 |
| 164 | 0.08275 | 0.0765  | 0.0585  | 7.31E-07 | 6.43E-05 | -9.65244 |
| 166 | 0.0835  | 0.077   | 0.059   | 7.38E-07 | 6.43E-05 | -9.65253 |
| 168 | 0.08525 | 0.078   | 0.06    | 7.5E-07  | 6.43E-05 | -9.65273 |
| 170 | 0.08625 | 0.07925 | 0.06125 | 7.66E-07 | 6.42E-05 | -9.65297 |
| 172 | 0.0865  | 0.08    | 0.062   | 7.75E-07 | 6.42E-05 | -9.65312 |
| 174 | 0.088   | 0.08125 | 0.06325 | 7.91E-07 | 6.42E-05 | -9.65336 |
| 176 | 0.08825 | 0.0815  | 0.0635  | 7.94E-07 | 6.42E-05 | -9.65341 |
| 178 | 0.09    | 0.08325 | 0.06525 | 8.16E-07 | 6.42E-05 | -9.65375 |
| 180 | 0.091   | 0.0855  | 0.0675  | 8.44E-07 | 6.42E-05 | -9.65419 |
| 182 | 0.092   | 0.0855  | 0.0675  | 8.44E-07 | 6.42E-05 | -9.65419 |
| 184 | 0.0915  | 0.08525 | 0.06725 | 8.41E-07 | 6.42E-05 | -9.65414 |
| 186 | 0.094   | 0.08775 | 0.06975 | 8.72E-07 | 6.41E-05 | -9.65463 |
| 188 | 0.09325 | 0.08675 | 0.06875 | 8.59E-07 | 6.41E-05 | -9.65443 |
| 190 | 0.09475 | 0.0885  | 0.0705  | 8.81E-07 | 6.41E-05 | -9.65477 |
| 192 | 0.096   | 0.09025 | 0.07225 | 9.03E-07 | 6.41E-05 | -9.65511 |
| 194 | 0.09675 | 0.09025 | 0.07225 | 9.03E-07 | 6.41E-05 | -9.65511 |
| 196 | 0.0975  | 0.09075 | 0.07275 | 9.09E-07 | 6.41E-05 | -9.65521 |
| 198 | 0.09925 | 0.092   | 0.074   | 9.25E-07 | 6.41E-05 | -9.65546 |
| 200 | 0.09975 | 0.09275 | 0.07475 | 9.34E-07 | 6.41E-05 | -9.6556  |
| 202 | 0.1005  | 0.094   | 0.076   | 9.5E-07  | 6.41E-05 | -9.65585 |
| 204 | 0.101   | 0.09425 | 0.07625 | 9.53E-07 | 6.4E-05  | -9.6559  |
| 206 | 0.1015  | 0.095   | 0.077   | 9.63E-07 | 6.4E-05  | -9.65604 |
| 208 | 0.10375 | 0.097   | 0.079   | 9.88E-07 | 6.4E-05  | -9.65643 |
| 210 | 0.103   | 0.097   | 0.079   | 9.88E-07 | 6.4E-05  | -9.65643 |
| 212 | 0.105   | 0.09825 | 0.08025 | 1E-06    | 6.4E-05  | -9.65668 |
| 214 | 0.10425 | 0.09875 | 0.08075 | 1.01E-06 | 6.4E-05  | -9.65677 |
| 216 | 0.106   | 0.09875 | 0.08075 | 1.01E-06 | 6.4E-05  | -9.65677 |
| 218 | 0.1065  | 0.09975 | 0.08175 | 1.02E-06 | 6.4E-05  | -9.65697 |
| 220 | 0.10725 | 0.10075 | 0.08275 | 1.03E-06 | 6.4E-05  | -9.65716 |
| 222 | 0.10875 | 0.102   | 0.084   | 1.05E-06 | 6.4E-05  | -9.65741 |
| 224 | 0.10975 | 0.103   | 0.085   | 1.06E-06 | 6.39E-05 | -9.6576  |
| 226 | 0.1105  | 0.10325 | 0.08525 | 1.07E-06 | 6.39E-05 | -9.65765 |
| 228 | 0.1115  | 0.1045  | 0.0865  | 1.08E-06 | 6.39E-05 | -9.6579  |
| 230 | 0.1115  | 0.1045  | 0.0865  | 1.08E-06 | 6.39E-05 | -9.6579  |
| 232 | 0.11125 | 0.10475 | 0.08675 | 1.08E-06 | 6.39E-05 | -9.65795 |

|     |         |         |         |          |          |          |
|-----|---------|---------|---------|----------|----------|----------|
| 234 | 0.11375 | 0.10675 | 0.08875 | 1.11E-06 | 6.39E-05 | -9.65834 |
| 236 | 0.11425 | 0.1065  | 0.0885  | 1.11E-06 | 6.39E-05 | -9.65829 |
| 238 | 0.11475 | 0.10675 | 0.08875 | 1.11E-06 | 6.39E-05 | -9.65834 |
| 240 | 0.116   | 0.10875 | 0.09075 | 1.13E-06 | 6.39E-05 | -9.65873 |
| 242 | 0.11675 | 0.109   | 0.091   | 1.14E-06 | 6.39E-05 | -9.65878 |
| 244 | 0.11825 | 0.11025 | 0.09225 | 1.15E-06 | 6.38E-05 | -9.65902 |
| 246 | 0.11875 | 0.1105  | 0.0925  | 1.16E-06 | 6.38E-05 | -9.65907 |
| 248 | 0.118   | 0.11125 | 0.09325 | 1.17E-06 | 6.38E-05 | -9.65922 |
| 250 | 0.12025 | 0.112   | 0.094   | 1.18E-06 | 6.38E-05 | -9.65937 |
| 252 | 0.12125 | 0.113   | 0.095   | 1.19E-06 | 6.38E-05 | -9.65956 |
| 254 | 0.12125 | 0.11325 | 0.09525 | 1.19E-06 | 6.38E-05 | -9.65961 |
| 256 | 0.1235  | 0.11575 | 0.09775 | 1.22E-06 | 6.38E-05 | -9.6601  |
| 258 | 0.12375 | 0.1165  | 0.0985  | 1.23E-06 | 6.38E-05 | -9.66025 |
| 260 | 0.12475 | 0.11675 | 0.09875 | 1.23E-06 | 6.38E-05 | -9.6603  |
| 262 | 0.1255  | 0.1175  | 0.0995  | 1.24E-06 | 6.38E-05 | -9.66044 |
| 264 | 0.12625 | 0.11825 | 0.10025 | 1.25E-06 | 6.37E-05 | -9.66059 |
| 266 | 0.127   | 0.11875 | 0.10075 | 1.26E-06 | 6.37E-05 | -9.66069 |
| 268 | 0.12775 | 0.11925 | 0.10125 | 1.27E-06 | 6.37E-05 | -9.66079 |
| 270 | 0.1295  | 0.1215  | 0.1035  | 1.29E-06 | 6.37E-05 | -9.66123 |
| 272 | 0.12975 | 0.12175 | 0.10375 | 1.3E-06  | 6.37E-05 | -9.66128 |
| 274 | 0.1305  | 0.12075 | 0.10275 | 1.28E-06 | 6.37E-05 | -9.66108 |
| 276 | 0.132   | 0.1235  | 0.1055  | 1.32E-06 | 6.37E-05 | -9.66162 |
| 278 | 0.13175 | 0.12325 | 0.10525 | 1.32E-06 | 6.37E-05 | -9.66157 |
| 280 | 0.13375 | 0.125   | 0.107   | 1.34E-06 | 6.37E-05 | -9.66191 |
| 282 | 0.1345  | 0.126   | 0.108   | 1.35E-06 | 6.37E-05 | -9.66211 |
| 284 | 0.135   | 0.1265  | 0.1085  | 1.36E-06 | 6.36E-05 | -9.66221 |
| 286 | 0.13625 | 0.128   | 0.11    | 1.38E-06 | 6.36E-05 | -9.6625  |
| 288 | 0.1365  | 0.12775 | 0.10975 | 1.37E-06 | 6.36E-05 | -9.66245 |
| 290 | 0.13725 | 0.12775 | 0.10975 | 1.37E-06 | 6.36E-05 | -9.66245 |
| 292 | 0.139   | 0.13075 | 0.11275 | 1.41E-06 | 6.36E-05 | -9.66304 |
| 294 | 0.139   | 0.1305  | 0.1125  | 1.41E-06 | 6.36E-05 | -9.663   |
| 296 | 0.14025 | 0.13    | 0.112   | 1.4E-06  | 6.36E-05 | -9.6629  |
| 298 | 0.1415  | 0.13275 | 0.11475 | 1.43E-06 | 6.36E-05 | -9.66344 |

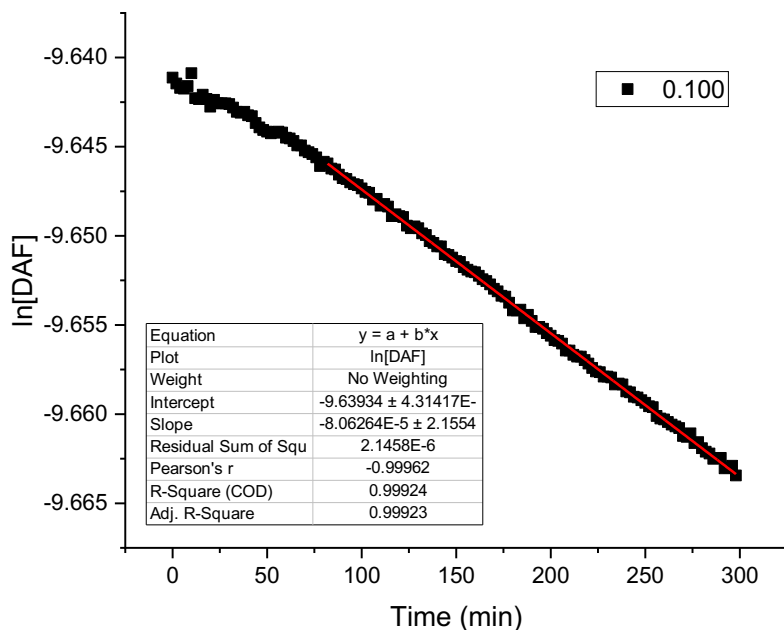

**0.125 mM CoHwCl, 50 mM PBS pH 7, [DAF]=0.065 mM**

| Time (min) | A@490nm | A@490nm minus BK | set to zero | [FLU] (M) | [DAF] (M) | ln[DAF]  |
|------------|---------|------------------|-------------|-----------|-----------|----------|
| 0 min      | 0.031   | 0.02025          | 0           | 0         | 0.000065  | -9.64112 |
| 2 min      | 0.03025 | 0.021            | 0.00075     | 9.37E-09  | 6.5E-05   | -9.64127 |
| 4 min      | 0.02975 | 0.02175          | 0.0015      | 1.88E-08  | 6.5E-05   | -9.64141 |
| 6 min      | 0.0315  | 0.02375          | 0.0035      | 4.38E-08  | 6.5E-05   | -9.6418  |
| 8 min      | 0.03125 | 0.0235           | 0.00325     | 4.06E-08  | 6.5E-05   | -9.64175 |
| 10 min     | 0.03075 | 0.019            | -0.00125    | -1.6E-08  | 6.5E-05   | -9.64088 |
| 12 min     | 0.0305  | 0.02575          | 0.0055      | 6.88E-08  | 6.49E-05  | -9.64218 |
| 14 min     | 0.03175 | 0.026763         | 0.006513    | 8.14E-08  | 6.49E-05  | -9.64238 |
| 16 min     | 0.03175 | 0.02625          | 0.006       | 7.5E-08   | 6.49E-05  | -9.64228 |
| 18 min     | 0.03175 | 0.02725          | 0.007       | 8.75E-08  | 6.49E-05  | -9.64247 |
| 20 min     | 0.033   | 0.0295           | 0.00925     | 1.16E-07  | 6.49E-05  | -9.6429  |
| 22 min     | 0.03275 | 0.02775          | 0.0075      | 9.38E-08  | 6.49E-05  | -9.64257 |
| 24 min     | 0.03375 | 0.02875          | 0.0085      | 1.06E-07  | 6.49E-05  | -9.64276 |
| 26 min     | 0.03425 | 0.02925          | 0.009       | 1.13E-07  | 6.49E-05  | -9.64286 |
| 28 min     | 0.03525 | 0.02975          | 0.0095      | 1.19E-07  | 6.49E-05  | -9.64295 |
| 30 min     | 0.03525 | 0.02975          | 0.0095      | 1.19E-07  | 6.49E-05  | -9.64295 |
| 32 min     | 0.0355  | 0.03025          | 0.01        | 1.25E-07  | 6.49E-05  | -9.64305 |
| 34 min     | 0.0365  | 0.0315           | 0.01125     | 1.41E-07  | 6.49E-05  | -9.64329 |
| 36 min     | 0.0375  | 0.03175          | 0.0115      | 1.44E-07  | 6.49E-05  | -9.64334 |
| 38 min     | 0.0375  | 0.03225          | 0.012       | 1.5E-07   | 6.49E-05  | -9.64343 |
| 40 min     | 0.0385  | 0.0325           | 0.01225     | 1.53E-07  | 6.48E-05  | -9.64348 |
| 42 min     | 0.039   | 0.033            | 0.01275     | 1.59E-07  | 6.48E-05  | -9.64358 |
| 44 min     | 0.04    | 0.0345           | 0.01425     | 1.78E-07  | 6.48E-05  | -9.64387 |

|         |         |         |         |          |          |          |
|---------|---------|---------|---------|----------|----------|----------|
| 46 min  | 0.04    | 0.03475 | 0.0145  | 1.81E-07 | 6.48E-05 | -9.64392 |
| 48 min  | 0.04175 | 0.03575 | 0.0155  | 1.94E-07 | 6.48E-05 | -9.64411 |
| 50 min  | 0.0415  | 0.0365  | 0.01625 | 2.03E-07 | 6.48E-05 | -9.64425 |
| 52 min  | 0.0435  | 0.0375  | 0.01725 | 2.16E-07 | 6.48E-05 | -9.64445 |
| 54 min  | 0.0435  | 0.03775 | 0.0175  | 2.19E-07 | 6.48E-05 | -9.64449 |
| 56 min  | 0.04425 | 0.03825 | 0.018   | 2.25E-07 | 6.48E-05 | -9.64459 |
| 58 min  | 0.04525 | 0.03775 | 0.0175  | 2.19E-07 | 6.48E-05 | -9.64449 |
| 60 min  | 0.046   | 0.04    | 0.01975 | 2.47E-07 | 6.48E-05 | -9.64493 |
| 62 min  | 0.04625 | 0.04025 | 0.02    | 2.5E-07  | 6.48E-05 | -9.64498 |
| 64 min  | 0.04675 | 0.041   | 0.02075 | 2.59E-07 | 6.47E-05 | -9.64512 |
| 66 min  | 0.04775 | 0.04225 | 0.022   | 2.75E-07 | 6.47E-05 | -9.64536 |
| 68 min  | 0.0485  | 0.04275 | 0.0225  | 2.81E-07 | 6.47E-05 | -9.64546 |
| 70 min  | 0.0505  | 0.04425 | 0.024   | 3E-07    | 6.47E-05 | -9.64575 |
| 72 min  | 0.051   | 0.0455  | 0.02525 | 3.16E-07 | 6.47E-05 | -9.64599 |
| 74 min  | 0.0525  | 0.046   | 0.02575 | 3.22E-07 | 6.47E-05 | -9.64609 |
| 76 min  | 0.0525  | 0.0465  | 0.02625 | 3.28E-07 | 6.47E-05 | -9.64618 |
| 78 min  | 0.05375 | 0.0475  | 0.02725 | 3.41E-07 | 6.47E-05 | -9.64638 |
| 80 min  | 0.055   | 0.04925 | 0.029   | 3.63E-07 | 6.46E-05 | -9.64672 |
| 82 min  | 0.056   | 0.04975 | 0.0295  | 3.69E-07 | 6.46E-05 | -9.64681 |
| 84 min  | 0.057   | 0.051   | 0.03075 | 3.84E-07 | 6.46E-05 | -9.64705 |
| 86 min  | 0.05775 | 0.052   | 0.03175 | 3.97E-07 | 6.46E-05 | -9.64725 |
| 88 min  | 0.05825 | 0.0535  | 0.03325 | 4.16E-07 | 6.46E-05 | -9.64754 |
| 90 min  | 0.06025 | 0.05475 | 0.0345  | 4.31E-07 | 6.46E-05 | -9.64778 |
| 92 min  | 0.061   | 0.055   | 0.03475 | 4.34E-07 | 6.46E-05 | -9.64783 |
| 94 min  | 0.06225 | 0.0565  | 0.03625 | 4.53E-07 | 6.45E-05 | -9.64812 |
| 96 min  | 0.06325 | 0.05775 | 0.0375  | 4.69E-07 | 6.45E-05 | -9.64836 |
| 98 min  | 0.0645  | 0.059   | 0.03875 | 4.84E-07 | 6.45E-05 | -9.6486  |
| 100 min | 0.0655  | 0.05975 | 0.0395  | 4.94E-07 | 6.45E-05 | -9.64875 |
| 102 min | 0.066   | 0.06025 | 0.04    | 5E-07    | 6.45E-05 | -9.64885 |
| 104 min | 0.068   | 0.0615  | 0.04125 | 5.16E-07 | 6.45E-05 | -9.64909 |
| 106 min | 0.06775 | 0.063   | 0.04275 | 5.34E-07 | 6.45E-05 | -9.64938 |
| 108 min | 0.07    | 0.0645  | 0.04425 | 5.53E-07 | 6.44E-05 | -9.64967 |
| 110 min | 0.07075 | 0.0655  | 0.04525 | 5.66E-07 | 6.44E-05 | -9.64986 |
| 112 min | 0.0725  | 0.06625 | 0.046   | 5.75E-07 | 6.44E-05 | -9.65001 |
| 114 min | 0.0725  | 0.06675 | 0.0465  | 5.81E-07 | 6.44E-05 | -9.65011 |
| 116 min | 0.0735  | 0.06925 | 0.049   | 6.13E-07 | 6.44E-05 | -9.65059 |
| 118 min | 0.07375 | 0.06825 | 0.048   | 6E-07    | 6.44E-05 | -9.6504  |
| 120 min | 0.07525 | 0.07    | 0.04975 | 6.22E-07 | 6.44E-05 | -9.65074 |
| 122 min | 0.077   | 0.0705  | 0.05025 | 6.28E-07 | 6.44E-05 | -9.65083 |
| 124 min | 0.0785  | 0.0725  | 0.05225 | 6.53E-07 | 6.43E-05 | -9.65122 |
| 126 min | 0.079   | 0.074   | 0.05375 | 6.72E-07 | 6.43E-05 | -9.65151 |
| 128 min | 0.07875 | 0.0735  | 0.05325 | 6.66E-07 | 6.43E-05 | -9.65142 |
| 130 min | 0.08075 | 0.07525 | 0.055   | 6.88E-07 | 6.43E-05 | -9.65176 |
| 132 min | 0.081   | 0.07625 | 0.056   | 7E-07    | 6.43E-05 | -9.65195 |
| 134 min | 0.08225 | 0.077   | 0.05675 | 7.09E-07 | 6.43E-05 | -9.6521  |
| 136 min | 0.08525 | 0.07925 | 0.059   | 7.38E-07 | 6.43E-05 | -9.65253 |

|         |         |         |         |          |          |          |
|---------|---------|---------|---------|----------|----------|----------|
| 138 min | 0.0855  | 0.07975 | 0.0595  | 7.44E-07 | 6.43E-05 | -9.65263 |
| 140 min | 0.08675 | 0.08125 | 0.061   | 7.63E-07 | 6.42E-05 | -9.65292 |
| 142 min | 0.08675 | 0.08125 | 0.061   | 7.63E-07 | 6.42E-05 | -9.65292 |
| 144 min | 0.09    | 0.08425 | 0.064   | 8E-07    | 6.42E-05 | -9.65351 |
| 146 min | 0.08975 | 0.084   | 0.06375 | 7.97E-07 | 6.42E-05 | -9.65346 |
| 148 min | 0.091   | 0.08475 | 0.0645  | 8.06E-07 | 6.42E-05 | -9.6536  |
| 150 min | 0.0915  | 0.086   | 0.06575 | 8.22E-07 | 6.42E-05 | -9.65385 |
| 152 min | 0.09275 | 0.08675 | 0.0665  | 8.31E-07 | 6.42E-05 | -9.65399 |
| 154 min | 0.0945  | 0.0885  | 0.06825 | 8.53E-07 | 6.41E-05 | -9.65434 |
| 156 min | 0.096   | 0.09    | 0.06975 | 8.72E-07 | 6.41E-05 | -9.65463 |
| 158 min | 0.09625 | 0.09    | 0.06975 | 8.72E-07 | 6.41E-05 | -9.65463 |
| 160 min | 0.09725 | 0.0905  | 0.07025 | 8.78E-07 | 6.41E-05 | -9.65472 |
| 162 min | 0.0985  | 0.09175 | 0.0715  | 8.94E-07 | 6.41E-05 | -9.65497 |
| 164 min | 0.09875 | 0.0925  | 0.07225 | 9.03E-07 | 6.41E-05 | -9.65511 |
| 166 min | 0.10075 | 0.09425 | 0.074   | 9.25E-07 | 6.41E-05 | -9.65546 |
| 168 min | 0.1025  | 0.09525 | 0.075   | 9.38E-07 | 6.41E-05 | -9.65565 |
| 170 min | 0.10325 | 0.09625 | 0.076   | 9.5E-07  | 6.41E-05 | -9.65585 |
| 172 min | 0.1045  | 0.098   | 0.07775 | 9.72E-07 | 6.4E-05  | -9.65619 |
| 174 min | 0.1055  | 0.09875 | 0.0785  | 9.81E-07 | 6.4E-05  | -9.65633 |
| 176 min | 0.10625 | 0.0995  | 0.07925 | 9.91E-07 | 6.4E-05  | -9.65648 |
| 178 min | 0.10725 | 0.1005  | 0.08025 | 1E-06    | 6.4E-05  | -9.65668 |
| 180 min | 0.10925 | 0.10375 | 0.0835  | 1.04E-06 | 6.4E-05  | -9.65731 |
| 182 min | 0.11025 | 0.10375 | 0.0835  | 1.04E-06 | 6.4E-05  | -9.65731 |
| 184 min | 0.1105  | 0.10425 | 0.084   | 1.05E-06 | 6.4E-05  | -9.65741 |
| 186 min | 0.1125  | 0.10625 | 0.086   | 1.08E-06 | 6.39E-05 | -9.6578  |
| 188 min | 0.113   | 0.1065  | 0.08625 | 1.08E-06 | 6.39E-05 | -9.65785 |
| 190 min | 0.114   | 0.10775 | 0.0875  | 1.09E-06 | 6.39E-05 | -9.65809 |
| 192 min | 0.11575 | 0.11    | 0.08975 | 1.12E-06 | 6.39E-05 | -9.65853 |
| 194 min | 0.11675 | 0.11025 | 0.09    | 1.13E-06 | 6.39E-05 | -9.65858 |
| 196 min | 0.118   | 0.11125 | 0.091   | 1.14E-06 | 6.39E-05 | -9.65878 |
| 198 min | 0.119   | 0.11175 | 0.0915  | 1.14E-06 | 6.39E-05 | -9.65888 |
| 200 min | 0.12025 | 0.11325 | 0.093   | 1.16E-06 | 6.38E-05 | -9.65917 |
| 202 min | 0.12075 | 0.11425 | 0.094   | 1.18E-06 | 6.38E-05 | -9.65937 |
| 204 min | 0.1215  | 0.11475 | 0.0945  | 1.18E-06 | 6.38E-05 | -9.65946 |
| 206 min | 0.123   | 0.1165  | 0.09625 | 1.2E-06  | 6.38E-05 | -9.65981 |
| 208 min | 0.125   | 0.11825 | 0.098   | 1.23E-06 | 6.38E-05 | -9.66015 |
| 210 min | 0.125   | 0.119   | 0.09875 | 1.23E-06 | 6.38E-05 | -9.6603  |
| 212 min | 0.12675 | 0.12    | 0.09975 | 1.25E-06 | 6.38E-05 | -9.66049 |
| 214 min | 0.12675 | 0.12125 | 0.101   | 1.26E-06 | 6.37E-05 | -9.66074 |
| 216 min | 0.129   | 0.12175 | 0.1015  | 1.27E-06 | 6.37E-05 | -9.66084 |
| 218 min | 0.129   | 0.12225 | 0.102   | 1.28E-06 | 6.37E-05 | -9.66093 |
| 220 min | 0.1305  | 0.124   | 0.10375 | 1.3E-06  | 6.37E-05 | -9.66128 |
| 222 min | 0.13175 | 0.125   | 0.10475 | 1.31E-06 | 6.37E-05 | -9.66147 |
| 224 min | 0.133   | 0.12625 | 0.106   | 1.33E-06 | 6.37E-05 | -9.66172 |
| 226 min | 0.13475 | 0.1275  | 0.10725 | 1.34E-06 | 6.37E-05 | -9.66196 |
| 228 min | 0.13525 | 0.12825 | 0.108   | 1.35E-06 | 6.37E-05 | -9.66211 |

|         |         |         |         |          |          |          |
|---------|---------|---------|---------|----------|----------|----------|
| 230 min | 0.135   | 0.128   | 0.10775 | 1.35E-06 | 6.37E-05 | -9.66206 |
| 232 min | 0.13575 | 0.12925 | 0.109   | 1.36E-06 | 6.36E-05 | -9.66231 |
| 234 min | 0.13725 | 0.13025 | 0.11    | 1.38E-06 | 6.36E-05 | -9.6625  |
| 236 min | 0.139   | 0.13125 | 0.111   | 1.39E-06 | 6.36E-05 | -9.6627  |
| 238 min | 0.14    | 0.132   | 0.11175 | 1.4E-06  | 6.36E-05 | -9.66285 |
| 240 min | 0.141   | 0.13375 | 0.1135  | 1.42E-06 | 6.36E-05 | -9.66319 |
| 242 min | 0.14225 | 0.1345  | 0.11425 | 1.43E-06 | 6.36E-05 | -9.66334 |
| 244 min | 0.14375 | 0.13575 | 0.1155  | 1.44E-06 | 6.36E-05 | -9.66359 |
| 246 min | 0.14525 | 0.137   | 0.11675 | 1.46E-06 | 6.35E-05 | -9.66383 |
| 248 min | 0.144   | 0.13725 | 0.117   | 1.46E-06 | 6.35E-05 | -9.66388 |
| 250 min | 0.14675 | 0.1385  | 0.11825 | 1.48E-06 | 6.35E-05 | -9.66413 |
| 252 min | 0.1475  | 0.13925 | 0.119   | 1.49E-06 | 6.35E-05 | -9.66427 |
| 254 min | 0.148   | 0.14    | 0.11975 | 1.5E-06  | 6.35E-05 | -9.66442 |
| 256 min | 0.149   | 0.14125 | 0.121   | 1.51E-06 | 6.35E-05 | -9.66467 |
| 258 min | 0.151   | 0.14375 | 0.1235  | 1.54E-06 | 6.35E-05 | -9.66516 |
| 260 min | 0.15125 | 0.14325 | 0.123   | 1.54E-06 | 6.35E-05 | -9.66506 |
| 262 min | 0.15175 | 0.14375 | 0.1235  | 1.54E-06 | 6.35E-05 | -9.66516 |
| 264 min | 0.15325 | 0.14525 | 0.125   | 1.56E-06 | 6.34E-05 | -9.66546 |
| 266 min | 0.1545  | 0.14625 | 0.126   | 1.58E-06 | 6.34E-05 | -9.66565 |
| 268 min | 0.15475 | 0.14625 | 0.126   | 1.58E-06 | 6.34E-05 | -9.66565 |
| 270 min | 0.15675 | 0.14875 | 0.1285  | 1.61E-06 | 6.34E-05 | -9.66615 |
| 272 min | 0.158   | 0.15    | 0.12975 | 1.62E-06 | 6.34E-05 | -9.66639 |
| 274 min | 0.15875 | 0.149   | 0.12875 | 1.61E-06 | 6.34E-05 | -9.66619 |
| 276 min | 0.16075 | 0.15225 | 0.132   | 1.65E-06 | 6.34E-05 | -9.66684 |
| 278 min | 0.1605  | 0.152   | 0.13175 | 1.65E-06 | 6.34E-05 | -9.66679 |
| 280 min | 0.16225 | 0.1535  | 0.13325 | 1.67E-06 | 6.33E-05 | -9.66708 |
| 282 min | 0.1635  | 0.155   | 0.13475 | 1.68E-06 | 6.33E-05 | -9.66738 |
| 284 min | 0.165   | 0.1565  | 0.13625 | 1.7E-06  | 6.33E-05 | -9.66767 |
| 286 min | 0.166   | 0.15775 | 0.1375  | 1.72E-06 | 6.33E-05 | -9.66792 |
| 288 min | 0.1665  | 0.15775 | 0.1375  | 1.72E-06 | 6.33E-05 | -9.66792 |
| 290 min | 0.167   | 0.1575  | 0.13725 | 1.72E-06 | 6.33E-05 | -9.66787 |
| 292 min | 0.168   | 0.15975 | 0.1395  | 1.74E-06 | 6.33E-05 | -9.66832 |
| 294 min | 0.169   | 0.1605  | 0.14025 | 1.75E-06 | 6.32E-05 | -9.66846 |
| 296 min | 0.1695  | 0.15925 | 0.139   | 1.74E-06 | 6.33E-05 | -9.66822 |
| 298 min | 0.17075 | 0.162   | 0.14175 | 1.77E-06 | 6.32E-05 | -9.66876 |

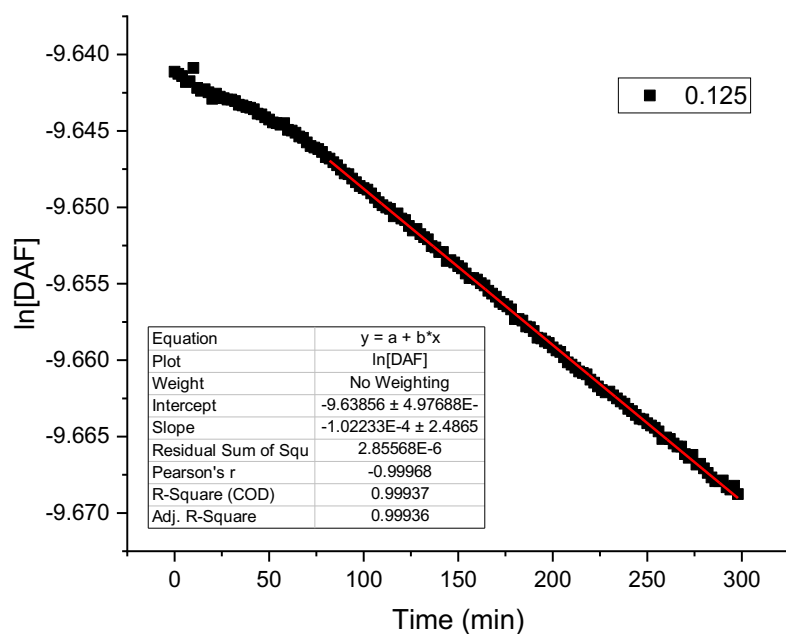

**0.150 mM CoHwCl, 50 mM PBS pH 7, [DAF]=0.065 mM**

| Time (min) | A@490nm | A@490nm minus BK | set to zero | [FLU] (M) | [DAF] (M) | ln[DAF]  |
|------------|---------|------------------|-------------|-----------|-----------|----------|
| 0 min      | 0.0315  | 0.02075          | 0           | 0         | 0.000065  | -9.64112 |
| 2 min      | 0.03075 | 0.0215           | 0.00075     | 9.37E-09  | 6.5E-05   | -9.64127 |
| 4 min      | 0.02975 | 0.02175          | 0.001       | 1.25E-08  | 6.5E-05   | -9.64132 |
| 6 min      | 0.0325  | 0.02475          | 0.004       | 5E-08     | 6.5E-05   | -9.64189 |
| 8 min      | 0.0315  | 0.02375          | 0.003       | 3.75E-08  | 6.5E-05   | -9.6417  |
| 10 min     | 0.032   | 0.02025          | -0.0005     | -6.3E-09  | 6.5E-05   | -9.64103 |
| 12 min     | 0.03225 | 0.0275           | 0.00675     | 8.44E-08  | 6.49E-05  | -9.64242 |
| 14 min     | 0.03275 | 0.0277625        | 0.007013    | 8.77E-08  | 6.49E-05  | -9.64247 |
| 16 min     | 0.032   | 0.0265           | 0.00575     | 7.19E-08  | 6.49E-05  | -9.64223 |
| 18 min     | 0.03275 | 0.02825          | 0.0075      | 9.38E-08  | 6.49E-05  | -9.64257 |
| 20 min     | 0.0335  | 0.03             | 0.00925     | 1.16E-07  | 6.49E-05  | -9.6429  |
| 22 min     | 0.03425 | 0.02925          | 0.0085      | 1.06E-07  | 6.49E-05  | -9.64276 |
| 24 min     | 0.03475 | 0.02975          | 0.009       | 1.13E-07  | 6.49E-05  | -9.64286 |
| 26 min     | 0.035   | 0.03             | 0.00925     | 1.16E-07  | 6.49E-05  | -9.6429  |
| 28 min     | 0.0365  | 0.031            | 0.01025     | 1.28E-07  | 6.49E-05  | -9.6431  |
| 30 min     | 0.03775 | 0.03225          | 0.0115      | 1.44E-07  | 6.49E-05  | -9.64334 |
| 32 min     | 0.03775 | 0.0325           | 0.01175     | 1.47E-07  | 6.49E-05  | -9.64339 |
| 34 min     | 0.0385  | 0.0335           | 0.01275     | 1.59E-07  | 6.48E-05  | -9.64358 |
| 36 min     | 0.04    | 0.03425          | 0.0135      | 1.69E-07  | 6.48E-05  | -9.64372 |
| 38 min     | 0.03925 | 0.034            | 0.01325     | 1.66E-07  | 6.48E-05  | -9.64367 |
| 40 min     | 0.041   | 0.035            | 0.01425     | 1.78E-07  | 6.48E-05  | -9.64387 |
| 42 min     | 0.04225 | 0.03625          | 0.0155      | 1.94E-07  | 6.48E-05  | -9.64411 |
| 44 min     | 0.0425  | 0.037            | 0.01625     | 2.03E-07  | 6.48E-05  | -9.64425 |
| 46 min     | 0.04325 | 0.038            | 0.01725     | 2.16E-07  | 6.48E-05  | -9.64445 |

|         |         |         |         |          |          |          |
|---------|---------|---------|---------|----------|----------|----------|
| 48 min  | 0.04475 | 0.03875 | 0.018   | 2.25E-07 | 6.48E-05 | -9.64459 |
| 50 min  | 0.04525 | 0.04025 | 0.0195  | 2.44E-07 | 6.48E-05 | -9.64488 |
| 52 min  | 0.047   | 0.041   | 0.02025 | 2.53E-07 | 6.47E-05 | -9.64503 |
| 54 min  | 0.0465  | 0.04075 | 0.02    | 2.5E-07  | 6.48E-05 | -9.64498 |
| 56 min  | 0.048   | 0.042   | 0.02125 | 2.66E-07 | 6.47E-05 | -9.64522 |
| 58 min  | 0.0495  | 0.042   | 0.02125 | 2.66E-07 | 6.47E-05 | -9.64522 |
| 60 min  | 0.05    | 0.044   | 0.02325 | 2.91E-07 | 6.47E-05 | -9.6456  |
| 62 min  | 0.0505  | 0.0445  | 0.02375 | 2.97E-07 | 6.47E-05 | -9.6457  |
| 64 min  | 0.05125 | 0.0455  | 0.02475 | 3.09E-07 | 6.47E-05 | -9.64589 |
| 66 min  | 0.05275 | 0.04725 | 0.0265  | 3.31E-07 | 6.47E-05 | -9.64623 |
| 68 min  | 0.05275 | 0.047   | 0.02625 | 3.28E-07 | 6.47E-05 | -9.64618 |
| 70 min  | 0.05525 | 0.049   | 0.02825 | 3.53E-07 | 6.46E-05 | -9.64657 |
| 72 min  | 0.0555  | 0.05    | 0.02925 | 3.66E-07 | 6.46E-05 | -9.64676 |
| 74 min  | 0.058   | 0.0515  | 0.03075 | 3.84E-07 | 6.46E-05 | -9.64705 |
| 76 min  | 0.058   | 0.052   | 0.03125 | 3.91E-07 | 6.46E-05 | -9.64715 |
| 78 min  | 0.0595  | 0.05325 | 0.0325  | 4.06E-07 | 6.46E-05 | -9.64739 |
| 80 min  | 0.06025 | 0.0545  | 0.03375 | 4.22E-07 | 6.46E-05 | -9.64763 |
| 82 min  | 0.06175 | 0.0555  | 0.03475 | 4.34E-07 | 6.46E-05 | -9.64783 |
| 84 min  | 0.06275 | 0.05675 | 0.036   | 4.5E-07  | 6.46E-05 | -9.64807 |
| 86 min  | 0.06375 | 0.058   | 0.03725 | 4.66E-07 | 6.45E-05 | -9.64831 |
| 88 min  | 0.06475 | 0.06    | 0.03925 | 4.91E-07 | 6.45E-05 | -9.6487  |
| 90 min  | 0.06675 | 0.06125 | 0.0405  | 5.06E-07 | 6.45E-05 | -9.64894 |
| 92 min  | 0.06725 | 0.06125 | 0.0405  | 5.06E-07 | 6.45E-05 | -9.64894 |
| 94 min  | 0.068   | 0.06225 | 0.0415  | 5.19E-07 | 6.45E-05 | -9.64914 |
| 96 min  | 0.06925 | 0.06375 | 0.043   | 5.38E-07 | 6.45E-05 | -9.64943 |
| 98 min  | 0.0705  | 0.065   | 0.04425 | 5.53E-07 | 6.44E-05 | -9.64967 |
| 100 min | 0.07125 | 0.0655  | 0.04475 | 5.59E-07 | 6.44E-05 | -9.64977 |
| 102 min | 0.07275 | 0.067   | 0.04625 | 5.78E-07 | 6.44E-05 | -9.65006 |
| 104 min | 0.0745  | 0.068   | 0.04725 | 5.91E-07 | 6.44E-05 | -9.65025 |
| 106 min | 0.07575 | 0.071   | 0.05025 | 6.28E-07 | 6.44E-05 | -9.65083 |
| 108 min | 0.077   | 0.0715  | 0.05075 | 6.34E-07 | 6.44E-05 | -9.65093 |
| 110 min | 0.07775 | 0.0725  | 0.05175 | 6.47E-07 | 6.44E-05 | -9.65113 |
| 112 min | 0.08    | 0.07375 | 0.053   | 6.63E-07 | 6.43E-05 | -9.65137 |
| 114 min | 0.08025 | 0.0745  | 0.05375 | 6.72E-07 | 6.43E-05 | -9.65151 |
| 116 min | 0.0815  | 0.07725 | 0.0565  | 7.06E-07 | 6.43E-05 | -9.65205 |
| 118 min | 0.083   | 0.0775  | 0.05675 | 7.09E-07 | 6.43E-05 | -9.6521  |
| 120 min | 0.0835  | 0.07825 | 0.0575  | 7.19E-07 | 6.43E-05 | -9.65224 |
| 122 min | 0.08575 | 0.07925 | 0.0585  | 7.31E-07 | 6.43E-05 | -9.65244 |
| 124 min | 0.08725 | 0.08125 | 0.0605  | 7.56E-07 | 6.42E-05 | -9.65283 |
| 126 min | 0.08775 | 0.08275 | 0.062   | 7.75E-07 | 6.42E-05 | -9.65312 |
| 128 min | 0.088   | 0.08275 | 0.062   | 7.75E-07 | 6.42E-05 | -9.65312 |
| 130 min | 0.09    | 0.0845  | 0.06375 | 7.97E-07 | 6.42E-05 | -9.65346 |
| 132 min | 0.09025 | 0.0855  | 0.06475 | 8.09E-07 | 6.42E-05 | -9.65365 |
| 134 min | 0.09125 | 0.086   | 0.06525 | 8.16E-07 | 6.42E-05 | -9.65375 |
| 136 min | 0.0945  | 0.0885  | 0.06775 | 8.47E-07 | 6.42E-05 | -9.65424 |
| 138 min | 0.09525 | 0.0895  | 0.06875 | 8.59E-07 | 6.41E-05 | -9.65443 |



|         |         |         |         |          |          |          |
|---------|---------|---------|---------|----------|----------|----------|
| 140 min | 0.09675 | 0.09125 | 0.0705  | 8.81E-07 | 6.41E-05 | -9.65477 |
| 142 min | 0.0975  | 0.092   | 0.07125 | 8.91E-07 | 6.41E-05 | -9.65492 |
| 144 min | 0.10025 | 0.0945  | 0.07375 | 9.22E-07 | 6.41E-05 | -9.65541 |
| 146 min | 0.10075 | 0.095   | 0.07425 | 9.28E-07 | 6.41E-05 | -9.65551 |
| 148 min | 0.10175 | 0.0955  | 0.07475 | 9.34E-07 | 6.41E-05 | -9.6556  |
| 150 min | 0.1025  | 0.097   | 0.07625 | 9.53E-07 | 6.4E-05  | -9.6559  |
| 152 min | 0.10425 | 0.09825 | 0.0775  | 9.69E-07 | 6.4E-05  | -9.65614 |
| 154 min | 0.10575 | 0.09975 | 0.079   | 9.88E-07 | 6.4E-05  | -9.65643 |
| 156 min | 0.107   | 0.101   | 0.08025 | 1E-06    | 6.4E-05  | -9.65668 |
| 158 min | 0.10875 | 0.1025  | 0.08175 | 1.02E-06 | 6.4E-05  | -9.65697 |
| 160 min | 0.10925 | 0.1025  | 0.08175 | 1.02E-06 | 6.4E-05  | -9.65697 |
| 162 min | 0.11125 | 0.1045  | 0.08375 | 1.05E-06 | 6.4E-05  | -9.65736 |
| 164 min | 0.111   | 0.10475 | 0.084   | 1.05E-06 | 6.4E-05  | -9.65741 |
| 166 min | 0.11375 | 0.10725 | 0.0865  | 1.08E-06 | 6.39E-05 | -9.6579  |
| 168 min | 0.11475 | 0.1075  | 0.08675 | 1.08E-06 | 6.39E-05 | -9.65795 |
| 170 min | 0.11625 | 0.10925 | 0.0885  | 1.11E-06 | 6.39E-05 | -9.65829 |
| 172 min | 0.118   | 0.1115  | 0.09075 | 1.13E-06 | 6.39E-05 | -9.65873 |
| 174 min | 0.1185  | 0.11175 | 0.091   | 1.14E-06 | 6.39E-05 | -9.65878 |
| 176 min | 0.11925 | 0.1125  | 0.09175 | 1.15E-06 | 6.39E-05 | -9.65893 |
| 178 min | 0.12075 | 0.114   | 0.09325 | 1.17E-06 | 6.38E-05 | -9.65922 |
| 180 min | 0.123   | 0.1175  | 0.09675 | 1.21E-06 | 6.38E-05 | -9.6599  |
| 182 min | 0.12375 | 0.11725 | 0.0965  | 1.21E-06 | 6.38E-05 | -9.65986 |
| 184 min | 0.1245  | 0.11825 | 0.0975  | 1.22E-06 | 6.38E-05 | -9.66005 |
| 186 min | 0.12725 | 0.121   | 0.10025 | 1.25E-06 | 6.37E-05 | -9.66059 |
| 188 min | 0.1275  | 0.121   | 0.10025 | 1.25E-06 | 6.37E-05 | -9.66059 |
| 190 min | 0.129   | 0.12275 | 0.102   | 1.28E-06 | 6.37E-05 | -9.66093 |
| 192 min | 0.13    | 0.12425 | 0.1035  | 1.29E-06 | 6.37E-05 | -9.66123 |
| 194 min | 0.1315  | 0.125   | 0.10425 | 1.3E-06  | 6.37E-05 | -9.66138 |
| 196 min | 0.133   | 0.12625 | 0.1055  | 1.32E-06 | 6.37E-05 | -9.66162 |
| 198 min | 0.1345  | 0.12725 | 0.1065  | 1.33E-06 | 6.37E-05 | -9.66182 |
| 200 min | 0.1355  | 0.1285  | 0.10775 | 1.35E-06 | 6.37E-05 | -9.66206 |
| 202 min | 0.1365  | 0.13    | 0.10925 | 1.37E-06 | 6.36E-05 | -9.66236 |
| 204 min | 0.13775 | 0.131   | 0.11025 | 1.38E-06 | 6.36E-05 | -9.66255 |
| 206 min | 0.13875 | 0.13225 | 0.1115  | 1.39E-06 | 6.36E-05 | -9.6628  |
| 208 min | 0.1405  | 0.13375 | 0.113   | 1.41E-06 | 6.36E-05 | -9.66309 |
| 210 min | 0.141   | 0.135   | 0.11425 | 1.43E-06 | 6.36E-05 | -9.66334 |
| 212 min | 0.14325 | 0.1365  | 0.11575 | 1.45E-06 | 6.36E-05 | -9.66363 |
| 214 min | 0.14275 | 0.13725 | 0.1165  | 1.46E-06 | 6.35E-05 | -9.66378 |
| 216 min | 0.145   | 0.13775 | 0.117   | 1.46E-06 | 6.35E-05 | -9.66388 |
| 218 min | 0.14625 | 0.1395  | 0.11875 | 1.48E-06 | 6.35E-05 | -9.66422 |
| 220 min | 0.147   | 0.1405  | 0.11975 | 1.5E-06  | 6.35E-05 | -9.66442 |
| 222 min | 0.1485  | 0.14175 | 0.121   | 1.51E-06 | 6.35E-05 | -9.66467 |
| 224 min | 0.1495  | 0.14275 | 0.122   | 1.53E-06 | 6.35E-05 | -9.66486 |
| 226 min | 0.151   | 0.14375 | 0.123   | 1.54E-06 | 6.35E-05 | -9.66506 |
| 228 min | 0.153   | 0.146   | 0.12525 | 1.57E-06 | 6.34E-05 | -9.6655  |
| 230 min | 0.15275 | 0.14575 | 0.125   | 1.56E-06 | 6.34E-05 | -9.66546 |

|         |         |         |         |          |          |          |
|---------|---------|---------|---------|----------|----------|----------|
| 232 min | 0.153   | 0.1465  | 0.12575 | 1.57E-06 | 6.34E-05 | -9.6656  |
| 234 min | 0.15525 | 0.14825 | 0.1275  | 1.59E-06 | 6.34E-05 | -9.66595 |
| 236 min | 0.157   | 0.14925 | 0.1285  | 1.61E-06 | 6.34E-05 | -9.66615 |
| 238 min | 0.1575  | 0.1495  | 0.12875 | 1.61E-06 | 6.34E-05 | -9.66619 |
| 240 min | 0.1585  | 0.15125 | 0.1305  | 1.63E-06 | 6.34E-05 | -9.66654 |
| 242 min | 0.1605  | 0.15275 | 0.132   | 1.65E-06 | 6.34E-05 | -9.66684 |
| 244 min | 0.162   | 0.154   | 0.13325 | 1.67E-06 | 6.33E-05 | -9.66708 |
| 246 min | 0.16325 | 0.155   | 0.13425 | 1.68E-06 | 6.33E-05 | -9.66728 |
| 248 min | 0.16175 | 0.155   | 0.13425 | 1.68E-06 | 6.33E-05 | -9.66728 |
| 250 min | 0.16475 | 0.1565  | 0.13575 | 1.7E-06  | 6.33E-05 | -9.66758 |
| 252 min | 0.16575 | 0.1575  | 0.13675 | 1.71E-06 | 6.33E-05 | -9.66777 |
| 254 min | 0.1665  | 0.1585  | 0.13775 | 1.72E-06 | 6.33E-05 | -9.66797 |
| 256 min | 0.1685  | 0.16075 | 0.14    | 1.75E-06 | 6.33E-05 | -9.66842 |
| 258 min | 0.169   | 0.16175 | 0.141   | 1.76E-06 | 6.32E-05 | -9.66861 |
| 260 min | 0.17025 | 0.16225 | 0.1415  | 1.77E-06 | 6.32E-05 | -9.66871 |
| 262 min | 0.17175 | 0.16375 | 0.143   | 1.79E-06 | 6.32E-05 | -9.66901 |
| 264 min | 0.1725  | 0.1645  | 0.14375 | 1.8E-06  | 6.32E-05 | -9.66916 |
| 266 min | 0.17425 | 0.166   | 0.14525 | 1.82E-06 | 6.32E-05 | -9.66945 |
| 268 min | 0.175   | 0.1665  | 0.14575 | 1.82E-06 | 6.32E-05 | -9.66955 |
| 270 min | 0.177   | 0.169   | 0.14825 | 1.85E-06 | 6.31E-05 | -9.67005 |
| 272 min | 0.17675 | 0.16875 | 0.148   | 1.85E-06 | 6.32E-05 | -9.67    |
| 274 min | 0.17875 | 0.169   | 0.14825 | 1.85E-06 | 6.31E-05 | -9.67005 |
| 276 min | 0.18075 | 0.17225 | 0.1515  | 1.89E-06 | 6.31E-05 | -9.67069 |
| 278 min | 0.181   | 0.1725  | 0.15175 | 1.9E-06  | 6.31E-05 | -9.67074 |
| 280 min | 0.1825  | 0.17375 | 0.153   | 1.91E-06 | 6.31E-05 | -9.67099 |
| 282 min | 0.18325 | 0.17475 | 0.154   | 1.93E-06 | 6.31E-05 | -9.67119 |
| 284 min | 0.184   | 0.1755  | 0.15475 | 1.93E-06 | 6.31E-05 | -9.67133 |
| 286 min | 0.18525 | 0.177   | 0.15625 | 1.95E-06 | 6.3E-05  | -9.67163 |
| 288 min | 0.18625 | 0.1775  | 0.15675 | 1.96E-06 | 6.3E-05  | -9.67173 |
| 290 min | 0.187   | 0.1775  | 0.15675 | 1.96E-06 | 6.3E-05  | -9.67173 |
| 292 min | 0.189   | 0.18075 | 0.16    | 0.000002 | 0.000063 | -9.67238 |
| 294 min | 0.189   | 0.1805  | 0.15975 | 2E-06    | 6.3E-05  | -9.67233 |
| 296 min | 0.19025 | 0.18    | 0.15925 | 1.99E-06 | 6.3E-05  | -9.67223 |
| 298 min | 0.1915  | 0.18275 | 0.162   | 2.03E-06 | 6.3E-05  | -9.67277 |

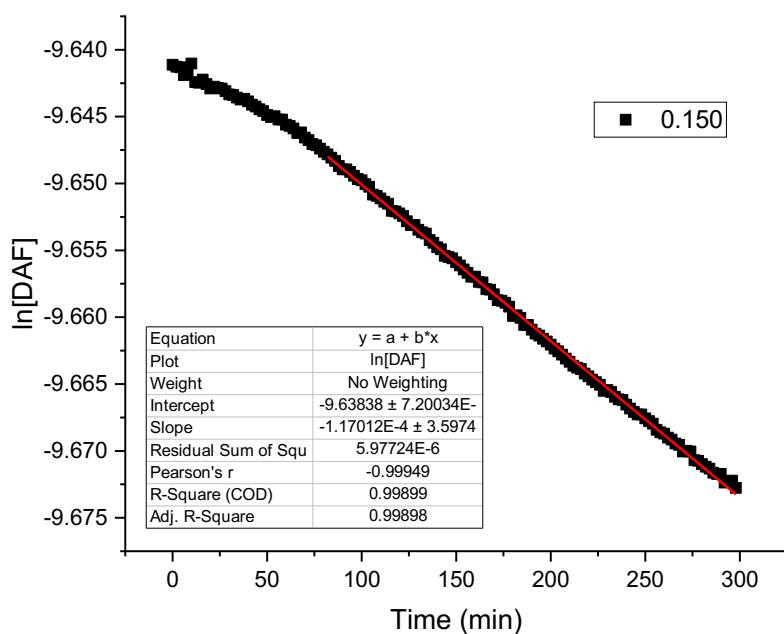

Catalysis of **DAF** to **FLU** in the presence of **CoH<sup>w</sup>BF<sub>4</sub>** and various anions (0.25 mM **DAF**, 5 mM anion, 50 mM pH 7 **PBS** buffer, 0.1 mM **CoH<sup>w</sup>BF<sub>4</sub>**)

Catalysis of **DAF** to **FLU** in the presence of cage (0.25 mM **DAF**, 50 mM pH 7 **PBS** buffer, 0.1 mM **CoH<sup>w</sup>BF<sub>4</sub>**)

| Time (min) | A@490nm | [FLU] (M) | [DAF] (M) | ln[DAF]  |
|------------|---------|-----------|-----------|----------|
| 0          | 0       | 0         | 0.00025   | -8.29405 |
| 2          | 0.00475 | 5.94E-08  | 0.0002499 | -8.29429 |
| 4          | 0.0055  | 6.88E-08  | 0.0002499 | -8.29432 |
| 6          | 0.005   | 6.25E-08  | 0.0002499 | -8.2943  |
| 8          | 0.0055  | 6.88E-08  | 0.0002499 | -8.29432 |
| 10         | 0.00475 | 5.94E-08  | 0.0002499 | -8.29429 |
| 12         | 0.00575 | 7.19E-08  | 0.0002499 | -8.29434 |
| 14         | 0.00175 | 2.19E-08  | 0.00025   | -8.29414 |
| 16         | 0.00775 | 9.69E-08  | 0.0002499 | -8.29444 |
| 18         | 0.00575 | 7.19E-08  | 0.0002499 | -8.29434 |
| 20         | 0.00625 | 7.81E-08  | 0.0002499 | -8.29436 |
| 22         | 0.01075 | 1.34E-07  | 0.0002499 | -8.29459 |
| 24         | 0.0055  | 6.88E-08  | 0.0002499 | -8.29432 |
| 26         | 0.0085  | 1.06E-07  | 0.0002499 | -8.29447 |
| 28         | 0.01175 | 1.47E-07  | 0.0002499 | -8.29464 |
| 30         | 0.00975 | 1.22E-07  | 0.0002499 | -8.29454 |
| 32         | 0.0105  | 1.31E-07  | 0.0002499 | -8.29457 |
| 34         | 0.01    | 1.25E-07  | 0.0002499 | -8.29455 |
| 36         | 0.0115  | 1.44E-07  | 0.0002499 | -8.29462 |

|     |         |          |           |          |
|-----|---------|----------|-----------|----------|
| 38  | 0.01175 | 1.47E-07 | 0.0002499 | -8.29464 |
| 40  | 0.0125  | 1.56E-07 | 0.0002498 | -8.29467 |
| 42  | 0.0115  | 1.44E-07 | 0.0002499 | -8.29462 |
| 44  | 0.0135  | 1.69E-07 | 0.0002498 | -8.29472 |
| 46  | 0.014   | 1.75E-07 | 0.0002498 | -8.29475 |
| 48  | 0.01475 | 1.84E-07 | 0.0002498 | -8.29479 |
| 50  | 0.01625 | 2.03E-07 | 0.0002498 | -8.29486 |
| 52  | 0.01975 | 2.47E-07 | 0.0002498 | -8.29504 |
| 54  | 0.02075 | 2.59E-07 | 0.0002497 | -8.29509 |
| 56  | 0.01825 | 2.28E-07 | 0.0002498 | -8.29496 |
| 58  | 0.01825 | 2.28E-07 | 0.0002498 | -8.29496 |
| 60  | 0.02    | 2.5E-07  | 0.0002498 | -8.29505 |
| 62  | 0.0235  | 2.94E-07 | 0.0002497 | -8.29523 |
| 64  | 0.0215  | 2.69E-07 | 0.0002497 | -8.29513 |
| 66  | 0.0225  | 2.81E-07 | 0.0002497 | -8.29518 |
| 68  | 0.024   | 3E-07    | 0.0002497 | -8.29525 |
| 70  | 0.02425 | 3.03E-07 | 0.0002497 | -8.29526 |
| 72  | 0.02575 | 3.22E-07 | 0.0002497 | -8.29534 |
| 74  | 0.02775 | 3.47E-07 | 0.0002497 | -8.29544 |
| 76  | 0.02925 | 3.66E-07 | 0.0002496 | -8.29551 |
| 78  | 0.027   | 3.38E-07 | 0.0002497 | -8.2954  |
| 80  | 0.03    | 3.75E-07 | 0.0002496 | -8.29555 |
| 82  | 0.03825 | 4.78E-07 | 0.0002495 | -8.29596 |
| 84  | 0.03225 | 4.03E-07 | 0.0002496 | -8.29566 |
| 86  | 0.0345  | 4.31E-07 | 0.0002496 | -8.29578 |
| 88  | 0.034   | 4.25E-07 | 0.0002496 | -8.29575 |
| 90  | 0.037   | 4.63E-07 | 0.0002495 | -8.2959  |
| 92  | 0.04475 | 5.59E-07 | 0.0002494 | -8.29629 |
| 94  | 0.037   | 4.63E-07 | 0.0002495 | -8.2959  |
| 96  | 0.04025 | 5.03E-07 | 0.0002495 | -8.29606 |
| 98  | 0.04025 | 5.03E-07 | 0.0002495 | -8.29606 |
| 100 | 0.04325 | 5.41E-07 | 0.0002495 | -8.29621 |
| 102 | 0.04275 | 5.34E-07 | 0.0002495 | -8.29619 |
| 104 | 0.04525 | 5.66E-07 | 0.0002494 | -8.29631 |
| 106 | 0.04625 | 5.78E-07 | 0.0002494 | -8.29636 |
| 108 | 0.04575 | 5.72E-07 | 0.0002494 | -8.29634 |
| 110 | 0.05    | 6.25E-07 | 0.0002494 | -8.29655 |
| 112 | 0.04875 | 6.09E-07 | 0.0002494 | -8.29649 |
| 114 | 0.05075 | 6.34E-07 | 0.0002494 | -8.29659 |
| 116 | 0.053   | 6.63E-07 | 0.0002493 | -8.2967  |
| 118 | 0.05225 | 6.53E-07 | 0.0002493 | -8.29667 |
| 120 | 0.055   | 6.88E-07 | 0.0002493 | -8.2968  |
| 122 | 0.057   | 7.13E-07 | 0.0002493 | -8.2969  |
| 124 | 0.06125 | 7.66E-07 | 0.0002492 | -8.29712 |
| 126 | 0.06    | 7.5E-07  | 0.0002493 | -8.29705 |
| 128 | 0.0605  | 7.56E-07 | 0.0002492 | -8.29708 |

|     |         |          |           |          |
|-----|---------|----------|-----------|----------|
| 130 | 0.06125 | 7.66E-07 | 0.0002492 | -8.29712 |
| 132 | 0.0655  | 8.19E-07 | 0.0002492 | -8.29733 |
| 134 | 0.07075 | 8.84E-07 | 0.0002491 | -8.29759 |
| 136 | 0.06725 | 8.41E-07 | 0.0002492 | -8.29742 |
| 138 | 0.0665  | 8.31E-07 | 0.0002492 | -8.29738 |
| 140 | 0.06975 | 8.72E-07 | 0.0002491 | -8.29754 |
| 142 | 0.07175 | 8.97E-07 | 0.0002491 | -8.29764 |
| 144 | 0.07425 | 9.28E-07 | 0.0002491 | -8.29777 |
| 146 | 0.0735  | 9.19E-07 | 0.0002491 | -8.29773 |
| 148 | 0.0775  | 9.69E-07 | 0.000249  | -8.29793 |
| 150 | 0.07625 | 9.53E-07 | 0.000249  | -8.29787 |
| 152 | 0.07875 | 9.84E-07 | 0.000249  | -8.29799 |
| 154 | 0.08025 | 1E-06    | 0.000249  | -8.29807 |
| 156 | 0.0815  | 1.02E-06 | 0.000249  | -8.29813 |
| 158 | 0.082   | 1.03E-06 | 0.000249  | -8.29816 |
| 160 | 0.08325 | 1.04E-06 | 0.000249  | -8.29822 |
| 162 | 0.08425 | 1.05E-06 | 0.0002489 | -8.29827 |
| 164 | 0.0865  | 1.08E-06 | 0.0002489 | -8.29838 |
| 166 | 0.0885  | 1.11E-06 | 0.0002489 | -8.29848 |
| 168 | 0.0885  | 1.11E-06 | 0.0002489 | -8.29848 |
| 170 | 0.0915  | 1.14E-06 | 0.0002489 | -8.29864 |
| 172 | 0.09175 | 1.15E-06 | 0.0002489 | -8.29865 |
| 174 | 0.094   | 1.18E-06 | 0.0002488 | -8.29876 |
| 176 | 0.09525 | 1.19E-06 | 0.0002488 | -8.29882 |
| 178 | 0.097   | 1.21E-06 | 0.0002488 | -8.29891 |
| 180 | 0.09975 | 1.25E-06 | 0.0002488 | -8.29905 |
| 182 | 0.1005  | 1.26E-06 | 0.0002487 | -8.29909 |
| 184 | 0.102   | 1.28E-06 | 0.0002487 | -8.29916 |
| 186 | 0.10325 | 1.29E-06 | 0.0002487 | -8.29923 |
| 188 | 0.105   | 1.31E-06 | 0.0002487 | -8.29931 |
| 190 | 0.1035  | 1.29E-06 | 0.0002487 | -8.29924 |
| 192 | 0.10925 | 1.37E-06 | 0.0002486 | -8.29953 |
| 194 | 0.10975 | 1.37E-06 | 0.0002486 | -8.29955 |
| 196 | 0.11075 | 1.38E-06 | 0.0002486 | -8.2996  |
| 198 | 0.11175 | 1.4E-06  | 0.0002486 | -8.29965 |
| 200 | 0.113   | 1.41E-06 | 0.0002486 | -8.29972 |
| 202 | 0.11625 | 1.45E-06 | 0.0002485 | -8.29988 |
| 204 | 0.117   | 1.46E-06 | 0.0002485 | -8.29992 |
| 206 | 0.118   | 1.48E-06 | 0.0002485 | -8.29997 |
| 208 | 0.12    | 1.5E-06  | 0.0002485 | -8.30007 |
| 210 | 0.12125 | 1.52E-06 | 0.0002485 | -8.30013 |
| 212 | 0.1235  | 1.54E-06 | 0.0002485 | -8.30024 |
| 214 | 0.12475 | 1.56E-06 | 0.0002484 | -8.30031 |
| 216 | 0.1265  | 1.58E-06 | 0.0002484 | -8.30039 |
| 218 | 0.128   | 1.6E-06  | 0.0002484 | -8.30047 |
| 220 | 0.12875 | 1.61E-06 | 0.0002484 | -8.30051 |

|     |         |          |           |          |
|-----|---------|----------|-----------|----------|
| 222 | 0.1305  | 1.63E-06 | 0.0002484 | -8.3006  |
| 224 | 0.133   | 1.66E-06 | 0.0002483 | -8.30072 |
| 226 | 0.13475 | 1.68E-06 | 0.0002483 | -8.30081 |
| 228 | 0.13375 | 1.67E-06 | 0.0002483 | -8.30076 |
| 230 | 0.138   | 1.73E-06 | 0.0002483 | -8.30097 |
| 232 | 0.14    | 1.75E-06 | 0.0002483 | -8.30107 |
| 234 | 0.1405  | 1.76E-06 | 0.0002482 | -8.3011  |
| 236 | 0.14125 | 1.77E-06 | 0.0002482 | -8.30114 |
| 238 | 0.1435  | 1.79E-06 | 0.0002482 | -8.30125 |
| 240 | 0.145   | 1.81E-06 | 0.0002482 | -8.30133 |
| 242 | 0.14625 | 1.83E-06 | 0.0002482 | -8.30139 |
| 244 | 0.148   | 1.85E-06 | 0.0002482 | -8.30148 |
| 246 | 0.14975 | 1.87E-06 | 0.0002481 | -8.30157 |
| 248 | 0.151   | 1.89E-06 | 0.0002481 | -8.30163 |
| 250 | 0.15225 | 1.9E-06  | 0.0002481 | -8.30169 |
| 252 | 0.1535  | 1.92E-06 | 0.0002481 | -8.30175 |
| 254 | 0.156   | 1.95E-06 | 0.0002481 | -8.30188 |
| 256 | 0.156   | 1.95E-06 | 0.0002481 | -8.30188 |
| 258 | 0.15875 | 1.98E-06 | 0.000248  | -8.30202 |
| 260 | 0.1595  | 1.99E-06 | 0.000248  | -8.30206 |
| 262 | 0.162   | 2.03E-06 | 0.000248  | -8.30218 |
| 264 | 0.16325 | 2.04E-06 | 0.000248  | -8.30225 |
| 266 | 0.1645  | 2.06E-06 | 0.0002479 | -8.30231 |
| 268 | 0.1665  | 2.08E-06 | 0.0002479 | -8.30241 |
| 270 | 0.169   | 2.11E-06 | 0.0002479 | -8.30254 |
| 272 | 0.1685  | 2.11E-06 | 0.0002479 | -8.30251 |
| 274 | 0.1715  | 2.14E-06 | 0.0002479 | -8.30266 |
| 276 | 0.17    | 2.13E-06 | 0.0002479 | -8.30259 |
| 278 | 0.1735  | 2.17E-06 | 0.0002478 | -8.30276 |
| 280 | 0.1745  | 2.18E-06 | 0.0002478 | -8.30281 |
| 282 | 0.1755  | 2.19E-06 | 0.0002478 | -8.30286 |
| 284 | 0.17775 | 2.22E-06 | 0.0002478 | -8.30298 |
| 286 | 0.17775 | 2.22E-06 | 0.0002478 | -8.30298 |
| 288 | 0.18125 | 2.27E-06 | 0.0002477 | -8.30315 |
| 290 | 0.18325 | 2.29E-06 | 0.0002477 | -8.30325 |
| 292 | 0.18425 | 2.3E-06  | 0.0002477 | -8.3033  |
| 294 | 0.188   | 2.35E-06 | 0.0002477 | -8.30349 |
| 296 | 0.1875  | 2.34E-06 | 0.0002477 | -8.30347 |
| 298 | 0.19    | 2.38E-06 | 0.0002476 | -8.3036  |

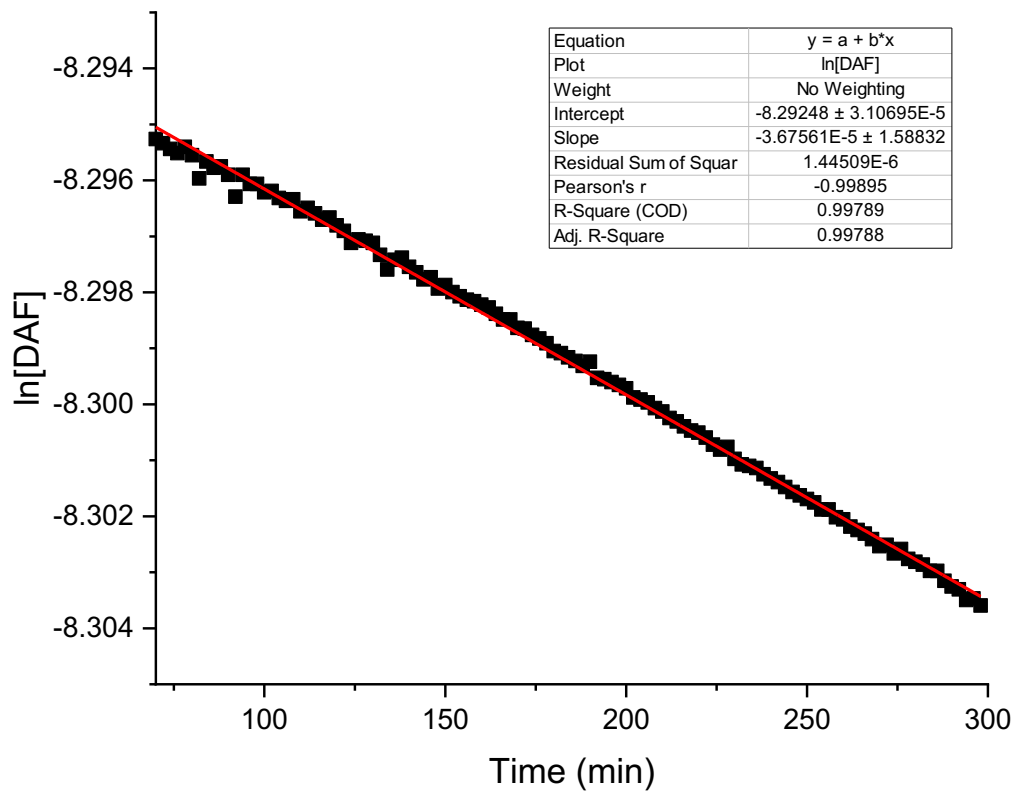

Catalysis of **DAF** to **FLU** in the presence of cage and **5 mM NaF** (0.25 mM **DAF**, 50 mM pH 7 **PBS** buffer, 0.1 mM **CoH<sup>w</sup>BF<sub>4</sub>**)

| Time (min) | A@490nm | set to 0 | [FLU] (M) | [DAF] (M) | ln[DAF]  |
|------------|---------|----------|-----------|-----------|----------|
| 0          | 0.0225  | 0        | 0         | 0.00025   | -8.29405 |
| 2          | 0.0315  | 0.009    | 1.13E-07  | 0.00025   | -8.2945  |
| 4          | 0.03    | 0.0075   | 9.38E-08  | 0.00025   | -8.29442 |
| 6          | 0.0355  | 0.013    | 1.63E-07  | 0.00025   | -8.2947  |
| 8          | 0.0325  | 0.01     | 1.25E-07  | 0.00025   | -8.29455 |
| 10         | 0.0345  | 0.012    | 1.5E-07   | 0.00025   | -8.29465 |
| 12         | 0.037   | 0.0145   | 1.81E-07  | 0.00025   | -8.29477 |
| 14         | 0.03175 | 0.00925  | 1.16E-07  | 0.00025   | -8.29451 |
| 16         | 0.03625 | 0.01375  | 1.72E-07  | 0.00025   | -8.29474 |
| 18         | 0.038   | 0.0155   | 1.94E-07  | 0.00025   | -8.29482 |
| 20         | 0.0395  | 0.017    | 2.13E-07  | 0.00025   | -8.2949  |
| 22         | 0.0425  | 0.02     | 2.5E-07   | 0.00025   | -8.29505 |
| 24         | 0.0445  | 0.022    | 2.75E-07  | 0.00025   | -8.29515 |
| 26         | 0.0435  | 0.021    | 2.63E-07  | 0.00025   | -8.2951  |
| 28         | 0.04625 | 0.02375  | 2.97E-07  | 0.00025   | -8.29524 |
| 30         | 0.0455  | 0.023    | 2.88E-07  | 0.00025   | -8.2952  |
| 32         | 0.04675 | 0.02425  | 3.03E-07  | 0.00025   | -8.29526 |
| 34         | 0.04825 | 0.02575  | 3.22E-07  | 0.00025   | -8.29534 |
| 36         | 0.052   | 0.0295   | 3.69E-07  | 0.00025   | -8.29553 |
| 38         | 0.05175 | 0.02925  | 3.66E-07  | 0.00025   | -8.29551 |
| 40         | 0.05275 | 0.03025  | 3.78E-07  | 0.00025   | -8.29556 |
| 42         | 0.05575 | 0.03325  | 4.16E-07  | 0.00025   | -8.29571 |
| 44         | 0.058   | 0.0355   | 4.44E-07  | 0.00025   | -8.29583 |
| 46         | 0.05875 | 0.03625  | 4.53E-07  | 0.00025   | -8.29586 |
| 48         | 0.05975 | 0.03725  | 4.66E-07  | 0.00025   | -8.29591 |
| 50         | 0.06525 | 0.04275  | 5.34E-07  | 0.000249  | -8.29619 |
| 52         | 0.0655  | 0.043    | 5.38E-07  | 0.000249  | -8.2962  |
| 54         | 0.06875 | 0.04625  | 5.78E-07  | 0.000249  | -8.29636 |
| 56         | 0.067   | 0.0445   | 5.56E-07  | 0.000249  | -8.29628 |
| 58         | 0.0705  | 0.048    | 6E-07     | 0.000249  | -8.29645 |
| 60         | 0.071   | 0.0485   | 6.06E-07  | 0.000249  | -8.29648 |
| 62         | 0.077   | 0.0545   | 6.81E-07  | 0.000249  | -8.29678 |
| 64         | 0.07475 | 0.05225  | 6.53E-07  | 0.000249  | -8.29667 |
| 66         | 0.07775 | 0.05525  | 6.91E-07  | 0.000249  | -8.29682 |
| 68         | 0.08    | 0.0575   | 7.19E-07  | 0.000249  | -8.29693 |
| 70         | 0.08425 | 0.06175  | 7.72E-07  | 0.000249  | -8.29714 |
| 72         | 0.08375 | 0.06125  | 7.66E-07  | 0.000249  | -8.29712 |
| 74         | 0.08675 | 0.06425  | 8.03E-07  | 0.000249  | -8.29727 |
| 76         | 0.08975 | 0.06725  | 8.41E-07  | 0.000249  | -8.29742 |
| 78         | 0.09025 | 0.06775  | 8.47E-07  | 0.000249  | -8.29744 |



|     |         |         |          |          |          |
|-----|---------|---------|----------|----------|----------|
| 80  | 0.09325 | 0.07075 | 8.84E-07 | 0.000249 | -8.29759 |
| 82  | 0.09975 | 0.07725 | 9.66E-07 | 0.000249 | -8.29792 |
| 84  | 0.10075 | 0.07825 | 9.78E-07 | 0.000249 | -8.29797 |
| 86  | 0.0995  | 0.077   | 9.63E-07 | 0.000249 | -8.29791 |
| 88  | 0.102   | 0.0795  | 9.94E-07 | 0.000249 | -8.29803 |
| 90  | 0.1035  | 0.081   | 1.01E-06 | 0.000249 | -8.29811 |
| 92  | 0.10625 | 0.08375 | 1.05E-06 | 0.000249 | -8.29825 |
| 94  | 0.10725 | 0.08475 | 1.06E-06 | 0.000249 | -8.2983  |
| 96  | 0.111   | 0.0885  | 1.11E-06 | 0.000249 | -8.29848 |
| 98  | 0.1125  | 0.09    | 1.13E-06 | 0.000249 | -8.29856 |
| 100 | 0.11525 | 0.09275 | 1.16E-06 | 0.000249 | -8.2987  |
| 102 | 0.11875 | 0.09625 | 1.2E-06  | 0.000249 | -8.29887 |
| 104 | 0.12075 | 0.09825 | 1.23E-06 | 0.000249 | -8.29897 |
| 106 | 0.124   | 0.1015  | 1.27E-06 | 0.000249 | -8.29914 |
| 108 | 0.1235  | 0.101   | 1.26E-06 | 0.000249 | -8.29911 |
| 110 | 0.12725 | 0.10475 | 1.31E-06 | 0.000249 | -8.2993  |
| 112 | 0.12925 | 0.10675 | 1.33E-06 | 0.000249 | -8.2994  |
| 114 | 0.13175 | 0.10925 | 1.37E-06 | 0.000249 | -8.29953 |
| 116 | 0.1345  | 0.112   | 1.4E-06  | 0.000249 | -8.29967 |
| 118 | 0.135   | 0.1125  | 1.41E-06 | 0.000249 | -8.29969 |
| 120 | 0.13925 | 0.11675 | 1.46E-06 | 0.000249 | -8.2999  |
| 122 | 0.141   | 0.1185  | 1.48E-06 | 0.000249 | -8.29999 |
| 124 | 0.1435  | 0.121   | 1.51E-06 | 0.000248 | -8.30012 |
| 126 | 0.147   | 0.1245  | 1.56E-06 | 0.000248 | -8.30029 |
| 128 | 0.1475  | 0.125   | 1.56E-06 | 0.000248 | -8.30032 |
| 130 | 0.1515  | 0.129   | 1.61E-06 | 0.000248 | -8.30052 |
| 132 | 0.1535  | 0.131   | 1.64E-06 | 0.000248 | -8.30062 |
| 134 | 0.1565  | 0.134   | 1.68E-06 | 0.000248 | -8.30077 |
| 136 | 0.15975 | 0.13725 | 1.72E-06 | 0.000248 | -8.30094 |
| 138 | 0.162   | 0.1395  | 1.74E-06 | 0.000248 | -8.30105 |
| 140 | 0.16425 | 0.14175 | 1.77E-06 | 0.000248 | -8.30116 |
| 142 | 0.16675 | 0.14425 | 1.8E-06  | 0.000248 | -8.30129 |
| 144 | 0.1695  | 0.147   | 1.84E-06 | 0.000248 | -8.30143 |
| 146 | 0.172   | 0.1495  | 1.87E-06 | 0.000248 | -8.30155 |
| 148 | 0.1745  | 0.152   | 1.9E-06  | 0.000248 | -8.30168 |
| 150 | 0.17775 | 0.15525 | 1.94E-06 | 0.000248 | -8.30184 |
| 152 | 0.18    | 0.1575  | 1.97E-06 | 0.000248 | -8.30196 |
| 154 | 0.185   | 0.1625  | 2.03E-06 | 0.000248 | -8.30221 |
| 156 | 0.18425 | 0.16175 | 2.02E-06 | 0.000248 | -8.30217 |
| 158 | 0.1865  | 0.164   | 2.05E-06 | 0.000248 | -8.30228 |
| 160 | 0.189   | 0.1665  | 2.08E-06 | 0.000248 | -8.30241 |
| 162 | 0.19075 | 0.16825 | 2.1E-06  | 0.000248 | -8.3025  |
| 164 | 0.19425 | 0.17175 | 2.15E-06 | 0.000248 | -8.30267 |
| 166 | 0.19575 | 0.17325 | 2.17E-06 | 0.000248 | -8.30275 |
| 168 | 0.19875 | 0.17625 | 2.2E-06  | 0.000248 | -8.3029  |
| 170 | 0.20225 | 0.17975 | 2.25E-06 | 0.000248 | -8.30308 |

|     |         |         |          |          |          |
|-----|---------|---------|----------|----------|----------|
| 172 | 0.2055  | 0.183   | 2.29E-06 | 0.000248 | -8.30324 |
| 174 | 0.2085  | 0.186   | 2.33E-06 | 0.000248 | -8.30339 |
| 176 | 0.20975 | 0.18725 | 2.34E-06 | 0.000248 | -8.30346 |
| 178 | 0.21275 | 0.19025 | 2.38E-06 | 0.000248 | -8.30361 |
| 180 | 0.21475 | 0.19225 | 2.4E-06  | 0.000248 | -8.30371 |
| 182 | 0.21775 | 0.19525 | 2.44E-06 | 0.000248 | -8.30386 |
| 184 | 0.2205  | 0.198   | 2.48E-06 | 0.000248 | -8.304   |
| 186 | 0.224   | 0.2015  | 2.52E-06 | 0.000247 | -8.30418 |
| 188 | 0.2285  | 0.206   | 2.58E-06 | 0.000247 | -8.3044  |
| 190 | 0.22775 | 0.20525 | 2.57E-06 | 0.000247 | -8.30437 |
| 192 | 0.23275 | 0.21025 | 2.63E-06 | 0.000247 | -8.30462 |
| 194 | 0.233   | 0.2105  | 2.63E-06 | 0.000247 | -8.30463 |
| 196 | 0.235   | 0.2125  | 2.66E-06 | 0.000247 | -8.30473 |
| 198 | 0.2415  | 0.219   | 2.74E-06 | 0.000247 | -8.30506 |
| 200 | 0.2405  | 0.218   | 2.73E-06 | 0.000247 | -8.30501 |
| 202 | 0.2445  | 0.222   | 2.78E-06 | 0.000247 | -8.30521 |
| 204 | 0.24575 | 0.22325 | 2.79E-06 | 0.000247 | -8.30527 |
| 206 | 0.24825 | 0.22575 | 2.82E-06 | 0.000247 | -8.3054  |
| 208 | 0.252   | 0.2295  | 2.87E-06 | 0.000247 | -8.30559 |
| 210 | 0.25175 | 0.22925 | 2.87E-06 | 0.000247 | -8.30558 |
| 212 | 0.257   | 0.2345  | 2.93E-06 | 0.000247 | -8.30584 |
| 214 | 0.25925 | 0.23675 | 2.96E-06 | 0.000247 | -8.30596 |
| 216 | 0.262   | 0.2395  | 2.99E-06 | 0.000247 | -8.3061  |
| 218 | 0.26375 | 0.24125 | 3.02E-06 | 0.000247 | -8.30619 |
| 220 | 0.268   | 0.2455  | 3.07E-06 | 0.000247 | -8.3064  |
| 222 | 0.26925 | 0.24675 | 3.08E-06 | 0.000247 | -8.30646 |
| 224 | 0.2725  | 0.25    | 3.13E-06 | 0.000247 | -8.30663 |
| 226 | 0.273   | 0.2505  | 3.13E-06 | 0.000247 | -8.30665 |
| 228 | 0.276   | 0.2535  | 3.17E-06 | 0.000247 | -8.30681 |
| 230 | 0.279   | 0.2565  | 3.21E-06 | 0.000247 | -8.30696 |
| 232 | 0.28175 | 0.25925 | 3.24E-06 | 0.000247 | -8.3071  |
| 234 | 0.28425 | 0.26175 | 3.27E-06 | 0.000247 | -8.30722 |
| 236 | 0.28775 | 0.26525 | 3.32E-06 | 0.000247 | -8.3074  |
| 238 | 0.29375 | 0.27125 | 3.39E-06 | 0.000247 | -8.3077  |
| 240 | 0.29225 | 0.26975 | 3.37E-06 | 0.000247 | -8.30763 |
| 242 | 0.29525 | 0.27275 | 3.41E-06 | 0.000247 | -8.30778 |
| 244 | 0.2965  | 0.274   | 3.43E-06 | 0.000247 | -8.30784 |
| 246 | 0.29925 | 0.27675 | 3.46E-06 | 0.000247 | -8.30798 |
| 248 | 0.3005  | 0.278   | 3.48E-06 | 0.000247 | -8.30805 |
| 250 | 0.3035  | 0.281   | 3.51E-06 | 0.000246 | -8.3082  |
| 252 | 0.30625 | 0.28375 | 3.55E-06 | 0.000246 | -8.30834 |
| 254 | 0.30875 | 0.28625 | 3.58E-06 | 0.000246 | -8.30847 |
| 256 | 0.31175 | 0.28925 | 3.62E-06 | 0.000246 | -8.30862 |
| 258 | 0.31425 | 0.29175 | 3.65E-06 | 0.000246 | -8.30874 |
| 260 | 0.317   | 0.2945  | 3.68E-06 | 0.000246 | -8.30888 |
| 262 | 0.32025 | 0.29775 | 3.72E-06 | 0.000246 | -8.30905 |

|     |         |         |          |          |          |
|-----|---------|---------|----------|----------|----------|
| 264 | 0.3225  | 0.3     | 3.75E-06 | 0.000246 | -8.30916 |
| 266 | 0.3245  | 0.302   | 3.78E-06 | 0.000246 | -8.30926 |
| 268 | 0.329   | 0.3065  | 3.83E-06 | 0.000246 | -8.30949 |
| 270 | 0.33125 | 0.30875 | 3.86E-06 | 0.000246 | -8.30961 |
| 272 | 0.33175 | 0.30925 | 3.87E-06 | 0.000246 | -8.30963 |
| 274 | 0.3355  | 0.313   | 3.91E-06 | 0.000246 | -8.30982 |
| 276 | 0.337   | 0.3145  | 3.93E-06 | 0.000246 | -8.3099  |
| 278 | 0.34125 | 0.31875 | 3.98E-06 | 0.000246 | -8.31012 |
| 280 | 0.34425 | 0.32175 | 4.02E-06 | 0.000246 | -8.31027 |
| 282 | 0.34675 | 0.32425 | 4.05E-06 | 0.000246 | -8.3104  |
| 284 | 0.35025 | 0.32775 | 4.1E-06  | 0.000246 | -8.31057 |
| 286 | 0.352   | 0.3295  | 4.12E-06 | 0.000246 | -8.31066 |
| 288 | 0.35475 | 0.33225 | 4.15E-06 | 0.000246 | -8.3108  |
| 290 | 0.35825 | 0.33575 | 4.2E-06  | 0.000246 | -8.31098 |
| 292 | 0.359   | 0.3365  | 4.21E-06 | 0.000246 | -8.31102 |
| 294 | 0.36075 | 0.33825 | 4.23E-06 | 0.000246 | -8.31111 |
| 296 | 0.36275 | 0.34025 | 4.25E-06 | 0.000246 | -8.31121 |
| 298 | 0.36575 | 0.34325 | 4.29E-06 | 0.000246 | -8.31136 |

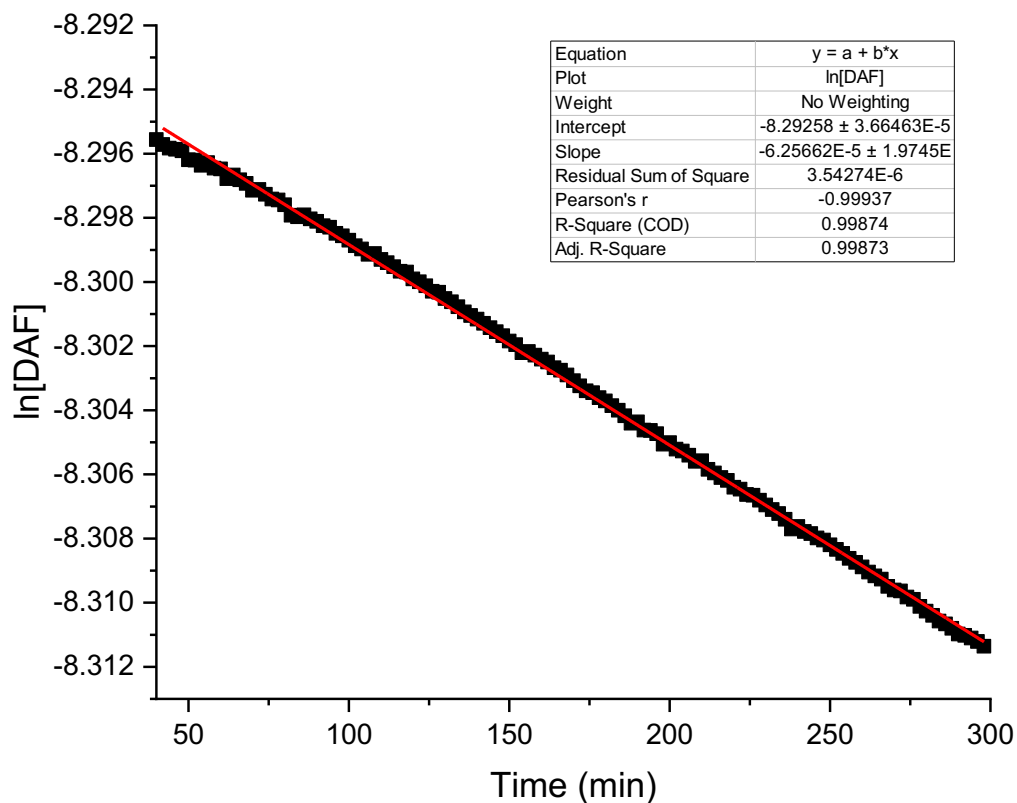

Catalysis of **DAF** to **FLU** in the presence of cage and **5 mM NaBr** (0.25 mM **DAF**, 50 mM pH 7 **PBS** buffer, 0.1 mM **CoH<sup>W</sup>BF<sub>4</sub>**)

| Time (min) | A@490nm | set to 0 | [FLU] (M) | [DAF] (M) | ln[DAF]  |
|------------|---------|----------|-----------|-----------|----------|
| 0          | 0.027   | 0        | 0         | 0.00025   | -8.29405 |
| 2          | 0.03125 | 0.00425  | 5.31E-08  | 0.00025   | -8.29426 |
| 4          | 0.03375 | 0.00675  | 8.44E-08  | 0.00025   | -8.29439 |
| 6          | 0.03375 | 0.00675  | 8.44E-08  | 0.00025   | -8.29439 |
| 8          | 0.0355  | 0.0085   | 1.06E-07  | 0.00025   | -8.29447 |
| 10         | 0.03375 | 0.00675  | 8.44E-08  | 0.00025   | -8.29439 |
| 12         | 0.036   | 0.009    | 1.13E-07  | 0.00025   | -8.2945  |
| 14         | 0.0325  | 0.0055   | 6.88E-08  | 0.00025   | -8.29432 |
| 16         | 0.03525 | 0.00825  | 1.03E-07  | 0.00025   | -8.29446 |
| 18         | 0.03875 | 0.01175  | 1.47E-07  | 0.00025   | -8.29464 |
| 20         | 0.037   | 0.01     | 1.25E-07  | 0.00025   | -8.29455 |
| 22         | 0.036   | 0.009    | 1.13E-07  | 0.00025   | -8.2945  |
| 24         | 0.037   | 0.01     | 1.25E-07  | 0.00025   | -8.29455 |
| 26         | 0.03725 | 0.01025  | 1.28E-07  | 0.00025   | -8.29456 |
| 28         | 0.03725 | 0.01025  | 1.28E-07  | 0.00025   | -8.29456 |
| 30         | 0.037   | 0.01     | 1.25E-07  | 0.00025   | -8.29455 |
| 32         | 0.038   | 0.011    | 1.38E-07  | 0.00025   | -8.2946  |
| 34         | 0.04025 | 0.01325  | 1.66E-07  | 0.00025   | -8.29471 |
| 36         | 0.0415  | 0.0145   | 1.81E-07  | 0.00025   | -8.29477 |
| 38         | 0.03925 | 0.01225  | 1.53E-07  | 0.00025   | -8.29466 |
| 40         | 0.0385  | 0.0115   | 1.44E-07  | 0.00025   | -8.29462 |
| 42         | 0.03725 | 0.01025  | 1.28E-07  | 0.00025   | -8.29456 |
| 44         | 0.04175 | 0.01475  | 1.84E-07  | 0.00025   | -8.29479 |
| 46         | 0.0415  | 0.0145   | 1.81E-07  | 0.00025   | -8.29477 |
| 48         | 0.04075 | 0.01375  | 1.72E-07  | 0.00025   | -8.29474 |
| 50         | 0.03975 | 0.01275  | 1.59E-07  | 0.00025   | -8.29469 |
| 52         | 0.04175 | 0.01475  | 1.84E-07  | 0.00025   | -8.29479 |
| 54         | 0.0415  | 0.0145   | 1.81E-07  | 0.00025   | -8.29477 |
| 56         | 0.04325 | 0.01625  | 2.03E-07  | 0.00025   | -8.29486 |
| 58         | 0.045   | 0.018    | 2.25E-07  | 0.00025   | -8.29495 |
| 60         | 0.043   | 0.016    | 2E-07     | 0.00025   | -8.29485 |
| 62         | 0.04325 | 0.01625  | 2.03E-07  | 0.00025   | -8.29486 |
| 64         | 0.04775 | 0.02075  | 2.59E-07  | 0.00025   | -8.29509 |
| 66         | 0.0465  | 0.0195   | 2.44E-07  | 0.00025   | -8.29503 |
| 68         | 0.04525 | 0.01825  | 2.28E-07  | 0.00025   | -8.29496 |
| 70         | 0.04725 | 0.02025  | 2.53E-07  | 0.00025   | -8.29506 |
| 72         | 0.04825 | 0.02125  | 2.66E-07  | 0.00025   | -8.29511 |
| 74         | 0.0455  | 0.0185   | 2.31E-07  | 0.00025   | -8.29498 |
| 76         | 0.046   | 0.019    | 2.38E-07  | 0.00025   | -8.295   |
| 78         | 0.0475  | 0.0205   | 2.56E-07  | 0.00025   | -8.29508 |
| 80         | 0.05    | 0.023    | 2.88E-07  | 0.00025   | -8.2952  |
| 82         | 0.05    | 0.023    | 2.88E-07  | 0.00025   | -8.2952  |
| 84         | 0.048   | 0.021    | 2.63E-07  | 0.00025   | -8.2951  |

|     |         |         |          |          |          |
|-----|---------|---------|----------|----------|----------|
| 86  | 0.05025 | 0.02325 | 2.91E-07 | 0.00025  | -8.29521 |
| 88  | 0.05325 | 0.02625 | 3.28E-07 | 0.00025  | -8.29536 |
| 90  | 0.05175 | 0.02475 | 3.09E-07 | 0.00025  | -8.29529 |
| 92  | 0.05075 | 0.02375 | 2.97E-07 | 0.00025  | -8.29524 |
| 94  | 0.05    | 0.023   | 2.88E-07 | 0.00025  | -8.2952  |
| 96  | 0.05325 | 0.02625 | 3.28E-07 | 0.00025  | -8.29536 |
| 98  | 0.052   | 0.025   | 3.13E-07 | 0.00025  | -8.2953  |
| 100 | 0.0535  | 0.0265  | 3.31E-07 | 0.00025  | -8.29538 |
| 102 | 0.054   | 0.027   | 3.38E-07 | 0.00025  | -8.2954  |
| 104 | 0.056   | 0.029   | 3.63E-07 | 0.00025  | -8.2955  |
| 106 | 0.0555  | 0.0285  | 3.56E-07 | 0.00025  | -8.29548 |
| 108 | 0.0545  | 0.0275  | 3.44E-07 | 0.00025  | -8.29543 |
| 110 | 0.057   | 0.03    | 3.75E-07 | 0.00025  | -8.29555 |
| 112 | 0.05625 | 0.02925 | 3.66E-07 | 0.00025  | -8.29551 |
| 114 | 0.05725 | 0.03025 | 3.78E-07 | 0.00025  | -8.29556 |
| 116 | 0.05875 | 0.03175 | 3.97E-07 | 0.00025  | -8.29564 |
| 118 | 0.0575  | 0.0305  | 3.81E-07 | 0.00025  | -8.29558 |
| 120 | 0.061   | 0.034   | 4.25E-07 | 0.00025  | -8.29575 |
| 122 | 0.05925 | 0.03225 | 4.03E-07 | 0.00025  | -8.29566 |
| 124 | 0.061   | 0.034   | 4.25E-07 | 0.00025  | -8.29575 |
| 126 | 0.06175 | 0.03475 | 4.34E-07 | 0.00025  | -8.29579 |
| 128 | 0.0605  | 0.0335  | 4.19E-07 | 0.00025  | -8.29573 |
| 130 | 0.06275 | 0.03575 | 4.47E-07 | 0.00025  | -8.29584 |
| 132 | 0.06225 | 0.03525 | 4.41E-07 | 0.00025  | -8.29581 |
| 134 | 0.064   | 0.037   | 4.63E-07 | 0.00025  | -8.2959  |
| 136 | 0.0655  | 0.0385  | 4.81E-07 | 0.00025  | -8.29598 |
| 138 | 0.06525 | 0.03825 | 4.78E-07 | 0.00025  | -8.29596 |
| 140 | 0.0655  | 0.0385  | 4.81E-07 | 0.00025  | -8.29598 |
| 142 | 0.06775 | 0.04075 | 5.09E-07 | 0.000249 | -8.29609 |
| 144 | 0.067   | 0.04    | 5E-07    | 0.00025  | -8.29605 |
| 146 | 0.06925 | 0.04225 | 5.28E-07 | 0.000249 | -8.29616 |
| 148 | 0.06975 | 0.04275 | 5.34E-07 | 0.000249 | -8.29619 |
| 150 | 0.06825 | 0.04125 | 5.16E-07 | 0.000249 | -8.29611 |
| 152 | 0.07025 | 0.04325 | 5.41E-07 | 0.000249 | -8.29621 |
| 154 | 0.0705  | 0.0435  | 5.44E-07 | 0.000249 | -8.29623 |
| 156 | 0.07175 | 0.04475 | 5.59E-07 | 0.000249 | -8.29629 |
| 158 | 0.07175 | 0.04475 | 5.59E-07 | 0.000249 | -8.29629 |
| 160 | 0.07175 | 0.04475 | 5.59E-07 | 0.000249 | -8.29629 |
| 162 | 0.0725  | 0.0455  | 5.69E-07 | 0.000249 | -8.29633 |
| 164 | 0.074   | 0.047   | 5.88E-07 | 0.000249 | -8.2964  |
| 166 | 0.07375 | 0.04675 | 5.84E-07 | 0.000249 | -8.29639 |
| 168 | 0.07425 | 0.04725 | 5.91E-07 | 0.000249 | -8.29641 |
| 170 | 0.07525 | 0.04825 | 6.03E-07 | 0.000249 | -8.29647 |
| 172 | 0.07625 | 0.04925 | 6.16E-07 | 0.000249 | -8.29652 |
| 174 | 0.078   | 0.051   | 6.38E-07 | 0.000249 | -8.2966  |
| 176 | 0.07875 | 0.05175 | 6.47E-07 | 0.000249 | -8.29664 |

|     |         |         |          |          |          |
|-----|---------|---------|----------|----------|----------|
| 178 | 0.0785  | 0.0515  | 6.44E-07 | 0.000249 | -8.29663 |
| 180 | 0.0795  | 0.0525  | 6.56E-07 | 0.000249 | -8.29668 |
| 182 | 0.08025 | 0.05325 | 6.66E-07 | 0.000249 | -8.29672 |
| 184 | 0.0805  | 0.0535  | 6.69E-07 | 0.000249 | -8.29673 |
| 186 | 0.08075 | 0.05375 | 6.72E-07 | 0.000249 | -8.29674 |
| 188 | 0.0825  | 0.0555  | 6.94E-07 | 0.000249 | -8.29683 |
| 190 | 0.0815  | 0.0545  | 6.81E-07 | 0.000249 | -8.29678 |
| 192 | 0.08475 | 0.05775 | 7.22E-07 | 0.000249 | -8.29694 |
| 194 | 0.08475 | 0.05775 | 7.22E-07 | 0.000249 | -8.29694 |
| 196 | 0.085   | 0.058   | 7.25E-07 | 0.000249 | -8.29695 |
| 198 | 0.0865  | 0.0595  | 7.44E-07 | 0.000249 | -8.29703 |
| 200 | 0.087   | 0.06    | 7.5E-07  | 0.000249 | -8.29705 |
| 202 | 0.08775 | 0.06075 | 7.59E-07 | 0.000249 | -8.29709 |
| 204 | 0.09    | 0.063   | 7.88E-07 | 0.000249 | -8.2972  |
| 206 | 0.08875 | 0.06175 | 7.72E-07 | 0.000249 | -8.29714 |
| 208 | 0.09025 | 0.06325 | 7.91E-07 | 0.000249 | -8.29722 |
| 210 | 0.08975 | 0.06275 | 7.84E-07 | 0.000249 | -8.29719 |
| 212 | 0.0925  | 0.0655  | 8.19E-07 | 0.000249 | -8.29733 |
| 214 | 0.09175 | 0.06475 | 8.09E-07 | 0.000249 | -8.29729 |
| 216 | 0.0935  | 0.0665  | 8.31E-07 | 0.000249 | -8.29738 |
| 218 | 0.09275 | 0.06575 | 8.22E-07 | 0.000249 | -8.29734 |
| 220 | 0.0955  | 0.0685  | 8.56E-07 | 0.000249 | -8.29748 |
| 222 | 0.09575 | 0.06875 | 8.59E-07 | 0.000249 | -8.29749 |
| 224 | 0.096   | 0.069   | 8.63E-07 | 0.000249 | -8.29751 |
| 226 | 0.09675 | 0.06975 | 8.72E-07 | 0.000249 | -8.29754 |
| 228 | 0.09675 | 0.06975 | 8.72E-07 | 0.000249 | -8.29754 |
| 230 | 0.0985  | 0.0715  | 8.94E-07 | 0.000249 | -8.29763 |
| 232 | 0.099   | 0.072   | 9E-07    | 0.000249 | -8.29766 |
| 234 | 0.10025 | 0.07325 | 9.16E-07 | 0.000249 | -8.29772 |
| 236 | 0.10075 | 0.07375 | 9.22E-07 | 0.000249 | -8.29774 |
| 238 | 0.10225 | 0.07525 | 9.41E-07 | 0.000249 | -8.29782 |
| 240 | 0.10175 | 0.07475 | 9.34E-07 | 0.000249 | -8.29779 |
| 242 | 0.10475 | 0.07775 | 9.72E-07 | 0.000249 | -8.29794 |
| 244 | 0.10475 | 0.07775 | 9.72E-07 | 0.000249 | -8.29794 |
| 246 | 0.1055  | 0.0785  | 9.81E-07 | 0.000249 | -8.29798 |
| 248 | 0.10475 | 0.07775 | 9.72E-07 | 0.000249 | -8.29794 |
| 250 | 0.1065  | 0.0795  | 9.94E-07 | 0.000249 | -8.29803 |
| 252 | 0.106   | 0.079   | 9.88E-07 | 0.000249 | -8.29801 |
| 254 | 0.1065  | 0.0795  | 9.94E-07 | 0.000249 | -8.29803 |
| 256 | 0.10875 | 0.08175 | 1.02E-06 | 0.000249 | -8.29815 |
| 258 | 0.10925 | 0.08225 | 1.03E-06 | 0.000249 | -8.29817 |
| 260 | 0.11    | 0.083   | 1.04E-06 | 0.000249 | -8.29821 |
| 262 | 0.112   | 0.085   | 1.06E-06 | 0.000249 | -8.29831 |
| 264 | 0.11125 | 0.08425 | 1.05E-06 | 0.000249 | -8.29827 |
| 266 | 0.114   | 0.087   | 1.09E-06 | 0.000249 | -8.29841 |
| 268 | 0.1155  | 0.0885  | 1.11E-06 | 0.000249 | -8.29848 |

|     |         |         |          |          |          |
|-----|---------|---------|----------|----------|----------|
| 270 | 0.11625 | 0.08925 | 1.12E-06 | 0.000249 | -8.29852 |
| 272 | 0.114   | 0.087   | 1.09E-06 | 0.000249 | -8.29841 |
| 274 | 0.11675 | 0.08975 | 1.12E-06 | 0.000249 | -8.29855 |
| 276 | 0.115   | 0.088   | 1.1E-06  | 0.000249 | -8.29846 |
| 278 | 0.1175  | 0.0905  | 1.13E-06 | 0.000249 | -8.29858 |
| 280 | 0.11875 | 0.09175 | 1.15E-06 | 0.000249 | -8.29865 |
| 282 | 0.11825 | 0.09125 | 1.14E-06 | 0.000249 | -8.29862 |
| 284 | 0.12    | 0.093   | 1.16E-06 | 0.000249 | -8.29871 |
| 286 | 0.1245  | 0.0975  | 1.22E-06 | 0.000249 | -8.29894 |
| 288 | 0.128   | 0.101   | 1.26E-06 | 0.000249 | -8.29911 |
| 290 | 0.12625 | 0.09925 | 1.24E-06 | 0.000249 | -8.29902 |
| 292 | 0.1235  | 0.0965  | 1.21E-06 | 0.000249 | -8.29889 |
| 294 | 0.125   | 0.098   | 1.23E-06 | 0.000249 | -8.29896 |
| 296 | 0.12575 | 0.09875 | 1.23E-06 | 0.000249 | -8.299   |
| 298 | 0.12825 | 0.10125 | 1.27E-06 | 0.000249 | -8.29912 |

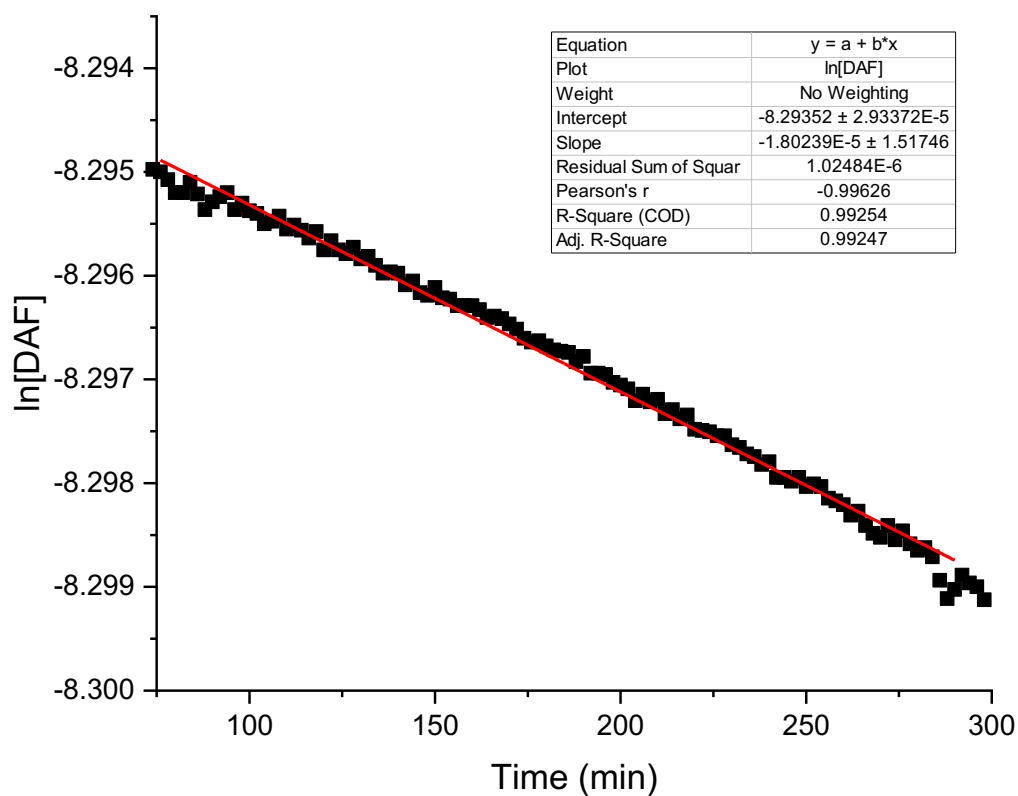

Catalysis of **DAF** to **FLU** in the presence of cage and **5 mM NaNO<sub>3</sub>** (0.25 mM **DAF**, 50 mM pH 7 **PBS** buffer, 0.1 mM **CoH<sup>w</sup>BF<sub>4</sub>**)

| Time (min) | A@490nm | set to 0 | [FLU] (M) | [DAF] (M) | ln[DAF]  |
|------------|---------|----------|-----------|-----------|----------|
| 0          | 0.024   | 0        | 0         | 0.00025   | -8.29405 |
| 2          | 0.03075 | 0.00675  | 8.44E-08  | 0.00025   | -8.29439 |
| 4          | 0.034   | 0.01     | 1.25E-07  | 0.00025   | -8.29455 |
| 6          | 0.03325 | 0.00925  | 1.16E-07  | 0.00025   | -8.29451 |
| 8          | 0.03275 | 0.00875  | 1.09E-07  | 0.00025   | -8.29449 |
| 10         | 0.0325  | 0.0085   | 1.06E-07  | 0.00025   | -8.29447 |
| 12         | 0.03375 | 0.00975  | 1.22E-07  | 0.00025   | -8.29454 |
| 14         | 0.02975 | 0.00575  | 7.19E-08  | 0.00025   | -8.29434 |
| 16         | 0.0335  | 0.0095   | 1.19E-07  | 0.00025   | -8.29452 |
| 18         | 0.035   | 0.011    | 1.38E-07  | 0.00025   | -8.2946  |
| 20         | 0.03675 | 0.01275  | 1.59E-07  | 0.00025   | -8.29469 |
| 22         | 0.03275 | 0.00875  | 1.09E-07  | 0.00025   | -8.29449 |
| 24         | 0.03375 | 0.00975  | 1.22E-07  | 0.00025   | -8.29454 |
| 26         | 0.03425 | 0.01025  | 1.28E-07  | 0.00025   | -8.29456 |
| 28         | 0.034   | 0.01     | 1.25E-07  | 0.00025   | -8.29455 |
| 30         | 0.03425 | 0.01025  | 1.28E-07  | 0.00025   | -8.29456 |
| 32         | 0.03525 | 0.01125  | 1.41E-07  | 0.00025   | -8.29461 |
| 34         | 0.035   | 0.011    | 1.38E-07  | 0.00025   | -8.2946  |
| 36         | 0.03675 | 0.01275  | 1.59E-07  | 0.00025   | -8.29469 |
| 38         | 0.03525 | 0.01125  | 1.41E-07  | 0.00025   | -8.29461 |
| 40         | 0.035   | 0.011    | 1.38E-07  | 0.00025   | -8.2946  |
| 42         | 0.035   | 0.011    | 1.38E-07  | 0.00025   | -8.2946  |
| 44         | 0.037   | 0.013    | 1.63E-07  | 0.00025   | -8.2947  |
| 46         | 0.03625 | 0.01225  | 1.53E-07  | 0.00025   | -8.29466 |
| 48         | 0.03725 | 0.01325  | 1.66E-07  | 0.00025   | -8.29471 |
| 50         | 0.03575 | 0.01175  | 1.47E-07  | 0.00025   | -8.29464 |
| 52         | 0.03725 | 0.01325  | 1.66E-07  | 0.00025   | -8.29471 |
| 54         | 0.03775 | 0.01375  | 1.72E-07  | 0.00025   | -8.29474 |
| 56         | 0.03675 | 0.01275  | 1.59E-07  | 0.00025   | -8.29469 |
| 58         | 0.03875 | 0.01475  | 1.84E-07  | 0.00025   | -8.29479 |
| 60         | 0.03775 | 0.01375  | 1.72E-07  | 0.00025   | -8.29474 |
| 62         | 0.04075 | 0.01675  | 2.09E-07  | 0.00025   | -8.29489 |
| 64         | 0.0385  | 0.0145   | 1.81E-07  | 0.00025   | -8.29477 |
| 66         | 0.03975 | 0.01575  | 1.97E-07  | 0.00025   | -8.29484 |
| 68         | 0.04025 | 0.01625  | 2.03E-07  | 0.00025   | -8.29486 |
| 70         | 0.04125 | 0.01725  | 2.16E-07  | 0.00025   | -8.29491 |
| 72         | 0.04025 | 0.01625  | 2.03E-07  | 0.00025   | -8.29486 |
| 74         | 0.0415  | 0.0175   | 2.19E-07  | 0.00025   | -8.29493 |
| 76         | 0.041   | 0.017    | 2.13E-07  | 0.00025   | -8.2949  |
| 78         | 0.0415  | 0.0175   | 2.19E-07  | 0.00025   | -8.29493 |
| 80         | 0.04425 | 0.02025  | 2.53E-07  | 0.00025   | -8.29506 |
| 82         | 0.046   | 0.022    | 2.75E-07  | 0.00025   | -8.29515 |
| 84         | 0.04375 | 0.01975  | 2.47E-07  | 0.00025   | -8.29504 |



|     |         |         |          |          |          |
|-----|---------|---------|----------|----------|----------|
| 86  | 0.04425 | 0.02025 | 2.53E-07 | 0.00025  | -8.29506 |
| 88  | 0.04325 | 0.01925 | 2.41E-07 | 0.00025  | -8.29501 |
| 90  | 0.0455  | 0.0215  | 2.69E-07 | 0.00025  | -8.29513 |
| 92  | 0.04625 | 0.02225 | 2.78E-07 | 0.00025  | -8.29516 |
| 94  | 0.04475 | 0.02075 | 2.59E-07 | 0.00025  | -8.29509 |
| 96  | 0.046   | 0.022   | 2.75E-07 | 0.00025  | -8.29515 |
| 98  | 0.04525 | 0.02125 | 2.66E-07 | 0.00025  | -8.29511 |
| 100 | 0.04675 | 0.02275 | 2.84E-07 | 0.00025  | -8.29519 |
| 102 | 0.04625 | 0.02225 | 2.78E-07 | 0.00025  | -8.29516 |
| 104 | 0.0485  | 0.0245  | 3.06E-07 | 0.00025  | -8.29528 |
| 106 | 0.04875 | 0.02475 | 3.09E-07 | 0.00025  | -8.29529 |
| 108 | 0.04825 | 0.02425 | 3.03E-07 | 0.00025  | -8.29526 |
| 110 | 0.04975 | 0.02575 | 3.22E-07 | 0.00025  | -8.29534 |
| 112 | 0.05025 | 0.02625 | 3.28E-07 | 0.00025  | -8.29536 |
| 114 | 0.05    | 0.026   | 3.25E-07 | 0.00025  | -8.29535 |
| 116 | 0.05075 | 0.02675 | 3.34E-07 | 0.00025  | -8.29539 |
| 118 | 0.04975 | 0.02575 | 3.22E-07 | 0.00025  | -8.29534 |
| 120 | 0.051   | 0.027   | 3.38E-07 | 0.00025  | -8.2954  |
| 122 | 0.05175 | 0.02775 | 3.47E-07 | 0.00025  | -8.29544 |
| 124 | 0.0525  | 0.0285  | 3.56E-07 | 0.00025  | -8.29548 |
| 126 | 0.05275 | 0.02875 | 3.59E-07 | 0.00025  | -8.29549 |
| 128 | 0.05275 | 0.02875 | 3.59E-07 | 0.00025  | -8.29549 |
| 130 | 0.05325 | 0.02925 | 3.66E-07 | 0.00025  | -8.29551 |
| 132 | 0.0525  | 0.0285  | 3.56E-07 | 0.00025  | -8.29548 |
| 134 | 0.05525 | 0.03125 | 3.91E-07 | 0.00025  | -8.29561 |
| 136 | 0.05525 | 0.03125 | 3.91E-07 | 0.00025  | -8.29561 |
| 138 | 0.05475 | 0.03075 | 3.84E-07 | 0.00025  | -8.29559 |
| 140 | 0.056   | 0.032   | 4E-07    | 0.00025  | -8.29565 |
| 142 | 0.0575  | 0.0335  | 4.19E-07 | 0.00025  | -8.29573 |
| 144 | 0.057   | 0.033   | 4.13E-07 | 0.00025  | -8.2957  |
| 146 | 0.05775 | 0.03375 | 4.22E-07 | 0.00025  | -8.29574 |
| 148 | 0.058   | 0.034   | 4.25E-07 | 0.00025  | -8.29575 |
| 150 | 0.0575  | 0.0335  | 4.19E-07 | 0.00025  | -8.29573 |
| 152 | 0.05925 | 0.03525 | 4.41E-07 | 0.00025  | -8.29581 |
| 154 | 0.059   | 0.035   | 4.38E-07 | 0.00025  | -8.2958  |
| 156 | 0.06025 | 0.03625 | 4.53E-07 | 0.00025  | -8.29586 |
| 158 | 0.06    | 0.036   | 4.5E-07  | 0.00025  | -8.29585 |
| 160 | 0.06025 | 0.03625 | 4.53E-07 | 0.00025  | -8.29586 |
| 162 | 0.06075 | 0.03675 | 4.59E-07 | 0.00025  | -8.29589 |
| 164 | 0.062   | 0.038   | 4.75E-07 | 0.00025  | -8.29595 |
| 166 | 0.06225 | 0.03825 | 4.78E-07 | 0.00025  | -8.29596 |
| 168 | 0.06275 | 0.03875 | 4.84E-07 | 0.00025  | -8.29599 |
| 170 | 0.063   | 0.039   | 4.88E-07 | 0.00025  | -8.296   |
| 172 | 0.0645  | 0.0405  | 5.06E-07 | 0.000249 | -8.29608 |
| 174 | 0.06525 | 0.04125 | 5.16E-07 | 0.000249 | -8.29611 |
| 176 | 0.065   | 0.041   | 5.13E-07 | 0.000249 | -8.2961  |

|     |         |         |          |          |          |
|-----|---------|---------|----------|----------|----------|
| 178 | 0.06625 | 0.04225 | 5.28E-07 | 0.000249 | -8.29616 |
| 180 | 0.06625 | 0.04225 | 5.28E-07 | 0.000249 | -8.29616 |
| 182 | 0.067   | 0.043   | 5.38E-07 | 0.000249 | -8.2962  |
| 184 | 0.067   | 0.043   | 5.38E-07 | 0.000249 | -8.2962  |
| 186 | 0.0665  | 0.0425  | 5.31E-07 | 0.000249 | -8.29618 |
| 188 | 0.069   | 0.045   | 5.63E-07 | 0.000249 | -8.2963  |
| 190 | 0.067   | 0.043   | 5.38E-07 | 0.000249 | -8.2962  |
| 192 | 0.07025 | 0.04625 | 5.78E-07 | 0.000249 | -8.29636 |
| 194 | 0.07025 | 0.04625 | 5.78E-07 | 0.000249 | -8.29636 |
| 196 | 0.0695  | 0.0455  | 5.69E-07 | 0.000249 | -8.29633 |
| 198 | 0.071   | 0.047   | 5.88E-07 | 0.000249 | -8.2964  |
| 200 | 0.0715  | 0.0475  | 5.94E-07 | 0.000249 | -8.29643 |
| 202 | 0.07325 | 0.04925 | 6.16E-07 | 0.000249 | -8.29652 |
| 204 | 0.07225 | 0.04825 | 6.03E-07 | 0.000249 | -8.29647 |
| 206 | 0.07325 | 0.04925 | 6.16E-07 | 0.000249 | -8.29652 |
| 208 | 0.07525 | 0.05125 | 6.41E-07 | 0.000249 | -8.29662 |
| 210 | 0.0745  | 0.0505  | 6.31E-07 | 0.000249 | -8.29658 |
| 212 | 0.07475 | 0.05075 | 6.34E-07 | 0.000249 | -8.29659 |
| 214 | 0.07475 | 0.05075 | 6.34E-07 | 0.000249 | -8.29659 |
| 216 | 0.0765  | 0.0525  | 6.56E-07 | 0.000249 | -8.29668 |
| 218 | 0.0755  | 0.0515  | 6.44E-07 | 0.000249 | -8.29663 |
| 220 | 0.07725 | 0.05325 | 6.66E-07 | 0.000249 | -8.29672 |
| 222 | 0.0775  | 0.0535  | 6.69E-07 | 0.000249 | -8.29673 |
| 224 | 0.07975 | 0.05575 | 6.97E-07 | 0.000249 | -8.29684 |
| 226 | 0.0775  | 0.0535  | 6.69E-07 | 0.000249 | -8.29673 |
| 228 | 0.07825 | 0.05425 | 6.78E-07 | 0.000249 | -8.29677 |
| 230 | 0.08025 | 0.05625 | 7.03E-07 | 0.000249 | -8.29687 |
| 232 | 0.08075 | 0.05675 | 7.09E-07 | 0.000249 | -8.29689 |
| 234 | 0.08025 | 0.05625 | 7.03E-07 | 0.000249 | -8.29687 |
| 236 | 0.08125 | 0.05725 | 7.16E-07 | 0.000249 | -8.29692 |
| 238 | 0.08275 | 0.05875 | 7.34E-07 | 0.000249 | -8.29699 |
| 240 | 0.08275 | 0.05875 | 7.34E-07 | 0.000249 | -8.29699 |
| 242 | 0.0845  | 0.0605  | 7.56E-07 | 0.000249 | -8.29708 |
| 244 | 0.08325 | 0.05925 | 7.41E-07 | 0.000249 | -8.29702 |
| 246 | 0.08475 | 0.06075 | 7.59E-07 | 0.000249 | -8.29709 |
| 248 | 0.0835  | 0.0595  | 7.44E-07 | 0.000249 | -8.29703 |
| 250 | 0.0855  | 0.0615  | 7.69E-07 | 0.000249 | -8.29713 |
| 252 | 0.086   | 0.062   | 7.75E-07 | 0.000249 | -8.29715 |
| 254 | 0.086   | 0.062   | 7.75E-07 | 0.000249 | -8.29715 |
| 256 | 0.08825 | 0.06425 | 8.03E-07 | 0.000249 | -8.29727 |
| 258 | 0.08875 | 0.06475 | 8.09E-07 | 0.000249 | -8.29729 |
| 260 | 0.089   | 0.065   | 8.13E-07 | 0.000249 | -8.2973  |
| 262 | 0.09025 | 0.06625 | 8.28E-07 | 0.000249 | -8.29737 |
| 264 | 0.09025 | 0.06625 | 8.28E-07 | 0.000249 | -8.29737 |
| 266 | 0.091   | 0.067   | 8.38E-07 | 0.000249 | -8.29741 |
| 268 | 0.0925  | 0.0685  | 8.56E-07 | 0.000249 | -8.29748 |

|     |         |         |          |          |          |
|-----|---------|---------|----------|----------|----------|
| 270 | 0.0935  | 0.0695  | 8.69E-07 | 0.000249 | -8.29753 |
| 272 | 0.092   | 0.068   | 8.5E-07  | 0.000249 | -8.29746 |
| 274 | 0.09425 | 0.07025 | 8.78E-07 | 0.000249 | -8.29757 |
| 276 | 0.09325 | 0.06925 | 8.66E-07 | 0.000249 | -8.29752 |
| 278 | 0.09425 | 0.07025 | 8.78E-07 | 0.000249 | -8.29757 |
| 280 | 0.09475 | 0.07075 | 8.84E-07 | 0.000249 | -8.29759 |
| 282 | 0.095   | 0.071   | 8.88E-07 | 0.000249 | -8.29761 |
| 284 | 0.0965  | 0.0725  | 9.06E-07 | 0.000249 | -8.29768 |
| 286 | 0.09725 | 0.07325 | 9.16E-07 | 0.000249 | -8.29772 |
| 288 | 0.0985  | 0.0745  | 9.31E-07 | 0.000249 | -8.29778 |
| 290 | 0.0995  | 0.0755  | 9.44E-07 | 0.000249 | -8.29783 |
| 292 | 0.0995  | 0.0755  | 9.44E-07 | 0.000249 | -8.29783 |
| 294 | 0.10025 | 0.07625 | 9.53E-07 | 0.000249 | -8.29787 |
| 296 | 0.10075 | 0.07675 | 9.59E-07 | 0.000249 | -8.29789 |
| 298 | 0.10275 | 0.07875 | 9.84E-07 | 0.000249 | -8.29799 |

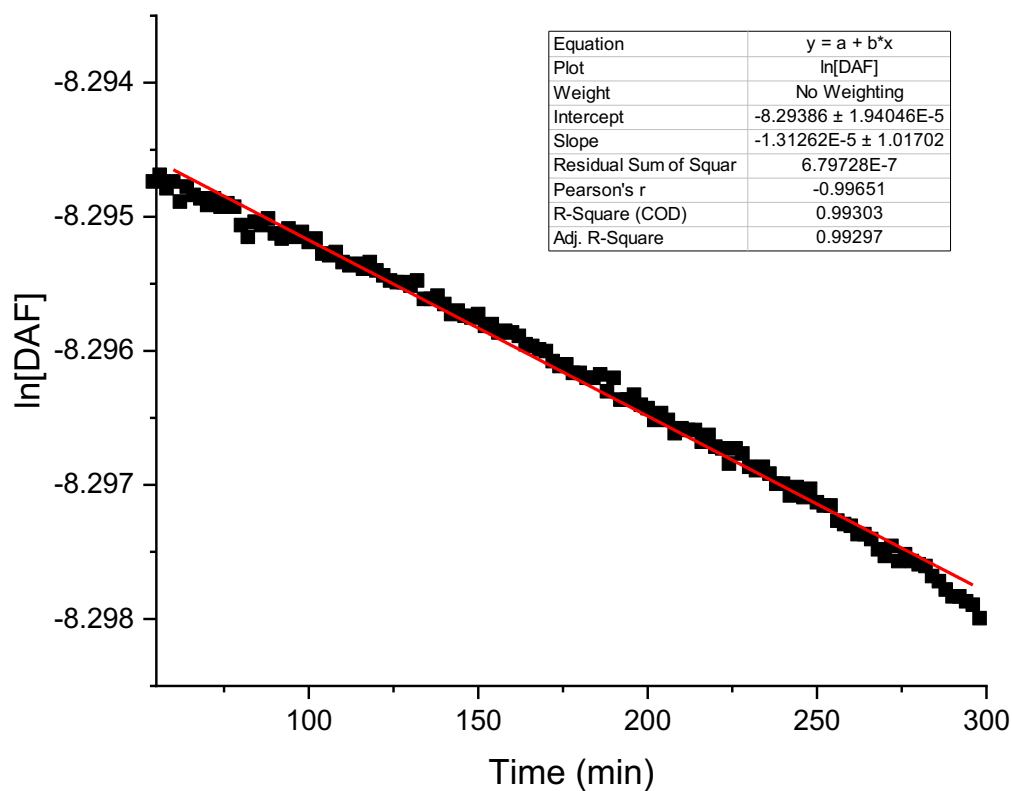

Catalysis of **DAF** to **FLU** in the presence of cage and **5 mM NaHCO<sub>3</sub>** (0.25 mM **DAF**, 50 mM pH 7 **PBS** buffer, 0.1 mM **CoH<sup>W</sup>BF<sub>4</sub>**)

| Time (min) | A@490nm | set to 0 | [FLU] (M) | [DAF] (M) | ln[DAF]  |
|------------|---------|----------|-----------|-----------|----------|
| 0          | 0.0245  | 0        | 0         | 0.00025   | -8.29405 |
| 2          | 0.03425 | 0.00975  | 1.22E-07  | 0.00025   | -8.29454 |
| 4          | 0.03375 | 0.00925  | 1.16E-07  | 0.00025   | -8.29451 |
| 6          | 0.03525 | 0.01075  | 1.34E-07  | 0.00025   | -8.29459 |
| 8          | 0.0355  | 0.011    | 1.38E-07  | 0.00025   | -8.2946  |
| 10         | 0.03625 | 0.01175  | 1.47E-07  | 0.00025   | -8.29464 |
| 12         | 0.0365  | 0.012    | 1.5E-07   | 0.00025   | -8.29465 |
| 14         | 0.0325  | 0.008    | 1E-07     | 0.00025   | -8.29445 |
| 16         | 0.04075 | 0.01625  | 2.03E-07  | 0.00025   | -8.29486 |
| 18         | 0.04075 | 0.01625  | 2.03E-07  | 0.00025   | -8.29486 |
| 20         | 0.043   | 0.0185   | 2.31E-07  | 0.00025   | -8.29498 |
| 22         | 0.04275 | 0.01825  | 2.28E-07  | 0.00025   | -8.29496 |
| 24         | 0.0435  | 0.019    | 2.38E-07  | 0.00025   | -8.295   |
| 26         | 0.04875 | 0.02425  | 3.03E-07  | 0.00025   | -8.29526 |
| 28         | 0.04725 | 0.02275  | 2.84E-07  | 0.00025   | -8.29519 |
| 30         | 0.04575 | 0.02125  | 2.66E-07  | 0.00025   | -8.29511 |
| 32         | 0.05225 | 0.02775  | 3.47E-07  | 0.00025   | -8.29544 |
| 34         | 0.05    | 0.0255   | 3.19E-07  | 0.00025   | -8.29533 |
| 36         | 0.054   | 0.0295   | 3.69E-07  | 0.00025   | -8.29553 |
| 38         | 0.0535  | 0.029    | 3.63E-07  | 0.00025   | -8.2955  |
| 40         | 0.05575 | 0.03125  | 3.91E-07  | 0.00025   | -8.29561 |
| 42         | 0.061   | 0.0365   | 4.56E-07  | 0.00025   | -8.29588 |
| 44         | 0.06125 | 0.03675  | 4.59E-07  | 0.00025   | -8.29589 |
| 46         | 0.0625  | 0.038    | 4.75E-07  | 0.00025   | -8.29595 |
| 48         | 0.0635  | 0.039    | 4.88E-07  | 0.00025   | -8.296   |
| 50         | 0.06625 | 0.04175  | 5.22E-07  | 0.000249  | -8.29614 |
| 52         | 0.06825 | 0.04375  | 5.47E-07  | 0.000249  | -8.29624 |
| 54         | 0.0725  | 0.048    | 6E-07     | 0.000249  | -8.29645 |
| 56         | 0.074   | 0.0495   | 6.19E-07  | 0.000249  | -8.29653 |
| 58         | 0.07575 | 0.05125  | 6.41E-07  | 0.000249  | -8.29662 |
| 60         | 0.07625 | 0.05175  | 6.47E-07  | 0.000249  | -8.29664 |
| 62         | 0.0805  | 0.056    | 7E-07     | 0.000249  | -8.29685 |
| 64         | 0.08125 | 0.05675  | 7.09E-07  | 0.000249  | -8.29689 |
| 66         | 0.08325 | 0.05875  | 7.34E-07  | 0.000249  | -8.29699 |
| 68         | 0.08675 | 0.06225  | 7.78E-07  | 0.000249  | -8.29717 |
| 70         | 0.09125 | 0.06675  | 8.34E-07  | 0.000249  | -8.29739 |
| 72         | 0.09125 | 0.06675  | 8.34E-07  | 0.000249  | -8.29739 |
| 74         | 0.09275 | 0.06825  | 8.53E-07  | 0.000249  | -8.29747 |
| 76         | 0.09575 | 0.07125  | 8.91E-07  | 0.000249  | -8.29762 |
| 78         | 0.10475 | 0.08025  | 1E-06     | 0.000249  | -8.29807 |
| 80         | 0.10275 | 0.07825  | 9.78E-07  | 0.000249  | -8.29797 |
| 82         | 0.1065  | 0.082    | 1.03E-06  | 0.000249  | -8.29816 |
| 84         | 0.10875 | 0.08425  | 1.05E-06  | 0.000249  | -8.29827 |

|     |         |         |          |          |          |
|-----|---------|---------|----------|----------|----------|
| 86  | 0.111   | 0.0865  | 1.08E-06 | 0.000249 | -8.29838 |
| 88  | 0.114   | 0.0895  | 1.12E-06 | 0.000249 | -8.29853 |
| 90  | 0.1175  | 0.093   | 1.16E-06 | 0.000249 | -8.29871 |
| 92  | 0.1205  | 0.096   | 1.2E-06  | 0.000249 | -8.29886 |
| 94  | 0.127   | 0.1025  | 1.28E-06 | 0.000249 | -8.29919 |
| 96  | 0.1255  | 0.101   | 1.26E-06 | 0.000249 | -8.29911 |
| 98  | 0.1285  | 0.104   | 1.3E-06  | 0.000249 | -8.29926 |
| 100 | 0.1325  | 0.108   | 1.35E-06 | 0.000249 | -8.29946 |
| 102 | 0.1335  | 0.109   | 1.36E-06 | 0.000249 | -8.29951 |
| 104 | 0.13775 | 0.11325 | 1.42E-06 | 0.000249 | -8.29973 |
| 106 | 0.1405  | 0.116   | 1.45E-06 | 0.000249 | -8.29987 |
| 108 | 0.14225 | 0.11775 | 1.47E-06 | 0.000249 | -8.29995 |
| 110 | 0.14625 | 0.12175 | 1.52E-06 | 0.000248 | -8.30016 |
| 112 | 0.149   | 0.1245  | 1.56E-06 | 0.000248 | -8.30029 |
| 114 | 0.153   | 0.1285  | 1.61E-06 | 0.000248 | -8.3005  |
| 116 | 0.15475 | 0.13025 | 1.63E-06 | 0.000248 | -8.30058 |
| 118 | 0.16075 | 0.13625 | 1.7E-06  | 0.000248 | -8.30089 |
| 120 | 0.1595  | 0.135   | 1.69E-06 | 0.000248 | -8.30082 |
| 122 | 0.1635  | 0.139   | 1.74E-06 | 0.000248 | -8.30102 |
| 124 | 0.166   | 0.1415  | 1.77E-06 | 0.000248 | -8.30115 |
| 126 | 0.16975 | 0.14525 | 1.82E-06 | 0.000248 | -8.30134 |
| 128 | 0.171   | 0.1465  | 1.83E-06 | 0.000248 | -8.3014  |
| 130 | 0.17675 | 0.15225 | 1.9E-06  | 0.000248 | -8.30169 |
| 132 | 0.179   | 0.1545  | 1.93E-06 | 0.000248 | -8.3018  |
| 134 | 0.1825  | 0.158   | 1.98E-06 | 0.000248 | -8.30198 |
| 136 | 0.1865  | 0.162   | 2.03E-06 | 0.000248 | -8.30218 |
| 138 | 0.18825 | 0.16375 | 2.05E-06 | 0.000248 | -8.30227 |
| 140 | 0.19225 | 0.16775 | 2.1E-06  | 0.000248 | -8.30247 |
| 142 | 0.19525 | 0.17075 | 2.13E-06 | 0.000248 | -8.30262 |
| 144 | 0.1975  | 0.173   | 2.16E-06 | 0.000248 | -8.30274 |
| 146 | 0.20175 | 0.17725 | 2.22E-06 | 0.000248 | -8.30295 |
| 148 | 0.205   | 0.1805  | 2.26E-06 | 0.000248 | -8.30312 |
| 150 | 0.208   | 0.1835  | 2.29E-06 | 0.000248 | -8.30327 |
| 152 | 0.211   | 0.1865  | 2.33E-06 | 0.000248 | -8.30342 |
| 154 | 0.2145  | 0.19    | 2.38E-06 | 0.000248 | -8.3036  |
| 156 | 0.218   | 0.1935  | 2.42E-06 | 0.000248 | -8.30377 |
| 158 | 0.2205  | 0.196   | 2.45E-06 | 0.000248 | -8.3039  |
| 160 | 0.224   | 0.1995  | 2.49E-06 | 0.000248 | -8.30407 |
| 162 | 0.227   | 0.2025  | 2.53E-06 | 0.000247 | -8.30423 |
| 164 | 0.232   | 0.2075  | 2.59E-06 | 0.000247 | -8.30448 |
| 166 | 0.2335  | 0.209   | 2.61E-06 | 0.000247 | -8.30455 |
| 168 | 0.23725 | 0.21275 | 2.66E-06 | 0.000247 | -8.30474 |
| 170 | 0.24025 | 0.21575 | 2.7E-06  | 0.000247 | -8.3049  |
| 172 | 0.244   | 0.2195  | 2.74E-06 | 0.000247 | -8.30509 |
| 174 | 0.24825 | 0.22375 | 2.8E-06  | 0.000247 | -8.3053  |
| 176 | 0.25025 | 0.22575 | 2.82E-06 | 0.000247 | -8.3054  |

|     |         |         |          |          |          |
|-----|---------|---------|----------|----------|----------|
| 178 | 0.25475 | 0.23025 | 2.88E-06 | 0.000247 | -8.30563 |
| 180 | 0.25825 | 0.23375 | 2.92E-06 | 0.000247 | -8.30581 |
| 182 | 0.261   | 0.2365  | 2.96E-06 | 0.000247 | -8.30595 |
| 184 | 0.26325 | 0.23875 | 2.98E-06 | 0.000247 | -8.30606 |
| 186 | 0.267   | 0.2425  | 3.03E-06 | 0.000247 | -8.30625 |
| 188 | 0.2715  | 0.247   | 3.09E-06 | 0.000247 | -8.30648 |
| 190 | 0.27325 | 0.24875 | 3.11E-06 | 0.000247 | -8.30657 |
| 192 | 0.2785  | 0.254   | 3.18E-06 | 0.000247 | -8.30683 |
| 194 | 0.2815  | 0.257   | 3.21E-06 | 0.000247 | -8.30698 |
| 196 | 0.28425 | 0.25975 | 3.25E-06 | 0.000247 | -8.30712 |
| 198 | 0.28775 | 0.26325 | 3.29E-06 | 0.000247 | -8.3073  |
| 200 | 0.29075 | 0.26625 | 3.33E-06 | 0.000247 | -8.30745 |
| 202 | 0.29525 | 0.27075 | 3.38E-06 | 0.000247 | -8.30768 |
| 204 | 0.2975  | 0.273   | 3.41E-06 | 0.000247 | -8.30779 |
| 206 | 0.3015  | 0.277   | 3.46E-06 | 0.000247 | -8.308   |
| 208 | 0.30625 | 0.28175 | 3.52E-06 | 0.000246 | -8.30824 |
| 210 | 0.307   | 0.2825  | 3.53E-06 | 0.000246 | -8.30828 |
| 212 | 0.312   | 0.2875  | 3.59E-06 | 0.000246 | -8.30853 |
| 214 | 0.31375 | 0.28925 | 3.62E-06 | 0.000246 | -8.30862 |
| 216 | 0.31775 | 0.29325 | 3.67E-06 | 0.000246 | -8.30882 |
| 218 | 0.32025 | 0.29575 | 3.7E-06  | 0.000246 | -8.30895 |
| 220 | 0.325   | 0.3005  | 3.76E-06 | 0.000246 | -8.30919 |
| 222 | 0.32775 | 0.30325 | 3.79E-06 | 0.000246 | -8.30933 |
| 224 | 0.3315  | 0.307   | 3.84E-06 | 0.000246 | -8.30952 |
| 226 | 0.3335  | 0.309   | 3.86E-06 | 0.000246 | -8.30962 |
| 228 | 0.3365  | 0.312   | 3.9E-06  | 0.000246 | -8.30977 |
| 230 | 0.3415  | 0.317   | 3.96E-06 | 0.000246 | -8.31003 |
| 232 | 0.34375 | 0.31925 | 3.99E-06 | 0.000246 | -8.31014 |
| 234 | 0.3485  | 0.324   | 4.05E-06 | 0.000246 | -8.31038 |
| 236 | 0.35025 | 0.32575 | 4.07E-06 | 0.000246 | -8.31047 |
| 238 | 0.35425 | 0.32975 | 4.12E-06 | 0.000246 | -8.31067 |
| 240 | 0.35775 | 0.33325 | 4.17E-06 | 0.000246 | -8.31085 |
| 242 | 0.3615  | 0.337   | 4.21E-06 | 0.000246 | -8.31104 |
| 244 | 0.364   | 0.3395  | 4.24E-06 | 0.000246 | -8.31117 |
| 246 | 0.36625 | 0.34175 | 4.27E-06 | 0.000246 | -8.31128 |
| 248 | 0.369   | 0.3445  | 4.31E-06 | 0.000246 | -8.31142 |
| 250 | 0.37275 | 0.34825 | 4.35E-06 | 0.000246 | -8.31162 |
| 252 | 0.37775 | 0.35325 | 4.42E-06 | 0.000246 | -8.31187 |
| 254 | 0.37925 | 0.35475 | 4.43E-06 | 0.000246 | -8.31195 |
| 256 | 0.38275 | 0.35825 | 4.48E-06 | 0.000246 | -8.31212 |
| 258 | 0.386   | 0.3615  | 4.52E-06 | 0.000245 | -8.31229 |
| 260 | 0.3885  | 0.364   | 4.55E-06 | 0.000245 | -8.31242 |
| 262 | 0.39325 | 0.36875 | 4.61E-06 | 0.000245 | -8.31266 |
| 264 | 0.3945  | 0.37    | 4.63E-06 | 0.000245 | -8.31272 |
| 266 | 0.3975  | 0.373   | 4.66E-06 | 0.000245 | -8.31288 |
| 268 | 0.40275 | 0.37825 | 4.73E-06 | 0.000245 | -8.31314 |

|     |         |         |          |          |          |
|-----|---------|---------|----------|----------|----------|
| 270 | 0.405   | 0.3805  | 4.76E-06 | 0.000245 | -8.31326 |
| 272 | 0.408   | 0.3835  | 4.79E-06 | 0.000245 | -8.31341 |
| 274 | 0.413   | 0.3885  | 4.86E-06 | 0.000245 | -8.31367 |
| 276 | 0.41375 | 0.38925 | 4.87E-06 | 0.000245 | -8.3137  |
| 278 | 0.417   | 0.3925  | 4.91E-06 | 0.000245 | -8.31387 |
| 280 | 0.419   | 0.3945  | 4.93E-06 | 0.000245 | -8.31397 |
| 282 | 0.42175 | 0.39725 | 4.97E-06 | 0.000245 | -8.31411 |
| 284 | 0.426   | 0.4015  | 5.02E-06 | 0.000245 | -8.31433 |
| 286 | 0.4295  | 0.405   | 5.06E-06 | 0.000245 | -8.31451 |
| 288 | 0.43275 | 0.40825 | 5.1E-06  | 0.000245 | -8.31467 |
| 290 | 0.43675 | 0.41225 | 5.15E-06 | 0.000245 | -8.31488 |
| 292 | 0.43775 | 0.41325 | 5.17E-06 | 0.000245 | -8.31493 |
| 294 | 0.44125 | 0.41675 | 5.21E-06 | 0.000245 | -8.31511 |
| 296 | 0.4445  | 0.42    | 5.25E-06 | 0.000245 | -8.31527 |
| 298 | 0.4495  | 0.425   | 5.31E-06 | 0.000245 | -8.31553 |

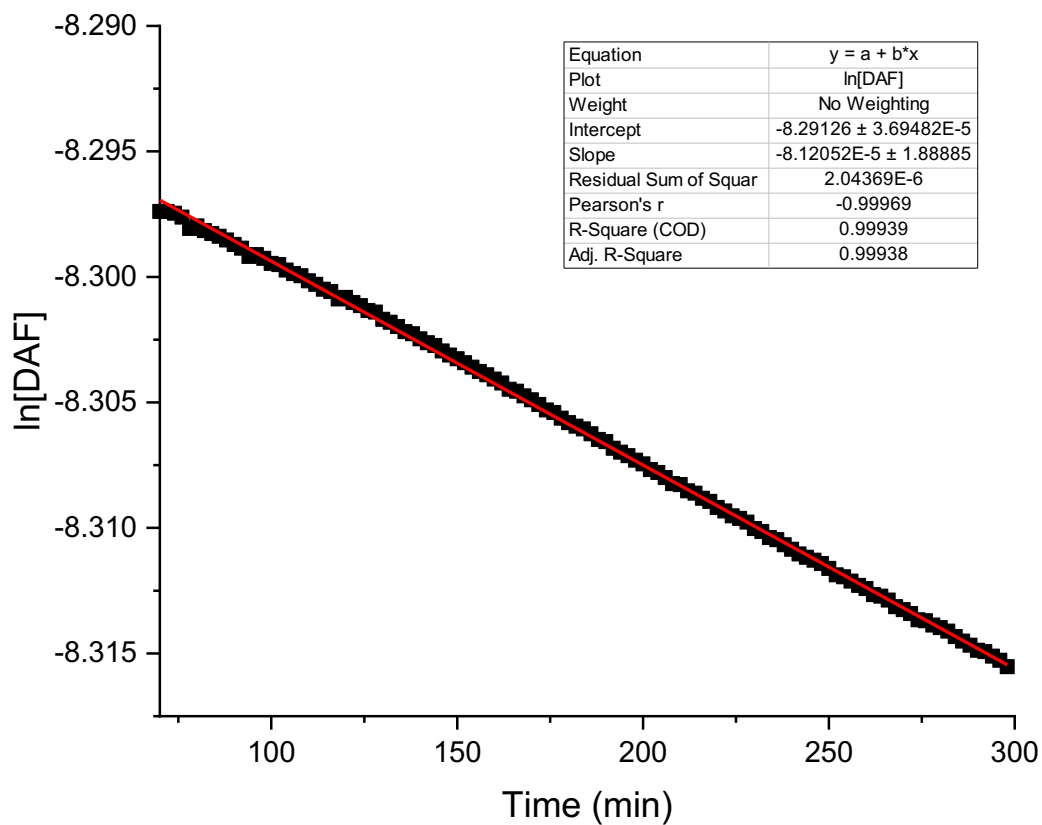

Catalysis of **DAF** to **FLU** in the presence of cage and **5 mM Na<sub>2</sub>SO<sub>4</sub>** (0.25 mM **DAF**, 50 mM pH 7 **PBS** buffer, 0.1 mM **CoH<sup>W</sup>BF<sub>4</sub>**)

| Time (min) | A@490nm | set to 0 | [FLU] (M) | [DAF] (M) | ln[DAF]  |
|------------|---------|----------|-----------|-----------|----------|
| 0          | 0.0185  | 0        | 0         | 0.00025   | -8.29405 |
| 2          | 0.0265  | 0.008    | 1E-07     | 0.00025   | -8.29445 |
| 4          | 0.031   | 0.0125   | 1.56E-07  | 0.00025   | -8.29467 |
| 6          | 0.02975 | 0.01125  | 1.41E-07  | 0.00025   | -8.29461 |
| 8          | 0.031   | 0.0125   | 1.56E-07  | 0.00025   | -8.29467 |
| 10         | 0.03175 | 0.01325  | 1.66E-07  | 0.00025   | -8.29471 |
| 12         | 0.0325  | 0.014    | 1.75E-07  | 0.00025   | -8.29475 |
| 14         | 0.0315  | 0.013    | 1.63E-07  | 0.00025   | -8.2947  |
| 16         | 0.036   | 0.0175   | 2.19E-07  | 0.00025   | -8.29493 |
| 18         | 0.0365  | 0.018    | 2.25E-07  | 0.00025   | -8.29495 |
| 20         | 0.038   | 0.0195   | 2.44E-07  | 0.00025   | -8.29503 |
| 22         | 0.0385  | 0.02     | 2.5E-07   | 0.00025   | -8.29505 |
| 24         | 0.041   | 0.0225   | 2.81E-07  | 0.00025   | -8.29518 |
| 26         | 0.04175 | 0.02325  | 2.91E-07  | 0.00025   | -8.29521 |
| 28         | 0.043   | 0.0245   | 3.06E-07  | 0.00025   | -8.29528 |
| 30         | 0.04225 | 0.02375  | 2.97E-07  | 0.00025   | -8.29524 |
| 32         | 0.0435  | 0.025    | 3.13E-07  | 0.00025   | -8.2953  |
| 34         | 0.04475 | 0.02625  | 3.28E-07  | 0.00025   | -8.29536 |
| 36         | 0.04775 | 0.02925  | 3.66E-07  | 0.00025   | -8.29551 |
| 38         | 0.048   | 0.0295   | 3.69E-07  | 0.00025   | -8.29553 |
| 40         | 0.04925 | 0.03075  | 3.84E-07  | 0.00025   | -8.29559 |
| 42         | 0.0525  | 0.034    | 4.25E-07  | 0.00025   | -8.29575 |
| 44         | 0.053   | 0.0345   | 4.31E-07  | 0.00025   | -8.29578 |
| 46         | 0.0555  | 0.037    | 4.63E-07  | 0.00025   | -8.2959  |
| 48         | 0.05725 | 0.03875  | 4.84E-07  | 0.00025   | -8.29599 |
| 50         | 0.05725 | 0.03875  | 4.84E-07  | 0.00025   | -8.29599 |
| 52         | 0.06825 | 0.04975  | 6.22E-07  | 0.000249  | -8.29654 |
| 54         | 0.0625  | 0.044    | 5.5E-07   | 0.000249  | -8.29625 |
| 56         | 0.0625  | 0.044    | 5.5E-07   | 0.000249  | -8.29625 |
| 58         | 0.065   | 0.0465   | 5.81E-07  | 0.000249  | -8.29638 |
| 60         | 0.0655  | 0.047    | 5.88E-07  | 0.000249  | -8.2964  |
| 62         | 0.06825 | 0.04975  | 6.22E-07  | 0.000249  | -8.29654 |
| 64         | 0.06925 | 0.05075  | 6.34E-07  | 0.000249  | -8.29659 |
| 66         | 0.071   | 0.0525   | 6.56E-07  | 0.000249  | -8.29668 |
| 68         | 0.075   | 0.0565   | 7.06E-07  | 0.000249  | -8.29688 |
| 70         | 0.08125 | 0.06275  | 7.84E-07  | 0.000249  | -8.29719 |
| 72         | 0.077   | 0.0585   | 7.31E-07  | 0.000249  | -8.29698 |
| 74         | 0.0785  | 0.06     | 7.5E-07   | 0.000249  | -8.29705 |
| 76         | 0.08075 | 0.06225  | 7.78E-07  | 0.000249  | -8.29717 |
| 78         | 0.0825  | 0.064    | 8E-07     | 0.000249  | -8.29725 |
| 80         | 0.0875  | 0.069    | 8.63E-07  | 0.000249  | -8.29751 |
| 82         | 0.0895  | 0.071    | 8.88E-07  | 0.000249  | -8.29761 |
| 84         | 0.08975 | 0.07125  | 8.91E-07  | 0.000249  | -8.29762 |



|     |         |         |          |          |          |
|-----|---------|---------|----------|----------|----------|
| 86  | 0.092   | 0.0735  | 9.19E-07 | 0.000249 | -8.29773 |
| 88  | 0.09425 | 0.07575 | 9.47E-07 | 0.000249 | -8.29784 |
| 90  | 0.09625 | 0.07775 | 9.72E-07 | 0.000249 | -8.29794 |
| 92  | 0.1     | 0.0815  | 1.02E-06 | 0.000249 | -8.29813 |
| 94  | 0.09925 | 0.08075 | 1.01E-06 | 0.000249 | -8.2981  |
| 96  | 0.10075 | 0.08225 | 1.03E-06 | 0.000249 | -8.29817 |
| 98  | 0.10275 | 0.08425 | 1.05E-06 | 0.000249 | -8.29827 |
| 100 | 0.10675 | 0.08825 | 1.1E-06  | 0.000249 | -8.29847 |
| 102 | 0.107   | 0.0885  | 1.11E-06 | 0.000249 | -8.29848 |
| 104 | 0.109   | 0.0905  | 1.13E-06 | 0.000249 | -8.29858 |
| 106 | 0.112   | 0.0935  | 1.17E-06 | 0.000249 | -8.29874 |
| 108 | 0.11275 | 0.09425 | 1.18E-06 | 0.000249 | -8.29877 |
| 110 | 0.11775 | 0.09925 | 1.24E-06 | 0.000249 | -8.29902 |
| 112 | 0.11775 | 0.09925 | 1.24E-06 | 0.000249 | -8.29902 |
| 114 | 0.12125 | 0.10275 | 1.28E-06 | 0.000249 | -8.2992  |
| 116 | 0.12275 | 0.10425 | 1.3E-06  | 0.000249 | -8.29928 |
| 118 | 0.12375 | 0.10525 | 1.32E-06 | 0.000249 | -8.29933 |
| 120 | 0.1275  | 0.109   | 1.36E-06 | 0.000249 | -8.29951 |
| 122 | 0.12875 | 0.11025 | 1.38E-06 | 0.000249 | -8.29958 |
| 124 | 0.13125 | 0.11275 | 1.41E-06 | 0.000249 | -8.2997  |
| 126 | 0.133   | 0.1145  | 1.43E-06 | 0.000249 | -8.29979 |
| 128 | 0.1345  | 0.116   | 1.45E-06 | 0.000249 | -8.29987 |
| 130 | 0.13725 | 0.11875 | 1.48E-06 | 0.000249 | -8.3     |
| 132 | 0.14025 | 0.12175 | 1.52E-06 | 0.000248 | -8.30016 |
| 134 | 0.14325 | 0.12475 | 1.56E-06 | 0.000248 | -8.30031 |
| 136 | 0.146   | 0.1275  | 1.59E-06 | 0.000248 | -8.30045 |
| 138 | 0.14675 | 0.12825 | 1.6E-06  | 0.000248 | -8.30048 |
| 140 | 0.1495  | 0.131   | 1.64E-06 | 0.000248 | -8.30062 |
| 142 | 0.1525  | 0.134   | 1.68E-06 | 0.000248 | -8.30077 |
| 144 | 0.15575 | 0.13725 | 1.72E-06 | 0.000248 | -8.30094 |
| 146 | 0.15675 | 0.13825 | 1.73E-06 | 0.000248 | -8.30099 |
| 148 | 0.15925 | 0.14075 | 1.76E-06 | 0.000248 | -8.30111 |
| 150 | 0.162   | 0.1435  | 1.79E-06 | 0.000248 | -8.30125 |
| 152 | 0.16575 | 0.14725 | 1.84E-06 | 0.000248 | -8.30144 |
| 154 | 0.16875 | 0.15025 | 1.88E-06 | 0.000248 | -8.30159 |
| 156 | 0.16975 | 0.15125 | 1.89E-06 | 0.000248 | -8.30164 |
| 158 | 0.17    | 0.1515  | 1.89E-06 | 0.000248 | -8.30165 |
| 160 | 0.17425 | 0.15575 | 1.95E-06 | 0.000248 | -8.30187 |
| 162 | 0.1765  | 0.158   | 1.98E-06 | 0.000248 | -8.30198 |
| 164 | 0.17875 | 0.16025 | 2E-06    | 0.000248 | -8.30209 |
| 166 | 0.181   | 0.1625  | 2.03E-06 | 0.000248 | -8.30221 |
| 168 | 0.18275 | 0.16425 | 2.05E-06 | 0.000248 | -8.3023  |
| 170 | 0.186   | 0.1675  | 2.09E-06 | 0.000248 | -8.30246 |
| 172 | 0.18925 | 0.17075 | 2.13E-06 | 0.000248 | -8.30262 |
| 174 | 0.19325 | 0.17475 | 2.18E-06 | 0.000248 | -8.30283 |
| 176 | 0.19375 | 0.17525 | 2.19E-06 | 0.000248 | -8.30285 |

|     |         |         |          |          |          |
|-----|---------|---------|----------|----------|----------|
| 178 | 0.19525 | 0.17675 | 2.21E-06 | 0.000248 | -8.30293 |
| 180 | 0.19825 | 0.17975 | 2.25E-06 | 0.000248 | -8.30308 |
| 182 | 0.20025 | 0.18175 | 2.27E-06 | 0.000248 | -8.30318 |
| 184 | 0.203   | 0.1845  | 2.31E-06 | 0.000248 | -8.30332 |
| 186 | 0.20525 | 0.18675 | 2.33E-06 | 0.000248 | -8.30343 |
| 188 | 0.208   | 0.1895  | 2.37E-06 | 0.000248 | -8.30357 |
| 190 | 0.209   | 0.1905  | 2.38E-06 | 0.000248 | -8.30362 |
| 192 | 0.2145  | 0.196   | 2.45E-06 | 0.000248 | -8.3039  |
| 194 | 0.21475 | 0.19625 | 2.45E-06 | 0.000248 | -8.30391 |
| 196 | 0.2165  | 0.198   | 2.48E-06 | 0.000248 | -8.304   |
| 198 | 0.22    | 0.2015  | 2.52E-06 | 0.000247 | -8.30418 |
| 200 | 0.222   | 0.2035  | 2.54E-06 | 0.000247 | -8.30428 |
| 202 | 0.22575 | 0.20725 | 2.59E-06 | 0.000247 | -8.30447 |
| 204 | 0.2275  | 0.209   | 2.61E-06 | 0.000247 | -8.30455 |
| 206 | 0.229   | 0.2105  | 2.63E-06 | 0.000247 | -8.30463 |
| 208 | 0.23275 | 0.21425 | 2.68E-06 | 0.000247 | -8.30482 |
| 210 | 0.23475 | 0.21625 | 2.7E-06  | 0.000247 | -8.30492 |
| 212 | 0.2395  | 0.221   | 2.76E-06 | 0.000247 | -8.30516 |
| 214 | 0.2385  | 0.22    | 2.75E-06 | 0.000247 | -8.30511 |
| 216 | 0.2425  | 0.224   | 2.8E-06  | 0.000247 | -8.30531 |
| 218 | 0.244   | 0.2255  | 2.82E-06 | 0.000247 | -8.30539 |
| 220 | 0.248   | 0.2295  | 2.87E-06 | 0.000247 | -8.30559 |
| 222 | 0.2495  | 0.231   | 2.89E-06 | 0.000247 | -8.30567 |
| 224 | 0.25325 | 0.23475 | 2.93E-06 | 0.000247 | -8.30586 |
| 226 | 0.2535  | 0.235   | 2.94E-06 | 0.000247 | -8.30587 |
| 228 | 0.25525 | 0.23675 | 2.96E-06 | 0.000247 | -8.30596 |
| 230 | 0.2595  | 0.241   | 3.01E-06 | 0.000247 | -8.30617 |
| 232 | 0.262   | 0.2435  | 3.04E-06 | 0.000247 | -8.3063  |
| 234 | 0.26475 | 0.24625 | 3.08E-06 | 0.000247 | -8.30644 |
| 236 | 0.26625 | 0.24775 | 3.1E-06  | 0.000247 | -8.30651 |
| 238 | 0.26975 | 0.25125 | 3.14E-06 | 0.000247 | -8.30669 |
| 240 | 0.27225 | 0.25375 | 3.17E-06 | 0.000247 | -8.30682 |
| 242 | 0.27525 | 0.25675 | 3.21E-06 | 0.000247 | -8.30697 |
| 244 | 0.27575 | 0.25725 | 3.22E-06 | 0.000247 | -8.307   |
| 246 | 0.27825 | 0.25975 | 3.25E-06 | 0.000247 | -8.30712 |
| 248 | 0.28025 | 0.26175 | 3.27E-06 | 0.000247 | -8.30722 |
| 250 | 0.284   | 0.2655  | 3.32E-06 | 0.000247 | -8.30741 |
| 252 | 0.2865  | 0.268   | 3.35E-06 | 0.000247 | -8.30754 |
| 254 | 0.28775 | 0.26925 | 3.37E-06 | 0.000247 | -8.3076  |
| 256 | 0.29    | 0.2715  | 3.39E-06 | 0.000247 | -8.30772 |
| 258 | 0.29325 | 0.27475 | 3.43E-06 | 0.000247 | -8.30788 |
| 260 | 0.29525 | 0.27675 | 3.46E-06 | 0.000247 | -8.30798 |
| 262 | 0.3     | 0.2815  | 3.52E-06 | 0.000246 | -8.30822 |
| 264 | 0.3     | 0.2815  | 3.52E-06 | 0.000246 | -8.30822 |
| 266 | 0.30325 | 0.28475 | 3.56E-06 | 0.000246 | -8.30839 |
| 268 | 0.30725 | 0.28875 | 3.61E-06 | 0.000246 | -8.30859 |

|     |         |         |          |          |          |
|-----|---------|---------|----------|----------|----------|
| 270 | 0.309   | 0.2905  | 3.63E-06 | 0.000246 | -8.30868 |
| 272 | 0.31025 | 0.29175 | 3.65E-06 | 0.000246 | -8.30874 |
| 274 | 0.3145  | 0.296   | 3.7E-06  | 0.000246 | -8.30896 |
| 276 | 0.3145  | 0.296   | 3.7E-06  | 0.000246 | -8.30896 |
| 278 | 0.31725 | 0.29875 | 3.73E-06 | 0.000246 | -8.3091  |
| 280 | 0.319   | 0.3005  | 3.76E-06 | 0.000246 | -8.30919 |
| 282 | 0.3225  | 0.304   | 3.8E-06  | 0.000246 | -8.30937 |
| 284 | 0.32525 | 0.30675 | 3.83E-06 | 0.000246 | -8.30951 |
| 286 | 0.3275  | 0.309   | 3.86E-06 | 0.000246 | -8.30962 |
| 288 | 0.33    | 0.3115  | 3.89E-06 | 0.000246 | -8.30975 |
| 290 | 0.3335  | 0.315   | 3.94E-06 | 0.000246 | -8.30992 |
| 292 | 0.33475 | 0.31625 | 3.95E-06 | 0.000246 | -8.30999 |
| 294 | 0.3375  | 0.319   | 3.99E-06 | 0.000246 | -8.31013 |
| 296 | 0.33925 | 0.32075 | 4.01E-06 | 0.000246 | -8.31022 |
| 298 | 0.34325 | 0.32475 | 4.06E-06 | 0.000246 | -8.31042 |

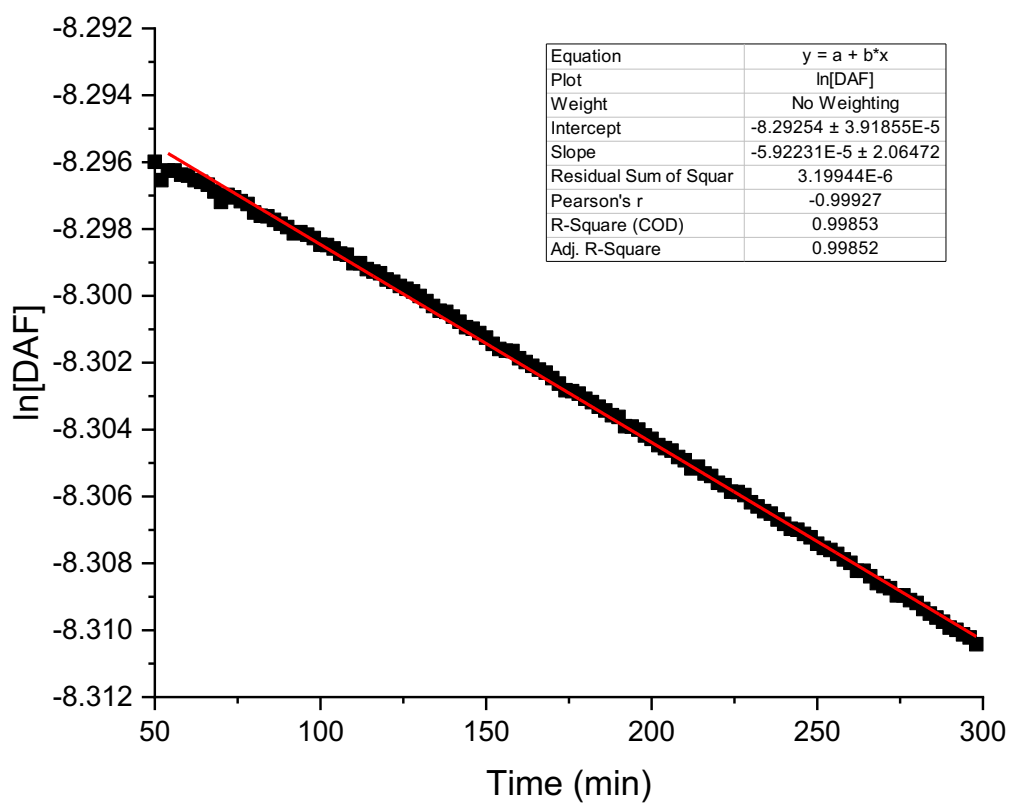

Catalysis of **DAF** to **FLU** in the presence of cage and **5 mM NaCl** (0.25 mM **DAF**, 50 mM pH 7 **PBS** buffer, 0.1 mM **CoH<sup>w</sup>BF<sub>4</sub>**)

| Time (min) | A@490nm | set to 0 | [FLU] (M) | [DAF] (M) | ln[DAF]  |
|------------|---------|----------|-----------|-----------|----------|
| 0          | 0.02575 | 0        | 0         | 0.00025   | -8.29405 |
| 2          | 0.03425 | 0.0085   | 1.06E-07  | 0.00025   | -8.29447 |
| 4          | 0.0375  | 0.01175  | 1.47E-07  | 0.00025   | -8.29464 |
| 6          | 0.0355  | 0.00975  | 1.22E-07  | 0.00025   | -8.29454 |
| 8          | 0.036   | 0.01025  | 1.28E-07  | 0.00025   | -8.29456 |
| 10         | 0.0365  | 0.01075  | 1.34E-07  | 0.00025   | -8.29459 |
| 12         | 0.0375  | 0.01175  | 1.47E-07  | 0.00025   | -8.29464 |
| 14         | 0.033   | 0.00725  | 9.06E-08  | 0.00025   | -8.29441 |
| 16         | 0.03825 | 0.0125   | 1.56E-07  | 0.00025   | -8.29467 |
| 18         | 0.03925 | 0.0135   | 1.69E-07  | 0.00025   | -8.29472 |
| 20         | 0.043   | 0.01725  | 2.16E-07  | 0.00025   | -8.29491 |
| 22         | 0.04425 | 0.0185   | 2.31E-07  | 0.00025   | -8.29498 |
| 24         | 0.0415  | 0.01575  | 1.97E-07  | 0.00025   | -8.29484 |
| 26         | 0.04375 | 0.018    | 2.25E-07  | 0.00025   | -8.29495 |
| 28         | 0.0425  | 0.01675  | 2.09E-07  | 0.00025   | -8.29489 |
| 30         | 0.042   | 0.01625  | 2.03E-07  | 0.00025   | -8.29486 |
| 32         | 0.04625 | 0.0205   | 2.56E-07  | 0.00025   | -8.29508 |
| 34         | 0.04375 | 0.018    | 2.25E-07  | 0.00025   | -8.29495 |
| 36         | 0.0485  | 0.02275  | 2.84E-07  | 0.00025   | -8.29519 |
| 38         | 0.049   | 0.02325  | 2.91E-07  | 0.00025   | -8.29521 |
| 40         | 0.04875 | 0.023    | 2.88E-07  | 0.00025   | -8.2952  |
| 42         | 0.04875 | 0.023    | 2.88E-07  | 0.00025   | -8.2952  |
| 44         | 0.0515  | 0.02575  | 3.22E-07  | 0.00025   | -8.29534 |
| 46         | 0.0535  | 0.02775  | 3.47E-07  | 0.00025   | -8.29544 |
| 48         | 0.05425 | 0.0285   | 3.56E-07  | 0.00025   | -8.29548 |
| 50         | 0.054   | 0.02825  | 3.53E-07  | 0.00025   | -8.29546 |
| 52         | 0.056   | 0.03025  | 3.78E-07  | 0.00025   | -8.29556 |
| 54         | 0.0575  | 0.03175  | 3.97E-07  | 0.00025   | -8.29564 |
| 56         | 0.0595  | 0.03375  | 4.22E-07  | 0.00025   | -8.29574 |
| 58         | 0.0615  | 0.03575  | 4.47E-07  | 0.00025   | -8.29584 |
| 60         | 0.06025 | 0.0345   | 4.31E-07  | 0.00025   | -8.29578 |
| 62         | 0.06125 | 0.0355   | 4.44E-07  | 0.00025   | -8.29583 |
| 64         | 0.0625  | 0.03675  | 4.59E-07  | 0.00025   | -8.29589 |
| 66         | 0.06425 | 0.0385   | 4.81E-07  | 0.00025   | -8.29598 |
| 68         | 0.068   | 0.04225  | 5.28E-07  | 0.000249  | -8.29616 |
| 70         | 0.0685  | 0.04275  | 5.34E-07  | 0.000249  | -8.29619 |
| 72         | 0.06875 | 0.043    | 5.38E-07  | 0.000249  | -8.2962  |
| 74         | 0.07025 | 0.0445   | 5.56E-07  | 0.000249  | -8.29628 |
| 76         | 0.0715  | 0.04575  | 5.72E-07  | 0.000249  | -8.29634 |
| 78         | 0.07275 | 0.047    | 5.88E-07  | 0.000249  | -8.2964  |
| 80         | 0.0755  | 0.04975  | 6.22E-07  | 0.000249  | -8.29654 |
| 82         | 0.07825 | 0.0525   | 6.56E-07  | 0.000249  | -8.29668 |
| 84         | 0.07975 | 0.054    | 6.75E-07  | 0.000249  | -8.29675 |

|     |         |         |          |          |          |
|-----|---------|---------|----------|----------|----------|
| 86  | 0.0805  | 0.05475 | 6.84E-07 | 0.000249 | -8.29679 |
| 88  | 0.0815  | 0.05575 | 6.97E-07 | 0.000249 | -8.29684 |
| 90  | 0.08325 | 0.0575  | 7.19E-07 | 0.000249 | -8.29693 |
| 92  | 0.08475 | 0.059   | 7.38E-07 | 0.000249 | -8.297   |
| 94  | 0.0845  | 0.05875 | 7.34E-07 | 0.000249 | -8.29699 |
| 96  | 0.087   | 0.06125 | 7.66E-07 | 0.000249 | -8.29712 |
| 98  | 0.08825 | 0.0625  | 7.81E-07 | 0.000249 | -8.29718 |
| 100 | 0.09025 | 0.0645  | 8.06E-07 | 0.000249 | -8.29728 |
| 102 | 0.09125 | 0.0655  | 8.19E-07 | 0.000249 | -8.29733 |
| 104 | 0.0925  | 0.06675 | 8.34E-07 | 0.000249 | -8.29739 |
| 106 | 0.09575 | 0.07    | 8.75E-07 | 0.000249 | -8.29756 |
| 108 | 0.09575 | 0.07    | 8.75E-07 | 0.000249 | -8.29756 |
| 110 | 0.1005  | 0.07475 | 9.34E-07 | 0.000249 | -8.29779 |
| 112 | 0.09875 | 0.073   | 9.13E-07 | 0.000249 | -8.29771 |
| 114 | 0.10125 | 0.0755  | 9.44E-07 | 0.000249 | -8.29783 |
| 116 | 0.1035  | 0.07775 | 9.72E-07 | 0.000249 | -8.29794 |
| 118 | 0.103   | 0.07725 | 9.66E-07 | 0.000249 | -8.29792 |
| 120 | 0.10625 | 0.0805  | 1.01E-06 | 0.000249 | -8.29808 |
| 122 | 0.10775 | 0.082   | 1.03E-06 | 0.000249 | -8.29816 |
| 124 | 0.1105  | 0.08475 | 1.06E-06 | 0.000249 | -8.2983  |
| 126 | 0.1115  | 0.08575 | 1.07E-06 | 0.000249 | -8.29835 |
| 128 | 0.1135  | 0.08775 | 1.1E-06  | 0.000249 | -8.29845 |
| 130 | 0.1145  | 0.08875 | 1.11E-06 | 0.000249 | -8.2985  |
| 132 | 0.1165  | 0.09075 | 1.13E-06 | 0.000249 | -8.2986  |
| 134 | 0.1195  | 0.09375 | 1.17E-06 | 0.000249 | -8.29875 |
| 136 | 0.12075 | 0.095   | 1.19E-06 | 0.000249 | -8.29881 |
| 138 | 0.1215  | 0.09575 | 1.2E-06  | 0.000249 | -8.29885 |
| 140 | 0.1245  | 0.09875 | 1.23E-06 | 0.000249 | -8.299   |
| 142 | 0.12725 | 0.1015  | 1.27E-06 | 0.000249 | -8.29914 |
| 144 | 0.12775 | 0.102   | 1.28E-06 | 0.000249 | -8.29916 |
| 146 | 0.1295  | 0.10375 | 1.3E-06  | 0.000249 | -8.29925 |
| 148 | 0.1325  | 0.10675 | 1.33E-06 | 0.000249 | -8.2994  |
| 150 | 0.132   | 0.10625 | 1.33E-06 | 0.000249 | -8.29938 |
| 152 | 0.13525 | 0.1095  | 1.37E-06 | 0.000249 | -8.29954 |
| 154 | 0.13625 | 0.1105  | 1.38E-06 | 0.000249 | -8.29959 |
| 156 | 0.14075 | 0.115   | 1.44E-06 | 0.000249 | -8.29982 |
| 158 | 0.1405  | 0.11475 | 1.43E-06 | 0.000249 | -8.2998  |
| 160 | 0.1415  | 0.11575 | 1.45E-06 | 0.000249 | -8.29985 |
| 162 | 0.14275 | 0.117   | 1.46E-06 | 0.000249 | -8.29992 |
| 164 | 0.1465  | 0.12075 | 1.51E-06 | 0.000248 | -8.30011 |
| 166 | 0.14925 | 0.1235  | 1.54E-06 | 0.000248 | -8.30024 |
| 168 | 0.1495  | 0.12375 | 1.55E-06 | 0.000248 | -8.30026 |
| 170 | 0.15175 | 0.126   | 1.58E-06 | 0.000248 | -8.30037 |
| 172 | 0.155   | 0.12925 | 1.62E-06 | 0.000248 | -8.30053 |
| 174 | 0.15725 | 0.1315  | 1.64E-06 | 0.000248 | -8.30065 |
| 176 | 0.15775 | 0.132   | 1.65E-06 | 0.000248 | -8.30067 |

|     |         |         |          |          |          |
|-----|---------|---------|----------|----------|----------|
| 178 | 0.159   | 0.13325 | 1.67E-06 | 0.000248 | -8.30073 |
| 180 | 0.1615  | 0.13575 | 1.7E-06  | 0.000248 | -8.30086 |
| 182 | 0.16325 | 0.1375  | 1.72E-06 | 0.000248 | -8.30095 |
| 184 | 0.1655  | 0.13975 | 1.75E-06 | 0.000248 | -8.30106 |
| 186 | 0.1665  | 0.14075 | 1.76E-06 | 0.000248 | -8.30111 |
| 188 | 0.17025 | 0.1445  | 1.81E-06 | 0.000248 | -8.3013  |
| 190 | 0.16975 | 0.144   | 1.8E-06  | 0.000248 | -8.30128 |
| 192 | 0.1735  | 0.14775 | 1.85E-06 | 0.000248 | -8.30146 |
| 194 | 0.1765  | 0.15075 | 1.88E-06 | 0.000248 | -8.30162 |
| 196 | 0.176   | 0.15025 | 1.88E-06 | 0.000248 | -8.30159 |
| 198 | 0.17825 | 0.1525  | 1.91E-06 | 0.000248 | -8.3017  |
| 200 | 0.18025 | 0.1545  | 1.93E-06 | 0.000248 | -8.3018  |
| 202 | 0.183   | 0.15725 | 1.97E-06 | 0.000248 | -8.30194 |
| 204 | 0.184   | 0.15825 | 1.98E-06 | 0.000248 | -8.30199 |
| 206 | 0.186   | 0.16025 | 2E-06    | 0.000248 | -8.30209 |
| 208 | 0.18875 | 0.163   | 2.04E-06 | 0.000248 | -8.30223 |
| 210 | 0.18925 | 0.1635  | 2.04E-06 | 0.000248 | -8.30226 |
| 212 | 0.19275 | 0.167   | 2.09E-06 | 0.000248 | -8.30243 |
| 214 | 0.1945  | 0.16875 | 2.11E-06 | 0.000248 | -8.30252 |
| 216 | 0.19675 | 0.171   | 2.14E-06 | 0.000248 | -8.30264 |
| 218 | 0.197   | 0.17125 | 2.14E-06 | 0.000248 | -8.30265 |
| 220 | 0.1995  | 0.17375 | 2.17E-06 | 0.000248 | -8.30278 |
| 222 | 0.20275 | 0.177   | 2.21E-06 | 0.000248 | -8.30294 |
| 224 | 0.20475 | 0.179   | 2.24E-06 | 0.000248 | -8.30304 |
| 226 | 0.20525 | 0.1795  | 2.24E-06 | 0.000248 | -8.30307 |
| 228 | 0.20725 | 0.1815  | 2.27E-06 | 0.000248 | -8.30317 |
| 230 | 0.21075 | 0.185   | 2.31E-06 | 0.000248 | -8.30334 |
| 232 | 0.2125  | 0.18675 | 2.33E-06 | 0.000248 | -8.30343 |
| 234 | 0.2145  | 0.18875 | 2.36E-06 | 0.000248 | -8.30353 |
| 236 | 0.21625 | 0.1905  | 2.38E-06 | 0.000248 | -8.30362 |
| 238 | 0.2195  | 0.19375 | 2.42E-06 | 0.000248 | -8.30378 |
| 240 | 0.21925 | 0.1935  | 2.42E-06 | 0.000248 | -8.30377 |
| 242 | 0.22175 | 0.196   | 2.45E-06 | 0.000248 | -8.3039  |
| 244 | 0.22325 | 0.1975  | 2.47E-06 | 0.000248 | -8.30397 |
| 246 | 0.22425 | 0.1985  | 2.48E-06 | 0.000248 | -8.30402 |
| 248 | 0.2265  | 0.20075 | 2.51E-06 | 0.000247 | -8.30414 |
| 250 | 0.229   | 0.20325 | 2.54E-06 | 0.000247 | -8.30426 |
| 252 | 0.23075 | 0.205   | 2.56E-06 | 0.000247 | -8.30435 |
| 254 | 0.23275 | 0.207   | 2.59E-06 | 0.000247 | -8.30445 |
| 256 | 0.23575 | 0.21    | 2.63E-06 | 0.000247 | -8.30461 |
| 258 | 0.23825 | 0.2125  | 2.66E-06 | 0.000247 | -8.30473 |
| 260 | 0.2395  | 0.21375 | 2.67E-06 | 0.000247 | -8.30479 |
| 262 | 0.24175 | 0.216   | 2.7E-06  | 0.000247 | -8.30491 |
| 264 | 0.24325 | 0.2175  | 2.72E-06 | 0.000247 | -8.30498 |
| 266 | 0.245   | 0.21925 | 2.74E-06 | 0.000247 | -8.30507 |
| 268 | 0.2485  | 0.22275 | 2.78E-06 | 0.000247 | -8.30525 |

|     |         |         |          |          |          |
|-----|---------|---------|----------|----------|----------|
| 270 | 0.2495  | 0.22375 | 2.8E-06  | 0.000247 | -8.3053  |
| 272 | 0.25175 | 0.226   | 2.83E-06 | 0.000247 | -8.30541 |
| 274 | 0.2545  | 0.22875 | 2.86E-06 | 0.000247 | -8.30555 |
| 276 | 0.2545  | 0.22875 | 2.86E-06 | 0.000247 | -8.30555 |
| 278 | 0.257   | 0.23125 | 2.89E-06 | 0.000247 | -8.30568 |
| 280 | 0.25975 | 0.234   | 2.93E-06 | 0.000247 | -8.30582 |
| 282 | 0.26225 | 0.2365  | 2.96E-06 | 0.000247 | -8.30595 |
| 284 | 0.26275 | 0.237   | 2.96E-06 | 0.000247 | -8.30597 |
| 286 | 0.265   | 0.23925 | 2.99E-06 | 0.000247 | -8.30608 |
| 288 | 0.267   | 0.24125 | 3.02E-06 | 0.000247 | -8.30619 |
| 290 | 0.27125 | 0.2455  | 3.07E-06 | 0.000247 | -8.3064  |
| 292 | 0.272   | 0.24625 | 3.08E-06 | 0.000247 | -8.30644 |
| 294 | 0.27325 | 0.2475  | 3.09E-06 | 0.000247 | -8.3065  |
| 296 | 0.27625 | 0.2505  | 3.13E-06 | 0.000247 | -8.30665 |
| 298 | 0.28    | 0.25425 | 3.18E-06 | 0.000247 | -8.30684 |

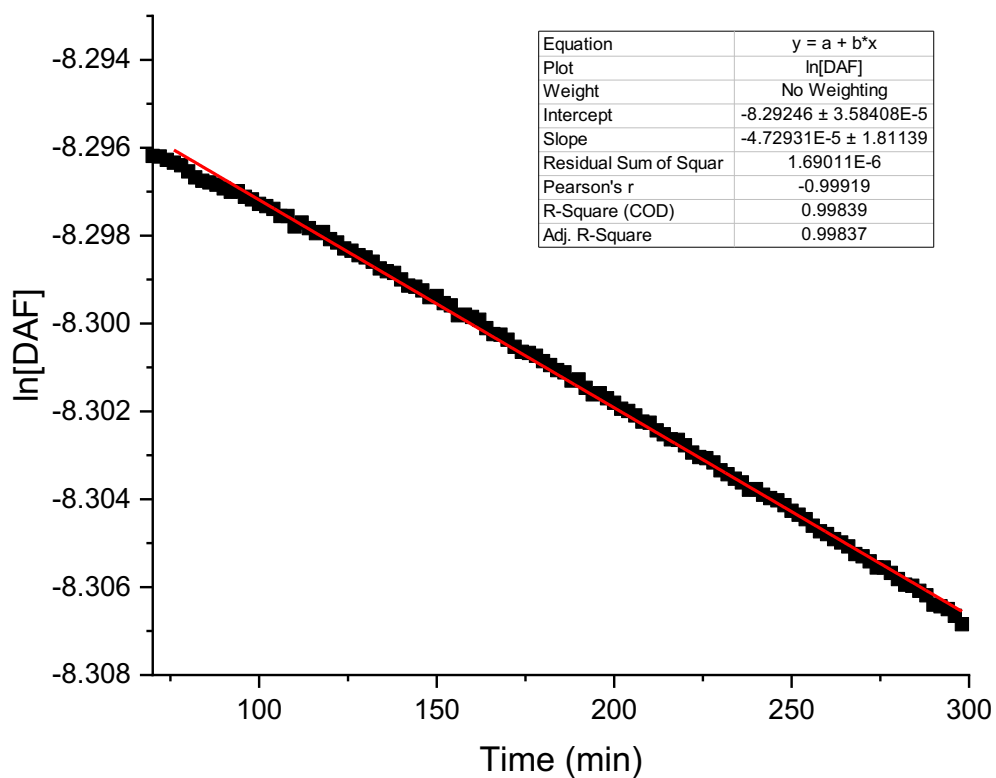

Catalysis of **DAF** to **FLU** in the presence of cage and **5 mM NaIO<sub>3</sub>** (0.25 mM **DAF**, 50 mM pH 7 **PBS** buffer, 0.1 mM **CoH<sup>W</sup>BF<sub>4</sub>**)

| Time (min) | A@490nm | set to 0 | [FLU] (M) | [DAF] (M) | ln[DAF]  |
|------------|---------|----------|-----------|-----------|----------|
| 0          | 0.02125 | 0        | 0         | 0.00025   | -8.29405 |
| 2          | 0.0265  | 0.00525  | 6.56E-08  | 0.00025   | -8.29431 |
| 4          | 0.02825 | 0.007    | 8.75E-08  | 0.00025   | -8.2944  |
| 6          | 0.02925 | 0.008    | 1E-07     | 0.00025   | -8.29445 |
| 8          | 0.02775 | 0.0065   | 8.13E-08  | 0.00025   | -8.29437 |
| 10         | 0.0315  | 0.01025  | 1.28E-07  | 0.00025   | -8.29456 |
| 12         | 0.032   | 0.01075  | 1.34E-07  | 0.00025   | -8.29459 |
| 14         | 0.029   | 0.00775  | 9.69E-08  | 0.00025   | -8.29444 |
| 16         | 0.03475 | 0.0135   | 1.69E-07  | 0.00025   | -8.29472 |
| 18         | 0.037   | 0.01575  | 1.97E-07  | 0.00025   | -8.29484 |
| 20         | 0.03725 | 0.016    | 2E-07     | 0.00025   | -8.29485 |
| 22         | 0.04    | 0.01875  | 2.34E-07  | 0.00025   | -8.29499 |
| 24         | 0.03975 | 0.0185   | 2.31E-07  | 0.00025   | -8.29498 |
| 26         | 0.041   | 0.01975  | 2.47E-07  | 0.00025   | -8.29504 |
| 28         | 0.04275 | 0.0215   | 2.69E-07  | 0.00025   | -8.29513 |
| 30         | 0.043   | 0.02175  | 2.72E-07  | 0.00025   | -8.29514 |
| 32         | 0.04375 | 0.0225   | 2.81E-07  | 0.00025   | -8.29518 |
| 34         | 0.04475 | 0.0235   | 2.94E-07  | 0.00025   | -8.29523 |
| 36         | 0.0485  | 0.02725  | 3.41E-07  | 0.00025   | -8.29541 |
| 38         | 0.05075 | 0.0295   | 3.69E-07  | 0.00025   | -8.29553 |
| 40         | 0.0485  | 0.02725  | 3.41E-07  | 0.00025   | -8.29541 |
| 42         | 0.05125 | 0.03     | 3.75E-07  | 0.00025   | -8.29555 |
| 44         | 0.0585  | 0.03725  | 4.66E-07  | 0.00025   | -8.29591 |
| 46         | 0.05775 | 0.0365   | 4.56E-07  | 0.00025   | -8.29588 |
| 48         | 0.059   | 0.03775  | 4.72E-07  | 0.00025   | -8.29594 |
| 50         | 0.0585  | 0.03725  | 4.66E-07  | 0.00025   | -8.29591 |
| 52         | 0.063   | 0.04175  | 5.22E-07  | 0.000249  | -8.29614 |
| 54         | 0.06275 | 0.0415   | 5.19E-07  | 0.000249  | -8.29613 |
| 56         | 0.06325 | 0.042    | 5.25E-07  | 0.000249  | -8.29615 |
| 58         | 0.07275 | 0.0515   | 6.44E-07  | 0.000249  | -8.29663 |
| 60         | 0.068   | 0.04675  | 5.84E-07  | 0.000249  | -8.29639 |
| 62         | 0.06975 | 0.0485   | 6.06E-07  | 0.000249  | -8.29648 |
| 64         | 0.07275 | 0.0515   | 6.44E-07  | 0.000249  | -8.29663 |
| 66         | 0.07575 | 0.0545   | 6.81E-07  | 0.000249  | -8.29678 |
| 68         | 0.07725 | 0.056    | 7E-07     | 0.000249  | -8.29685 |
| 70         | 0.08275 | 0.0615   | 7.69E-07  | 0.000249  | -8.29713 |
| 72         | 0.08175 | 0.0605   | 7.56E-07  | 0.000249  | -8.29708 |
| 74         | 0.08275 | 0.0615   | 7.69E-07  | 0.000249  | -8.29713 |
| 76         | 0.08475 | 0.0635   | 7.94E-07  | 0.000249  | -8.29723 |
| 78         | 0.08775 | 0.0665   | 8.31E-07  | 0.000249  | -8.29738 |
| 80         | 0.09    | 0.06875  | 8.59E-07  | 0.000249  | -8.29749 |
| 82         | 0.09475 | 0.0735   | 9.19E-07  | 0.000249  | -8.29773 |
| 84         | 0.09425 | 0.073    | 9.13E-07  | 0.000249  | -8.29771 |



|     |         |         |          |          |          |
|-----|---------|---------|----------|----------|----------|
| 86  | 0.097   | 0.07575 | 9.47E-07 | 0.000249 | -8.29784 |
| 88  | 0.0995  | 0.07825 | 9.78E-07 | 0.000249 | -8.29797 |
| 90  | 0.10175 | 0.0805  | 1.01E-06 | 0.000249 | -8.29808 |
| 92  | 0.10475 | 0.0835  | 1.04E-06 | 0.000249 | -8.29823 |
| 94  | 0.106   | 0.08475 | 1.06E-06 | 0.000249 | -8.2983  |
| 96  | 0.109   | 0.08775 | 1.1E-06  | 0.000249 | -8.29845 |
| 98  | 0.1105  | 0.08925 | 1.12E-06 | 0.000249 | -8.29852 |
| 100 | 0.11275 | 0.0915  | 1.14E-06 | 0.000249 | -8.29864 |
| 102 | 0.1145  | 0.09325 | 1.17E-06 | 0.000249 | -8.29872 |
| 104 | 0.11925 | 0.098   | 1.23E-06 | 0.000249 | -8.29896 |
| 106 | 0.11975 | 0.0985  | 1.23E-06 | 0.000249 | -8.29899 |
| 108 | 0.11975 | 0.0985  | 1.23E-06 | 0.000249 | -8.29899 |
| 110 | 0.12425 | 0.103   | 1.29E-06 | 0.000249 | -8.29921 |
| 112 | 0.126   | 0.10475 | 1.31E-06 | 0.000249 | -8.2993  |
| 114 | 0.128   | 0.10675 | 1.33E-06 | 0.000249 | -8.2994  |
| 116 | 0.13    | 0.10875 | 1.36E-06 | 0.000249 | -8.2995  |
| 118 | 0.13325 | 0.112   | 1.4E-06  | 0.000249 | -8.29967 |
| 120 | 0.135   | 0.11375 | 1.42E-06 | 0.000249 | -8.29975 |
| 122 | 0.1375  | 0.11625 | 1.45E-06 | 0.000249 | -8.29988 |
| 124 | 0.14025 | 0.119   | 1.49E-06 | 0.000249 | -8.30002 |
| 126 | 0.14225 | 0.121   | 1.51E-06 | 0.000248 | -8.30012 |
| 128 | 0.14425 | 0.123   | 1.54E-06 | 0.000248 | -8.30022 |
| 130 | 0.1465  | 0.12525 | 1.57E-06 | 0.000248 | -8.30033 |
| 132 | 0.14875 | 0.1275  | 1.59E-06 | 0.000248 | -8.30045 |
| 134 | 0.15225 | 0.131   | 1.64E-06 | 0.000248 | -8.30062 |
| 136 | 0.15525 | 0.134   | 1.68E-06 | 0.000248 | -8.30077 |
| 138 | 0.15525 | 0.134   | 1.68E-06 | 0.000248 | -8.30077 |
| 140 | 0.159   | 0.13775 | 1.72E-06 | 0.000248 | -8.30096 |
| 142 | 0.163   | 0.14175 | 1.77E-06 | 0.000248 | -8.30116 |
| 144 | 0.1665  | 0.14525 | 1.82E-06 | 0.000248 | -8.30134 |
| 146 | 0.16525 | 0.144   | 1.8E-06  | 0.000248 | -8.30128 |
| 148 | 0.17025 | 0.149   | 1.86E-06 | 0.000248 | -8.30153 |
| 150 | 0.1705  | 0.14925 | 1.87E-06 | 0.000248 | -8.30154 |
| 152 | 0.17425 | 0.153   | 1.91E-06 | 0.000248 | -8.30173 |
| 154 | 0.176   | 0.15475 | 1.93E-06 | 0.000248 | -8.30182 |
| 156 | 0.17975 | 0.1585  | 1.98E-06 | 0.000248 | -8.30201 |
| 158 | 0.17975 | 0.1585  | 1.98E-06 | 0.000248 | -8.30201 |
| 160 | 0.1845  | 0.16325 | 2.04E-06 | 0.000248 | -8.30225 |
| 162 | 0.1845  | 0.16325 | 2.04E-06 | 0.000248 | -8.30225 |
| 164 | 0.1885  | 0.16725 | 2.09E-06 | 0.000248 | -8.30245 |
| 166 | 0.1895  | 0.16825 | 2.1E-06  | 0.000248 | -8.3025  |
| 168 | 0.1925  | 0.17125 | 2.14E-06 | 0.000248 | -8.30265 |
| 170 | 0.19625 | 0.175   | 2.19E-06 | 0.000248 | -8.30284 |
| 172 | 0.2025  | 0.18125 | 2.27E-06 | 0.000248 | -8.30315 |
| 174 | 0.204   | 0.18275 | 2.28E-06 | 0.000248 | -8.30323 |
| 176 | 0.20525 | 0.184   | 2.3E-06  | 0.000248 | -8.30329 |

|     |         |         |          |          |          |
|-----|---------|---------|----------|----------|----------|
| 178 | 0.20725 | 0.186   | 2.33E-06 | 0.000248 | -8.30339 |
| 180 | 0.211   | 0.18975 | 2.37E-06 | 0.000248 | -8.30358 |
| 182 | 0.2135  | 0.19225 | 2.4E-06  | 0.000248 | -8.30371 |
| 184 | 0.21525 | 0.194   | 2.43E-06 | 0.000248 | -8.3038  |
| 186 | 0.21775 | 0.1965  | 2.46E-06 | 0.000248 | -8.30392 |
| 188 | 0.22075 | 0.1995  | 2.49E-06 | 0.000248 | -8.30407 |
| 190 | 0.221   | 0.19975 | 2.5E-06  | 0.000248 | -8.30409 |
| 192 | 0.226   | 0.20475 | 2.56E-06 | 0.000247 | -8.30434 |
| 194 | 0.2275  | 0.20625 | 2.58E-06 | 0.000247 | -8.30442 |
| 196 | 0.22875 | 0.2075  | 2.59E-06 | 0.000247 | -8.30448 |
| 198 | 0.23175 | 0.2105  | 2.63E-06 | 0.000247 | -8.30463 |
| 200 | 0.2345  | 0.21325 | 2.67E-06 | 0.000247 | -8.30477 |
| 202 | 0.2375  | 0.21625 | 2.7E-06  | 0.000247 | -8.30492 |
| 204 | 0.238   | 0.21675 | 2.71E-06 | 0.000247 | -8.30495 |
| 206 | 0.24075 | 0.2195  | 2.74E-06 | 0.000247 | -8.30509 |
| 208 | 0.24375 | 0.2225  | 2.78E-06 | 0.000247 | -8.30524 |
| 210 | 0.24525 | 0.224   | 2.8E-06  | 0.000247 | -8.30531 |
| 212 | 0.24775 | 0.2265  | 2.83E-06 | 0.000247 | -8.30544 |
| 214 | 0.25    | 0.22875 | 2.86E-06 | 0.000247 | -8.30555 |
| 216 | 0.2525  | 0.23125 | 2.89E-06 | 0.000247 | -8.30568 |
| 218 | 0.2545  | 0.23325 | 2.92E-06 | 0.000247 | -8.30578 |
| 220 | 0.258   | 0.23675 | 2.96E-06 | 0.000247 | -8.30596 |
| 222 | 0.26075 | 0.2395  | 2.99E-06 | 0.000247 | -8.3061  |
| 224 | 0.26325 | 0.242   | 3.03E-06 | 0.000247 | -8.30622 |
| 226 | 0.2645  | 0.24325 | 3.04E-06 | 0.000247 | -8.30629 |
| 228 | 0.26625 | 0.245   | 3.06E-06 | 0.000247 | -8.30638 |
| 230 | 0.27025 | 0.249   | 3.11E-06 | 0.000247 | -8.30658 |
| 232 | 0.27275 | 0.2515  | 3.14E-06 | 0.000247 | -8.3067  |
| 234 | 0.2755  | 0.25425 | 3.18E-06 | 0.000247 | -8.30684 |
| 236 | 0.27775 | 0.2565  | 3.21E-06 | 0.000247 | -8.30696 |
| 238 | 0.28075 | 0.2595  | 3.24E-06 | 0.000247 | -8.30711 |
| 240 | 0.282   | 0.26075 | 3.26E-06 | 0.000247 | -8.30717 |
| 242 | 0.2855  | 0.26425 | 3.3E-06  | 0.000247 | -8.30735 |
| 244 | 0.28675 | 0.2655  | 3.32E-06 | 0.000247 | -8.30741 |
| 246 | 0.2885  | 0.26725 | 3.34E-06 | 0.000247 | -8.3075  |
| 248 | 0.291   | 0.26975 | 3.37E-06 | 0.000247 | -8.30763 |
| 250 | 0.29475 | 0.2735  | 3.42E-06 | 0.000247 | -8.30782 |
| 252 | 0.29625 | 0.275   | 3.44E-06 | 0.000247 | -8.3079  |
| 254 | 0.29875 | 0.2775  | 3.47E-06 | 0.000247 | -8.30802 |
| 256 | 0.3015  | 0.28025 | 3.5E-06  | 0.000246 | -8.30816 |
| 258 | 0.3045  | 0.28325 | 3.54E-06 | 0.000246 | -8.30831 |
| 260 | 0.30675 | 0.2855  | 3.57E-06 | 0.000246 | -8.30843 |
| 262 | 0.30925 | 0.288   | 3.6E-06  | 0.000246 | -8.30855 |
| 264 | 0.31175 | 0.2905  | 3.63E-06 | 0.000246 | -8.30868 |
| 266 | 0.313   | 0.29175 | 3.65E-06 | 0.000246 | -8.30874 |
| 268 | 0.31675 | 0.2955  | 3.69E-06 | 0.000246 | -8.30893 |

|     |         |         |          |          |          |
|-----|---------|---------|----------|----------|----------|
| 270 | 0.31925 | 0.298   | 3.73E-06 | 0.000246 | -8.30906 |
| 272 | 0.32    | 0.29875 | 3.73E-06 | 0.000246 | -8.3091  |
| 274 | 0.32575 | 0.3045  | 3.81E-06 | 0.000246 | -8.30939 |
| 276 | 0.327   | 0.30575 | 3.82E-06 | 0.000246 | -8.30946 |
| 278 | 0.3285  | 0.30725 | 3.84E-06 | 0.000246 | -8.30953 |
| 280 | 0.33025 | 0.309   | 3.86E-06 | 0.000246 | -8.30962 |
| 282 | 0.333   | 0.31175 | 3.9E-06  | 0.000246 | -8.30976 |
| 284 | 0.33575 | 0.3145  | 3.93E-06 | 0.000246 | -8.3099  |
| 286 | 0.33775 | 0.3165  | 3.96E-06 | 0.000246 | -8.31    |
| 288 | 0.34075 | 0.3195  | 3.99E-06 | 0.000246 | -8.31015 |
| 290 | 0.34475 | 0.3235  | 4.04E-06 | 0.000246 | -8.31036 |
| 292 | 0.346   | 0.32475 | 4.06E-06 | 0.000246 | -8.31042 |
| 294 | 0.348   | 0.32675 | 4.08E-06 | 0.000246 | -8.31052 |
| 296 | 0.34975 | 0.3285  | 4.11E-06 | 0.000246 | -8.31061 |
| 298 | 0.353   | 0.33175 | 4.15E-06 | 0.000246 | -8.31078 |

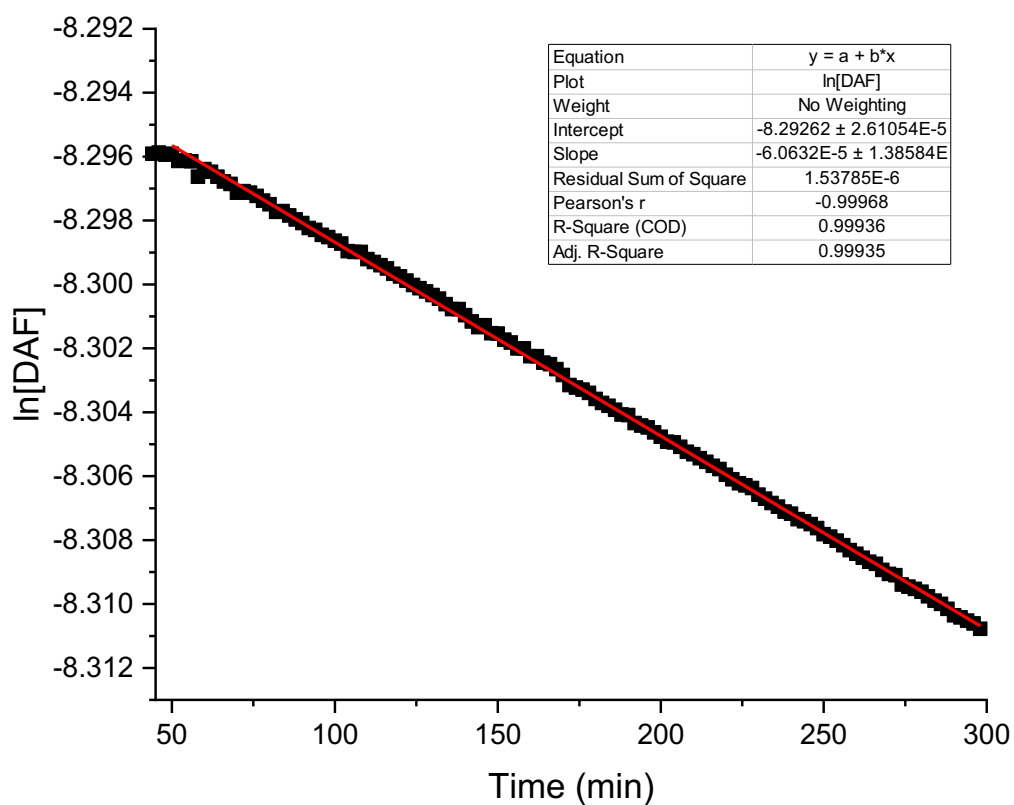

Supplement: d2dt01713j1.pdf [file d2dt01713j1.pdf]
